# Supplementary material for: The effectiveness of filtering glycopeptide peak list files for Y ions
Source: Royal Society of Chemistry journal article supplement (doi:10.1039/c9mo00178f), 2020-02-06
Supplement: c9mo00178f1.xlsx [file c9mo00178f1.xlsx]

## Sheet: DBSearch_no_incmi
	Uniq Pep	Acc #	Num Unique	m/z	z	ppm	DB Peptide	Variable Mods	Fraction	RT	Spectrum	MSMS Info	Score	Expect	# in DB	Protein MW	Species	Protein Name
[22]		P02765	6	1148.73	4	5.5	AALAAFNAQNNGSNFQLEEISR	HexNAc4Hex4FucNeuAc2+Cation:K@11	glycopepnew_HCDEThcDiTCIDpeptide_EThcDpd2	45.05	1	12707	44.7	2.6e-15	1	39325	HUMAN	Alpha-2-HS-glycoprotein
[22]		P02765	6	1143.24	4	1.9	AALAAFNAQNNGSNFQLEEISR	HexNAc4Hex5NeuAc2@11	glycopepnew_HCDEThcDiTCIDpeptide_EThcDpd2	44.95	2	12674	48.7	2.2e-13	1	39325	HUMAN	Alpha-2-HS-glycoprotein
[1]		P01009	129	1200.23	4	-1	ADTHDEILEGLNFNLTEI	HexNAc5Hex6FucNeuAc2+Cation:K@14	glycopepnew_HCDEThcDiTCIDpeptide_EThcDpd2	57.667	1	16779	25	1.1e-07	1	46736.9	HUMAN	Alpha-1-antitrypsin
[1]		P01009	129	1257.77	4	2.2	ADTHDEILEGLNFNLTEI	HexNAc9Hex6Fuc+Cation:K@14	glycopepnew_HCDEThcDiTCIDpeptide_EThcDpd2	68.933	1	20373	13	2.3e-06	1	46736.9	HUMAN	Alpha-1-antitrypsin
[1]		P01009	129	1134.48	4	-0.43	ADTHDEILEGLNFNLTEIP	HexNAc7Hex6@14	glycopepnew_HCDEThcDiTCIDpeptide_EThcDpd2	62.417	2	18319	28	2.3e-08	1	46736.9	HUMAN	Alpha-1-antitrypsin
[1]		P01009	129	1231.78	4	-1.8	ADTHDEILEGLNFNLTEIPEAQIH	HexNAc4Hex5NeuAc2@14	glycopepnew_HCDEThcDiTCIDpeptide_EThcDpd2	55.767	1	16177	21	3e-07	1	46736.9	HUMAN	Alpha-1-antitrypsin
[1]		P01009	129	1134.49	4	-4.3	ADTHDEILEGLNFNLTEIPEAQIHEGF	HexNAc4Hex3Fuc+Cation:K@14	glycopepnew_HCDEThcDiTCIDpeptide_EThcDpd2	53.383	1	15427	19	4.4e-06	1	46736.9	HUMAN	Alpha-1-antitrypsin
[1]		P01009	129	974.483	4	1.6	ADTHDEILEGLNFNLTEIPEAQIHEGFQELLR	HexNAc@14	glycopepnew_HCDEThcDiTCIDpeptide_EThcDpd2	51.117	1	14688	72.4	2.5e-16	1	46736.9	HUMAN	Alpha-1-antitrypsin
[1]		P01009	129	1187.92	5	-3.3	ADTHDEILEGLNFNLTEIPEAQIHEGFQELLR	HexNAc4Hex5Fuc2NeuAc+Cation:K@14	glycopepnew_HCDEThcDiTCIDpeptide_EThcDpd2	58.95	1	17200	54.8	3.5e-18	1	46736.9	HUMAN	Alpha-1-antitrypsin
[1]		P01009	129	1282.56	5	-3.2	ADTHDEILEGLNFNLTEIPEAQIHEGFQELLR	HexNAc5Hex6Fuc3NeuAc@14	glycopepnew_HCDEThcDiTCIDpeptide_EThcDpd2	57.8	1	16823	28.8	3.3e-11	1	46736.9	HUMAN	Alpha-1-antitrypsin
[1]		P01009	129	1348.17	5	-1.6	ADTHDEILEGLNFNLTEIPEAQIHEGFQELLR	HexNAc5Hex6FucNeuAc3+Cation:K@14	glycopepnew_HCDEThcDiTCIDpeptide_EThcDpd2	62.917	1	18467	78.8	1.8e-30	1	46736.9	HUMAN	Alpha-1-antitrypsin
[1]		P01009	129	1311.37	5	-1.4	ADTHDEILEGLNFNLTEIPEAQIHEGFQELLR	HexNAc5Hex6NeuAc3@14||HexNAc6Hex9Fuc+Cation:K@14	glycopepnew_HCDEThcDiTCIDpeptide_EThcDpd2	71.333	1	21162	14.4	7.2e-05	1	46736.9	HUMAN	Alpha-1-antitrypsin
[1]		P01009	129	1208.84	6	-1.8	ADTHDEILEGLNFNLTEIPEAQIHEGFQELLR	HexNAc6Hex7Fuc2NeuAc3+Cation:K@14	glycopepnew_HCDEThcDiTCIDpeptide_EThcDpd2	69.683	1	20612	60.6	1.7e-18	1	46736.9	HUMAN	Alpha-1-antitrypsin
[1]		P01009	129	1384.8	5	-5.2	ADTHDEILEGLNFNLTEIPEAQIHEGFQELLR	HexNAc6Hex7Fuc4NeuAc@14	glycopepnew_HCDEThcDiTCIDpeptide_EThcDpd2	61.767	1	18106	31.8	2.8e-11	1	46736.9	HUMAN	Alpha-1-antitrypsin
[1]		P01009	129	1337.17	5	-0.51	ADTHDEILEGLNFNLTEIPEAQIHEGFQELLR	HexNAc6Hex8FucNeuAc+Cation:K@14	glycopepnew_HCDEThcDiTCIDpeptide_EThcDpd2	63.467	1	18639	18.4	3.4e-05	1	46736.9	HUMAN	Alpha-1-antitrypsin
[1]		P01009	129	1287.16	5	3.3	ADTHDEILEGLNFNLTEIPEAQIHEGFQELLR	HexNAc7Hex7Fuc+Cation:K@14	glycopepnew_HCDEThcDiTCIDpeptide_EThcDpd2	57.633	2	16775	31	6.9e-07	1	46736.9	HUMAN	Alpha-1-antitrypsin
[1]		P01009	129	1311.97	5	-2.2	ADTHDEILEGLNFNLTEIPEAQIHEGFQELLR	HexNAc7Hex8Fuc@14	glycopepnew_HCDEThcDiTCIDpeptide_EThcDpd2	69.683	2	20618	34.6	1.6e-14	1	46736.9	HUMAN	Alpha-1-antitrypsin
[1]		P01009	129	1370.19	5	-1.4	ADTHDEILEGLNFNLTEIPEAQIHEGFQELLR	HexNAc7Hex8FucNeuAc@14	glycopepnew_HCDEThcDiTCIDpeptide_EThcDpd2	68.717	2	20304	18.2	0.00012	1	46736.9	HUMAN	Alpha-1-antitrypsin
[1]		P01009	129	1377.79	5	-0.87	ADTHDEILEGLNFNLTEIPEAQIHEGFQELLR	HexNAc7Hex8FucNeuAc+Cation:K@14	glycopepnew_HCDEThcDiTCIDpeptide_EThcDpd2	62.75	1	18424	53.8	1.2e-18	1	46736.9	HUMAN	Alpha-1-antitrypsin
[1]		P01009	129	1340.98	5	-2.4	ADTHDEILEGLNFNLTEIPEAQIHEGFQELLR	HexNAc7Hex8NeuAc@14	glycopepnew_HCDEThcDiTCIDpeptide_EThcDpd2	64.7	1	19033	24.2	2.5e-08	1	46736.9	HUMAN	Alpha-1-antitrypsin
[1]		P01009	129	1123.98	6	-2.3	ADTHDEILEGLNFNLTEIPEAQIHEGFQELLR	HexNAc7Hex8NeuAc+Cation:K@14	glycopepnew_HCDEThcDiTCIDpeptide_EThcDpd2	62.117	1	18225	44.4	4.5e-16	1	46736.9	HUMAN	Alpha-1-antitrypsin
[1]		P01009	129	1093.31	6	-2	ADTHDEILEGLNFNLTEIPEAQIHEGFQELLRTL	HexNAc6Hex5NeuAc2+Cation:K@14	glycopepnew_HCDEThcDiTCIDpeptide_EThcDpd2	62.267	1	18275	18.7	2.7e-06	1	46736.9	HUMAN	Alpha-1-antitrypsin
[1]		P01009	129	1338.18	5	-4.9	ADTHDEILEGLNFNLTEIPEAQIHEGFQELLRTLN	HexNAc6Hex6Fuc3+Cation:K@14	glycopepnew_HCDEThcDiTCIDpeptide_EThcDpd2	62.567	2	18370	22	8e-08	1	46736.9	HUMAN	Alpha-1-antitrypsin
[25]		Q14624	5	1109.99	4	0.64	AFITNFSMIIDGMTYPGIIK	HexNAc4Hex5NeuAc2@5	glycopepnew_HCDEThcDiTCIDpeptide_EThcDpd2	66.15	1	19494	43.7	5.5e-11	1	103358	HUMAN	Inter-alpha-trypsin inhibitor heavy chain H4
[25]		Q14624	5	1119.47	4	-1.2	AFITNFSMIIDGMTYPGIIK	HexNAc4Hex5NeuAc2+Cation:K@5=17	glycopepnew_HCDEThcDiTCIDpeptide_EThcDpd2	66.033	2	19459	51.7	2.9e-14	1	103358	HUMAN	Inter-alpha-trypsin inhibitor heavy chain H4
[9]		P00450	19	961.898	4	1.8	AGLQAFFQVQECNK	HexNAc4Hex5NeuAc2@13	glycopepnew_HCDEThcDiTCIDpeptide_EThcDpd2	46.767	1	13280	35.7	5.8e-12	1	122206	HUMAN	Ceruloplasmin
[9]		P00450	19	971.385	4	-0.52	AGLQAFFQVQECNK	HexNAc4Hex5NeuAc2+Cation:K@13	glycopepnew_HCDEThcDiTCIDpeptide_EThcDpd2	46.5	1	13188	50.2	7.1e-19	1	122206	HUMAN	Ceruloplasmin
[16]		P04217	10	1389.44	5	-5.3	AIFYETQPSLWAESESLLKPLANVTLTCQAHLETPDFQLFK	HexNAc4Hex5Fuc4@23=12	glycopepnew_HCDEThcDiTCIDpeptide_EThcDpd2	59.617	1	17399	38.6	2.6e-11	1	54254	HUMAN	Alpha-1B-glycoprotein
[3]		P00738	93	1155.52	4	2	AKMVSHHNLTTGATLINEQWLLTTAK	HexNAc2Hex8+Cation:K@8	glycopepnew_HCDEThcDiTCIDpeptide_EThcDpd2	41.483	1	11496	14.6	3.8e-05	1	45205.7	HUMAN	Haptoglobin
[2]		P01876	118	1284.26	3	-2.8	ALEDLLLGSEANLTCTLTGLR	HexNAc4Hex3Fuc2@12	glycopepnew_HCDEThcDiTCIDpeptide_EThcDpd2	48.2	1	13736	18.5	2e-05	2	37655	HUMAN	Immunoglobulin heavy constant alpha 1
[7]		P02790	34	913.145	4	0.78	ALPQPQNVTSLLGCTH	HexNAc4Hex5NeuAc@7	glycopepnew_HCDEThcDiTCIDpeptide_EThcDpd2	40.483	1	11151	32.4	4.7e-13	1	51676.8	HUMAN	Hemopexin
[7]		P02790	34	922.632	4	-1.3	ALPQPQNVTSLLGCTH	HexNAc4Hex5NeuAc+Cation:K@7	glycopepnew_HCDEThcDiTCIDpeptide_EThcDpd2	40.533	2	11174	36	2.8e-11	1	51676.8	HUMAN	Hemopexin
[7]		P02790	34	985.92	4	1.7	ALPQPQNVTSLLGCTH	HexNAc4Hex5NeuAc2@7	glycopepnew_HCDEThcDiTCIDpeptide_EThcDpd2	46.967	3	13347	41.5	6.1e-14	1	51676.8	HUMAN	Hemopexin
[7]		P02790	34	995.406	4	-1.5	ALPQPQNVTSLLGCTH	HexNAc4Hex5NeuAc2+Cation:K@7	glycopepnew_HCDEThcDiTCIDpeptide_EThcDpd2	47.25	1	13423	42	5.3e-13	1	51676.8	HUMAN	Hemopexin
[6]		P02763	69	1170.75	4	-6.2	ANLVPVPITNATLDQITGK	HexNAc6Hex9+Cation:K@10	glycopepnew_HCDEThcDiTCIDpeptide_EThcDpd2	57.95	1	16869	13	0.00014	1	23511.8	HUMAN	Alpha-1-acid glycoprotein 1
[11]		P08185	21	1105.97	4	-0.86	AQLLQGLGFNLTER	HexNAc5Hex6NeuAc3@10||HexNAc6Hex9Fuc+Cation:K@10	glycopepnew_HCDEThcDiTCIDpeptide_EThcDpd2	61.8	1	18114	37.8	5.6e-12	1	45141.3	HUMAN	Corticosteroid-binding globulin
[11]		P08185	21	1329.62	4	-5.2	AVLQLNEEGVDTAGSTGVTLNLTSKPIILR	HexNAc4Hex5Fuc2NeuAc@21	glycopepnew_HCDEThcDiTCIDpeptide_EThcDpd2	47.767	1	13601	31.2	1.7e-05	1	45141.3	HUMAN	Corticosteroid-binding globulin
[6]		P02763	69	1247.29	4	1.3	CANLVPVPITNATLDQITGK	HexNAc5Hex6NeuAc3@11=54	glycopepnew_HCDEThcDiTCIDpeptide_EThcDpd2	60	1	17526	28.5	2.7e-08	1	23511.8	HUMAN	Alpha-1-acid glycoprotein 1
[6]		P02763	69	1198.77	4	0.69	CANLVPVPITNATLDQITGK	HexNAc6Hex6Fuc3+Cation:K@11	glycopepnew_HCDEThcDiTCIDpeptide_EThcDpd2	48.783	3	13930	13.7	1.7e-05	1	23511.8	HUMAN	Alpha-1-acid glycoprotein 1
[6]		P02763	69	1166.25	4	-5.1	CANLVPVPITNATLDQITGK	HexNAc6Hex7Fuc+Cation:K@11	glycopepnew_HCDEThcDiTCIDpeptide_EThcDpd2	49.533	1	14177	10.5	4.2e-05	1	23511.8	HUMAN	Alpha-1-acid glycoprotein 1
[6]		P02763	69	1193.02	4	-0.45	CANLVPVPITNATLDQITGK	HexNAc6Hex7NeuAc@11	glycopepnew_HCDEThcDiTCIDpeptide_EThcDpd2	48.783	2	13928	19.8	3.2e-06	1	23511.8	HUMAN	Alpha-1-acid glycoprotein 1
[6]		P02763	69	1176.25	4	-2.5	CANLVPVPITNATLDQITGK	Pyro-carbamidomethyl@1;HexNAc7Hex7+Cation:K@11	glycopepnew_HCDEThcDiTCIDpeptide_EThcDpd2	58.033	1	16897	13.4	6.9e-05	1	23511.8	HUMAN	Alpha-1-acid glycoprotein 1
[6-1]	24	P19652	58	1200.49	4	0.45	CANLVPVPITNATLDR	HexNAc5Hex6FucNeuAc3+Cation:K@11	glycopepnew_HCDEThcDiTCIDpeptide_EThcDpd2	53.783	2	15553	31	6.5e-09	1	23602.8	HUMAN	Alpha-1-acid glycoprotein 2
[6-1]	24	P19652	58	1154.49	4	0.81	CANLVPVPITNATLDR	HexNAc5Hex6NeuAc3@11=52	glycopepnew_HCDEThcDiTCIDpeptide_EThcDpd2	54.167	1	15676	30.4	4.4e-07	1	23602.8	HUMAN	Alpha-1-acid glycoprotein 2
[19]		O75882	9	792.043	4	-2.4	CENLTTGK	HexNAc4Hex5NeuAc2+Cation:K@3=11	glycopepnew_HCDEThcDiTCIDpeptide_EThcDpd2	18.867	2	3924	16.1	3.6e-08	1	158538	HUMAN	Attractin
[4]		P02787	67	926.633	4	6.5	CGLVPVLAENYNK	HexNAc4Hex4FucNeuAc2+Cation:K@12	glycopepnew_HCDEThcDiTCIDpeptide_EThcDpd2	43.267	2	12117	38.1	2.2e-14	1	77064.7	HUMAN	Serotransferrin
[4]		P02787	67	921.392	4	0.25	CGLVPVLAENYNK	HexNAc4Hex5Fuc2NeuAc@12	glycopepnew_HCDEThcDiTCIDpeptide_EThcDpd2	44.117	1	12401	18.3	5.5e-06	1	77064.7	HUMAN	Serotransferrin
[4]		P02787	67	894.369	4	2.9	CGLVPVLAENYNK	HexNAc4Hex5FucNeuAc+Cation:K@12	glycopepnew_HCDEThcDiTCIDpeptide_EThcDpd2	36.2	1	9689	40.8	3.4e-15	1	77064.7	HUMAN	Serotransferrin
[4]		P02787	67	848.363	4	0.81	CGLVPVLAENYNK	HexNAc4Hex5NeuAc@12	glycopepnew_HCDEThcDiTCIDpeptide_EThcDpd2	36.417	1	9765	39.7	4.8e-13	1	77064.7	HUMAN	Serotransferrin
[4]		P02787	67	857.85	4	-1.6	CGLVPVLAENYNK	HexNAc4Hex5NeuAc+Cation:K@12=126	glycopepnew_HCDEThcDiTCIDpeptide_EThcDpd2	36.433	1	9767	38.1	9.2e-15	1	77064.7	HUMAN	Serotransferrin
[4]		P02787	67	921.139	4	2.3	CGLVPVLAENYNK	HexNAc4Hex5NeuAc2@12	glycopepnew_HCDEThcDiTCIDpeptide_EThcDpd2	43.067	1	12041	45.5	1.9e-14	1	77064.7	HUMAN	Serotransferrin
[4]		P02787	67	1240.49	3	-3.2	CGLVPVLAENYNK	HexNAc4Hex5NeuAc2+Cation:K@12	glycopepnew_HCDEThcDiTCIDpeptide_EThcDpd2	43.317	1	12133	24.5	1.1e-10	1	77064.7	HUMAN	Serotransferrin
[4]		P02787	67	949.133	4	-1.8	CGLVPVLAENYNK	HexNAc5Hex6NeuAc+Cation:K@12	glycopepnew_HCDEThcDiTCIDpeptide_EThcDpd2	35.933	1	9603	29.6	2.7e-09	1	77064.7	HUMAN	Serotransferrin
[4]		P02787	67	1012.42	4	1.5	CGLVPVLAENYNK	HexNAc5Hex6NeuAc2@12	glycopepnew_HCDEThcDiTCIDpeptide_EThcDpd2	43.017	2	12030	36.5	1.4e-12	1	77064.7	HUMAN	Serotransferrin
[4]		P02787	67	1021.91	4	-1.2	CGLVPVLAENYNK	HexNAc5Hex6NeuAc2+Cation:K@12	glycopepnew_HCDEThcDiTCIDpeptide_EThcDpd2	42.95	2	12003	45	2.3e-17	1	77064.7	HUMAN	Serotransferrin
[4]		P02787	67	1094.68	4	-0.84	CGLVPVLAENYNK	HexNAc5Hex6NeuAc3+Cation:K@12	glycopepnew_HCDEThcDiTCIDpeptide_EThcDpd2	53.117	1	15341	34.7	1.8e-12	1	77064.7	HUMAN	Serotransferrin
[4]		P02787	67	916.88	4	-0.25	CGLVPVLAENYNK	Pyro-carbamidomethyl@1;HexNAc4Hex5NeuAc2@12	glycopepnew_HCDEThcDiTCIDpeptide_EThcDpd2	63.233	2	18569	32	6.6e-12	1	77064.7	HUMAN	Serotransferrin
[4]		P02787	67	926.367	4	-2.3	CGLVPVLAENYNK	Pyro-carbamidomethyl@1;HexNAc4Hex5NeuAc2+Cation:K@12	glycopepnew_HCDEThcDiTCIDpeptide_EThcDpd2	63.383	1	18612	27.9	3.8e-10	1	77064.7	HUMAN	Serotransferrin
[4]		P02787	67	936.615	4	-4.3	CGLVPVLAENYNKSD	HexNAc2Hex10+Cation:K@12	glycopepnew_HCDEThcDiTCIDpeptide_EThcDpd2	43.2	1	12093	31.6	1.4e-12	1	77064.7	HUMAN	Serotransferrin
[4]		P02787	67	1090.94	4	1.4	CGLVPVLAENYNKSDNCE	HexNAc5Hex6NeuAc@12	glycopepnew_HCDEThcDiTCIDpeptide_EThcDpd2	52.067	2	14993	23.8	1.1e-08	1	77064.7	HUMAN	Serotransferrin
[4]		P02787	67	1012.67	4	2.2	CGLVPVLAENYNKSDNCED	HexNAc6Hex3Fuc@12	glycopepnew_HCDEThcDiTCIDpeptide_EThcDpd2	42.533	1	11861	19	2.7e-07	1	77064.7	HUMAN	Serotransferrin
[7]		P02790	34	1202.94	4	3.6	CSDGWSFDATTLDDN	HexNAc8Hex8Fuc+Cation:K@15	glycopepnew_HCDEThcDiTCIDpeptide_EThcDpd2	62.067	2	18209	16	1.2e-06	1	51676.8	HUMAN	Hemopexin
[7]		P02790	34	997.159	5	4.4	CSDGWSFDATTLDDNGTM	HexNAc6Hex7NeuAc2+Cation:K@15=28;Oxidation@18=19	glycopepnew_HCDEThcDiTCIDpeptide_EThcDpd2	61.75	1	18104	13	9e-05	1	51676.8	HUMAN	Hemopexin
[7]		P02790	34	1204.45	4	5.6	CSDGWSFDATTLDDNGTM	HexNAc6Hex8NeuAc@15=56;Oxidation@18=56	glycopepnew_HCDEThcDiTCIDpeptide_EThcDpd2	58.983	2	17209	22	7.8e-09	1	51676.8	HUMAN	Hemopexin
[7]		P02790	34	1364.51	4	5.4	CSDGWSFDATTLDDNGTM	HexNAc7Hex8FucNeuAc2@15;Oxidation@18=32	glycopepnew_HCDEThcDiTCIDpeptide_EThcDpd2	73.7	1	21916	16	3.1e-07	1	51676.8	HUMAN	Hemopexin
[7]		P02790	34	1189.46	4	4.3	CSDGWSFDATTLDDNGTMLFFK	HexNAc4Hex4FucNeuAc2+Cation:K@15=120	glycopepnew_HCDEThcDiTCIDpeptide_EThcDpd2	61.967	1	18168	62.9	3.1e-17	1	51676.8	HUMAN	Hemopexin
[7]		P02790	34	1184.22	4	-4.4	CSDGWSFDATTLDDNGTMLFFK	HexNAc4Hex5Fuc2NeuAc@15	glycopepnew_HCDEThcDiTCIDpeptide_EThcDpd2	62.767	1	18426	33.2	9.3e-10	1	51676.8	HUMAN	Hemopexin
[7]		P02790	34	1197.7	4	-5.2	CSDGWSFDATTLDDNGTMLFFK	HexNAc4Hex5Fuc2NeuAc+Cation:K@15=23;Oxidation@18=23	glycopepnew_HCDEThcDiTCIDpeptide_EThcDpd2	58.183	2	16953	32.8	1.1e-11	1	51676.8	HUMAN	Hemopexin
[7]		P02790	34	1220.48	4	-0.88	CSDGWSFDATTLDDNGTMLFFK	HexNAc4Hex5FucNeuAc2@15=76	glycopepnew_HCDEThcDiTCIDpeptide_EThcDpd2	61.817	1	18121	32.8	2.1e-13	1	51676.8	HUMAN	Hemopexin
[7]		P02790	34	1111.2	4	2.1	CSDGWSFDATTLDDNGTMLFFK	HexNAc4Hex5NeuAc@15=30	glycopepnew_HCDEThcDiTCIDpeptide_EThcDpd2	54.283	2	15719	35.8	5.8e-14	1	51676.8	HUMAN	Hemopexin
[7]		P02790	34	1120.68	4	-0.59	CSDGWSFDATTLDDNGTMLFFK	HexNAc4Hex5NeuAc+Cation:K@15=43	glycopepnew_HCDEThcDiTCIDpeptide_EThcDpd2	54.3	1	15721	68.6	4.3e-23	1	51676.8	HUMAN	Hemopexin
[7]		P02790	34	1187.96	4	-1.9	CSDGWSFDATTLDDNGTMLFFK	HexNAc4Hex5NeuAc2@15;Oxidation@18	glycopepnew_HCDEThcDiTCIDpeptide_EThcDpd2	58.25	2	16975	46.3	1.1e-17	1	51676.8	HUMAN	Hemopexin
[7]		P02790	34	1183.97	4	0.4	CSDGWSFDATTLDDNGTMLFFK	HexNAc4Hex5NeuAc2@15=127	glycopepnew_HCDEThcDiTCIDpeptide_EThcDpd2	61.883	2	18143	50.2	2.7e-18	1	51676.8	HUMAN	Hemopexin
[7]		P02790	34	1193.45	4	-1.9	CSDGWSFDATTLDDNGTMLFFK	HexNAc4Hex5NeuAc2+Cation:K@15=27	glycopepnew_HCDEThcDiTCIDpeptide_EThcDpd2	61.9	1	18148	66	2.9e-18	1	51676.8	HUMAN	Hemopexin
[7]		P02790	34	1207.96	4	-2.9	CSDGWSFDATTLDDNGTMLFFK	HexNAc5Hex4Fuc2NeuAc+Cation:K&Oxidation@(15&18)||HexNAc5Hex5FucNeuAc+Cation:K@15	glycopepnew_HCDEThcDiTCIDpeptide_EThcDpd2	49.717	2	14238	27.4	3.4e-09	1	51676.8	HUMAN	Hemopexin
[7]		P02790	34	1394.02	4	-2.2	CSDGWSFDATTLDDNGTMLFFK	HexNAc5Hex6FucNeuAc3+Cation:K@15	glycopepnew_HCDEThcDiTCIDpeptide_EThcDpd2	73.367	1	21812	11.6	1.4e-05	1	51676.8	HUMAN	Hemopexin
[7]		P02790	34	1189.2	4	-0.46	CSDGWSFDATTLDDNGTMLFFK	Pyro-carbamidomethyl@1;HexNAc2Hex11+Cation:K&Oxidation@(15&5)||HexNAc4Hex4FucNeuAc2+Cation:K&Oxidation@(15&5)||HexNAc4Hex5NeuAc2+Cation:K@15	glycopepnew_HCDEThcDiTCIDpeptide_EThcDpd2	80.233	2	23988	28.3	1.3e-08	1	51676.8	HUMAN	Hemopexin
[7]		P02790	34	1183.97	4	0.71	CSDGWSFDATTLDDNGTMLFFK	Pyro-carbamidomethyl@1;HexNAc4Hex5Fuc2NeuAc@15=23;Oxidation@18=23	glycopepnew_HCDEThcDiTCIDpeptide_EThcDpd2	75.633	1	22537	29.8	6.9e-11	1	51676.8	HUMAN	Hemopexin
[7]		P02790	34	1193.2	4	-1.7	CSDGWSFDATTLDDNGTMLFFK	Pyro-carbamidomethyl@1;HexNAc4Hex5NeuAc2+Cation:K@15;Oxidation@18=21	glycopepnew_HCDEThcDiTCIDpeptide_EThcDpd2	75.783	1	22586	12.3	8.4e-06	1	51676.8	HUMAN	Hemopexin
[7]		P02790	34	1193.97	4	0.75	CSDGWSFDATTLDDNGTMLFFK	Pyro-carbamidomethyl@1;HexNAc5Hex4NeuAc2@15;Oxidation@18=39	glycopepnew_HCDEThcDiTCIDpeptide_EThcDpd2	59.883	1	17489	23.2	9.7e-10	1	51676.8	HUMAN	Hemopexin
[7]		P02790	34	1201.45	4	-2.6	CSDGWSFDATTLDDNGTMLFFK	Pyro-carbamidomethyl@1=28;Oxidation@5=27;HexNAc4Hex7NeuAc+Cation:K@15=28	glycopepnew_HCDEThcDiTCIDpeptide_EThcDpd2	80.533	2	24070	10.8	9.8e-06	1	51676.8	HUMAN	Hemopexin
[7]		P02790	34	1198.72	4	-2.1	CSDGWSFDATTLDDNGTMLFFKG	HexNAc4Hex5Fuc4@15||HexNAc6Hex6&Oxidation@(15&18)	glycopepnew_HCDEThcDiTCIDpeptide_EThcDpd2	50.133	1	14359	19	3.8e-07	1	51676.8	HUMAN	Hemopexin
[7]		P02790	34	1363.76	4	-5.2	CSDGWSFDATTLDDNGTMLFFKGE	HexNAc5Hex5Fuc2NeuAc2+Cation:K@15	glycopepnew_HCDEThcDiTCIDpeptide_EThcDpd2	73.933	2	21997	16.3	4.6e-06	1	51676.8	HUMAN	Hemopexin
[7]		P02790	34	1348.27	4	-3.3	CSDGWSFDATTLDDNGTMLFFKGE	HexNAc9Hex4Fuc+Cation:K@15;Oxidation@18	glycopepnew_HCDEThcDiTCIDpeptide_EThcDpd2	73.433	1	21832	13	7.4e-05	1	51676.8	HUMAN	Hemopexin
[1]		P01009	129	1348.37	5	-4.5	DEILEGLNFNLTEIPEAQIHEGFQELLR	HexNAc9Hex9Fuc+Cation:K@10	glycopepnew_HCDEThcDiTCIDpeptide_EThcDpd2	62.283	2	18279	30	1.5e-10	1	46736.9	HUMAN	Alpha-1-antitrypsin
[20]		P43652	8	860.326	4	-1.1	DIENFNSTQK	HexNAc4Hex5NeuAc2+Cation:K@6	glycopepnew_HCDEThcDiTCIDpeptide_EThcDpd2	28.933	1	7269	39.5	1.1e-13	1	69069.8	HUMAN	Afamin
[21]		P25311	8	1104.95	4	2.3	DIVEYYNDSNGSHVLQGR	HexNAc4Hex5FucNeuAc2@7|10	glycopepnew_HCDEThcDiTCIDpeptide_EThcDpd2	34.117	1	8993	17.9	1.6e-06	1	34259	HUMAN	Zinc-alpha-2-glycoprotein
[21]		P25311	8	1077.93	4	-1.5	DIVEYYNDSNGSHVLQGR	HexNAc4Hex5NeuAc2+Cation:K@7=11	glycopepnew_HCDEThcDiTCIDpeptide_EThcDpd2	34.55	1	9130	37.6	6.4e-14	1	34259	HUMAN	Zinc-alpha-2-glycoprotein
[21]		P25311	8	1269.51	4	-5.7	DIVEYYNDSNGSHVLQGR	HexNAc7Hex8NeuAc@7|10	glycopepnew_HCDEThcDiTCIDpeptide_EThcDpd2	41.367	2	11460	17.4	0.00012	1	34259	HUMAN	Zinc-alpha-2-glycoprotein
[28]		P19827	4	1076.47	5	-3.1	DKICDLLVANNHFAHFFAPQNLTNMNK	HexNAc4Hex5Fuc2NeuAc@21	glycopepnew_HCDEThcDiTCIDpeptide_EThcDpd2	44.65	1	12574	34.4	2.9e-11	1	101390	HUMAN	Inter-alpha-trypsin inhibitor heavy chain H1
[5]		P01023	66	1013.64	5	-6.5	DKVSNQTLSLFFTVLQDVPVR	HexNAc5Hex9Fuc+Cation:K@5	glycopepnew_HCDEThcDiTCIDpeptide_EThcDpd2	77.383	2	23094	12.4	6.9e-06	1	163292	HUMAN	Alpha-2-macroglobulin
[1]		P01009	129	1308.17	5	8	DTHDEILEGLNFNLTEIPEAQIHEGFQELLR	HexNAc5Hex7FucNeuAc2+Cation:K@13	glycopepnew_HCDEThcDiTCIDpeptide_EThcDpd2	58.2	1	16959	17.8	7.3e-06	1	46736.9	HUMAN	Alpha-1-antitrypsin
[1]		P01009	129	1311.77	5	4.1	DTHDEILEGLNFNLTEIPEAQIHEGFQELLR	HexNAc5Hex8Fuc4+Cation:K@13	glycopepnew_HCDEThcDiTCIDpeptide_EThcDpd2	73.333	1	21801	19	3.5e-06	1	46736.9	HUMAN	Alpha-1-antitrypsin
[1]		P01009	129	1287.36	5	4.5	DTHDEILEGLNFNLTEIPEAQIHEGFQELLR	HexNAc6Hex6Fuc2NeuAc+Cation:K@13	glycopepnew_HCDEThcDiTCIDpeptide_EThcDpd2	57.533	1	16742	16.8	4.1e-05	1	46736.9	HUMAN	Alpha-1-antitrypsin
[1]		P01009	129	1341.18	5	-3.5	DTHDEILEGLNFNLTEIPEAQIHEGFQELLR	HexNAc6Hex7FucNeuAc2@13	glycopepnew_HCDEThcDiTCIDpeptide_EThcDpd2	57.367	2	16697	20.4	4.4e-07	1	46736.9	HUMAN	Alpha-1-antitrypsin
[1]		P01009	129	1348.77	5	0.2	DTHDEILEGLNFNLTEIPEAQIHEGFQELLR	HexNAc6Hex7FucNeuAc2+Cation:K@13	glycopepnew_HCDEThcDiTCIDpeptide_EThcDpd2	63.85	1	18765	15.8	4.2e-06	1	46736.9	HUMAN	Alpha-1-antitrypsin
[1]		P01009	129	1299.74	7	5.2	DTHDEILEGLNFNLTEIPEAQIHEGFQELLRTLNQPDSQLQLTTGNGLFLSEGLK	HexNAc5Hex7FucNeuAc2+Cation:K@13	glycopepnew_HCDEThcDiTCIDpeptide_EThcDpd2	68.167	1	20127	15	1.2e-05	1	46736.9	HUMAN	Alpha-1-antitrypsin
[47]		P43251	1	890.173	5	-1.4	DVQIIVFPEDGIHGFNFTR	HexNAc4Hex5NeuAc2+Cation:K@16	glycopepnew_HCDEThcDiTCIDpeptide_EThcDpd2	54.267	1	15709	41	1.7e-11	1	61133.5	HUMAN	Biotinidase
[10-1]	16	P01859	20	804.301	4	-1.3	EEQFNSTFR	HexNAc3Hex6FucNeuAc+Cation:K@5	glycopepnew_HCDEThcDiTCIDpeptide_EThcDpd2	24.467	1	5824	20.6	5.7e-08	1	35901	HUMAN	Immunoglobulin heavy constant gamma 2
[10-1]	16	P01859	20	819.34	3	3.2	EEQFNSTFR	HexNAc4Hex3@5	glycopepnew_HCDEThcDiTCIDpeptide_EThcDpd2	20.283	2	4421	19.2	2.3e-05	1	35901	HUMAN	Immunoglobulin heavy constant gamma 2
[10-1]	16	P01859	20	868.024	3	0.38	EEQFNSTFR	HexNAc4Hex3Fuc@5	glycopepnew_HCDEThcDiTCIDpeptide_EThcDpd2	20.583	2	4526	19.7	0.0002	1	35901	HUMAN	Immunoglobulin heavy constant gamma 2
[10-1]	16	P01859	20	886.009	3	1.9	EEQFNSTFR	HexNAc4Hex4+Cation:K@5	glycopepnew_HCDEThcDiTCIDpeptide_EThcDpd2	20.05	1	4329	17.3	7.6e-05	1	35901	HUMAN	Immunoglobulin heavy constant gamma 2
[10-1]	16	P01859	20	701.27	4	-2.5	EEQFNSTFR	HexNAc4Hex4Fuc+Cation:K@5	glycopepnew_HCDEThcDiTCIDpeptide_EThcDpd2	22.033	1	5016	22.7	1.2e-08	1	35901	HUMAN	Immunoglobulin heavy constant gamma 2
[10-1]	16	P01859	20	774.044	4	-1.5	EEQFNSTFR	HexNAc4Hex4FucNeuAc+Cation:K@5	glycopepnew_HCDEThcDiTCIDpeptide_EThcDpd2	24.65	1	5884	28.1	9.3e-07	1	35901	HUMAN	Immunoglobulin heavy constant gamma 2
[10-1]	16	P01859	20	976.059	3	0.15	EEQFNSTFR	HexNAc4Hex5Fuc@5	glycopepnew_HCDEThcDiTCIDpeptide_EThcDpd2	20.167	1	4375	18.8	1.6e-07	1	35901	HUMAN	Immunoglobulin heavy constant gamma 2
[10-1]	16	P01859	20	741.784	4	-1.6	EEQFNSTFR	HexNAc4Hex5Fuc+Cation:K@5	glycopepnew_HCDEThcDiTCIDpeptide_EThcDpd2	19.683	1	4203	22.9	6.1e-05	1	35901	HUMAN	Immunoglobulin heavy constant gamma 2
[10-1]	16	P01859	20	814.557	4	-1.9	EEQFNSTFR	HexNAc4Hex5FucNeuAc+Cation:K@5	glycopepnew_HCDEThcDiTCIDpeptide_EThcDpd2	23.617	1	5540	25.9	1.5e-10	1	35901	HUMAN	Immunoglobulin heavy constant gamma 2
[10-1]	16	P01859	20	989.735	3	0.48	EEQFNSTFR	HexNAc5Hex4Fuc@5	glycopepnew_HCDEThcDiTCIDpeptide_EThcDpd2	20.2	2	4392	15.2	9.4e-06	1	35901	HUMAN	Immunoglobulin heavy constant gamma 2
[10-1]	16	P01859	20	752.04	4	-1.5	EEQFNSTFR	HexNAc5Hex4Fuc+Cation:K@5	glycopepnew_HCDEThcDiTCIDpeptide_EThcDpd2	19.45	1	4123	31.2	2.6e-06	1	35901	HUMAN	Immunoglobulin heavy constant gamma 2
[10-1]	16	P01859	20	792.553	4	-1.9	EEQFNSTFR	HexNAc5Hex5Fuc+Cation:K@5	glycopepnew_HCDEThcDiTCIDpeptide_EThcDpd2	19.95	2	4299	30.4	0.00011	1	35901	HUMAN	Immunoglobulin heavy constant gamma 2
[10-2]	11	P01861	12	873.355	3	-0.43	EEQFNSTYR	HexNAc4Hex3Fuc@5	glycopepnew_HCDEThcDiTCIDpeptide_EThcDpd2	17.05	1	3293	20.3	2.4e-09	1	35940.9	HUMAN	Immunoglobulin heavy constant gamma 4
[10-2]	11	P01861	12	927.372	3	-0.37	EEQFNSTYR	HexNAc4Hex4Fuc@5	glycopepnew_HCDEThcDiTCIDpeptide_EThcDpd2	17.133	2	3327	24.3	7.7e-10	1	35940.9	HUMAN	Immunoglobulin heavy constant gamma 4
[10-2]	11	P01861	12	778.043	4	-1.9	EEQFNSTYR	HexNAc4Hex4FucNeuAc+Cation:K@5	glycopepnew_HCDEThcDiTCIDpeptide_EThcDpd2	20.333	1	4435	12.5	3.7e-06	1	35940.9	HUMAN	Immunoglobulin heavy constant gamma 4
[10-2]	11	P01861	12	745.782	4	-2.2	EEQFNSTYR	HexNAc4Hex5Fuc+Cation:K@5	glycopepnew_HCDEThcDiTCIDpeptide_EThcDpd2	16.717	1	3174	25.7	3.2e-10	1	35940.9	HUMAN	Immunoglobulin heavy constant gamma 4
[10-2]	11	P01861	12	1083.75	3	-0.61	EEQFNSTYR	HexNAc4Hex6NeuAc@5	glycopepnew_HCDEThcDiTCIDpeptide_EThcDpd2	17.1	2	3313	15.6	2.3e-05	1	35940.9	HUMAN	Immunoglobulin heavy constant gamma 4
[10-2]	11	P01861	12	941.048	3	0.047	EEQFNSTYR	HexNAc5Hex3Fuc@5	glycopepnew_HCDEThcDiTCIDpeptide_EThcDpd2	17.15	1	3329	10	1.6e-05	1	35940.9	HUMAN	Immunoglobulin heavy constant gamma 4
[10-2]	11	P01861	12	995.066	3	-0.42	EEQFNSTYR	HexNAc5Hex4Fuc@5	glycopepnew_HCDEThcDiTCIDpeptide_EThcDpd2	17.083	1	3304	15.1	2.6e-06	1	35940.9	HUMAN	Immunoglobulin heavy constant gamma 4
[10-2]	11	P01861	12	756.038	4	-3	EEQFNSTYR	HexNAc5Hex4Fuc+Cation:K@5	glycopepnew_HCDEThcDiTCIDpeptide_EThcDpd2	17	1	3273	34.2	1.4e-11	1	35940.9	HUMAN	Immunoglobulin heavy constant gamma 4
[10]		P01857	23	877.659	3	-4.6	EEQYNSTYR	HexNAc3Hex4Fuc+Cation:K@5	glycopepnew_HCDEThcDiTCIDpeptide_EThcDpd2	15.183	3	2622	20.9	2.1e-05	1	36106.2	HUMAN	Immunoglobulin heavy constant gamma 1
[10]		P01857	23	830	3	-0.8	EEQYNSTYR	HexNAc4Hex3@5	glycopepnew_HCDEThcDiTCIDpeptide_EThcDpd2	15.383	1	2696	31.2	1.9e-07	1	36106.2	HUMAN	Immunoglobulin heavy constant gamma 1
[10]		P01857	23	878.687	3	-0.045	EEQYNSTYR	HexNAc4Hex3Fuc@5	glycopepnew_HCDEThcDiTCIDpeptide_EThcDpd2	15.367	1	2689	18.3	1.3e-08	1	36106.2	HUMAN	Immunoglobulin heavy constant gamma 1
[10]		P01857	23	884.017	3	-1.5	EEQYNSTYR	HexNAc4Hex4@5	glycopepnew_HCDEThcDiTCIDpeptide_EThcDpd2	15.25	1	2641	24	6.3e-05	1	36106.2	HUMAN	Immunoglobulin heavy constant gamma 1
[10]		P01857	23	896.668	3	-2.9	EEQYNSTYR	HexNAc4Hex4+Cation:K@5	glycopepnew_HCDEThcDiTCIDpeptide_EThcDpd2	15.317	2	2670	15.6	4.5e-07	1	36106.2	HUMAN	Immunoglobulin heavy constant gamma 1
[10]		P01857	23	932.704	3	-0.73	EEQYNSTYR	HexNAc4Hex4Fuc@5	glycopepnew_HCDEThcDiTCIDpeptide_EThcDpd2	15.117	2	2596	11.7	6.1e-05	1	36106.2	HUMAN	Immunoglobulin heavy constant gamma 1
[10]		P01857	23	709.267	4	-2.4	EEQYNSTYR	HexNAc4Hex4Fuc+Cation:K@5	glycopepnew_HCDEThcDiTCIDpeptide_EThcDpd2	15.033	1	2567	13.6	3.1e-05	1	36106.2	HUMAN	Immunoglobulin heavy constant gamma 1
[10]		P01857	23	713.266	4	-3.2	EEQYNSTYR	HexNAc4Hex5+Cation:K@5	glycopepnew_HCDEThcDiTCIDpeptide_EThcDpd2	15.2	1	2628	22.7	4.6e-09	1	36106.2	HUMAN	Immunoglobulin heavy constant gamma 1
[10]		P01857	23	986.723	3	0.58	EEQYNSTYR	HexNAc4Hex5Fuc@5	glycopepnew_HCDEThcDiTCIDpeptide_EThcDpd2	15.133	2	2601	20.6	1.3e-06	1	36106.2	HUMAN	Immunoglobulin heavy constant gamma 1
[10]		P01857	23	749.78	4	-3.3	EEQYNSTYR	HexNAc4Hex5Fuc+Cation:K@5	glycopepnew_HCDEThcDiTCIDpeptide_EThcDpd2	15.217	1	2630	26.6	3.7e-06	1	36106.2	HUMAN	Immunoglobulin heavy constant gamma 1
[10]		P01857	23	1083.75	3	-0.61	EEQYNSTYR	HexNAc4Hex5FucNeuAc@5	glycopepnew_HCDEThcDiTCIDpeptide_EThcDpd2	17.1	2	3313	15.6	2.3e-05	1	36106.2	HUMAN	Immunoglobulin heavy constant gamma 1
[10]		P01857	23	822.555	4	-1.4	EEQYNSTYR	HexNAc4Hex5FucNeuAc+Cation:K@5	glycopepnew_HCDEThcDiTCIDpeptide_EThcDpd2	17.567	1	3473	23.1	2.6e-06	1	36106.2	HUMAN	Immunoglobulin heavy constant gamma 1
[10]		P01857	23	895.328	4	-1.9	EEQYNSTYR	HexNAc4Hex5FucNeuAc2+Cation:K@5	glycopepnew_HCDEThcDiTCIDpeptide_EThcDpd2	20.867	1	4627	10.3	9.7e-05	1	36106.2	HUMAN	Immunoglobulin heavy constant gamma 1
[10]		P01857	23	719.524	4	-2.7	EEQYNSTYR	HexNAc5Hex3Fuc+Cation:K@5	glycopepnew_HCDEThcDiTCIDpeptide_EThcDpd2	15.517	2	2748	24.4	2e-08	1	36106.2	HUMAN	Immunoglobulin heavy constant gamma 1
[10]		P01857	23	1000.4	3	-0.26	EEQYNSTYR	HexNAc5Hex4Fuc@5	glycopepnew_HCDEThcDiTCIDpeptide_EThcDpd2	15.417	1	2708	20	4.8e-08	1	36106.2	HUMAN	Immunoglobulin heavy constant gamma 1
[16]		P04217	10	1208.9	5	-0.88	EGDHEFLEVPEAQEDVEATFPVHQPGNYSCSYRTD	HexNAc5Hex6@27	glycopepnew_HCDEThcDiTCIDpeptide_EThcDpd2	42.083	1	11698	36.4	7.4e-13	1	54254	HUMAN	Alpha-1B-glycoprotein
[16]		P04217	10	1337.74	5	-7.7	EGDHEFLEVPEAQEDVEATFPVHQPGNYSCSYRTDGEGAL	HexNAc4Hex5NeuAc2@27	glycopepnew_HCDEThcDiTCIDpeptide_EThcDpd2	41.55	1	11518	16	1.2e-05	1	54254	HUMAN	Alpha-1B-glycoprotein
[9]		P00450	19	959.365	5	-3.2	EHEGAIYPDNTT	HexNAc7Hex8FucNeuAc2@10	glycopepnew_HCDEThcDiTCIDpeptide_EThcDpd2	33.483	1	8778	16.6	8.8e-05	1	122206	HUMAN	Ceruloplasmin
[9]		P00450	19	1225.73	4	0.33	EHEGAIYPDNTTDFQR	HexNAc5Hex6FucNeuAc3@10	glycopepnew_HCDEThcDiTCIDpeptide_EThcDpd2	34	1	8953	16.9	1.2e-05	1	122206	HUMAN	Ceruloplasmin
[9]		P00450	19	1198.7	4	-2.3	EHEGAIYPDNTTDFQR	HexNAc5Hex6NeuAc3+Cation:K@10	glycopepnew_HCDEThcDiTCIDpeptide_EThcDpd2	33.683	2	8845	45	5.5e-10	1	122206	HUMAN	Ceruloplasmin
[9]		P00450	19	1017.99	5	-2.1	EHEGAIYPDNTTDFQR	HexNAc7Hex8FucNeuAc+Cation:K@10	glycopepnew_HCDEThcDiTCIDpeptide_EThcDpd2	33.367	1	8734	17.6	3.4e-06	1	122206	HUMAN	Ceruloplasmin
[9]		P00450	19	882.963	5	-0.96	ELHHLQEQNVSNAFLDK	HexNAc2Hex12+Cation:K@9||HexNAc4Hex5FucNeuAc2+Cation:K@9	glycopepnew_HCDEThcDiTCIDpeptide_EThcDpd2	28.017	1	6979	57.2	7.1e-23	1	122206	HUMAN	Ceruloplasmin
[9]		P00450	19	1057.7	4	-7.1	ELHHLQEQNVSNAFLDK	HexNAc4Hex5Fuc2NeuAc@9	glycopepnew_HCDEThcDiTCIDpeptide_EThcDpd2	27.2	1	6709	35.1	5.1e-12	1	122206	HUMAN	Ceruloplasmin
[9]		P00450	19	1094.21	4	-2.9	ELHHLQEQNVSNAFLDK	HexNAc4Hex5Fuc3NeuAc@9||HexNAc9Hex3+Cation:K@9	glycopepnew_HCDEThcDiTCIDpeptide_EThcDpd2	29.217	1	7361	37.8	1.8e-12	1	122206	HUMAN	Ceruloplasmin
[9]		P00450	19	1093.96	4	-1.1	ELHHLQEQNVSNAFLDK	HexNAc4Hex5FucNeuAc2@9	glycopepnew_HCDEThcDiTCIDpeptide_EThcDpd2	28.3	2	7071	47	1.4e-13	1	122206	HUMAN	Ceruloplasmin
[9]		P00450	19	795.532	5	-1.7	ELHHLQEQNVSNAFLDK	HexNAc4Hex5NeuAc+Cation:K@9	glycopepnew_HCDEThcDiTCIDpeptide_EThcDpd2	24.85	1	5962	50.8	3e-16	1	122206	HUMAN	Ceruloplasmin
[9]		P00450	19	1057.45	4	1.3	ELHHLQEQNVSNAFLDK	HexNAc4Hex5NeuAc2@9	glycopepnew_HCDEThcDiTCIDpeptide_EThcDpd2	28.3	1	7069	58.6	3.2e-21	1	122206	HUMAN	Ceruloplasmin
[9]		P00450	19	1185.25	4	-0.93	ELHHLQEQNVSNAFLDK	HexNAc5Hex6FucNeuAc2@9	glycopepnew_HCDEThcDiTCIDpeptide_EThcDpd2	27.767	1	6904	31.5	1.9e-09	1	122206	HUMAN	Ceruloplasmin
[6]		P02763	69	919.59	4	-1.8	ENGTISR	HexNAc5Hex6NeuAc3+Cation:K@2	glycopepnew_HCDEThcDiTCIDpeptide_EThcDpd2	22.383	1	5131	32.2	3e-06	1	23511.8	HUMAN	Alpha-1-acid glycoprotein 1
[6]		P02763	69	1047.39	4	-2.1	ENGTISR	HexNAc6Hex7FucNeuAc3+Cation:K@2	glycopepnew_HCDEThcDiTCIDpeptide_EThcDpd2	20.917	2	4643	16.3	0.00015	1	23511.8	HUMAN	Alpha-1-acid glycoprotein 1
[6]		P02763	69	1010.88	4	0.32	ENGTISR	HexNAc6Hex7NeuAc3+Cation:K@2	glycopepnew_HCDEThcDiTCIDpeptide_EThcDpd2	20.817	1	4607	22.9	3.4e-08	1	23511.8	HUMAN	Alpha-1-acid glycoprotein 1
[6]		P02763	69	1083.65	4	-0.19	ENGTISR	HexNAc6Hex7NeuAc4+Cation:K@2	glycopepnew_HCDEThcDiTCIDpeptide_EThcDpd2	31.917	1	8255	25.9	1.6e-05	1	23511.8	HUMAN	Alpha-1-acid glycoprotein 1
[6-1]	24	P19652	58	952.6	4	-2.2	ENGTVSR	HexNAc5Hex6FucNeuAc3+Cation:K@2	glycopepnew_HCDEThcDiTCIDpeptide_EThcDpd2	18.567	1	3821	16.8	9.3e-06	1	23602.8	HUMAN	Alpha-1-acid glycoprotein 2
[6-1]	24	P19652	58	906.599	4	-0.05	ENGTVSR	HexNAc5Hex6NeuAc3@2	glycopepnew_HCDEThcDiTCIDpeptide_EThcDpd2	18.433	1	3773	17.8	1e-07	1	23602.8	HUMAN	Alpha-1-acid glycoprotein 2
[6-1]	24	P19652	58	916.087	4	-1.4	ENGTVSR	HexNAc5Hex6NeuAc3+Cation:K@2	glycopepnew_HCDEThcDiTCIDpeptide_EThcDpd2	18.883	2	3931	25.5	1.7e-09	1	23602.8	HUMAN	Alpha-1-acid glycoprotein 2
[6-1]	24	P19652	58	1007.37	4	0.21	ENGTVSR	HexNAc6Hex7NeuAc3+Cation:K@2	glycopepnew_HCDEThcDiTCIDpeptide_EThcDpd2	18.333	3	3743	29.4	2.2e-07	1	23602.8	HUMAN	Alpha-1-acid glycoprotein 2
[36]		P01591	3	905.105	4	-1.4	ENISDPTSPLR	HexNAc4Hex5FucNeuAc2+Cation:K@2	glycopepnew_HCDEThcDiTCIDpeptide_EThcDpd2	32.567	2	8464	34.1	3.8e-12	1	18098.8	HUMAN	Immunoglobulin J chain
[9]		P00450	19	1083.95	4	-1.4	ENLTAPGSDSAVFFEQGTTR	HexNAc4Hex5Fuc2NeuAc@2	glycopepnew_HCDEThcDiTCIDpeptide_EThcDpd2	44.85	2	12640	19.6	4.2e-06	1	122206	HUMAN	Ceruloplasmin
[9]		P00450	19	1084.2	4	-7.2	ENLTAPGSDSAVFFEQGTTR	HexNAc4Hex5Fuc4@2	glycopepnew_HCDEThcDiTCIDpeptide_EThcDpd2	44.367	1	12477	31.3	2.8e-07	1	122206	HUMAN	Ceruloplasmin
[9]		P00450	19	1083.7	4	0.62	ENLTAPGSDSAVFFEQGTTR	HexNAc4Hex5NeuAc2@2	glycopepnew_HCDEThcDiTCIDpeptide_EThcDpd2	44.483	1	12509	56.1	6.6e-16	1	122206	HUMAN	Ceruloplasmin
[9]		P00450	19	1093.19	4	-0.0034	ENLTAPGSDSAVFFEQGTTR	HexNAc4Hex5NeuAc2+Cation:K@2	glycopepnew_HCDEThcDiTCIDpeptide_EThcDpd2	44.683	2	12585	27.7	9.9e-08	1	122206	HUMAN	Ceruloplasmin
[28]		P19827	4	1259.8	4	-1.8	ERANLSSQALQMSLDYGFVTPLTSMSIR	HexNAc6Hex4+Cation:K@4=54;Oxidation@12=54	glycopepnew_HCDEThcDiTCIDpeptide_EThcDpd2	62.55	1	18362	28.5	4.4e-06	1	101390	HUMAN	Inter-alpha-trypsin inhibitor heavy chain H1
[38]		P04070	2	856.852	4	1	EVFVHPNYSK	HexNAc4Hex5NeuAc2@7	glycopepnew_HCDEThcDiTCIDpeptide_EThcDpd2	24.667	2	5890	33.5	4.9e-12	1	52071.8	HUMAN	Vitamin K-dependent protein C
[38]		P04070	2	866.34	4	-0.25	EVFVHPNYSK	HexNAc4Hex5NeuAc2+Cation:K@7	glycopepnew_HCDEThcDiTCIDpeptide_EThcDpd2	22.117	1	5040	37.3	1.1e-13	1	52071.8	HUMAN	Vitamin K-dependent protein C
[1]		P01009	129	1176.56	5	7.2	FAMLSLGTKADTHDEILEGLNFNLTEIPEAQIHEGFQELLR	HexNAc2Hex3Fuc2+Cation:K&Oxidation@(23&3)||HexNAc2Hex4Fuc+Cation:K@23	glycopepnew_HCDEThcDiTCIDpeptide_EThcDpd2	53.35	1	15417	15	1.6e-05	1	46736.9	HUMAN	Alpha-1-antitrypsin
[21]		P25311	8	846.061	4	-0.17	FGCEIENNR	HexNAc4Hex5NeuAc2+Cation:K@8	glycopepnew_HCDEThcDiTCIDpeptide_EThcDpd2	24.667	1	5886	32	4.2e-11	1	34259	HUMAN	Zinc-alpha-2-glycoprotein
[30]		P05156	4	816.562	4	-2.6	FLNNGTCTAEGK	HexNAc4Hex5NeuAc+Cation:K@4	glycopepnew_HCDEThcDiTCIDpeptide_EThcDpd2	18.883	1	3929	18	5.2e-05	1	65751	HUMAN	Complement factor I
[30]		P05156	4	889.336	4	-1.7	FLNNGTCTAEGK	HexNAc4Hex5NeuAc2+Cation:K@4	glycopepnew_HCDEThcDiTCIDpeptide_EThcDpd2	23.567	1	5523	42.1	1.3e-15	1	65751	HUMAN	Complement factor I
[20]		P43652	8	778.538	4	-1.5	FNETTEK	HexNAc4Hex5NeuAc2+Cation:K@2	glycopepnew_HCDEThcDiTCIDpeptide_EThcDpd2	18.167	2	3674	27.8	5e-06	1	69069.8	HUMAN	Afamin
[17]		P01011	12	1192.08	5	-4	FNLTETSEAEIHQSFQHLLR	HexNAc6Hex7Fuc2NeuAc3+Cation:K@2	glycopepnew_HCDEThcDiTCIDpeptide_EThcDpd2	52.05	1	14983	15.8	2.6e-05	1	47651.3	HUMAN	Alpha-1-antichymotrypsin
[16]		P04217	10	1367.61	5	0.59	FQSPAGTEALFELHNISVADSANYSCVYVDLKPPFGGSAPSER	HexNAc4Hex5Fuc2NeuAc@23=17	glycopepnew_HCDEThcDiTCIDpeptide_EThcDpd2	50.517	1	14486	54.4	1.7e-14	1	54254	HUMAN	Alpha-1B-glycoprotein
[9]		P00450	19	824.557	4	-1.1	FQVQECNK	HexNAc4Hex5NeuAc2+Cation:K@7	glycopepnew_HCDEThcDiTCIDpeptide_EThcDpd2	21.9	1	4971	23.5	6e-09	1	122206	HUMAN	Ceruloplasmin
[17]		P01011	12	1019.12	6	1.5	FSPLSISTALAFLSLGAHNTTLTEILK	HexNAc6Hex7NeuAc3+Cation:K@19	glycopepnew_HCDEThcDiTCIDpeptide_EThcDpd2	76.95	1	22957	15.2	1.4e-06	1	47651.3	HUMAN	Alpha-1-antichymotrypsin
[29]		P05543	4	920.356	4	-6	FSTDFSNISAAK	HexNAc6Hex7+Cation:K@7	glycopepnew_HCDEThcDiTCIDpeptide_EThcDpd2	26.55	3	6507	10.9	0.0002	1	46324.9	HUMAN	Thyroxine-binding globulin
[5]		P01023	66	1151.51	4	-3.4	GCVLLSYLNETVTVSASLESVR	HexNAc4Hex5Fuc2NeuAc@9	glycopepnew_HCDEThcDiTCIDpeptide_EThcDpd2	76.417	1	22793	33.3	1.3e-09	1	163292	HUMAN	Alpha-2-macroglobulin
[5]		P01023	66	1115.24	4	-6.9	GCVLLSYLNETVTVSASLESVR	HexNAc4Hex5Fuc3@9	glycopepnew_HCDEThcDiTCIDpeptide_EThcDpd2	54.517	1	15791	29	1.9e-07	1	163292	HUMAN	Alpha-2-macroglobulin
[5]		P01023	66	1124.74	4	-3.4	GCVLLSYLNETVTVSASLESVR	HexNAc4Hex5Fuc3+Cation:K@9	glycopepnew_HCDEThcDiTCIDpeptide_EThcDpd2	54.417	1	15762	32.8	4.9e-10	1	163292	HUMAN	Alpha-2-macroglobulin
[5]		P01023	66	1188.02	4	-2.3	GCVLLSYLNETVTVSASLESVR	HexNAc4Hex5Fuc3NeuAc@9||HexNAc9Hex3+Cation:K@9	glycopepnew_HCDEThcDiTCIDpeptide_EThcDpd2	69.967	2	20708	33	2.5e-09	1	163292	HUMAN	Alpha-2-macroglobulin
[5]		P01023	66	1151.76	4	-7.5	GCVLLSYLNETVTVSASLESVR	HexNAc4Hex5Fuc4@9	glycopepnew_HCDEThcDiTCIDpeptide_EThcDpd2	74.8	1	22274	31.1	4.6e-08	1	163292	HUMAN	Alpha-2-macroglobulin
[5]		P01023	66	1187.77	4	3	GCVLLSYLNETVTVSASLESVR	HexNAc4Hex5FucNeuAc2@9	glycopepnew_HCDEThcDiTCIDpeptide_EThcDpd2	69.183	1	20454	24.6	5.2e-07	1	163292	HUMAN	Alpha-2-macroglobulin
[5]		P01023	66	1087.98	4	4.4	GCVLLSYLNETVTVSASLESVR	HexNAc4Hex5NeuAc+Cation:K@9	glycopepnew_HCDEThcDiTCIDpeptide_EThcDpd2	71.267	1	21139	19.4	1.4e-07	1	163292	HUMAN	Alpha-2-macroglobulin
[5]		P01023	66	1151.26	4	1.2	GCVLLSYLNETVTVSASLESVR	HexNAc4Hex5NeuAc2@9	glycopepnew_HCDEThcDiTCIDpeptide_EThcDpd2	68.1	2	20106	40.6	1.2e-10	1	163292	HUMAN	Alpha-2-macroglobulin
[5]		P01023	66	1160.75	4	3.6	GCVLLSYLNETVTVSASLESVR	HexNAc4Hex5NeuAc2+Cation:K@9	glycopepnew_HCDEThcDiTCIDpeptide_EThcDpd2	64.717	1	19040	48.3	5.9e-15	1	163292	HUMAN	Alpha-2-macroglobulin
[21]		P25311	8	1387.35	4	0.46	GDVLHNGNGTYQSWVVVAVPPQDTAPYSCHVQH	HexNAc4Hex4FucNeuAc&Oxidation@(8&14)||HexNAc4Hex5NeuAc@8	glycopepnew_HCDEThcDiTCIDpeptide_EThcDpd2	37.083	1	9988	33.9	5.4e-15	1	34259	HUMAN	Zinc-alpha-2-glycoprotein
[21]		P25311	8	1387.6	4	-4.8	GDVLHNGNGTYQSWVVVAVPPQDTAPYSCHVQH	HexNAc4Hex5Fuc2@8	glycopepnew_HCDEThcDiTCIDpeptide_EThcDpd2	37.367	1	10084	15.9	9.8e-08	1	34259	HUMAN	Zinc-alpha-2-glycoprotein
[21]		P25311	8	1224.2	6	0.55	GDVLHNGNGTYQSWVVVAVPPQDTAPYSCHVQHSSLAQPLVVPWEAS	HexNAc2Hex11+Cation:K&Oxidation@(8&14)||HexNAc4Hex4FucNeuAc2+Cation:K&Oxidation@(8&14)||HexNAc4Hex5NeuAc2+Cation:K@8	glycopepnew_HCDEThcDiTCIDpeptide_EThcDpd2	49.75	2	14248	21.4	1.1e-07	1	34259	HUMAN	Zinc-alpha-2-glycoprotein
[24]		Q96PD5	4	1074.73	4	1.2	GFGVAIVGNYTAALPTEAALR	HexNAc4Hex5NeuAc2@9	glycopepnew_HCDEThcDiTCIDpeptide_EThcDpd2	53.983	1	15615	52.2	2.5e-15	1	62217.6	HUMAN	N-acetylmuramoyl-L-alanine amidase
[24]		Q96PD5	4	1084.22	4	-0.88	GFGVAIVGNYTAALPTEAALR	HexNAc4Hex5NeuAc2+Cation:K@9	glycopepnew_HCDEThcDiTCIDpeptide_EThcDpd2	54.15	2	15669	72.8	4.3e-20	1	62217.6	HUMAN	N-acetylmuramoyl-L-alanine amidase
[7]		P02790	34	777.313	6	-5.5	GHGHRNGTGHGNSTHHGPEYMR	HexNAc5Hex5FucNeuAc@12=16	glycopepnew_HCDEThcDiTCIDpeptide_EThcDpd2	14.2	2	2297	40.6	1.2e-08	1	51676.8	HUMAN	Hemopexin
[7]		P02790	34	865.833	4	0.13	GHGNSTHHGPEYMR	HexNAc2Hex9@4;Oxidation@13	glycopepnew_HCDEThcDiTCIDpeptide_EThcDpd2	14.133	2	2277	19.1	6.8e-07	1	51676.8	HUMAN	Hemopexin
[7]		P02790	34	940.363	5	-4.6	GHRNGTGHGNSTHHGPEYMR	HexNAc5Hex8Fuc+Cation:K@4|10	glycopepnew_HCDEThcDiTCIDpeptide_EThcDpd2	14.867	1	2510	17.6	0.00018	1	51676.8	HUMAN	Hemopexin
[1]		P01009	129	1189.71	5	-4.2	GLNFNLTEIPEAQIHEGFQELLR	HexNAc6Hex10FucNeuAc@5	glycopepnew_HCDEThcDiTCIDpeptide_EThcDpd2	61.267	1	17946	16	2.7e-07	1	46736.9	HUMAN	Alpha-1-antitrypsin
[31]		P0C0L4	3	837.588	4	-0.17	GLNVTLSSTGR	HexNAc4Hex5NeuAc2+Cation:K@3	glycopepnew_HCDEThcDiTCIDpeptide_EThcDpd2	33.583	1	8808	42.5	1.6e-15	1	192787	HUMAN	Complement C4-A
[12]		P01871	14	1182.72	4	-2.9	GLTFQQNASSMCVPDQDTAIR	HexNAc2Hex12+Cation:K@7||HexNAc4Hex5FucNeuAc2+Cation:K@7	glycopepnew_HCDEThcDiTCIDpeptide_EThcDpd2	40.6	2	11193	34.3	3e-09	1	49440.2	HUMAN	Immunoglobulin heavy constant mu
[12]		P01871	14	1173.48	4	-1.8	GLTFQQNASSMCVPDQDTAIR	HexNAc4Hex5Fuc3NeuAc@7||HexNAc9Hex3+Cation:K@7	glycopepnew_HCDEThcDiTCIDpeptide_EThcDpd2	40.717	1	11232	14.7	3.5e-05	1	49440.2	HUMAN	Immunoglobulin heavy constant mu
[12]		P01871	14	1156.72	4	2.4	GLTFQQNASSMCVPDQDTAIR	HexNAc5Hex4Fuc2NeuAc+Cation:K@7	glycopepnew_HCDEThcDiTCIDpeptide_EThcDpd2	35.45	2	9441	51.6	6.7e-12	1	49440.2	HUMAN	Immunoglobulin heavy constant mu
[12]		P01871	14	1110.72	4	1.3	GLTFQQNASSMCVPDQDTAIR	HexNAc5Hex4FucNeuAc@7	glycopepnew_HCDEThcDiTCIDpeptide_EThcDpd2	35.733	3	9540	17.4	2.1e-06	1	49440.2	HUMAN	Immunoglobulin heavy constant mu
[12]		P01871	14	1120.2	4	-0.48	GLTFQQNASSMCVPDQDTAIR	HexNAc5Hex4FucNeuAc+Cation:K@7	glycopepnew_HCDEThcDiTCIDpeptide_EThcDpd2	35.667	1	9513	36.6	1.3e-11	1	49440.2	HUMAN	Immunoglobulin heavy constant mu
[12]		P01871	14	1187.49	4	1.5	GLTFQQNASSMCVPDQDTAIR	HexNAc5Hex4FucNeuAc2&Oxidation@(7&11)||HexNAc5Hex5NeuAc2@7	glycopepnew_HCDEThcDiTCIDpeptide_EThcDpd2	29.35	1	7404	29.9	4.5e-08	1	49440.2	HUMAN	Immunoglobulin heavy constant mu
[12]		P01871	14	1155.48	4	-1.7	GLTFQQNASSMCVPDQDTAIR	HexNAc5Hex5Fuc3&Oxidation@(7&11)||HexNAc5Hex6Fuc2@7	glycopepnew_HCDEThcDiTCIDpeptide_EThcDpd2	31.233	1	8026	32.8	7.5e-11	1	49440.2	HUMAN	Immunoglobulin heavy constant mu
[3]		P00738	93	1190.34	5	0.92	GSFPWQAKMVSHHNLTTGATLINEQWLLTTAK	HexNAc4Hex5FucNeuAc2@14;Oxidation@9|26	glycopepnew_HCDEThcDiTCIDpeptide_EThcDpd2	41.733	1	11581	49.8	3.3e-12	1	45205.7	HUMAN	Haptoglobin
[3]		P00738	93	1202.14	5	-7.4	GSFPWQAKMVSHHNLTTGATLINEQWLLTTAK	HexNAc5Hex6Fuc3@14||HexNAc7Hex6&Oxidation&Oxidation@(14&9&26)	glycopepnew_HCDEThcDiTCIDpeptide_EThcDpd2	36.017	1	9635	18.4	0.00012	1	45205.7	HUMAN	Haptoglobin
[7]		P02790	34	1063.4	5	-5.5	GTGHGNSTHHGPEYMR	HexNAc7Hex7FucNeuAc3@6	glycopepnew_HCDEThcDiTCIDpeptide_EThcDpd2	14.35	1	2340	22.6	3e-07	1	51676.8	HUMAN	Hemopexin
[32]		P01042	4	1207.52	4	-1.1	HGIQYFNNNTQHSSLFMLNEVK	HexNAc4Hex5Fuc2NeuAc@8	glycopepnew_HCDEThcDiTCIDpeptide_EThcDpd2	36.6	1	9824	24.4	1.1e-07	1	71958	HUMAN	Kininogen-1
[32]		P01042	4	1207.26	4	-0.21	HGIQYFNNNTQHSSLFMLNEVK	HexNAc4Hex5NeuAc2@8	glycopepnew_HCDEThcDiTCIDpeptide_EThcDpd2	36.467	2	9781	44.2	1.7e-15	1	71958	HUMAN	Kininogen-1
[32]		P01042	4	1367.07	4	7.7	HGIQYFNNNTQHSSLFMLNEVK	HexNAc6Hex8NeuAc+Cation:K@8=14	glycopepnew_HCDEThcDiTCIDpeptide_EThcDpd2	36.3	2	9722	29.5	1e-09	1	71958	HUMAN	Kininogen-1
[25]		Q14624	5	1338.19	5	2.9	HLQMDIHIFEPQGISFLETESTFMTNQLVDALTTWQN	HexNAc4Hex5Fuc3NeuAc@37||HexNAc9Hex3+Cation:K@37	glycopepnew_HCDEThcDiTCIDpeptide_EThcDpd2	60.35	1	17647	20.2	1.8e-07	1	103358	HUMAN	Inter-alpha-trypsin inhibitor heavy chain H4
[25]		Q14624	5	1337.58	5	6.8	HLQMDIHIFEPQGISFLETESTFMTNQLVDALTTWQN	Oxidation@4=66;HexNAc5Hex6NeuAc+Cation:K@37;Oxidation@24|35	glycopepnew_HCDEThcDiTCIDpeptide_EThcDpd2	65.3	1	19226	19	1.1e-07	1	103358	HUMAN	Inter-alpha-trypsin inhibitor heavy chain H4
[14]		P01019	11	1109.82	3	0.46	HLVIHNESTCEQLAK	HexNAc3Hex4NeuAc@6	glycopepnew_HCDEThcDiTCIDpeptide_EThcDpd2	19.2	1	4041	18	1.2e-08	1	53154.7	HUMAN	Angiotensinogen
[14]		P01019	11	996.921	4	-4.2	HLVIHNESTCEQLAK	HexNAc4Hex5Fuc2NeuAc@6	glycopepnew_HCDEThcDiTCIDpeptide_EThcDpd2	21.717	3	4920	11.2	0.00019	1	53154.7	HUMAN	Angiotensinogen
[14]		P01019	11	1006.41	4	-5.8	HLVIHNESTCEQLAK	HexNAc4Hex5Fuc2NeuAc+Cation:K@6	glycopepnew_HCDEThcDiTCIDpeptide_EThcDpd2	19.233	2	4052	23.8	1.3e-07	1	53154.7	HUMAN	Angiotensinogen
[14]		P01019	11	1033.18	4	-0.42	HLVIHNESTCEQLAK	HexNAc4Hex5FucNeuAc2@6	glycopepnew_HCDEThcDiTCIDpeptide_EThcDpd2	19.183	1	4034	56.5	1.5e-12	1	53154.7	HUMAN	Angiotensinogen
[14]		P01019	11	923.896	4	-0.27	HLVIHNESTCEQLAK	HexNAc4Hex5NeuAc@6	glycopepnew_HCDEThcDiTCIDpeptide_EThcDpd2	17.033	1	3291	53.2	1.2e-17	1	53154.7	HUMAN	Angiotensinogen
[14]		P01019	11	996.671	4	0.99	HLVIHNESTCEQLAK	HexNAc4Hex5NeuAc2@6	glycopepnew_HCDEThcDiTCIDpeptide_EThcDpd2	19.233	1	4050	55	1.3e-17	1	53154.7	HUMAN	Angiotensinogen
[14]		P01019	11	1006.16	4	-1.3	HLVIHNESTCEQLAK	HexNAc4Hex5NeuAc2+Cation:K@6	glycopepnew_HCDEThcDiTCIDpeptide_EThcDpd2	19.167	2	4032	64.3	7.7e-18	1	53154.7	HUMAN	Angiotensinogen
[14]		P01019	11	1015.18	4	0.75	HLVIHNESTCEQLAK	HexNAc5Hex6NeuAc@6	glycopepnew_HCDEThcDiTCIDpeptide_EThcDpd2	16.567	2	3124	12.7	2.5e-05	1	53154.7	HUMAN	Angiotensinogen
[14]		P01019	11	1124.97	4	-0.8	HLVIHNESTCEQLAK	HexNAc7Hex8@6	glycopepnew_HCDEThcDiTCIDpeptide_EThcDpd2	18.767	2	3888	19.6	4.5e-06	1	53154.7	HUMAN	Angiotensinogen
[3]		P00738	93	1108.25	4	2.4	HNLTTGATLINEQWLLTTAK	HexNAc4Hex5NeuAc2@2	glycopepnew_HCDEThcDiTCIDpeptide_EThcDpd2	45.167	2	12749	46.3	2e-12	1	45205.7	HUMAN	Haptoglobin
[3]		P00738	93	1159.01	4	-3.8	HNLTTGATLINEQWLLTTAK	HexNAc5Hex5NeuAc2@2	glycopepnew_HCDEThcDiTCIDpeptide_EThcDpd2	36.167	1	9674	13.9	0.00013	1	45205.7	HUMAN	Haptoglobin
[3]		P00738	93	1214.29	4	-4.9	HNLTTGATLINEQWLLTTAK	HexNAc6Hex6Fuc3@2	glycopepnew_HCDEThcDiTCIDpeptide_EThcDpd2	39.633	1	10860	21.4	1.7e-08	1	45205.7	HUMAN	Haptoglobin
[3]		P00738	93	1268.04	4	2.6	HNLTTGATLINEQWLLTTAK	HexNAc6Hex8NeuAc+Cation:K@2=40	glycopepnew_HCDEThcDiTCIDpeptide_EThcDpd2	39.383	2	10777	13.9	2e-05	1	45205.7	HUMAN	Haptoglobin
[3]		P00738	93	1222.04	4	2.4	HNLTTGATLINEQWLLTTAK	HexNAc9Hex4Fuc+Cation:K@2=48	glycopepnew_HCDEThcDiTCIDpeptide_EThcDpd2	82.783	1	24727	22	2.1e-06	1	45205.7	HUMAN	Haptoglobin
[2]		P01876	118	1122.54	4	-3.9	HPRLSLHRPALEDLLLGSEANLTCTLTGLR	HexNAc3Hex3+Cation:K@21	glycopepnew_HCDEThcDiTCIDpeptide_EThcDpd2	44.6	2	12556	25.9	6.9e-10	2	37655	HUMAN	Immunoglobulin heavy constant alpha 1
[2]		P01876	118	913.82	5	-5.1	HRPALEDLLLGSEANLTCTLTGLR	HexNAc4Hex5Fuc2@15	glycopepnew_HCDEThcDiTCIDpeptide_EThcDpd2	47.45	1	13496	27.7	1.2e-06	2	37655	HUMAN	Immunoglobulin heavy constant alpha 1
[2]		P01876	118	1151.51	4	-4.8	HRPALEDLLLGSEANLTCTLTGLR	HexNAc4Hex5Fuc2+Cation:K@15	glycopepnew_HCDEThcDiTCIDpeptide_EThcDpd2	47.467	2	13504	27.1	1.3e-07	2	37655	HUMAN	Immunoglobulin heavy constant alpha 1
[2]		P01876	118	1038.74	4	0.54	HRPALEDLLLGSEANLTCTLTGLR	HexNAc5Hex3@15	glycopepnew_HCDEThcDiTCIDpeptide_EThcDpd2	43.733	1	12260	43.3	1.1e-08	2	37655	HUMAN	Immunoglobulin heavy constant alpha 1
[2]		P01876	118	1152.03	4	1.2	HRPALEDLLLGSEANLTCTLTGLR	HexNAc5Hex4NeuAc@15	glycopepnew_HCDEThcDiTCIDpeptide_EThcDpd2	47.717	1	13584	24.4	3.5e-05	2	37655	HUMAN	Immunoglobulin heavy constant alpha 1
[8]		P01024	26	1353.37	5	-7.3	HYLMWGLSSDFWGEKPNLSYIIGKDTWVEHW	HexNAc6Hex8FucNeuAc@17;Oxidation@4|5|12	glycopepnew_HCDEThcDiTCIDpeptide_EThcDpd2	35.117	1	9328	13.2	3.6e-05	1	187150	HUMAN	Complement C3
[8]		P01024	26	1273.74	5	-4.2	HYLMWGLSSDFWGEKPNLSYIIGKDTWVEHW	Oxidation@4=8;HexNAc5Hex5FucNeuAc2@17	glycopepnew_HCDEThcDiTCIDpeptide_EThcDpd2	27.167	2	6700	16.8	2.2e-05	1	187150	HUMAN	Complement C3
[8]		P01024	26	1215.52	5	-4.3	HYLMWGLSSDFWGEKPNLSYIIGKDTWVEHWP	Oxidation@12=7;HexNAc5Hex7@17;Oxidation@27|31	glycopepnew_HCDEThcDiTCIDpeptide_EThcDpd2	25.233	2	6073	13.2	4.3e-05	1	187150	HUMAN	Complement C3
[8]		P01024	26	1168.31	5	0.6	HYLMWGLSSDFWGEKPNLSYIIGKDTWVEHWPEED	HexNAc2Hex7@17;Oxidation&Oxidation@((4&(5|12|27))|(5&(12|27))|(12&27))	glycopepnew_HCDEThcDiTCIDpeptide_EThcDpd2	30.067	1	7625	10.8	0.00017	1	187150	HUMAN	Complement C3
[8]		P01024	26	1335.77	5	-6.3	HYLMWGLSSDFWGEKPNLSYIIGKDTWVEHWPEED	HexNAc7Hex6@17;Oxidation@4|5|12	glycopepnew_HCDEThcDiTCIDpeptide_EThcDpd2	31.1	1	7977	13.2	0.00018	1	187150	HUMAN	Complement C3
[2-1]	26	P01877	98	931.627	4	0.67	HYTNSSQDVTVPCR	HexNAc4Hex5FucNeuAc@4	glycopepnew_HCDEThcDiTCIDpeptide_EThcDpd2	17.317	1	3386	28	3.9e-11	1	36591.7	HUMAN	Immunoglobulin heavy constant alpha 2
[2-1]	26	P01877	98	941.114	4	-2	HYTNSSQDVTVPCR	HexNAc4Hex5FucNeuAc+Cation:K@4	glycopepnew_HCDEThcDiTCIDpeptide_EThcDpd2	17.267	3	3375	15.1	4.1e-06	1	36591.7	HUMAN	Immunoglobulin heavy constant alpha 2
[2-1]	26	P01877	98	1013.89	4	-0.12	HYTNSSQDVTVPCR	HexNAc4Hex5FucNeuAc2+Cation:K@4	glycopepnew_HCDEThcDiTCIDpeptide_EThcDpd2	20.117	1	4359	40.3	1.7e-17	1	36591.7	HUMAN	Immunoglobulin heavy constant alpha 2
[2-1]	26	P01877	98	982.397	4	0.88	HYTNSSQDVTVPCR	HexNAc5Hex5FucNeuAc@4	glycopepnew_HCDEThcDiTCIDpeptide_EThcDpd2	17.483	1	3441	35.8	1e-09	1	36591.7	HUMAN	Immunoglobulin heavy constant alpha 2
[2-1]	26	P01877	98	793.709	5	-1.5	HYTNSSQDVTVPCR	HexNAc5Hex5FucNeuAc+Cation:K@4	glycopepnew_HCDEThcDiTCIDpeptide_EThcDpd2	17.367	1	3405	42.7	3.1e-16	1	36591.7	HUMAN	Immunoglobulin heavy constant alpha 2
[2-1]	26	P01877	98	1055.17	4	1.3	HYTNSSQDVTVPCR	HexNAc5Hex5FucNeuAc2@4	glycopepnew_HCDEThcDiTCIDpeptide_EThcDpd2	20.183	1	4381	37.9	2.1e-13	1	36591.7	HUMAN	Immunoglobulin heavy constant alpha 2
[2-1]	26	P01877	98	1144.62	6	-1.9	HYTNSSQDVTVPCRVPPPPPCCHPR	HexNAc7Hex7FucNeuAc4+Cation:K@4	glycopepnew_HCDEThcDiTCIDpeptide_EThcDpd2	35.567	1	9479	13.9	3e-05	1	36591.7	HUMAN	Immunoglobulin heavy constant alpha 2
[2-1]	26	P01877	98	1144.27	5	-2.9	HYTNSSQDVTVPCRVPPPPPCCHPR	HexNAc8Hex7@4	glycopepnew_HCDEThcDiTCIDpeptide_EThcDpd2	25.417	2	6133	13.9	4.8e-05	1	36591.7	HUMAN	Immunoglobulin heavy constant alpha 2
[28]		P19827	4	1035.64	5	-8	ICDLLVANNHFAHFFAPQNLTNMNK	HexNAc4Hex5Fuc4+Cation:K@19=27	glycopepnew_HCDEThcDiTCIDpeptide_EThcDpd2	44.067	1	12378	41.8	2.1e-14	1	101390	HUMAN	Inter-alpha-trypsin inhibitor heavy chain H1
[28]		P19827	4	1284.3	4	0.077	ICDLLVANNHFAHFFAPQNLTNMNK	HexNAc4Hex5NeuAc2@19	glycopepnew_HCDEThcDiTCIDpeptide_EThcDpd2	44.25	1	12438	33.4	6.2e-10	1	101390	HUMAN	Inter-alpha-trypsin inhibitor heavy chain H1
[3]		P00738	93	1101.51	4	0.16	IEKVVLHPNYSQVDIGLIK	HexNAc4Hex7NeuAc@9	glycopepnew_HCDEThcDiTCIDpeptide_EThcDpd2	39.133	1	10680	26.3	8.2e-05	1	45205.7	HUMAN	Haptoglobin
[25]		Q14624	5	1159.51	5	0.8	IFEPQGISFLETESTFMTNQLVDALTTWQNK	HexNAc4Hex5NeuAc2@30	glycopepnew_HCDEThcDiTCIDpeptide_EThcDpd2	77.383	3	23099	31.4	1.7e-08	1	103358	HUMAN	Inter-alpha-trypsin inhibitor heavy chain H4
[5]		P01023	66	1087.48	4	-3.8	IITILEEEMNVSVCGLYTYGK	HexNAc4Hex5Fuc2@10	glycopepnew_HCDEThcDiTCIDpeptide_EThcDpd2	53.467	1	15455	15.6	1.9e-06	1	163292	HUMAN	Alpha-2-macroglobulin
[5]		P01023	66	1169.74	4	-5.1	IITILEEEMNVSVCGLYTYGK	HexNAc4Hex5Fuc2NeuAc+Cation:K@10	glycopepnew_HCDEThcDiTCIDpeptide_EThcDpd2	71.567	1	21234	23.2	2e-08	1	163292	HUMAN	Alpha-2-macroglobulin
[5]		P01023	66	1169.49	4	-3.1	IITILEEEMNVSVCGLYTYGK	HexNAc4Hex5NeuAc2+Cation:K@10=6	glycopepnew_HCDEThcDiTCIDpeptide_EThcDpd2	71.367	2	21171	19.6	4.9e-06	1	163292	HUMAN	Alpha-2-macroglobulin
[5]		P01023	66	1169.99	4	-3.2	IITILEEEMNVSVCGLYTYGK	Oxidation@9;HexNAc6Hex6+Cation:K@10	glycopepnew_HCDEThcDiTCIDpeptide_EThcDpd2	76.317	2	22759	13.1	7.6e-06	1	163292	HUMAN	Alpha-2-macroglobulin
[36]		P01591	3	1001.96	4	-0.8	IIVPLNNRENISDPTSPLR	HexNAc3Hex5FucNeuAc@10	glycopepnew_HCDEThcDiTCIDpeptide_EThcDpd2	33.65	2	8834	28.1	1.4e-08	1	18098.8	HUMAN	Immunoglobulin J chain
[36]		P01591	3	1125.51	4	1.7	IIVPLNNRENISDPTSPLR	HexNAc4Hex5FucNeuAc2@10	glycopepnew_HCDEThcDiTCIDpeptide_EThcDpd2	37.6	1	10164	27.4	2.4e-09	1	18098.8	HUMAN	Immunoglobulin J chain
[4]		P02787	67	1205.71	5	6.9	IMNGEADAMSLDGGFVYIAGKCGLVPVLAENYN	Oxidation@9;HexNAc6Hex6NeuAc+Cation:K@33	glycopepnew_HCDEThcDiTCIDpeptide_EThcDpd2	54.117	2	15659	16.6	1.2e-05	1	77064.7	HUMAN	Serotransferrin
[4]		P02787	67	1205.31	5	-1.4	IMNGEADAMSLDGGFVYIAGKCGLVPVLAENYNK	HexNAc4Hex6Fuc2NeuAc+Cation:K@33=17	glycopepnew_HCDEThcDiTCIDpeptide_EThcDpd2	54.033	1	15631	32	2.1e-11	1	77064.7	HUMAN	Serotransferrin
[39]		P01031	2	978.91	4	2.7	INFSLETWFGK	HexNAc5Hex6Fuc2NeuAc@2	glycopepnew_HCDEThcDiTCIDpeptide_EThcDpd2	65.717	1	19359	11.6	0.00012	1	188307	HUMAN	Complement C5
[19]		O75882	9	1001.09	6	2.4	INVSYWCWEDMSPFTNSLLQWMPSEPSDAGFCGILSEPSTRG	HexNAc3Hex3+Cation:K@2;Oxidation@6|8|11|21|22	glycopepnew_HCDEThcDiTCIDpeptide_EThcDpd2	24.55	1	5850	11.2	0.00012	1	158538	HUMAN	Attractin
[45]		P03952	2	920.637	4	-0.63	IYSGILNLSDITK	HexNAc4Hex5NeuAc2+Cation:K@7	glycopepnew_HCDEThcDiTCIDpeptide_EThcDpd2	51.8	1	14909	12	0.00012	1	71370.4	HUMAN	Plasma kallikrein
[1]		P01009	129	1336.98	5	0.55	KADTHDEILEGLNFNLTEIPEAQIHEGFQELLR	HexNAc5Hex6NeuAc3@15||HexNAc6Hex9Fuc+Cation:K@15	glycopepnew_HCDEThcDiTCIDpeptide_EThcDpd2	57.567	1	16749	26.8	4.3e-08	1	46736.9	HUMAN	Alpha-1-antitrypsin
[1]		P01009	129	1374.2	5	1.4	KADTHDEILEGLNFNLTEIPEAQIHEGFQELLR	HexNAc7Hex8NeuAc+Cation:K@15	glycopepnew_HCDEThcDiTCIDpeptide_EThcDpd2	62.733	2	18419	21.1	2.1e-06	1	46736.9	HUMAN	Alpha-1-antitrypsin
[4]		P02787	67	953.161	4	0.74	KCGLVPVLAENYNK	HexNAc4Hex5NeuAc2@13	glycopepnew_HCDEThcDiTCIDpeptide_EThcDpd2	33.4	1	8744	31.6	5.8e-13	1	77064.7	HUMAN	Serotransferrin
[13]		P01008	13	1050.95	4	-3	KLGACNDTLQQLMEVFK	HexNAc4Hex5Fuc2NeuAc@6	glycopepnew_HCDEThcDiTCIDpeptide_EThcDpd2	50.433	2	14464	22.3	1.9e-07	1	52602.9	HUMAN	Antithrombin-III
[27]		P51884	4	1091.49	4	2	KLHINHNNLTESVGPLPK	HexNAc4Hex5Fuc3NeuAc@8||HexNAc9Hex3+Cation:K@8	glycopepnew_HCDEThcDiTCIDpeptide_EThcDpd2	23.883	1	5634	23.8	4.3e-09	1	38429.3	HUMAN	Lumican
[3]		P00738	93	1032.73	4	2.1	KVVLHPNYSQVDIGLIK	HexNAc4Hex5NeuAc2@7	glycopepnew_HCDEThcDiTCIDpeptide_EThcDpd2	33.667	1	8836	38.5	9.8e-10	1	45205.7	HUMAN	Haptoglobin
[3]		P00738	93	833.972	5	-0.45	KVVLHPNYSQVDIGLIK	HexNAc4Hex5NeuAc2+Cation:K@7	glycopepnew_HCDEThcDiTCIDpeptide_EThcDpd2	33.833	2	8897	19.3	1.3e-08	1	45205.7	HUMAN	Haptoglobin
[3]		P00738	93	1124.01	4	0.99	KVVLHPNYSQVDIGLIK	HexNAc5Hex6NeuAc2@7	glycopepnew_HCDEThcDiTCIDpeptide_EThcDpd2	33.517	1	8786	33.4	2.1e-11	1	45205.7	HUMAN	Haptoglobin
[3]		P00738	93	1160.26	4	-1.9	KVVLHPNYSQVDIGLIK	HexNAc6Hex9+Cation:K@7	glycopepnew_HCDEThcDiTCIDpeptide_EThcDpd2	39.617	2	10858	29.8	2.3e-06	1	45205.7	HUMAN	Haptoglobin
[1]		P01009	129	1023.2	4	-3.8	KYLGNATAIFFLPDEGK	HexNAc4Hex5Fuc2NeuAc@5	glycopepnew_HCDEThcDiTCIDpeptide_EThcDpd2	44.983	1	12685	15.4	6.6e-05	1	46736.9	HUMAN	Alpha-1-antitrypsin
[2]		P01876	118	915.128	4	5.6	LAGKPTHVNVS	HexNAc4Hex5Fuc2NeuAc2+Cation:K@9	glycopepnew_HCDEThcDiTCIDpeptide_EThcDpd2	49	1	13993	14.2	4.6e-05	1	37655	HUMAN	Immunoglobulin heavy constant alpha 1
[2]		P01876	118	903.627	4	-4	LAGKPTHVNVSV	HexNAc4Hex5Fuc3NeuAc+Cation:K@9	glycopepnew_HCDEThcDiTCIDpeptide_EThcDpd2	23.5	1	5501	10	0.00016	1	37655	HUMAN	Immunoglobulin heavy constant alpha 1
[2]		P01876	118	919.149	4	-5	LAGKPTHVNVSVVM	HexNAc4Hex5Fuc2NeuAc&Oxidation@(9&14)||HexNAc4Hex6FucNeuAc@9	glycopepnew_HCDEThcDiTCIDpeptide_EThcDpd2	32.5	2	8441	13	9.9e-06	1	37655	HUMAN	Immunoglobulin heavy constant alpha 1
[2]		P01876	118	915.661	4	-7.7	LAGKPTHVNVSVVMAEVDG	HexNAc4Hex3Fuc3@9	glycopepnew_HCDEThcDiTCIDpeptide_EThcDpd2	48.55	1	13849	14.2	0.00018	1	37655	HUMAN	Immunoglobulin heavy constant alpha 1
[2]		P01876	118	857.36	5	0.025	LAGKPTHVNVSVVMAEVDGT	HexNAc4Hex5NeuAc2+Cation:K@9;Oxidation@14	glycopepnew_HCDEThcDiTCIDpeptide_EThcDpd2	34.917	1	9261	20.8	5.9e-07	1	37655	HUMAN	Immunoglobulin heavy constant alpha 1
[2]		P01876	118	1112.73	4	0.18	LAGKPTHVNVSVVMAEVDGT	HexNAc5Hex5NeuAc2@9;Oxidation@14	glycopepnew_HCDEThcDiTCIDpeptide_EThcDpd2	36.233	2	9698	13	1.2e-05	1	37655	HUMAN	Immunoglobulin heavy constant alpha 1
[2]		P01876	118	1131.24	4	-1.1	LAGKPTHVNVSVVMAEVDGT	HexNAc6Hex6NeuAc&Oxidation@(9&14)||HexNAc9Hex3Fuc+Cation:K@9	glycopepnew_HCDEThcDiTCIDpeptide_EThcDpd2	26.033	3	6336	12.1	5e-05	1	37655	HUMAN	Immunoglobulin heavy constant alpha 1
[2]		P01876	118	956.796	5	-6.5	LAGKPTHVNVSVVMAEVDGT	HexNAc7Hex7Fuc+Cation:K&Oxidation@(9&14)||HexNAc7Hex8+Cation:K@9	glycopepnew_HCDEThcDiTCIDpeptide_EThcDpd2	37.5	1	10131	13	8.4e-06	1	37655	HUMAN	Immunoglobulin heavy constant alpha 1
[2]		P01876	118	1143.97	4	-3.2	LAGKPTHVNVSVVMAEVDGTC	HexNAc2Hex12+Cation:K@9||HexNAc4Hex5FucNeuAc2+Cation:K@9	glycopepnew_HCDEThcDiTCIDpeptide_EThcDpd2	39.3	2	10745	17.8	3.5e-08	1	37655	HUMAN	Immunoglobulin heavy constant alpha 1
[2]		P01876	118	865.136	4	0.21	LAGKPTHVNVSVVMAEVDGTC	HexNAc3Hex4@9;Oxidation@14	glycopepnew_HCDEThcDiTCIDpeptide_EThcDpd2	20.533	1	4503	22.3	1.1e-08	1	37655	HUMAN	Immunoglobulin heavy constant alpha 1
[2]		P01876	118	857.159	5	-0.65	LAGKPTHVNVSVVMAEVDGTC	HexNAc4Hex4Fuc2NeuAc+Cation:K&Oxidation@(9&14)||HexNAc4Hex5FucNeuAc+Cation:K@9	glycopepnew_HCDEThcDiTCIDpeptide_EThcDpd2	34.733	1	9194	30.7	2.6e-10	1	37655	HUMAN	Immunoglobulin heavy constant alpha 1
[2]		P01876	118	1061.71	4	1.1	LAGKPTHVNVSVVMAEVDGTC	HexNAc4Hex5FucNeuAc@9=10	glycopepnew_HCDEThcDiTCIDpeptide_EThcDpd2	32.017	2	8293	28.3	1.9e-09	1	37655	HUMAN	Immunoglobulin heavy constant alpha 1
[2]		P01876	118	1134.48	4	0.8	LAGKPTHVNVSVVMAEVDGTC	HexNAc4Hex5FucNeuAc2@9	glycopepnew_HCDEThcDiTCIDpeptide_EThcDpd2	34.05	2	8972	26.2	4.9e-13	1	37655	HUMAN	Immunoglobulin heavy constant alpha 1
[2]		P01876	118	1138.48	4	-0.55	LAGKPTHVNVSVVMAEVDGTC	HexNAc4Hex5FucNeuAc2@9;Oxidation@14	glycopepnew_HCDEThcDiTCIDpeptide_EThcDpd2	30.967	1	7926	15.7	5.7e-06	1	37655	HUMAN	Immunoglobulin heavy constant alpha 1
[2]		P01876	118	1112.48	4	2.1	LAGKPTHVNVSVVMAEVDGTC	HexNAc5Hex4Fuc2NeuAc&Oxidation@(9&14)||HexNAc5Hex5FucNeuAc@9	glycopepnew_HCDEThcDiTCIDpeptide_EThcDpd2	34.567	1	9136	10.3	0.00011	1	37655	HUMAN	Immunoglobulin heavy constant alpha 1
[2]		P01876	118	1112.48	4	2.8	LAGKPTHVNVSVVMAEVDGTC	HexNAc5Hex4Fuc2NeuAc@9=10;Oxidation@14=10	glycopepnew_HCDEThcDiTCIDpeptide_EThcDpd2	36.65	2	9844	22	2e-07	1	37655	HUMAN	Immunoglobulin heavy constant alpha 1
[2]		P01876	118	897.775	5	-0.44	LAGKPTHVNVSVVMAEVDGTC	HexNAc5Hex4Fuc2NeuAc+Cation:K&Oxidation@(9&14)||HexNAc5Hex5FucNeuAc+Cation:K@9	glycopepnew_HCDEThcDiTCIDpeptide_EThcDpd2	34.783	1	9215	31.9	8.1e-10	1	37655	HUMAN	Immunoglobulin heavy constant alpha 1
[2]		P01876	118	1117.97	4	5.2	LAGKPTHVNVSVVMAEVDGTC	HexNAc5Hex4Fuc2NeuAc+Cation:K@9	glycopepnew_HCDEThcDiTCIDpeptide_EThcDpd2	34.767	1	9205	16.9	4.3e-08	1	37655	HUMAN	Immunoglobulin heavy constant alpha 1
[2]		P01876	118	1075.97	4	0.9	LAGKPTHVNVSVVMAEVDGTC	HexNAc5Hex4FucNeuAc&Oxidation@(9&14)||HexNAc5Hex5NeuAc@9	glycopepnew_HCDEThcDiTCIDpeptide_EThcDpd2	23.2	2	5400	17.2	6.1e-07	1	37655	HUMAN	Immunoglobulin heavy constant alpha 1
[2]		P01876	118	897.974	5	-6.2	LAGKPTHVNVSVVMAEVDGTC	HexNAc5Hex5Fuc3+Cation:K@9	glycopepnew_HCDEThcDiTCIDpeptide_EThcDpd2	34.933	1	9263	21.1	2e-07	1	37655	HUMAN	Immunoglobulin heavy constant alpha 1
[2]		P01876	118	1185.25	4	0.5	LAGKPTHVNVSVVMAEVDGTC	HexNAc5Hex5FucNeuAc2@9	glycopepnew_HCDEThcDiTCIDpeptide_EThcDpd2	38.183	1	10357	11.2	3.5e-05	1	37655	HUMAN	Immunoglobulin heavy constant alpha 1
[2]		P01876	118	1194.74	4	-1.3	LAGKPTHVNVSVVMAEVDGTC	HexNAc5Hex5FucNeuAc2+Cation:K@9	glycopepnew_HCDEThcDiTCIDpeptide_EThcDpd2	39.167	1	10697	15.1	8.8e-08	1	37655	HUMAN	Immunoglobulin heavy constant alpha 1
[2]		P01876	118	1156.99	4	0.27	LAGKPTHVNVSVVMAEVDGTC	HexNAc5Hex6FucNeuAc@9;Oxidation@14	glycopepnew_HCDEThcDiTCIDpeptide_EThcDpd2	25.117	1	6034	10	5.6e-05	1	37655	HUMAN	Immunoglobulin heavy constant alpha 1
[2]		P01876	118	1086.22	4	-2.7	LAGKPTHVNVSVVMAEVDGTC	HexNAc6Hex4NeuAc@9=11	glycopepnew_HCDEThcDiTCIDpeptide_EThcDpd2	32.95	1	8597	15.1	1.5e-05	1	37655	HUMAN	Immunoglobulin heavy constant alpha 1
[2]		P01876	118	967.399	5	-0.32	LAGKPTHVNVSVVMAEVDGTC	HexNAc6Hex5NeuAc2+Cation:K@9	glycopepnew_HCDEThcDiTCIDpeptide_EThcDpd2	25.983	1	6317	22.9	2.4e-09	1	37655	HUMAN	Immunoglobulin heavy constant alpha 1
[2]		P01876	118	915.779	5	-2.9	LAGKPTHVNVSVVMAEVDGTC	HexNAc6Hex6Fuc+Cation:K&Oxidation@(9&14)||HexNAc6Hex7+Cation:K@9	glycopepnew_HCDEThcDiTCIDpeptide_EThcDpd2	37.55	1	10151	16	5e-06	1	37655	HUMAN	Immunoglobulin heavy constant alpha 1
[2]		P01876	118	1195.24	4	-2.4	LAGKPTHVNVSVVMAEVDGTC	HexNAc7Hex7+Cation:K@9	glycopepnew_HCDEThcDiTCIDpeptide_EThcDpd2	40.5	1	11153	13	0.00021	1	37655	HUMAN	Immunoglobulin heavy constant alpha 1
[2]		P01876	118	915.58	5	-1.1	LAGKPTHVNVSVVMAEVDGTCY	HexNAc2Hex11+Cation:K@9||HexNAc4Hex4FucNeuAc2+Cation:K@9	glycopepnew_HCDEThcDiTCIDpeptide_EThcDpd2	36.883	1	9927	17.8	4.9e-06	1	37655	HUMAN	Immunoglobulin heavy constant alpha 1
[2]		P01876	118	901.136	4	0.019	LAGKPTHVNVSVVMAEVDGTCY	HexNAc2Hex4Fuc+Cation:K&Oxidation@(9&14)||HexNAc2Hex5+Cation:K@9	glycopepnew_HCDEThcDiTCIDpeptide_EThcDpd2	33.167	1	8667	22.9	4.3e-09	1	37655	HUMAN	Immunoglobulin heavy constant alpha 1
[2]		P01876	118	905.904	4	1.6	LAGKPTHVNVSVVMAEVDGTCY	HexNAc3Hex4@9;Oxidation@14	glycopepnew_HCDEThcDiTCIDpeptide_EThcDpd2	23.583	1	5525	21.1	1e-06	1	37655	HUMAN	Immunoglobulin heavy constant alpha 1
[2]		P01876	118	916.156	4	-2.5	LAGKPTHVNVSVVMAEVDGTCY	HexNAc4Hex3@9;Oxidation@14	glycopepnew_HCDEThcDiTCIDpeptide_EThcDpd2	41.967	1	11655	13.9	7.3e-05	1	37655	HUMAN	Immunoglobulin heavy constant alpha 1
[2]		P01876	118	1102.47	4	0.24	LAGKPTHVNVSVVMAEVDGTCY	HexNAc4Hex4Fuc2NeuAc&Oxidation@(9&14)||HexNAc4Hex5FucNeuAc@9	glycopepnew_HCDEThcDiTCIDpeptide_EThcDpd2	36.65	1	9842	28	4.7e-09	1	37655	HUMAN	Immunoglobulin heavy constant alpha 1
[2]		P01876	118	1065.96	4	0.091	LAGKPTHVNVSVVMAEVDGTCY	HexNAc4Hex4FucNeuAc&Oxidation@(9&14)||HexNAc4Hex5NeuAc@9	glycopepnew_HCDEThcDiTCIDpeptide_EThcDpd2	36.7	1	9861	18.1	9e-07	1	37655	HUMAN	Immunoglobulin heavy constant alpha 1
[2]		P01876	118	1075.7	4	-6.7	LAGKPTHVNVSVVMAEVDGTCY	HexNAc4Hex5Fuc2+Cation:K@9	glycopepnew_HCDEThcDiTCIDpeptide_EThcDpd2	36.7	2	9863	12.7	3.1e-05	1	37655	HUMAN	Immunoglobulin heavy constant alpha 1
[2]		P01876	118	1175.25	4	1.3	LAGKPTHVNVSVVMAEVDGTCY	HexNAc4Hex5FucNeuAc2@9	glycopepnew_HCDEThcDiTCIDpeptide_EThcDpd2	42.167	2	11736	15.7	9.2e-08	1	37655	HUMAN	Immunoglobulin heavy constant alpha 1
[2]		P01876	118	1080.47	4	1.5	LAGKPTHVNVSVVMAEVDGTCY	HexNAc5Hex4Fuc2&Oxidation@(9&14)||HexNAc5Hex5Fuc@9	glycopepnew_HCDEThcDiTCIDpeptide_EThcDpd2	32.933	1	8595	21.1	7e-08	1	37655	HUMAN	Immunoglobulin heavy constant alpha 1
[2]		P01876	118	1153.24	4	-0.68	LAGKPTHVNVSVVMAEVDGTCY	HexNAc5Hex4Fuc2NeuAc&Oxidation@(9&14)||HexNAc5Hex5FucNeuAc@9	glycopepnew_HCDEThcDiTCIDpeptide_EThcDpd2	36.85	1	9912	16	1.5e-05	1	37655	HUMAN	Immunoglobulin heavy constant alpha 1
[2]		P01876	118	1122.47	4	-5.2	LAGKPTHVNVSVVMAEVDGTCY	HexNAc5Hex4Fuc3+Cation:K@9	glycopepnew_HCDEThcDiTCIDpeptide_EThcDpd2	36.733	1	9871	16	8e-06	1	37655	HUMAN	Immunoglobulin heavy constant alpha 1
[2]		P01876	118	1226.02	4	0.018	LAGKPTHVNVSVVMAEVDGTCY	HexNAc5Hex5FucNeuAc2@9	glycopepnew_HCDEThcDiTCIDpeptide_EThcDpd2	41.1	1	11360	13.6	1.3e-05	1	37655	HUMAN	Immunoglobulin heavy constant alpha 1
[2]		P01876	118	988.606	5	-1.4	LAGKPTHVNVSVVMAEVDGTCY	HexNAc5Hex5FucNeuAc2+Cation:K@9	glycopepnew_HCDEThcDiTCIDpeptide_EThcDpd2	41.283	1	11428	19.9	1.3e-09	1	37655	HUMAN	Immunoglobulin heavy constant alpha 1
[2]		P01876	118	956.594	5	-6.5	LAGKPTHVNVSVVMAEVDGTCY	HexNAc7Hex6+Cation:K@9	glycopepnew_HCDEThcDiTCIDpeptide_EThcDpd2	40.767	1	11252	16	8.5e-06	1	37655	HUMAN	Immunoglobulin heavy constant alpha 1
[2]		P01876	118	1021.7	4	-0.12	LEDLLLGSEANLTCTLTGLR	HexNAc3Hex5FucNeuAc+Cation:K@11	glycopepnew_HCDEThcDiTCIDpeptide_EThcDpd2	52.317	1	15078	27.9	6.8e-07	2	37655	HUMAN	Immunoglobulin heavy constant alpha 1
[24]		Q96PD5	4	1010.83	5	-1.7	LEPVHLQLQCMSQEQLAQVAANATK	HexNAc4Hex5NeuAc2+Cation:K@22=19	glycopepnew_HCDEThcDiTCIDpeptide_EThcDpd2	43.333	1	12140	29.4	1.4e-11	1	62217.6	HUMAN	N-acetylmuramoyl-L-alanine amidase
[4]		P02787	67	1050.42	4	1.6	LFGSNVTDCSGNFCLFR	HexNAc4Hex5NeuAc2@5	glycopepnew_HCDEThcDiTCIDpeptide_EThcDpd2	51.633	1	14860	41.2	3.1e-11	1	77064.7	HUMAN	Serotransferrin
[4]		P02787	67	1059.91	4	-0.8	LFGSNVTDCSGNFCLFR	HexNAc4Hex5NeuAc2+Cation:K@5	glycopepnew_HCDEThcDiTCIDpeptide_EThcDpd2	51.717	2	14889	40.7	1.5e-15	1	77064.7	HUMAN	Serotransferrin
[13]		P01008	13	1018.68	4	0.97	LGACNDTLQQLMEVFK	HexNAc4Hex5NeuAc2@5	glycopepnew_HCDEThcDiTCIDpeptide_EThcDpd2	60.083	1	17559	43.3	3.6e-15	1	52602.9	HUMAN	Antithrombin-III
[13]		P01008	13	1028.16	4	-1.1	LGACNDTLQQLMEVFK	HexNAc4Hex5NeuAc2+Cation:K@5=62	glycopepnew_HCDEThcDiTCIDpeptide_EThcDpd2	59.983	1	17522	65.1	1.5e-15	1	52602.9	HUMAN	Antithrombin-III
[13]		P01008	13	1032.93	4	-1.1	LGACNDTLQQLMEVFK	HexNAc5Hex4NeuAc2@5;Oxidation@12	glycopepnew_HCDEThcDiTCIDpeptide_EThcDpd2	39.467	1	10808	29	3.1e-08	1	52602.9	HUMAN	Antithrombin-III
[13]		P01008	13	1182.74	4	3	LGACNDTLQQLMEVFK	HexNAc5Hex6NeuAc3@5	glycopepnew_HCDEThcDiTCIDpeptide_EThcDpd2	70.733	2	20964	25.3	2.9e-10	1	52602.9	HUMAN	Antithrombin-III
[13]		P01008	13	1192.22	4	0.95	LGACNDTLQQLMEVFK	HexNAc5Hex6NeuAc3+Cation:K@5	glycopepnew_HCDEThcDiTCIDpeptide_EThcDpd2	70.75	1	20966	36.6	3.5e-13	1	52602.9	HUMAN	Antithrombin-III
[1]		P01009	129	1014.66	4	-4.1	LGNATAIFFLPDEGK	HexNAc5Hex6FucNeuAc+Cation:K@3	glycopepnew_HCDEThcDiTCIDpeptide_EThcDpd2	58.967	1	17202	24.5	5.8e-11	1	46736.9	HUMAN	Alpha-1-antitrypsin
[1]		P01009	129	1329.57	3	-4.6	LGNATAIFFLPDEGK	HexNAc7Hex6@3	glycopepnew_HCDEThcDiTCIDpeptide_EThcDpd2	72.9	2	21661	11.6	6.5e-06	1	46736.9	HUMAN	Alpha-1-antitrypsin
[1]		P01009	129	1006.92	4	-5	LGNATAIFFLPDEGK	HexNAc7Hex6+Cation:K@3	glycopepnew_HCDEThcDiTCIDpeptide_EThcDpd2	72.017	2	21370	34.9	1.5e-12	1	46736.9	HUMAN	Alpha-1-antitrypsin
[1]		P01009	129	1311.78	5	-8	LGTKADTHDEILEGLNFNLTEIPEAQIHEGFQELLR	HexNAc5Hex6Fuc3+Cation:K@18	glycopepnew_HCDEThcDiTCIDpeptide_EThcDpd2	68.967	2	20387	26.2	1.5e-08	1	46736.9	HUMAN	Alpha-1-antitrypsin
[1]		P01009	129	1369.79	5	-7.5	LGTKADTHDEILEGLNFNLTEIPEAQIHEGFQELLR	HexNAc5Hex6FucNeuAc2+Cation:K@18	glycopepnew_HCDEThcDiTCIDpeptide_EThcDpd2	62.733	1	18417	24.6	2.2e-09	1	46736.9	HUMAN	Alpha-1-antitrypsin
[1]		P01009	129	1384.6	5	-7.9	LGTKADTHDEILEGLNFNLTEIPEAQIHEGFQELLR	HexNAc6Hex7FucNeuAc+Cation:K@18	glycopepnew_HCDEThcDiTCIDpeptide_EThcDpd2	61.85	1	18132	24.4	1e-07	1	46736.9	HUMAN	Alpha-1-antitrypsin
[27]		P51884	4	913.67	4	1.7	LHINHNNLTESVGPLPK	HexNAc4Hex5Fuc@7	glycopepnew_HCDEThcDiTCIDpeptide_EThcDpd2	21.4	1	4814	56.7	1e-15	1	38429.3	HUMAN	Lumican
[27]		P51884	4	986.445	4	2.4	LHINHNNLTESVGPLPK	HexNAc4Hex5FucNeuAc@7	glycopepnew_HCDEThcDiTCIDpeptide_EThcDpd2	24.033	1	5680	40.4	4.1e-13	1	38429.3	HUMAN	Lumican
[27]		P51884	4	1054.72	4	-0.58	LHINHNNLTESVGPLPKS	HexNAc5Hex4NeuAc2@7	glycopepnew_HCDEThcDiTCIDpeptide_EThcDpd2	24.517	1	5842	21.7	1e-07	1	38429.3	HUMAN	Lumican
[3]		P00738	93	910.913	4	4	LHPNYSQVDIGLIK	HexNAc4Hex4Fuc2NeuAc@4	glycopepnew_HCDEThcDiTCIDpeptide_EThcDpd2	39.583	1	10844	19.4	1.6e-06	1	45205.7	HUMAN	Haptoglobin
[3]		P00738	93	1170.25	4	5.6	LHPNYSQVDIGLIK	HexNAc6Hex7FucNeuAc2@4	glycopepnew_HCDEThcDiTCIDpeptide_EThcDpd2	44.967	1	12676	33.2	1.1e-07	1	45205.7	HUMAN	Haptoglobin
[45]		P03952	2	1113.75	4	2.1	LQAPLNYTEFQKPICLPSK	HexNAc4Hex5NeuAc2@6	glycopepnew_HCDEThcDiTCIDpeptide_EThcDpd2	42.267	2	11769	34	5.2e-10	1	71370.4	HUMAN	Plasma kallikrein
[13]		P01008	13	1032.22	4	6.8	LSISTAFAMTKLGACNDTLQQLMEVFK	Oxidation@23=7;HexNAc2Hex3Fuc+Cation:K&Oxidation@(16&9)||HexNAc2Hex4+Cation:K@16	glycopepnew_HCDEThcDiTCIDpeptide_EThcDpd2	32.667	1	8501	20.9	0.00012	1	52602.9	HUMAN	Antithrombin-III
[17]		P01011	12	1026.08	5	2	LSISTALAFLSLGAHNTTLTEILK	HexNAc6Hex5Fuc2NeuAc@16	glycopepnew_HCDEThcDiTCIDpeptide_EThcDpd2	63.717	1	18717	14	5.9e-05	1	47651.3	HUMAN	Alpha-1-antichymotrypsin
[2]		P01876	118	1030.26	5	1.1	LSLHRPALEDLLLGSEANLT	HexNAc6Hex10Fuc@18	glycopepnew_HCDEThcDiTCIDpeptide_EThcDpd2	48.15	2	13719	28	4.2e-10	2	37655	HUMAN	Immunoglobulin heavy constant alpha 1
[2]		P01876	118	877.01	5	5.2	LSLHRPALEDLLLGSEANLTCTLT	HexNAc3Hex7@18	glycopepnew_HCDEThcDiTCIDpeptide_EThcDpd2	44.533	1	12528	16.3	0.00014	2	37655	HUMAN	Immunoglobulin heavy constant alpha 1
[2]		P01876	118	988.645	5	3	LSLHRPALEDLLLGSEANLTCTLT	HexNAc5Hex5Fuc3+Cation:K@18	glycopepnew_HCDEThcDiTCIDpeptide_EThcDpd2	47.967	2	13668	40.9	2e-13	2	37655	HUMAN	Immunoglobulin heavy constant alpha 1
[2]		P01876	118	1235.8	4	-4.2	LSLHRPALEDLLLGSEANLTCTLTG	HexNAc5Hex4NeuAc2@18	glycopepnew_HCDEThcDiTCIDpeptide_EThcDpd2	48.183	2	13729	16	1.9e-05	2	37655	HUMAN	Immunoglobulin heavy constant alpha 1
[2]		P01876	118	792.425	4	0.38	LSLHRPALEDLLLGSEANLTCTLTGLR	HexNAc@18	glycopepnew_HCDEThcDiTCIDpeptide_EThcDpd2	45.767	1	12946	49.8	2.1e-11	2	37655	HUMAN	Immunoglobulin heavy constant alpha 1
[2]		P01876	118	1045.76	4	0.82	LSLHRPALEDLLLGSEANLTCTLTGLR	HexNAc2Hex5@18	glycopepnew_HCDEThcDiTCIDpeptide_EThcDpd2	44.55	1	12538	73.1	3.4e-13	2	37655	HUMAN	Immunoglobulin heavy constant alpha 1
[2]		P01876	118	1086.27	4	-0.24	LSLHRPALEDLLLGSEANLTCTLTGLR	HexNAc2Hex6@18	glycopepnew_HCDEThcDiTCIDpeptide_EThcDpd2	44.583	1	12552	42.1	3.5e-12	2	37655	HUMAN	Immunoglobulin heavy constant alpha 1
[2]		P01876	118	1056.02	4	1.1	LSLHRPALEDLLLGSEANLTCTLTGLR	HexNAc3Hex4@18	glycopepnew_HCDEThcDiTCIDpeptide_EThcDpd2	44.733	1	12599	15.3	0.00011	2	37655	HUMAN	Immunoglobulin heavy constant alpha 1
[2]		P01876	118	1066.28	4	1.9	LSLHRPALEDLLLGSEANLTCTLTGLR	HexNAc4Hex3@18	glycopepnew_HCDEThcDiTCIDpeptide_EThcDpd2	44.75	1	12605	17.3	0.00018	2	37655	HUMAN	Immunoglobulin heavy constant alpha 1
[2]		P01876	118	1106.79	4	1	LSLHRPALEDLLLGSEANLTCTLTGLR	HexNAc4Hex4@18	glycopepnew_HCDEThcDiTCIDpeptide_EThcDpd2	44.567	2	12542	55.2	4.6e-12	2	37655	HUMAN	Immunoglobulin heavy constant alpha 1
[2]		P01876	118	980.65	5	-3.1	LSLHRPALEDLLLGSEANLTCTLTGLR	HexNAc4Hex4FucNeuAc+Cation:K@18	glycopepnew_HCDEThcDiTCIDpeptide_EThcDpd2	48.15	1	13717	71	2.3e-21	2	37655	HUMAN	Immunoglobulin heavy constant alpha 1
[2]		P01876	118	1179.56	4	1.9	LSLHRPALEDLLLGSEANLTCTLTGLR	HexNAc4Hex4NeuAc@18	glycopepnew_HCDEThcDiTCIDpeptide_EThcDpd2	48.333	1	13774	40.1	3.8e-09	2	37655	HUMAN	Immunoglobulin heavy constant alpha 1
[2]		P01876	118	976.461	5	-4.4	LSLHRPALEDLLLGSEANLTCTLTGLR	HexNAc4Hex5Fuc2@18	glycopepnew_HCDEThcDiTCIDpeptide_EThcDpd2	47.967	1	13666	38.8	1.5e-12	2	37655	HUMAN	Immunoglobulin heavy constant alpha 1
[2]		P01876	118	1220.08	4	1.4	LSLHRPALEDLLLGSEANLTCTLTGLR	HexNAc4Hex5NeuAc@18	glycopepnew_HCDEThcDiTCIDpeptide_EThcDpd2	48.367	1	13784	30.7	1.4e-07	2	37655	HUMAN	Immunoglobulin heavy constant alpha 1
[2]		P01876	118	1229.56	4	-2.5	LSLHRPALEDLLLGSEANLTCTLTGLR	HexNAc4Hex5NeuAc+Cation:K@18	glycopepnew_HCDEThcDiTCIDpeptide_EThcDpd2	48.183	1	13727	44.9	5.8e-12	2	37655	HUMAN	Immunoglobulin heavy constant alpha 1
[2]		P01876	118	1034.48	5	2.5	LSLHRPALEDLLLGSEANLTCTLTGLR	HexNAc4Hex5NeuAc2@18	glycopepnew_HCDEThcDiTCIDpeptide_EThcDpd2	52.467	1	15127	68.8	1.9e-17	2	37655	HUMAN	Immunoglobulin heavy constant alpha 1
[2]		P01876	118	987.249	5	-5.9	LSLHRPALEDLLLGSEANLTCTLTGLR	HexNAc4Hex6Fuc+Cation:K@18	glycopepnew_HCDEThcDiTCIDpeptide_EThcDpd2	47.35	1	13465	13.6	6.6e-06	2	37655	HUMAN	Immunoglobulin heavy constant alpha 1
[2]		P01876	118	1008.87	5	-1.7	LSLHRPALEDLLLGSEANLTCTLTGLR	HexNAc4Hex6Fuc2@18	glycopepnew_HCDEThcDiTCIDpeptide_EThcDpd2	48.283	2	13758	21.8	4.2e-09	2	37655	HUMAN	Immunoglobulin heavy constant alpha 1
[2]		P01876	118	1117.05	4	1.1	LSLHRPALEDLLLGSEANLTCTLTGLR	HexNAc5Hex3@18	glycopepnew_HCDEThcDiTCIDpeptide_EThcDpd2	44.6	1	12554	58.4	4.7e-11	2	37655	HUMAN	Immunoglobulin heavy constant alpha 1
[2]		P01876	118	901.428	5	0.014	LSLHRPALEDLLLGSEANLTCTLTGLR	HexNAc5Hex3+Cation:K@18	glycopepnew_HCDEThcDiTCIDpeptide_EThcDpd2	44.817	1	12626	12.8	7.8e-05	2	37655	HUMAN	Immunoglobulin heavy constant alpha 1
[2]		P01876	118	1153.56	4	4.4	LSLHRPALEDLLLGSEANLTCTLTGLR	HexNAc5Hex3Fuc@18	glycopepnew_HCDEThcDiTCIDpeptide_EThcDpd2	44.617	1	12562	32.3	1.1e-06	2	37655	HUMAN	Immunoglobulin heavy constant alpha 1
[2]		P01876	118	1157.56	4	-0.046	LSLHRPALEDLLLGSEANLTCTLTGLR	HexNAc5Hex4@18	glycopepnew_HCDEThcDiTCIDpeptide_EThcDpd2	44.5	3	12520	38.2	1.6e-08	2	37655	HUMAN	Immunoglobulin heavy constant alpha 1
[2]		P01876	118	933.837	5	-1.4	LSLHRPALEDLLLGSEANLTCTLTGLR	HexNAc5Hex4+Cation:K@18	glycopepnew_HCDEThcDiTCIDpeptide_EThcDpd2	44.533	2	12530	49.2	1.8e-14	2	37655	HUMAN	Immunoglobulin heavy constant alpha 1
[2]		P01876	118	1271.1	4	-2	LSLHRPALEDLLLGSEANLTCTLTGLR	HexNAc5Hex5Fuc2@18	glycopepnew_HCDEThcDiTCIDpeptide_EThcDpd2	49.45	1	14150	18.4	2.1e-05	2	37655	HUMAN	Immunoglobulin heavy constant alpha 1
[2]		P01876	118	854.058	6	-3.4	LSLHRPALEDLLLGSEANLTCTLTGLR	HexNAc5Hex5Fuc2+Cation:K@18	glycopepnew_HCDEThcDiTCIDpeptide_EThcDpd2	48.233	1	13744	29.8	1.4e-10	2	37655	HUMAN	Immunoglobulin heavy constant alpha 1
[2]		P01876	118	1016.88	5	2.7	LSLHRPALEDLLLGSEANLTCTLTGLR	HexNAc5Hex5NeuAc@18	glycopepnew_HCDEThcDiTCIDpeptide_EThcDpd2	48.05	1	13689	60.4	1.5e-15	2	37655	HUMAN	Immunoglobulin heavy constant alpha 1
[2]		P01876	118	1049.49	5	-5.3	LSLHRPALEDLLLGSEANLTCTLTGLR	HexNAc5Hex6Fuc2@18	glycopepnew_HCDEThcDiTCIDpeptide_EThcDpd2	48.067	1	13691	37.2	4.5e-10	2	37655	HUMAN	Immunoglobulin heavy constant alpha 1
[2]		P01876	118	1088.08	5	-7.5	LSLHRPALEDLLLGSEANLTCTLTGLRD	HexNAc6Hex5NeuAc+Cation:K@18	glycopepnew_HCDEThcDiTCIDpeptide_EThcDpd2	52.383	1	15100	19	3.9e-08	2	37655	HUMAN	Immunoglobulin heavy constant alpha 1
[6]		P02763	69	1006.45	4	6.8	LVPVPITNATLDQITGK	HexNAc4Hex5NeuAc2+Cation:K@8	glycopepnew_HCDEThcDiTCIDpeptide_EThcDpd2	49.95	1	14300	28.6	2e-10	1	23511.8	HUMAN	Alpha-1-acid glycoprotein 1
[6]		P02763	69	1134.24	4	-1.9	LVPVPITNATLDQITGK	HexNAc5Hex6FucNeuAc2+Cation:K@8	glycopepnew_HCDEThcDiTCIDpeptide_EThcDpd2	48.817	1	13943	13.1	2.1e-06	1	23511.8	HUMAN	Alpha-1-acid glycoprotein 1
[6]		P02763	69	965.812	5	-0.59	LVPVPITNATLDQITGK	HexNAc5Hex6FucNeuAc3+Cation:K@8	glycopepnew_HCDEThcDiTCIDpeptide_EThcDpd2	57.45	2	16722	28.4	6e-11	1	23511.8	HUMAN	Alpha-1-acid glycoprotein 1
[6]		P02763	69	1015.46	4	1.7	LVPVPITNATLDQITGK	HexNAc5Hex6NeuAc@8	glycopepnew_HCDEThcDiTCIDpeptide_EThcDpd2	42.95	1	11997	40	3.9e-10	1	23511.8	HUMAN	Alpha-1-acid glycoprotein 1
[6]		P02763	69	1088.24	4	1.1	LVPVPITNATLDQITGK	HexNAc5Hex6NeuAc2@8	glycopepnew_HCDEThcDiTCIDpeptide_EThcDpd2	49.517	1	14169	28.5	3.5e-10	1	23511.8	HUMAN	Alpha-1-acid glycoprotein 1
[6]		P02763	69	1097.73	4	-0.33	LVPVPITNATLDQITGK	HexNAc5Hex6NeuAc2+Cation:K@8	glycopepnew_HCDEThcDiTCIDpeptide_EThcDpd2	49.017	2	14002	50.2	3e-16	1	23511.8	HUMAN	Alpha-1-acid glycoprotein 1
[6]		P02763	69	1161.01	4	2.8	LVPVPITNATLDQITGK	HexNAc5Hex6NeuAc3@8	glycopepnew_HCDEThcDiTCIDpeptide_EThcDpd2	58.017	2	16895	28.7	1.8e-08	1	23511.8	HUMAN	Alpha-1-acid glycoprotein 1
[6]		P02763	69	1170.5	4	0.06	LVPVPITNATLDQITGK	HexNAc5Hex6NeuAc3+Cation:K@8	glycopepnew_HCDEThcDiTCIDpeptide_EThcDpd2	57.75	3	16810	42.9	5.3e-15	1	23511.8	HUMAN	Alpha-1-acid glycoprotein 1
[6]		P02763	69	1252.29	4	-0.73	LVPVPITNATLDQITGK	HexNAc6Hex7NeuAc3@8	glycopepnew_HCDEThcDiTCIDpeptide_EThcDpd2	56.767	1	16500	19.5	3e-06	1	23511.8	HUMAN	Alpha-1-acid glycoprotein 1
[6-1]	24	P19652	58	904.154	4	1.8	LVPVPITNATLDR	HexNAc4Hex5NeuAc2@8	glycopepnew_HCDEThcDiTCIDpeptide_EThcDpd2	42.5	1	11851	41.8	1.8e-09	1	23602.8	HUMAN	Alpha-1-acid glycoprotein 2
[6-1]	24	P19652	58	913.64	4	-2	LVPVPITNATLDR	HexNAc4Hex5NeuAc2+Cation:K@8	glycopepnew_HCDEThcDiTCIDpeptide_EThcDpd2	42.633	1	11886	40	3.5e-13	1	23602.8	HUMAN	Alpha-1-acid glycoprotein 2
[6-1]	24	P19652	58	859.374	4	-3.3	LVPVPITNATLDR	HexNAc5Hex6+Cation:K@8	glycopepnew_HCDEThcDiTCIDpeptide_EThcDpd2	30.667	2	7823	32.8	1.8e-09	1	23602.8	HUMAN	Alpha-1-acid glycoprotein 2
[6-1]	24	P19652	58	995.686	4	-4.3	LVPVPITNATLDR	HexNAc5Hex6Fuc2NeuAc@8	glycopepnew_HCDEThcDiTCIDpeptide_EThcDpd2	41.833	1	11609	17.7	8e-05	1	23602.8	HUMAN	Alpha-1-acid glycoprotein 2
[6-1]	24	P19652	58	995.434	4	-1.1	LVPVPITNATLDR	HexNAc5Hex6NeuAc2@8	glycopepnew_HCDEThcDiTCIDpeptide_EThcDpd2	41.9	1	11636	35	2.8e-10	1	23602.8	HUMAN	Alpha-1-acid glycoprotein 2
[6-1]	24	P19652	58	1004.92	4	-4.2	LVPVPITNATLDR	HexNAc5Hex6NeuAc2+Cation:K@8	glycopepnew_HCDEThcDiTCIDpeptide_EThcDpd2	41.833	2	11611	55.6	4.3e-12	1	23602.8	HUMAN	Alpha-1-acid glycoprotein 2
[6-1]	24	P19652	58	1068.21	4	1.2	LVPVPITNATLDR	HexNAc5Hex6NeuAc3@8	glycopepnew_HCDEThcDiTCIDpeptide_EThcDpd2	50.017	1	14321	34.9	1e-09	1	23602.8	HUMAN	Alpha-1-acid glycoprotein 2
[6-1]	24	P19652	58	1077.7	4	-0.94	LVPVPITNATLDR	HexNAc5Hex6NeuAc3+Cation:K@8	glycopepnew_HCDEThcDiTCIDpeptide_EThcDpd2	50.733	2	14557	43	3.1e-09	1	23602.8	HUMAN	Alpha-1-acid glycoprotein 2
[6-1]	24	P19652	58	1096.46	4	-3.1	LVPVPITNATLDR	HexNAc6Hex7Fuc2NeuAc+Cation:K@8	glycopepnew_HCDEThcDiTCIDpeptide_EThcDpd2	41.633	2	11551	17.3	0.00013	1	23602.8	HUMAN	Alpha-1-acid glycoprotein 2
[6-1]	24	P19652	58	1169.23	4	-4.8	LVPVPITNATLDR	HexNAc6Hex7Fuc2NeuAc2+Cation:K@8	glycopepnew_HCDEThcDiTCIDpeptide_EThcDpd2	49.083	2	14020	17.6	5.1e-06	1	23602.8	HUMAN	Alpha-1-acid glycoprotein 2
[6-1]	24	P19652	58	1168.98	4	-2.4	LVPVPITNATLDR	HexNAc6Hex7NeuAc3+Cation:K@8	glycopepnew_HCDEThcDiTCIDpeptide_EThcDpd2	49.967	1	14304	16.6	9.8e-05	1	23602.8	HUMAN	Alpha-1-acid glycoprotein 2
[6-1]	24	P19652	58	1105.22	4	-7.9	LVPVPITNATLDR	HexNAc7Hex8NeuAc@8	glycopepnew_HCDEThcDiTCIDpeptide_EThcDpd2	50.283	1	14409	16.1	0.00019	1	23602.8	HUMAN	Alpha-1-acid glycoprotein 2
[6-1]	24	P19652	58	1114.71	4	-1.6	LVPVPITNATLDR	HexNAc7Hex8NeuAc+Cation:K@8	glycopepnew_HCDEThcDiTCIDpeptide_EThcDpd2	50.35	2	14436	23.5	3.6e-09	1	23602.8	HUMAN	Alpha-1-acid glycoprotein 2
[24]		Q96PD5	4	1394.14	4	1.3	LYHFLLGAWSLNATELDPCPLSPELLGLTK	HexNAc4Hex5NeuAc2@12	glycopepnew_HCDEThcDiTCIDpeptide_EThcDpd2	62.167	2	18243	34.6	1.2e-11	1	62217.6	HUMAN	N-acetylmuramoyl-L-alanine amidase
[15]		P00734	10	1142.48	4	-5.9	LYPPWDKNFTENDLLVR	HexNAc5Hex5Fuc2NeuAc+Cation:K@8	glycopepnew_HCDEThcDiTCIDpeptide_EThcDpd2	40	2	10983	10.8	0.00017	1	70037.5	HUMAN	Prothrombin
[11]		P08185	21	918.367	4	1.9	MDPNAAYVNMSNHHR	HexNAc4Hex4FucNeuAc&Oxidation@(9&10)||HexNAc4Hex5NeuAc@9	glycopepnew_HCDEThcDiTCIDpeptide_EThcDpd2	19.317	1	4078	28.7	1.2e-11	1	45141.3	HUMAN	Corticosteroid-binding globulin
[11]		P08185	21	1027.9	4	-1.9	MDPNAAYVNMSNHHR	HexNAc4Hex5Fuc3NeuAc@9||HexNAc9Hex3+Cation:K@9	glycopepnew_HCDEThcDiTCIDpeptide_EThcDpd2	23.817	2	5616	33.9	1.1e-09	1	45141.3	HUMAN	Corticosteroid-binding globulin
[11]		P08185	21	991.141	4	1.9	MDPNAAYVNMSNHHR	HexNAc4Hex5NeuAc2@9	glycopepnew_HCDEThcDiTCIDpeptide_EThcDpd2	22.517	2	5178	44.9	2.5e-09	1	45141.3	HUMAN	Corticosteroid-binding globulin
[11]		P08185	21	800.703	5	-1.3	MDPNAAYVNMSNHHR	HexNAc4Hex5NeuAc2+Cation:K@9=28	glycopepnew_HCDEThcDiTCIDpeptide_EThcDpd2	22.5	1	5171	59.4	6e-19	1	45141.3	HUMAN	Corticosteroid-binding globulin
[11]		P08185	21	1155.2	4	1.5	MDPNAAYVNMSNHHR	HexNAc5Hex6NeuAc3@9	glycopepnew_HCDEThcDiTCIDpeptide_EThcDpd2	26.4	1	6453	18.9	1.1e-06	1	45141.3	HUMAN	Corticosteroid-binding globulin
[11]		P08185	21	995.386	4	-7.8	MDPNAAYVNMSNHHR	Oxidation@1=18;HexNAc4Hex5Fuc2NeuAc@9=18	glycopepnew_HCDEThcDiTCIDpeptide_EThcDpd2	19.467	1	4127	24.3	3.3e-08	1	45141.3	HUMAN	Corticosteroid-binding globulin
[1]		P01009	129	1328.55	3	-7.3	MKYLGNATAIFFLPDEGK	HexNAc4Hex5Fuc2+Cation:K&Oxidation@(6&1)||HexNAc4Hex6Fuc+Cation:K@6	glycopepnew_HCDEThcDiTCIDpeptide_EThcDpd2	56.417	1	16393	16.8	3.8e-07	1	46736.9	HUMAN	Alpha-1-antitrypsin
[11]		P08185	21	1287.97	5	-4.4	MLQSSTISYLHDSELPCQLVQMNYVGNGTVFFILPDK	HexNAc6Hex5Fuc&Oxidation@(27&22)||HexNAc6Hex6@27	glycopepnew_HCDEThcDiTCIDpeptide_EThcDpd2	58.633	1	17092	24.6	5.3e-08	1	45141.3	HUMAN	Corticosteroid-binding globulin
[19]		O75882	9	1287.28	4	-2.6	MPSQAPTGNFYPQPLLNSSMCLEDSR	HexNAc4Hex5Fuc2NeuAc@17	glycopepnew_HCDEThcDiTCIDpeptide_EThcDpd2	49.167	3	14049	27.2	9.5e-09	1	158538	HUMAN	Attractin
[19]		O75882	9	1297.02	4	-7.6	MPSQAPTGNFYPQPLLNSSMCLEDSR	HexNAc4Hex5Fuc4+Cation:K@17=9	glycopepnew_HCDEThcDiTCIDpeptide_EThcDpd2	49.183	1	14054	25.1	1.3e-09	1	158538	HUMAN	Attractin
[19]		O75882	9	1287.03	4	0.9	MPSQAPTGNFYPQPLLNSSMCLEDSR	HexNAc4Hex5NeuAc2@17	glycopepnew_HCDEThcDiTCIDpeptide_EThcDpd2	49.217	2	14068	21.2	1.8e-06	1	158538	HUMAN	Attractin
[5]		P01023	66	1286.58	4	-5.9	MVLFAPNIYVLDYLNETQQLTPEIK	HexNAc6Hex6@15	glycopepnew_HCDEThcDiTCIDpeptide_EThcDpd2	67.5	2	19925	13	5.1e-05	1	163292	HUMAN	Alpha-2-macroglobulin
[3]		P00738	93	939.794	5	-0.48	MVSHHNLTTGATLINEQW	HexNAc4Hex5Fuc3NeuAc2@6	glycopepnew_HCDEThcDiTCIDpeptide_EThcDpd2	35.783	1	9551	10.6	0.00019	1	45205.7	HUMAN	Haptoglobin
[3]		P00738	93	993.828	5	-0.6	MVSHHNLTTGATLINEQWLLT	Oxidation@1;HexNAc5Hex5FucNeuAc2@6=20;Oxidation@18=20	glycopepnew_HCDEThcDiTCIDpeptide_EThcDpd2	39.2	1	10707	16	6.7e-05	1	45205.7	HUMAN	Haptoglobin
[3]		P00738	93	721.374	4	1.3	MVSHHNLTTGATLINEQWLLTTAK	HexNAc@6	glycopepnew_HCDEThcDiTCIDpeptide_EThcDpd2	33.733	1	8863	79.7	1.9e-15	1	45205.7	HUMAN	Haptoglobin
[3]		P00738	93	1057.74	4	2	MVSHHNLTTGATLINEQWLLTTAK	HexNAc3Hex4NeuAc@6	glycopepnew_HCDEThcDiTCIDpeptide_EThcDpd2	36.217	1	9694	21.6	4.4e-06	1	45205.7	HUMAN	Haptoglobin
[3]		P00738	93	1076.25	4	0.88	MVSHHNLTTGATLINEQWLLTTAK	HexNAc4Hex5@6=21	glycopepnew_HCDEThcDiTCIDpeptide_EThcDpd2	32.617	2	8482	77	7.4e-22	1	45205.7	HUMAN	Haptoglobin
[3]		P00738	93	1149.28	4	-1.9	MVSHHNLTTGATLINEQWLLTTAK	HexNAc4Hex5Fuc2@6	glycopepnew_HCDEThcDiTCIDpeptide_EThcDpd2	46.917	1	13328	38.1	2.6e-12	1	45205.7	HUMAN	Haptoglobin
[3]		P00738	93	927.21	5	-5	MVSHHNLTTGATLINEQWLLTTAK	HexNAc4Hex5Fuc2+Cation:K@6	glycopepnew_HCDEThcDiTCIDpeptide_EThcDpd2	37.567	1	10153	25.2	9e-10	1	45205.7	HUMAN	Haptoglobin
[3]		P00738	93	1226.05	4	-1	MVSHHNLTTGATLINEQWLLTTAK	HexNAc4Hex5Fuc2NeuAc&Oxidation@(6&18)||HexNAc4Hex6FucNeuAc@6	glycopepnew_HCDEThcDiTCIDpeptide_EThcDpd2	37.15	1	10011	21.9	8e-07	1	45205.7	HUMAN	Haptoglobin
[3]		P00738	93	1222.05	4	-4.8	MVSHHNLTTGATLINEQWLLTTAK	HexNAc4Hex5Fuc2NeuAc@6	glycopepnew_HCDEThcDiTCIDpeptide_EThcDpd2	81.133	1	24253	40.9	4.3e-14	1	45205.7	HUMAN	Haptoglobin
[3]		P00738	93	1231.53	4	-6.5	MVSHHNLTTGATLINEQWLLTTAK	HexNAc4Hex5Fuc2NeuAc+Cation:K@6	glycopepnew_HCDEThcDiTCIDpeptide_EThcDpd2	40.233	1	11065	33.5	7.1e-10	1	45205.7	HUMAN	Haptoglobin
[3]		P00738	93	1222.3	4	-7.9	MVSHHNLTTGATLINEQWLLTTAK	HexNAc4Hex5Fuc4@6=29	glycopepnew_HCDEThcDiTCIDpeptide_EThcDpd2	45.5	1	12853	33.3	1.6e-10	1	45205.7	HUMAN	Haptoglobin
[3]		P00738	93	985.631	5	-7.2	MVSHHNLTTGATLINEQWLLTTAK	HexNAc4Hex5Fuc4+Cation:K@6=28	glycopepnew_HCDEThcDiTCIDpeptide_EThcDpd2	40.417	1	11127	28.2	5.8e-09	1	45205.7	HUMAN	Haptoglobin
[3]		P00738	93	1185.53	4	-2.8	MVSHHNLTTGATLINEQWLLTTAK	HexNAc4Hex5FucNeuAc@6=43	glycopepnew_HCDEThcDiTCIDpeptide_EThcDpd2	35.867	1	9577	49.5	1.9e-16	1	45205.7	HUMAN	Haptoglobin
[3]		P00738	93	1149.02	4	-0.29	MVSHHNLTTGATLINEQWLLTTAK	HexNAc4Hex5NeuAc@6=20	glycopepnew_HCDEThcDiTCIDpeptide_EThcDpd2	36.95	1	9946	72.5	1.9e-19	1	45205.7	HUMAN	Haptoglobin
[3]		P00738	93	1153.02	4	2.5	MVSHHNLTTGATLINEQWLLTTAK	HexNAc4Hex5NeuAc@6=28;Oxidation@18=100	glycopepnew_HCDEThcDiTCIDpeptide_EThcDpd2	33.217	1	8686	53.6	1.9e-16	1	45205.7	HUMAN	Haptoglobin
[3]		P00738	93	1158.51	4	-3	MVSHHNLTTGATLINEQWLLTTAK	HexNAc4Hex5NeuAc+Cation:K@6=41	glycopepnew_HCDEThcDiTCIDpeptide_EThcDpd2	35.8	1	9559	74	6.8e-27	1	45205.7	HUMAN	Haptoglobin
[3]		P00738	93	1221.8	4	0.2	MVSHHNLTTGATLINEQWLLTTAK	HexNAc4Hex5NeuAc2@6	glycopepnew_HCDEThcDiTCIDpeptide_EThcDpd2	71.7	1	21267	67.2	5.7e-25	1	45205.7	HUMAN	Haptoglobin
[3]		P00738	93	1225.79	4	-0.37	MVSHHNLTTGATLINEQWLLTTAK	HexNAc4Hex5NeuAc2@6;Oxidation@18=104	glycopepnew_HCDEThcDiTCIDpeptide_EThcDpd2	37.417	1	10101	47.5	4.7e-15	1	45205.7	HUMAN	Haptoglobin
[3]		P00738	93	1231.28	4	-2.9	MVSHHNLTTGATLINEQWLLTTAK	HexNAc4Hex5NeuAc2+Cation:K@6=31	glycopepnew_HCDEThcDiTCIDpeptide_EThcDpd2	39.767	2	10909	62.2	1.3e-20	1	45205.7	HUMAN	Haptoglobin
[3]		P00738	93	932.012	5	-5.6	MVSHHNLTTGATLINEQWLLTTAK	HexNAc5Hex3FucNeuAc+Cation:K@6	glycopepnew_HCDEThcDiTCIDpeptide_EThcDpd2	41.467	1	11492	11.8	3.7e-05	1	45205.7	HUMAN	Haptoglobin
[3]		P00738	93	1236.55	4	-6.6	MVSHHNLTTGATLINEQWLLTTAK	HexNAc5Hex5Fuc3@6	glycopepnew_HCDEThcDiTCIDpeptide_EThcDpd2	40.083	3	11013	25.1	1.1e-07	1	45205.7	HUMAN	Haptoglobin
[3]		P00738	93	1246.04	4	-7.6	MVSHHNLTTGATLINEQWLLTTAK	HexNAc5Hex5Fuc3+Cation:K@6	glycopepnew_HCDEThcDiTCIDpeptide_EThcDpd2	41.3	1	11436	16.2	2.3e-05	1	45205.7	HUMAN	Haptoglobin
[3]		P00738	93	1309.08	4	-2.4	MVSHHNLTTGATLINEQWLLTTAK	HexNAc5Hex5FucNeuAc2@6	glycopepnew_HCDEThcDiTCIDpeptide_EThcDpd2	35.817	3	9565	13.3	1.9e-05	1	45205.7	HUMAN	Haptoglobin
[3]		P00738	93	1313.33	4	-1.4	MVSHHNLTTGATLINEQWLLTTAK	HexNAc5Hex6Fuc2NeuAc@6	glycopepnew_HCDEThcDiTCIDpeptide_EThcDpd2	39.717	2	10895	28.5	3.6e-10	1	45205.7	HUMAN	Haptoglobin
[3]		P00738	93	1322.82	4	-6.2	MVSHHNLTTGATLINEQWLLTTAK	HexNAc5Hex6Fuc2NeuAc+Cation:K@6	glycopepnew_HCDEThcDiTCIDpeptide_EThcDpd2	39.35	2	10766	22.1	9.8e-09	1	45205.7	HUMAN	Haptoglobin
[3]		P00738	93	982.438	5	4.4	MVSHHNLTTGATLINEQWLLTTAK	HexNAc6Hex6+Cation:K@6=29	glycopepnew_HCDEThcDiTCIDpeptide_EThcDpd2	39.783	1	10918	24.4	5.3e-09	1	45205.7	HUMAN	Haptoglobin
[3]		P00738	93	1386.6	4	-5.6	MVSHHNLTTGATLINEQWLLTTAK	HexNAc7Hex8Fuc@6	glycopepnew_HCDEThcDiTCIDpeptide_EThcDpd2	51.833	2	14918	22.8	1.9e-09	1	45205.7	HUMAN	Haptoglobin
[3]		P00738	93	1396.09	4	-5.7	MVSHHNLTTGATLINEQWLLTTAK	HexNAc7Hex8Fuc+Cation:K@6	glycopepnew_HCDEThcDiTCIDpeptide_EThcDpd2	44.15	2	12410	25.6	9e-10	1	45205.7	HUMAN	Haptoglobin
[3]		P00738	93	1229.79	4	-2.2	MVSHHNLTTGATLINEQWLLTTAK	Oxidation@1;HexNAc4Hex5NeuAc2@6;Oxidation@18	glycopepnew_HCDEThcDiTCIDpeptide_EThcDpd2	36.533	1	9805	17.8	1.5e-05	1	45205.7	HUMAN	Haptoglobin
[3]		P00738	93	1163.28	4	1.6	MVSHHNLTTGATLINEQWLLTTAK	Oxidation@1;HexNAc5Hex4NeuAc@6	glycopepnew_HCDEThcDiTCIDpeptide_EThcDpd2	35.667	2	9515	36.5	1.5e-12	1	45205.7	HUMAN	Haptoglobin
[3]		P00738	93	1317.08	4	0.89	MVSHHNLTTGATLINEQWLLTTAK	Oxidation@1;HexNAc5Hex6NeuAc2@6	glycopepnew_HCDEThcDiTCIDpeptide_EThcDpd2	38.783	1	10574	41.6	7.3e-15	1	45205.7	HUMAN	Haptoglobin
[3]		P00738	93	930.21	5	0.19	MVSHHNLTTGATLINEQWLLTTAK	Oxidation@1=150;HexNAc4Hex5NeuAc+Cation:K@6=86	glycopepnew_HCDEThcDiTCIDpeptide_EThcDpd2	35.35	1	9399	63.8	4.9e-23	1	45205.7	HUMAN	Haptoglobin
[3]		P00738	93	1157.02	4	1.4	MVSHHNLTTGATLINEQWLLTTAK	Oxidation@1=16;HexNAc4Hex5NeuAc@6=16;Oxidation@18=16	glycopepnew_HCDEThcDiTCIDpeptide_EThcDpd2	33.167	3	8671	25.5	4.5e-08	1	45205.7	HUMAN	Haptoglobin
[3]		P00738	93	1222.3	4	-3	MVSHHNLTTGATLINEQWLLTTAK	Oxidation@1=16;HexNAc6Hex6@6=47	glycopepnew_HCDEThcDiTCIDpeptide_EThcDpd2	39.167	2	10699	24.4	2.3e-08	1	45205.7	HUMAN	Haptoglobin
[3]		P00738	93	1317.33	4	-2.2	MVSHHNLTTGATLINEQWLLTTAK	Oxidation@1=24;HexNAc5Hex6Fuc2NeuAc@6=24	glycopepnew_HCDEThcDiTCIDpeptide_EThcDpd2	39.033	2	10648	13.9	5.3e-06	1	45205.7	HUMAN	Haptoglobin
[3]		P00738	93	1262.81	4	0.74	MVSHHNLTTGATLINEQWLLTTAK	Oxidation@1=32;HexNAc6Hex7@6=43	glycopepnew_HCDEThcDiTCIDpeptide_EThcDpd2	39.55	2	10833	15.5	4.4e-06	1	45205.7	HUMAN	Haptoglobin
[3]		P00738	93	1313.08	4	1.7	MVSHHNLTTGATLINEQWLLTTAK	Oxidation@1=34;HexNAc5Hex5FucNeuAc2@6=34	glycopepnew_HCDEThcDiTCIDpeptide_EThcDpd2	35.167	2	9347	27.2	8.5e-10	1	45205.7	HUMAN	Haptoglobin
[3]		P00738	93	1226.05	4	-2.4	MVSHHNLTTGATLINEQWLLTTAK	Oxidation@1=38;HexNAc4Hex5Fuc2NeuAc@6=38	glycopepnew_HCDEThcDiTCIDpeptide_EThcDpd2	39.383	1	10775	36.5	1.9e-11	1	45205.7	HUMAN	Haptoglobin
[3]		P00738	93	1226.3	4	-5.2	MVSHHNLTTGATLINEQWLLTTAK	Oxidation@1=38;HexNAc4Hex5Fuc4@6=38	glycopepnew_HCDEThcDiTCIDpeptide_EThcDpd2	40.217	2	11060	38.1	4.3e-12	1	45205.7	HUMAN	Haptoglobin
[3]		P00738	93	824.025	6	-4.2	MVSHHNLTTGATLINEQWLLTTAK	Oxidation@1=48;HexNAc4Hex5Fuc2NeuAc+Cation:K@6=48	glycopepnew_HCDEThcDiTCIDpeptide_EThcDpd2	39.05	1	10657	23.4	1.3e-07	1	45205.7	HUMAN	Haptoglobin
[3]		P00738	93	1225.8	4	-0.27	MVSHHNLTTGATLINEQWLLTTAK	Oxidation@1=91;HexNAc4Hex5NeuAc2@6	glycopepnew_HCDEThcDiTCIDpeptide_EThcDpd2	40.3	2	11087	50.7	9.5e-15	1	45205.7	HUMAN	Haptoglobin
[3]		P00738	93	1157.27	4	-4.2	MVSHHNLTTGATLINEQWLLTTAK	Oxidation@18=14;HexNAc4Hex5Fuc2&Oxidation@(6&1)||HexNAc4Hex6Fuc@6	glycopepnew_HCDEThcDiTCIDpeptide_EThcDpd2	33.4	2	8746	24.2	5.1e-08	1	45205.7	HUMAN	Haptoglobin
[22]		P02765	6	1016.65	4	0.41	NAQNNGSNFQLEEISR	HexNAc4Hex5NeuAc2+Cation:K@5	glycopepnew_HCDEThcDiTCIDpeptide_EThcDpd2	35.633	1	9503	41	1.2e-13	1	39325	HUMAN	Alpha-2-HS-glycoprotein
[5]		P01023	66	1005.2	4	-6.3	NATTDEHGLVQFSINTTNVMGTSLTVR	HexNAc3Hex3@15=23;Oxidation@20	glycopepnew_HCDEThcDiTCIDpeptide_EThcDpd2	34.35	1	9065	14.6	0.00022	1	163292	HUMAN	Alpha-2-macroglobulin
[6]		P02763	69	888.319	4	-3.1	NEEYNK	HexNAc5Hex6FucNeuAc2+Cation:K@5	glycopepnew_HCDEThcDiTCIDpeptide_EThcDpd2	15.6	1	2774	16.2	2e-06	2	23511.8	HUMAN	Alpha-1-acid glycoprotein 1
[6]		P02763	69	924.581	4	-0.65	NEEYNK	HexNAc5Hex6NeuAc3+Cation:K@5	glycopepnew_HCDEThcDiTCIDpeptide_EThcDpd2	19.367	1	4093	19.1	8.7e-07	2	23511.8	HUMAN	Alpha-1-acid glycoprotein 1
[5]		P01023	66	1176.23	4	-3.5	NETVTVSASLESVR	HexNAc6Hex6FucNeuAc3@1	glycopepnew_HCDEThcDiTCIDpeptide_EThcDpd2	67.15	1	19811	12.2	0.00019	1	163292	HUMAN	Alpha-2-macroglobulin
[5]		P01023	66	878.573	5	0.82	NETVTVSASLESVRGNR	HexNAc5Hex6NeuAc2@16	glycopepnew_HCDEThcDiTCIDpeptide_EThcDpd2	58.167	1	16940	10.4	0.00021	1	163292	HUMAN	Alpha-2-macroglobulin
[13]		P01008	13	1111.95	4	5.3	NETYQDISELVYGAK	HexNAc6Hex9+Cation:K@1	glycopepnew_HCDEThcDiTCIDpeptide_EThcDpd2	60.3	1	17630	46.3	8.1e-14	1	52602.9	HUMAN	Antithrombin-III
[15]		P00734	10	793.82	4	-0.84	NFTENDLLVR	HexNAc4Hex5NeuAc+Cation:K@1	glycopepnew_HCDEThcDiTCIDpeptide_EThcDpd2	33.567	1	8806	34.3	1.3e-09	1	70037.5	HUMAN	Prothrombin
[15]		P00734	10	866.593	4	-1.5	NFTENDLLVR	HexNAc4Hex5NeuAc2+Cation:K@1	glycopepnew_HCDEThcDiTCIDpeptide_EThcDpd2	40.417	2	11129	40.3	7.6e-12	1	70037.5	HUMAN	Prothrombin
[19]		O75882	9	935.626	4	0.98	NHSCSEGQISIFR	HexNAc4Hex5NeuAc2@1	glycopepnew_HCDEThcDiTCIDpeptide_EThcDpd2	29.683	2	7508	41.8	1e-11	1	158538	HUMAN	Attractin
[40]		P04004	1	1003.82	5	-0.47	NISDGFDGIPDNVDAALALPAHSYSGR	HexNAc4Hex5NeuAc2+Cation:K@1	glycopepnew_HCDEThcDiTCIDpeptide_EThcDpd2	49.25	1	14080	62	9.5e-22	1	54306.1	HUMAN	Vitronectin
[3]		P00738	93	916.634	4	1.7	NLFLNHSENATAK	HexNAc4Hex5NeuAc2@5=63	glycopepnew_HCDEThcDiTCIDpeptide_EThcDpd2	24.833	1	5950	43.3	1.3e-14	1	45205.7	HUMAN	Haptoglobin
[3]		P00738	93	1120.63	5	-4.9	NLFLNHSENATAK	HexNAc8Hex9FucNeuAc3+Cation:K@5|9	glycopepnew_HCDEThcDiTCIDpeptide_EThcDpd2	22.65	1	5224	12.6	9.5e-05	1	45205.7	HUMAN	Haptoglobin
[1]		P01009	129	1195.7	5	2.3	NLTEIPEAQIHEGFQELLR	HexNAc7Hex8FucNeuAc3@1	glycopepnew_HCDEThcDiTCIDpeptide_EThcDpd2	57.9	2	16858	16	3.1e-06	1	46736.9	HUMAN	Alpha-1-antitrypsin
[1]		P01009	129	1326.95	5	-0.47	NLTEIPEAQIHEGFQELLR	HexNAc8Hex9FucNeuAc4@1	glycopepnew_HCDEThcDiTCIDpeptide_EThcDpd2	62.283	1	18277	29.8	1.8e-06	1	46736.9	HUMAN	Alpha-1-antitrypsin
[17]		P01011	12	1152	4	1.1	NLTETSEAEIHQSFQHLLR	HexNAc4Hex5Fuc3NeuAc@1||HexNAc9Hex3+Cation:K@1	glycopepnew_HCDEThcDiTCIDpeptide_EThcDpd2	43.217	1	12097	15.2	2.9e-06	1	47651.3	HUMAN	Alpha-1-antichymotrypsin
[3]		P00738	93	1232.29	4	-0.096	NLTTGATLINEQWLLTTAK	HexNAc9Hex6+Cation:K@1	glycopepnew_HCDEThcDiTCIDpeptide_EThcDpd2	40.717	2	11237	23.9	7.5e-08	1	45205.7	HUMAN	Haptoglobin
[34]		P05155	3	1009.9	4	-7.5	NPNATSSSSQDPESLQDRGEGK	HexNAc3Hex4FucNeuAc+Cation:K@3	glycopepnew_HCDEThcDiTCIDpeptide_EThcDpd2	55.25	1	16024	10.5	8.2e-05	1	55154.7	HUMAN	Plasma protease C1 inhibitor
[5]		P01023	66	1102.48	4	-1.2	NQTLSLFFTVLQDVPVR	HexNAc5Hex4FucNeuAc2+Cation:K@1	glycopepnew_HCDEThcDiTCIDpeptide_EThcDpd2	67.433	1	19899	31.2	2.6e-10	1	163292	HUMAN	Alpha-2-macroglobulin
[5]		P01023	66	1257.05	4	4.9	NQTLSLFFTVLQDVPVR	HexNAc6Hex5FucNeuAc3@1	glycopepnew_HCDEThcDiTCIDpeptide_EThcDpd2	78.35	2	23402	24.4	2.4e-07	1	163292	HUMAN	Alpha-2-macroglobulin
[5]		P01023	66	1266.54	4	4.8	NQTLSLFFTVLQDVPVR	HexNAc6Hex5FucNeuAc3+Cation:K@1	glycopepnew_HCDEThcDiTCIDpeptide_EThcDpd2	77.433	1	23110	25.1	1.8e-10	1	163292	HUMAN	Alpha-2-macroglobulin
[1]		P01009	129	1363.84	4	2.7	NSTNIFFSPVSIATAFAMLSLGTK	HexNAc6Hex7NeuAc2@1=41	glycopepnew_HCDEThcDiTCIDpeptide_EThcDpd2	68.233	2	20147	30.5	1.6e-07	1	46736.9	HUMAN	Alpha-1-antitrypsin
[6]		P02763	69	1364.27	4	-1.7	NTTYLNVQR	HexNAc11Hex11NeuAc+Cation:K@1	glycopepnew_HCDEThcDiTCIDpeptide_EThcDpd2	46.05	2	13048	13	6.9e-05	1	23511.8	HUMAN	Alpha-1-acid glycoprotein 1
[17]		P01011	12	1083.91	5	-0.81	NVIFSPLSISTALAFLSLGAHNTTLTEILK	HexNAc4Hex5Fuc2NeuAc+Cation:K@22	glycopepnew_HCDEThcDiTCIDpeptide_EThcDpd2	69.85	1	20666	25.4	2.2e-09	1	47651.3	HUMAN	Alpha-1-antichymotrypsin
[2]		P01876	118	894.172	4	1.7	PALEDLLLGSEANLTCTLTGLR	HexNAc2Hex5@13	glycopepnew_HCDEThcDiTCIDpeptide_EThcDpd2	52.467	2	15133	39	2.7e-09	2	37655	HUMAN	Immunoglobulin heavy constant alpha 1
[2]		P01876	118	903.66	4	0.88	PALEDLLLGSEANLTCTLTGLR	HexNAc2Hex5+Cation:K@13	glycopepnew_HCDEThcDiTCIDpeptide_EThcDpd2	52.483	1	15135	36.7	9.4e-10	2	37655	HUMAN	Immunoglobulin heavy constant alpha 1
[2]		P01876	118	934.683	4	-0.59	PALEDLLLGSEANLTCTLTGLR	HexNAc2Hex6@13	glycopepnew_HCDEThcDiTCIDpeptide_EThcDpd2	32.883	2	8578	22.8	0.00014	2	37655	HUMAN	Immunoglobulin heavy constant alpha 1
[2]		P01876	118	1205.57	3	3.6	PALEDLLLGSEANLTCTLTGLR	HexNAc3Hex4@13	glycopepnew_HCDEThcDiTCIDpeptide_EThcDpd2	57.967	1	16876	40.2	2.6e-11	2	37655	HUMAN	Immunoglobulin heavy constant alpha 1
[2]		P01876	118	977.452	4	-4.2	PALEDLLLGSEANLTCTLTGLR	HexNAc3Hex4Fuc2@13	glycopepnew_HCDEThcDiTCIDpeptide_EThcDpd2	58.717	1	17119	15.8	0.00021	2	37655	HUMAN	Immunoglobulin heavy constant alpha 1
[2]		P01876	118	977.202	4	0.42	PALEDLLLGSEANLTCTLTGLR	HexNAc3Hex4NeuAc@13	glycopepnew_HCDEThcDiTCIDpeptide_EThcDpd2	58.5	1	17050	48.8	4.2e-11	2	37655	HUMAN	Immunoglobulin heavy constant alpha 1
[2]		P01876	118	986.688	4	-2.4	PALEDLLLGSEANLTCTLTGLR	HexNAc3Hex4NeuAc+Cation:K@13	glycopepnew_HCDEThcDiTCIDpeptide_EThcDpd2	58.533	1	17058	48.9	1.7e-12	2	37655	HUMAN	Immunoglobulin heavy constant alpha 1
[2]		P01876	118	1017.72	4	2.4	PALEDLLLGSEANLTCTLTGLR	HexNAc3Hex5NeuAc@13	glycopepnew_HCDEThcDiTCIDpeptide_EThcDpd2	58.333	1	17000	45.2	1.5e-09	2	37655	HUMAN	Immunoglobulin heavy constant alpha 1
[2]		P01876	118	1273.26	3	-3.1	PALEDLLLGSEANLTCTLTGLR	HexNAc4Hex4@13	glycopepnew_HCDEThcDiTCIDpeptide_EThcDpd2	52.35	2	15092	24.6	5.4e-07	2	37655	HUMAN	Immunoglobulin heavy constant alpha 1
[2]		P01876	118	1037.71	4	-5.1	PALEDLLLGSEANLTCTLTGLR	HexNAc4Hex4Fuc2+Cation:K@13	glycopepnew_HCDEThcDiTCIDpeptide_EThcDpd2	58.733	1	17126	13.6	0.00016	2	37655	HUMAN	Immunoglobulin heavy constant alpha 1
[2]		P01876	118	1073.98	4	6.6	PALEDLLLGSEANLTCTLTGLR	HexNAc4Hex4FucNeuAc+Cation:K@13	glycopepnew_HCDEThcDiTCIDpeptide_EThcDpd2	58.45	1	17035	37.4	2e-11	2	37655	HUMAN	Immunoglobulin heavy constant alpha 1
[2]		P01876	118	1146.75	4	4.3	PALEDLLLGSEANLTCTLTGLR	HexNAc4Hex4FucNeuAc2+Cation:K@13	glycopepnew_HCDEThcDiTCIDpeptide_EThcDpd2	65.5	1	19284	54.3	2.3e-18	2	37655	HUMAN	Immunoglobulin heavy constant alpha 1
[2]		P01876	118	1027.97	4	2.8	PALEDLLLGSEANLTCTLTGLR	HexNAc4Hex4NeuAc@13	glycopepnew_HCDEThcDiTCIDpeptide_EThcDpd2	58.217	1	16961	52	2.5e-13	2	37655	HUMAN	Immunoglobulin heavy constant alpha 1
[2]		P01876	118	1037.46	4	-0.98	PALEDLLLGSEANLTCTLTGLR	HexNAc4Hex4NeuAc+Cation:K@13	glycopepnew_HCDEThcDiTCIDpeptide_EThcDpd2	58.417	2	17028	38.9	1.4e-12	2	37655	HUMAN	Immunoglobulin heavy constant alpha 1
[2]		P01876	118	1327.28	3	0.36	PALEDLLLGSEANLTCTLTGLR	HexNAc4Hex5@13	glycopepnew_HCDEThcDiTCIDpeptide_EThcDpd2	58.067	1	16909	26.1	1.5e-10	2	37655	HUMAN	Immunoglobulin heavy constant alpha 1
[2]		P01876	118	1005.2	4	-1.3	PALEDLLLGSEANLTCTLTGLR	HexNAc4Hex5+Cation:K@13	glycopepnew_HCDEThcDiTCIDpeptide_EThcDpd2	58.4	1	17024	26.5	1.3e-08	2	37655	HUMAN	Immunoglobulin heavy constant alpha 1
[2]		P01876	118	1078.22	4	-8	PALEDLLLGSEANLTCTLTGLR	HexNAc4Hex5Fuc2+Cation:K@13	glycopepnew_HCDEThcDiTCIDpeptide_EThcDpd2	59.783	2	17455	21	5.5e-07	2	37655	HUMAN	Immunoglobulin heavy constant alpha 1
[2]		P01876	118	1141.51	4	-2.8	PALEDLLLGSEANLTCTLTGLR	HexNAc4Hex5Fuc2NeuAc@13	glycopepnew_HCDEThcDiTCIDpeptide_EThcDpd2	69.367	1	20514	30.9	4.7e-10	2	37655	HUMAN	Immunoglobulin heavy constant alpha 1
[2]		P01876	118	1141.76	4	-5.3	PALEDLLLGSEANLTCTLTGLR	HexNAc4Hex5Fuc4@13	glycopepnew_HCDEThcDiTCIDpeptide_EThcDpd2	71.3	1	21148	19.5	2e-06	2	37655	HUMAN	Immunoglobulin heavy constant alpha 1
[2]		P01876	118	1177.77	4	1.8	PALEDLLLGSEANLTCTLTGLR	HexNAc4Hex5FucNeuAc2@13	glycopepnew_HCDEThcDiTCIDpeptide_EThcDpd2	65.433	1	19259	28.7	5.9e-07	2	37655	HUMAN	Immunoglobulin heavy constant alpha 1
[2]		P01876	118	1068.49	4	1.4	PALEDLLLGSEANLTCTLTGLR	HexNAc4Hex5NeuAc@13	glycopepnew_HCDEThcDiTCIDpeptide_EThcDpd2	58.65	1	17098	46	3.4e-10	2	37655	HUMAN	Immunoglobulin heavy constant alpha 1
[2]		P01876	118	1077.97	4	-2.1	PALEDLLLGSEANLTCTLTGLR	HexNAc4Hex5NeuAc+Cation:K@13	glycopepnew_HCDEThcDiTCIDpeptide_EThcDpd2	58.9	2	17180	44.8	3e-14	2	37655	HUMAN	Immunoglobulin heavy constant alpha 1
[2]		P01876	118	1141.26	4	-0.35	PALEDLLLGSEANLTCTLTGLR	HexNAc4Hex5NeuAc2@13	glycopepnew_HCDEThcDiTCIDpeptide_EThcDpd2	67.45	1	19903	40	6.3e-11	2	37655	HUMAN	Immunoglobulin heavy constant alpha 1
[2]		P01876	118	1150.75	4	-1.7	PALEDLLLGSEANLTCTLTGLR	HexNAc4Hex5NeuAc2+Cation:K@13	glycopepnew_HCDEThcDiTCIDpeptide_EThcDpd2	65.5	2	19286	59.2	3.9e-13	2	37655	HUMAN	Immunoglobulin heavy constant alpha 1
[2]		P01876	118	965.456	4	2.5	PALEDLLLGSEANLTCTLTGLR	HexNAc5Hex3@13	glycopepnew_HCDEThcDiTCIDpeptide_EThcDpd2	52.483	2	15140	45.2	1.3e-10	2	37655	HUMAN	Immunoglobulin heavy constant alpha 1
[2]		P01876	118	1084.24	4	6.6	PALEDLLLGSEANLTCTLTGLR	HexNAc5Hex3FucNeuAc+Cation:K@13	glycopepnew_HCDEThcDiTCIDpeptide_EThcDpd2	58.183	1	16948	54	5.2e-16	2	37655	HUMAN	Immunoglobulin heavy constant alpha 1
[2]		P01876	118	1005.97	4	0.88	PALEDLLLGSEANLTCTLTGLR	HexNAc5Hex4@13	glycopepnew_HCDEThcDiTCIDpeptide_EThcDpd2	52.183	1	15031	45.9	5.8e-10	2	37655	HUMAN	Immunoglobulin heavy constant alpha 1
[2]		P01876	118	1015.46	4	-1	PALEDLLLGSEANLTCTLTGLR	HexNAc5Hex4+Cation:K@13	glycopepnew_HCDEThcDiTCIDpeptide_EThcDpd2	52.25	2	15059	43.7	3.8e-12	2	37655	HUMAN	Immunoglobulin heavy constant alpha 1
[2]		P01876	118	1051.98	4	6.1	PALEDLLLGSEANLTCTLTGLR	HexNAc5Hex4Fuc+Cation:K@13	glycopepnew_HCDEThcDiTCIDpeptide_EThcDpd2	52.15	2	15023	37.3	1.9e-11	2	37655	HUMAN	Immunoglobulin heavy constant alpha 1
[2]		P01876	118	1078.74	4	1.8	PALEDLLLGSEANLTCTLTGLR	HexNAc5Hex4NeuAc@13	glycopepnew_HCDEThcDiTCIDpeptide_EThcDpd2	58.45	2	17037	34.9	8.6e-08	2	37655	HUMAN	Immunoglobulin heavy constant alpha 1
[2]		P01876	118	1046.48	4	0.93	PALEDLLLGSEANLTCTLTGLR	HexNAc5Hex5@13	glycopepnew_HCDEThcDiTCIDpeptide_EThcDpd2	51.967	2	14961	48	2e-12	2	37655	HUMAN	Immunoglobulin heavy constant alpha 1
[2]		P01876	118	1119.5	4	-5.5	PALEDLLLGSEANLTCTLTGLR	HexNAc5Hex5Fuc2@13	glycopepnew_HCDEThcDiTCIDpeptide_EThcDpd2	60.95	1	17835	29.1	1.1e-10	2	37655	HUMAN	Immunoglobulin heavy constant alpha 1
[2]		P01876	118	1228.54	4	0.65	PALEDLLLGSEANLTCTLTGLR	HexNAc5Hex5FucNeuAc2@13	glycopepnew_HCDEThcDiTCIDpeptide_EThcDpd2	65.517	2	19290	17.4	0.00019	2	37655	HUMAN	Immunoglobulin heavy constant alpha 1
[2]		P01876	118	1119.26	4	1.2	PALEDLLLGSEANLTCTLTGLR	HexNAc5Hex5NeuAc@13	glycopepnew_HCDEThcDiTCIDpeptide_EThcDpd2	58.017	1	16893	42.2	4.2e-10	2	37655	HUMAN	Immunoglobulin heavy constant alpha 1
[2]		P01876	118	1128.74	4	-1.5	PALEDLLLGSEANLTCTLTGLR	HexNAc5Hex5NeuAc+Cation:K@13	glycopepnew_HCDEThcDiTCIDpeptide_EThcDpd2	57.883	1	16850	35	1.2e-11	2	37655	HUMAN	Immunoglobulin heavy constant alpha 1
[2]		P01876	118	1192.03	4	-0.7	PALEDLLLGSEANLTCTLTGLR	HexNAc5Hex5NeuAc2@13	glycopepnew_HCDEThcDiTCIDpeptide_EThcDpd2	65.6	1	19316	21.6	3.7e-08	2	37655	HUMAN	Immunoglobulin heavy constant alpha 1
[3]		P00738	93	1107.71	4	1.9	PNYSQVDIGLIK	HexNAc6Hex7FucNeuAc2@2	glycopepnew_HCDEThcDiTCIDpeptide_EThcDpd2	39.283	2	10738	22	4.2e-06	1	45205.7	HUMAN	Haptoglobin
[3]		P00738	93	944.592	5	1.9	PNYSQVDIGLIK	HexNAc6Hex7FucNeuAc3@2	glycopepnew_HCDEThcDiTCIDpeptide_EThcDpd2	44.817	2	12628	32.8	7.2e-08	1	45205.7	HUMAN	Haptoglobin
[10-1]	16	P01859	20	952.406	3	-1.9	PREEQFNSTFR	HexNAc4Hex3Fuc@7	glycopepnew_HCDEThcDiTCIDpeptide_EThcDpd2	17.067	1	3300	13.7	1.8e-05	1	35901	HUMAN	Immunoglobulin heavy constant gamma 2
[6]		P02763	69	1209	4	2.8	PVPITNATLDQITGK	HexNAc6Hex7Fuc2NeuAc2+Cation:K@6	glycopepnew_HCDEThcDiTCIDpeptide_EThcDpd2	48.7	2	13900	17.4	1.1e-05	1	23511.8	HUMAN	Alpha-1-acid glycoprotein 1
[15]		P00734	10	1143.23	4	-0.049	PWDKNFTENDLLVR	HexNAc6Hex9Fuc@5	glycopepnew_HCDEThcDiTCIDpeptide_EThcDpd2	40.183	2	11047	12.6	5.5e-05	1	70037.5	HUMAN	Prothrombin
[3]		P00738	93	1391.86	4	-5.1	PWQAKMVSHHNLTTGATLINEQWLLTTAK	Oxidation@2;Oxidation@6;HexNAc4Hex5NeuAc2+Cation:K@11	glycopepnew_HCDEThcDiTCIDpeptide_EThcDpd2	43.967	1	12342	17.7	1.9e-05	1	45205.7	HUMAN	Haptoglobin
[3]		P00738	93	1386.35	4	-3.3	QAKMVSHHNLTTGATLINEQWLLTTAK	Gln->pyro-Glu@1=16;Oxidation@4=50;HexNAc6Hex7Fuc+Cation:K@9=16	glycopepnew_HCDEThcDiTCIDpeptide_EThcDpd2	45.667	1	12907	19.1	1.2e-07	1	45205.7	HUMAN	Haptoglobin
[6]		P02763	69	1218.73	4	3.9	QDQCIYNTTYLNVQR	Gln->pyro-Glu@1;HexNAc6Hex7NeuAc2+Cation:K@7	glycopepnew_HCDEThcDiTCIDpeptide_EThcDpd2	32.85	1	8559	13	4.7e-05	1	23511.8	HUMAN	Alpha-1-acid glycoprotein 1
[6]		P02763	69	1282.01	4	5.4	QDQCIYNTTYLNVQR	Gln->pyro-Glu@1;HexNAc6Hex7NeuAc3@7	glycopepnew_HCDEThcDiTCIDpeptide_EThcDpd2	38.317	2	10409	13.3	5.9e-05	1	23511.8	HUMAN	Alpha-1-acid glycoprotein 1
[6]		P02763	69	1291.5	4	1.3	QDQCIYNTTYLNVQR	Gln->pyro-Glu@1;HexNAc6Hex7NeuAc3+Cation:K@7	glycopepnew_HCDEThcDiTCIDpeptide_EThcDpd2	38.483	2	10470	11	5.6e-05	1	23511.8	HUMAN	Alpha-1-acid glycoprotein 1
[6]		P02763	69	1354.78	4	2.9	QDQCIYNTTYLNVQR	Gln->pyro-Glu@1;HexNAc6Hex7NeuAc4@7	glycopepnew_HCDEThcDiTCIDpeptide_EThcDpd2	46.4	1	13152	11.1	4.1e-05	1	23511.8	HUMAN	Alpha-1-acid glycoprotein 1
[6]		P02763	69	1058.92	4	-0.47	QDQCIYNTTYLNVQR	HexNAc5Hex6NeuAc+Cation:K@7=72	glycopepnew_HCDEThcDiTCIDpeptide_EThcDpd2	32.9	1	8581	49.8	1.1e-15	1	23511.8	HUMAN	Alpha-1-acid glycoprotein 1
[6]		P02763	69	1122.21	4	2	QDQCIYNTTYLNVQR	HexNAc5Hex6NeuAc2@7=34	glycopepnew_HCDEThcDiTCIDpeptide_EThcDpd2	38.417	2	10448	23	1.8e-08	1	23511.8	HUMAN	Alpha-1-acid glycoprotein 1
[6]		P02763	69	1194.98	4	2.2	QDQCIYNTTYLNVQR	HexNAc5Hex6NeuAc3@7=38	glycopepnew_HCDEThcDiTCIDpeptide_EThcDpd2	46.383	1	13144	25.3	3e-08	1	23511.8	HUMAN	Alpha-1-acid glycoprotein 1
[6]		P02763	69	1204.47	4	-1.7	QDQCIYNTTYLNVQR	HexNAc5Hex6NeuAc3+Cation:K@7=37	glycopepnew_HCDEThcDiTCIDpeptide_EThcDpd2	45.817	1	12958	25.3	1.2e-07	1	23511.8	HUMAN	Alpha-1-acid glycoprotein 1
[6]		P02763	69	1282.26	4	-1.5	QDQCIYNTTYLNVQR	HexNAc6Hex6FucNeuAc3@7	glycopepnew_HCDEThcDiTCIDpeptide_EThcDpd2	38.267	1	10387	30.6	2.8e-09	1	23511.8	HUMAN	Alpha-1-acid glycoprotein 1
[6]		P02763	69	1296	4	-6.2	QDQCIYNTTYLNVQR	HexNAc6Hex7Fuc2NeuAc2+Cation:K@7	glycopepnew_HCDEThcDiTCIDpeptide_EThcDpd2	45.65	3	12905	28.3	1.2e-09	1	23511.8	HUMAN	Alpha-1-acid glycoprotein 1
[6]		P02763	69	1368.77	4	-4.3	QDQCIYNTTYLNVQR	HexNAc6Hex7Fuc2NeuAc3+Cation:K@7	glycopepnew_HCDEThcDiTCIDpeptide_EThcDpd2	60.4	2	17665	30.2	5.2e-09	1	23511.8	HUMAN	Alpha-1-acid glycoprotein 1
[6]		P02763	69	1286.26	4	0.38	QDQCIYNTTYLNVQR	HexNAc6Hex7NeuAc3@7	glycopepnew_HCDEThcDiTCIDpeptide_EThcDpd2	45.917	2	12994	26.1	5.5e-10	1	23511.8	HUMAN	Alpha-1-acid glycoprotein 1
[6]		P02763	69	1359.04	4	0.95	QDQCIYNTTYLNVQR	HexNAc6Hex7NeuAc4@7	glycopepnew_HCDEThcDiTCIDpeptide_EThcDpd2	59.183	1	17271	26.1	6.3e-12	1	23511.8	HUMAN	Alpha-1-acid glycoprotein 1
[6]		P02763	69	1296.5	4	-7.5	QDQCIYNTTYLNVQR	HexNAc8Hex9Fuc+Cation:K@7	glycopepnew_HCDEThcDiTCIDpeptide_EThcDpd2	45.883	1	12983	39.1	1.5e-09	1	23511.8	HUMAN	Alpha-1-acid glycoprotein 1
[4]		P02787	67	948.774	5	-5.7	QHLFGSNVTDCSGNFCLFR	Gln->pyro-Glu@1;HexNAc9Hex3Fuc+Cation:K@7	glycopepnew_HCDEThcDiTCIDpeptide_EThcDpd2	37.75	1	10218	26.6	6.8e-10	1	77064.7	HUMAN	Serotransferrin
[1]		P01009	129	1235	4	-2.7	QLAHQSNSTNIFFSPV	HexNAc6Hex11Fuc@7	glycopepnew_HCDEThcDiTCIDpeptide_EThcDpd2	74.617	2	22214	11.8	4.2e-05	1	46736.9	HUMAN	Alpha-1-antitrypsin
[1]		P01009	129	1188.74	4	-0.84	QLAHQSNSTNIFFSPVSIATAF	Gln->pyro-Glu@1;HexNAc2Hex12+Cation:K@7||HexNAc4Hex5FucNeuAc2+Cation:K@7	glycopepnew_HCDEThcDiTCIDpeptide_EThcDpd2	78.15	1	23334	15.3	4.1e-05	1	46736.9	HUMAN	Alpha-1-antitrypsin
[1]		P01009	129	1148.24	4	5.5	QLAHQSNSTNIFFSPVSIATAF	Gln->pyro-Glu@1;HexNAc4Hex4FucNeuAc2+Cation:K@7	glycopepnew_HCDEThcDiTCIDpeptide_EThcDpd2	78.35	1	23397	16.9	9.7e-06	1	46736.9	HUMAN	Alpha-1-antitrypsin
[1]		P01009	129	1152.23	4	-0.91	QLAHQSNSTNIFFSPVSIATAF	Gln->pyro-Glu@1;HexNAc4Hex5NeuAc2+Cation:K@7	glycopepnew_HCDEThcDiTCIDpeptide_EThcDpd2	78.467	1	23438	19	1.2e-06	1	46736.9	HUMAN	Alpha-1-antitrypsin
[1]		P01009	129	1179.26	4	0.88	QLAHQSNSTNIFFSPVSIATAF	Gln->pyro-Glu@1=62;HexNAc4Hex5FucNeuAc2@7=62	glycopepnew_HCDEThcDiTCIDpeptide_EThcDpd2	78.05	2	23308	31.9	8.5e-13	1	46736.9	HUMAN	Alpha-1-antitrypsin
[1]		P01009	129	1142.74	4	1.6	QLAHQSNSTNIFFSPVSIATAF	Gln->pyro-Glu@1=66;HexNAc4Hex5NeuAc2@7=66	glycopepnew_HCDEThcDiTCIDpeptide_EThcDpd2	78.433	1	23424	34.3	8.3e-13	1	46736.9	HUMAN	Alpha-1-antitrypsin
[1]		P01009	129	1193	4	-0.97	QLAHQSNSTNIFFSPVSIATAF	HexNAc2Hex12+Cation:K@7||HexNAc4Hex5FucNeuAc2+Cation:K@7	glycopepnew_HCDEThcDiTCIDpeptide_EThcDpd2	60.817	2	17797	19	3.2e-07	1	46736.9	HUMAN	Alpha-1-antitrypsin
[1]		P01009	129	1152.49	4	4.8	QLAHQSNSTNIFFSPVSIATAF	HexNAc4Hex4FucNeuAc2+Cation:K@7	glycopepnew_HCDEThcDiTCIDpeptide_EThcDpd2	61.017	2	17857	16	3.9e-06	1	46736.9	HUMAN	Alpha-1-antitrypsin
[1]		P01009	129	1183.51	4	0.73	QLAHQSNSTNIFFSPVSIATAF	HexNAc4Hex5FucNeuAc2@7=45	glycopepnew_HCDEThcDiTCIDpeptide_EThcDpd2	60.817	1	17795	31	7.6e-12	1	46736.9	HUMAN	Alpha-1-antitrypsin
[1]		P01009	129	1156.48	4	-1.2	QLAHQSNSTNIFFSPVSIATAF	HexNAc4Hex5NeuAc2+Cation:K@7=48	glycopepnew_HCDEThcDiTCIDpeptide_EThcDpd2	60.95	2	17837	25	5.6e-10	1	46736.9	HUMAN	Alpha-1-antitrypsin
[1]		P01009	129	1134.73	4	-5	QLAHQSNSTNIFFSPVSIATAF	HexNAc5Hex5Fuc2+Cation:K@7	glycopepnew_HCDEThcDiTCIDpeptide_EThcDpd2	64.983	1	19118	10	8.8e-05	1	46736.9	HUMAN	Alpha-1-antitrypsin
[1]		P01009	129	1193.26	4	1	QLAHQSNSTNIFFSPVSIATAFAM	Gln->pyro-Glu@1=51;HexNAc4Hex5NeuAc2@7=51	glycopepnew_HCDEThcDiTCIDpeptide_EThcDpd2	84.333	2	25124	27.1	3.1e-10	1	46736.9	HUMAN	Alpha-1-antitrypsin
[1]		P01009	129	1243.77	4	-3.9	QLAHQSNSTNIFFSPVSIATAFAM	HexNAc4Hex5Fuc3NeuAc+Cation:K@7	glycopepnew_HCDEThcDiTCIDpeptide_EThcDpd2	66.75	1	19680	10	0.00019	1	46736.9	HUMAN	Alpha-1-antitrypsin
[1]		P01009	129	1207	4	-2.5	QLAHQSNSTNIFFSPVSIATAFAM	HexNAc4Hex5NeuAc2+Cation:K@7=20	glycopepnew_HCDEThcDiTCIDpeptide_EThcDpd2	67.017	2	19766	19	6.9e-06	1	46736.9	HUMAN	Alpha-1-antitrypsin
[1]		P01009	129	1366.33	4	2.2	QLAHQSNSTNIFFSPVSIATAFAM	HexNAc7Hex8Fuc@7;Oxidation@24	glycopepnew_HCDEThcDiTCIDpeptide_EThcDpd2	68.433	2	20213	14.7	4.3e-05	1	46736.9	HUMAN	Alpha-1-antitrypsin
[1]		P01009	129	1094.28	5	1.3	QLAHQSNSTNIFFSPVSIATAFAMLS	HexNAc7Hex6NeuAc@7	glycopepnew_HCDEThcDiTCIDpeptide_EThcDpd2	65.8	1	19381	18.7	2.4e-05	1	46736.9	HUMAN	Alpha-1-antitrypsin
[1]		P01009	129	1357.35	4	-3.1	QLAHQSNSTNIFFSPVSIATAFAMLSLGTK	Gln->pyro-Glu&HexNAc5Hex4NeuAc2&Oxidation@(1&7&24)||HexNAc4Hex5Fuc4+Cation:K@7||HexNAc6Hex6+Cation:K&Oxidation@(7&24)	glycopepnew_HCDEThcDiTCIDpeptide_EThcDpd2	65.333	2	19235	13.6	5.8e-06	1	46736.9	HUMAN	Alpha-1-antitrypsin
[1]		P01009	129	1348.6	4	3.8	QLAHQSNSTNIFFSPVSIATAFAMLSLGTK	Gln->pyro-Glu@1;HexNAc4Hex4FucNeuAc2+Cation:K@7	glycopepnew_HCDEThcDiTCIDpeptide_EThcDpd2	80.35	1	24011	47.4	4.3e-13	1	46736.9	HUMAN	Alpha-1-antitrypsin
[1]		P01009	129	1343.35	4	-2.4	QLAHQSNSTNIFFSPVSIATAFAMLSLGTK	Gln->pyro-Glu@1;HexNAc4Hex5Fuc2NeuAc@7	glycopepnew_HCDEThcDiTCIDpeptide_EThcDpd2	79.917	2	23887	23.1	4.4e-09	1	46736.9	HUMAN	Alpha-1-antitrypsin
[1]		P01009	129	1379.87	4	1.1	QLAHQSNSTNIFFSPVSIATAFAMLSLGTK	Gln->pyro-Glu@1;HexNAc4Hex5Fuc3NeuAc@7||HexNAc9Hex3+Cation:K@7	glycopepnew_HCDEThcDiTCIDpeptide_EThcDpd2	81	1	24214	24.9	1.4e-11	1	46736.9	HUMAN	Alpha-1-antitrypsin
[1]		P01009	129	1270.33	4	2.2	QLAHQSNSTNIFFSPVSIATAFAMLSLGTK	Gln->pyro-Glu@1;HexNAc4Hex5NeuAc@7=54	glycopepnew_HCDEThcDiTCIDpeptide_EThcDpd2	70.767	1	20973	38.2	7.5e-11	1	46736.9	HUMAN	Alpha-1-antitrypsin
[1]		P01009	129	1279.81	4	-0.77	QLAHQSNSTNIFFSPVSIATAFAMLSLGTK	Gln->pyro-Glu@1;HexNAc4Hex5NeuAc+Cation:K@7=129	glycopepnew_HCDEThcDiTCIDpeptide_EThcDpd2	70.833	1	20990	61.4	7.3e-20	1	46736.9	HUMAN	Alpha-1-antitrypsin
[1]		P01009	129	1082.27	5	-1.1	QLAHQSNSTNIFFSPVSIATAFAMLSLGTK	Gln->pyro-Glu@1;HexNAc4Hex5NeuAc2+Cation:K@7=109	glycopepnew_HCDEThcDiTCIDpeptide_EThcDpd2	80.417	1	24029	71.4	5.8e-23	1	46736.9	HUMAN	Alpha-1-antitrypsin
[1]		P01009	129	1367.34	4	-7.7	QLAHQSNSTNIFFSPVSIATAFAMLSLGTK	Gln->pyro-Glu@1;HexNAc5Hex5Fuc3+Cation:K@7	glycopepnew_HCDEThcDiTCIDpeptide_EThcDpd2	64.8	1	19067	14.9	2.6e-06	1	46736.9	HUMAN	Alpha-1-antitrypsin
[1]		P01009	129	1380.12	4	-3	QLAHQSNSTNIFFSPVSIATAFAMLSLGTK	Gln->pyro-Glu@1;HexNAc6Hex7@7=10	glycopepnew_HCDEThcDiTCIDpeptide_EThcDpd2	81.167	1	24261	13.5	2.5e-06	1	46736.9	HUMAN	Alpha-1-antitrypsin
[1]		P01009	129	1394.38	4	1.4	QLAHQSNSTNIFFSPVSIATAFAMLSLGTK	Gln->pyro-Glu@1;HexNAc7Hex6@7;Oxidation@24	glycopepnew_HCDEThcDiTCIDpeptide_EThcDpd2	64.617	1	19007	21.7	2.1e-06	1	46736.9	HUMAN	Alpha-1-antitrypsin
[1]		P01009	129	1383.86	4	-0.68	QLAHQSNSTNIFFSPVSIATAFAMLSLGTK	Gln->pyro-Glu@1;Oxidation@24=36;HexNAc4Hex5Fuc3NeuAc@7||HexNAc9Hex3+Cation:K@7	glycopepnew_HCDEThcDiTCIDpeptide_EThcDpd2	76.017	2	22663	24.2	7.1e-09	1	46736.9	HUMAN	Alpha-1-antitrypsin
[1]		P01009	129	1347.61	4	-3.1	QLAHQSNSTNIFFSPVSIATAFAMLSLGTK	Gln->pyro-Glu@1=25;HexNAc4Hex5Fuc4&Oxidation@(7&24)||HexNAc4Hex6Fuc3@7	glycopepnew_HCDEThcDiTCIDpeptide_EThcDpd2	77.35	1	23084	11.5	4.7e-05	1	46736.9	HUMAN	Alpha-1-antitrypsin
[1]		P01009	129	1343.1	4	-2.3	QLAHQSNSTNIFFSPVSIATAFAMLSLGTK	Gln->pyro-Glu@1=30;HexNAc4Hex5NeuAc2@7=30	glycopepnew_HCDEThcDiTCIDpeptide_EThcDpd2	81.05	1	24226	30.8	2.7e-10	1	46736.9	HUMAN	Alpha-1-antitrypsin
[1]		P01009	129	1347.35	4	-2.1	QLAHQSNSTNIFFSPVSIATAFAMLSLGTK	Gln->pyro-Glu@1=34;HexNAc4Hex5Fuc2NeuAc&Oxidation@(7&24)||HexNAc4Hex6FucNeuAc@7	glycopepnew_HCDEThcDiTCIDpeptide_EThcDpd2	77.2	1	23034	15.9	3.1e-06	1	46736.9	HUMAN	Alpha-1-antitrypsin
[1]		P01009	129	1347.35	4	-3	QLAHQSNSTNIFFSPVSIATAFAMLSLGTK	Gln->pyro-Glu@1=36;HexNAc4Hex5Fuc2NeuAc@7=14;Oxidation@24=14	glycopepnew_HCDEThcDiTCIDpeptide_EThcDpd2	76.067	1	22677	26.6	2.7e-08	1	46736.9	HUMAN	Alpha-1-antitrypsin
[1]		P01009	129	1316.58	4	-3	QLAHQSNSTNIFFSPVSIATAFAMLSLGTK	Gln->pyro-Glu@1=36;HexNAc4Hex5Fuc3+Cation:K@7=36	glycopepnew_HCDEThcDiTCIDpeptide_EThcDpd2	70.783	2	20977	15.6	8.3e-07	1	46736.9	HUMAN	Alpha-1-antitrypsin
[1]		P01009	129	1379.62	4	1.9	QLAHQSNSTNIFFSPVSIATAFAMLSLGTK	Gln->pyro-Glu@1=41;HexNAc4Hex5FucNeuAc2@7=41	glycopepnew_HCDEThcDiTCIDpeptide_EThcDpd2	80.883	1	24176	30.7	3.3e-11	1	46736.9	HUMAN	Alpha-1-antitrypsin
[1]		P01009	129	1352.84	4	-4.3	QLAHQSNSTNIFFSPVSIATAFAMLSLGTK	Gln->pyro-Glu@1=51;HexNAc4Hex5Fuc2NeuAc+Cation:K@7=51	glycopepnew_HCDEThcDiTCIDpeptide_EThcDpd2	79.933	1	23892	26.4	1.5e-12	1	46736.9	HUMAN	Alpha-1-antitrypsin
[1]		P01009	129	1114.89	5	-0.72	QLAHQSNSTNIFFSPVSIATAFAMLSLGTK	HexNAc2Hex12+Cation:K@7||HexNAc4Hex5FucNeuAc2+Cation:K@7	glycopepnew_HCDEThcDiTCIDpeptide_EThcDpd2	68.2	1	20136	79.4	2.3e-26	1	46736.9	HUMAN	Alpha-1-antitrypsin
[1]		P01009	129	1352.86	4	5.8	QLAHQSNSTNIFFSPVSIATAFAMLSLGTK	HexNAc4Hex4FucNeuAc2+Cation:K@7=43	glycopepnew_HCDEThcDiTCIDpeptide_EThcDpd2	68.583	1	20258	38	1.6e-13	1	46736.9	HUMAN	Alpha-1-antitrypsin
[1]		P01009	129	1274.84	4	-2.7	QLAHQSNSTNIFFSPVSIATAFAMLSLGTK	HexNAc4Hex5Fuc2@7	glycopepnew_HCDEThcDiTCIDpeptide_EThcDpd2	62.167	1	18241	13.4	4.7e-06	1	46736.9	HUMAN	Alpha-1-antitrypsin
[1]		P01009	129	1284.32	4	-4.3	QLAHQSNSTNIFFSPVSIATAFAMLSLGTK	HexNAc4Hex5Fuc2+Cation:K@7	glycopepnew_HCDEThcDiTCIDpeptide_EThcDpd2	61.833	1	18125	32.1	3.5e-10	1	46736.9	HUMAN	Alpha-1-antitrypsin
[1]		P01009	129	1351.61	4	-3.2	QLAHQSNSTNIFFSPVSIATAFAMLSLGTK	HexNAc4Hex5Fuc2NeuAc@7=14;Oxidation@24=14	glycopepnew_HCDEThcDiTCIDpeptide_EThcDpd2	65.333	1	19233	30	1.5e-08	1	46736.9	HUMAN	Alpha-1-antitrypsin
[1]		P01009	129	1078.29	5	-2.5	QLAHQSNSTNIFFSPVSIATAFAMLSLGTK	HexNAc4Hex5Fuc2NeuAc@7=28	glycopepnew_HCDEThcDiTCIDpeptide_EThcDpd2	68.633	1	20275	15.8	8.9e-05	1	46736.9	HUMAN	Alpha-1-antitrypsin
[1]		P01009	129	1085.88	5	-5.3	QLAHQSNSTNIFFSPVSIATAFAMLSLGTK	HexNAc4Hex5Fuc2NeuAc+Cation:K@7=51	glycopepnew_HCDEThcDiTCIDpeptide_EThcDpd2	68.183	2	20131	30	2.8e-10	1	46736.9	HUMAN	Alpha-1-antitrypsin
[1]		P01009	129	1311.35	4	-4.7	QLAHQSNSTNIFFSPVSIATAFAMLSLGTK	HexNAc4Hex5Fuc3@7	glycopepnew_HCDEThcDiTCIDpeptide_EThcDpd2	61.733	2	18098	18	1.2e-06	1	46736.9	HUMAN	Alpha-1-antitrypsin
[1]		P01009	129	1086.08	5	-6.5	QLAHQSNSTNIFFSPVSIATAFAMLSLGTK	HexNAc4Hex5Fuc4+Cation:K@7=42	glycopepnew_HCDEThcDiTCIDpeptide_EThcDpd2	69.15	1	20443	39	2.2e-14	1	46736.9	HUMAN	Alpha-1-antitrypsin
[1]		P01009	129	1383.87	4	1.1	QLAHQSNSTNIFFSPVSIATAFAMLSLGTK	HexNAc4Hex5FucNeuAc2@7=50	glycopepnew_HCDEThcDiTCIDpeptide_EThcDpd2	68.783	2	20325	40.1	7.9e-14	1	46736.9	HUMAN	Alpha-1-antitrypsin
[1]		P01009	129	1274.59	4	1.2	QLAHQSNSTNIFFSPVSIATAFAMLSLGTK	HexNAc4Hex5NeuAc@7=45	glycopepnew_HCDEThcDiTCIDpeptide_EThcDpd2	61.817	2	18123	60.5	4.1e-18	1	46736.9	HUMAN	Alpha-1-antitrypsin
[1]		P01009	129	1027.46	5	-0.77	QLAHQSNSTNIFFSPVSIATAFAMLSLGTK	HexNAc4Hex5NeuAc+Cation:K@7=72	glycopepnew_HCDEThcDiTCIDpeptide_EThcDpd2	61.6	2	18059	72.8	1.9e-22	1	46736.9	HUMAN	Alpha-1-antitrypsin
[1]		P01009	129	1347.36	4	-0.39	QLAHQSNSTNIFFSPVSIATAFAMLSLGTK	HexNAc4Hex5NeuAc2@7=51	glycopepnew_HCDEThcDiTCIDpeptide_EThcDpd2	69.267	1	20482	48.5	2e-16	1	46736.9	HUMAN	Alpha-1-antitrypsin
[1]		P01009	129	1085.68	5	-1	QLAHQSNSTNIFFSPVSIATAFAMLSLGTK	HexNAc4Hex5NeuAc2+Cation:K@7=66	glycopepnew_HCDEThcDiTCIDpeptide_EThcDpd2	68.417	2	20206	76.6	1.2e-24	1	46736.9	HUMAN	Alpha-1-antitrypsin
[1]		P01009	129	1371.35	4	-3.5	QLAHQSNSTNIFFSPVSIATAFAMLSLGTK	HexNAc5Hex4Fuc2NeuAc+Cation:K&Oxidation@(7&24)||HexNAc5Hex5FucNeuAc+Cation:K@7	glycopepnew_HCDEThcDiTCIDpeptide_EThcDpd2	56.567	1	16439	13.6	4.3e-07	1	46736.9	HUMAN	Alpha-1-antitrypsin
[1]		P01009	129	1398.13	4	1.9	QLAHQSNSTNIFFSPVSIATAFAMLSLGTK	HexNAc5Hex4FucNeuAc2&Oxidation@(7&24)||HexNAc5Hex5NeuAc2@7	glycopepnew_HCDEThcDiTCIDpeptide_EThcDpd2	56.317	1	16360	24.8	5.6e-08	1	46736.9	HUMAN	Alpha-1-antitrypsin
[1]		P01009	129	1361.62	4	2.2	QLAHQSNSTNIFFSPVSIATAFAMLSLGTK	HexNAc5Hex4NeuAc2@7=56;Oxidation@24=56	glycopepnew_HCDEThcDiTCIDpeptide_EThcDpd2	56.7	1	16482	28.3	3.1e-08	1	46736.9	HUMAN	Alpha-1-antitrypsin
[1]		P01009	129	1097.08	5	-1.4	QLAHQSNSTNIFFSPVSIATAFAMLSLGTK	HexNAc5Hex4NeuAc2+Cation:K@7=79;Oxidation@24=79	glycopepnew_HCDEThcDiTCIDpeptide_EThcDpd2	56.5	2	16420	38.6	8.7e-13	1	46736.9	HUMAN	Alpha-1-antitrypsin
[1]		P01009	129	1238.54	5	-0.78	QLAHQSNSTNIFFSPVSIATAFAMLSLGTK	HexNAc5Hex6FucNeuAc3@7	glycopepnew_HCDEThcDiTCIDpeptide_EThcDpd2	76.35	2	22771	36.4	1.1e-09	1	46736.9	HUMAN	Alpha-1-antitrypsin
[1]		P01009	129	1385.87	4	0.67	QLAHQSNSTNIFFSPVSIATAFAMLSLGTK	HexNAc6Hex5Fuc2+Cation:K@7	glycopepnew_HCDEThcDiTCIDpeptide_EThcDpd2	80.083	2	23941	21.5	3.8e-07	1	46736.9	HUMAN	Alpha-1-antitrypsin
[1]		P01009	129	1082.88	5	1.8	QLAHQSNSTNIFFSPVSIATAFAMLSLGTK	HexNAc6Hex6+Cation:K@7=18	glycopepnew_HCDEThcDiTCIDpeptide_EThcDpd2	68.417	1	20204	14.6	0.0001	1	46736.9	HUMAN	Alpha-1-antitrypsin
[1]		P01009	129	1384.37	4	-3.6	QLAHQSNSTNIFFSPVSIATAFAMLSLGTK	HexNAc6Hex7@7=19	glycopepnew_HCDEThcDiTCIDpeptide_EThcDpd2	68.5	1	20230	38.5	1.4e-10	1	46736.9	HUMAN	Alpha-1-antitrypsin
[1]		P01009	129	1238.95	5	2.1	QLAHQSNSTNIFFSPVSIATAFAMLSLGTK	HexNAc7Hex8NeuAc@7	glycopepnew_HCDEThcDiTCIDpeptide_EThcDpd2	76.3	1	22750	18.8	2.1e-06	1	46736.9	HUMAN	Alpha-1-antitrypsin
[1]		P01009	129	1114.69	5	-4.5	QLAHQSNSTNIFFSPVSIATAFAMLSLGTKA	HexNAc5Hex6NeuAc+Cation:K@7=17	glycopepnew_HCDEThcDiTCIDpeptide_EThcDpd2	68.367	1	20187	15.1	0.00015	1	46736.9	HUMAN	Alpha-1-antitrypsin
[5]		P01023	66	1346.35	4	0.67	QNMVLFAPNIYVLDYLNETQQLTPEIK	Gln->pyro-Glu@1;HexNAc4Hex5NeuAc2@17	glycopepnew_HCDEThcDiTCIDpeptide_EThcDpd2	84.45	1	25155	32.7	9.9e-10	1	163292	HUMAN	Alpha-2-macroglobulin
[6-1]	24	P19652	58	1205.71	4	-1.9	QNQCFYNSSYLNVQR	HexNAc5Hex6NeuAc3+Cation:K@7=57	glycopepnew_HCDEThcDiTCIDpeptide_EThcDpd2	44.367	2	12479	27.9	4.7e-11	1	23602.8	HUMAN	Alpha-1-acid glycoprotein 2
[6-1]	24	P19652	58	1297.25	4	-1.2	QNQCFYNSSYLNVQR	HexNAc6Hex7Fuc2NeuAc2+Cation:K@7	glycopepnew_HCDEThcDiTCIDpeptide_EThcDpd2	44.317	2	12466	29.8	5.5e-08	1	23602.8	HUMAN	Alpha-1-acid glycoprotein 2
[6-1]	24	P19652	58	1370.02	4	-4.4	QNQCFYNSSYLNVQR	HexNAc6Hex7Fuc2NeuAc3+Cation:K@7	glycopepnew_HCDEThcDiTCIDpeptide_EThcDpd2	57.183	2	16637	25.4	7.3e-11	1	23602.8	HUMAN	Alpha-1-acid glycoprotein 2
[6-1]	24	P19652	58	1220.72	4	-0.62	QNQCFYNSSYLNVQR	HexNAc8Hex8+Cation:K@7=55	glycopepnew_HCDEThcDiTCIDpeptide_EThcDpd2	36.95	2	9948	21	1.5e-07	1	23602.8	HUMAN	Alpha-1-acid glycoprotein 2
[6-1]	24	P19652	58	1297.75	4	-6	QNQCFYNSSYLNVQR	HexNAc8Hex9Fuc+Cation:K@7	glycopepnew_HCDEThcDiTCIDpeptide_EThcDpd2	43.7	1	12252	23.4	5.1e-08	1	23602.8	HUMAN	Alpha-1-acid glycoprotein 2
[4]		P02787	67	1196.71	4	2.5	QQQHLFGSNVTD	HexNAc6Hex7FucNeuAc3+Cation:K@9	glycopepnew_HCDEThcDiTCIDpeptide_EThcDpd2	42.9	1	11987	13	0.00018	1	77064.7	HUMAN	Serotransferrin
[4]		P02787	67	1088.82	5	6.9	QQQHLFGSNVTD	HexNAc7Hex8FucNeuAc4+Cation:K@9	glycopepnew_HCDEThcDiTCIDpeptide_EThcDpd2	47.65	1	13563	13	0.00014	1	77064.7	HUMAN	Serotransferrin
[4]		P02787	67	1046.4	4	1.3	QQQHLFGSNVTDC	HexNAc6Hex5NeuAc2+Cation:K@9	glycopepnew_HCDEThcDiTCIDpeptide_EThcDpd2	38.367	2	10427	13	1.4e-05	1	77064.7	HUMAN	Serotransferrin
[4]		P02787	67	1127.18	4	3.4	QQQHLFGSNVTDCSG	HexNAc6Hex7FucNeuAc+Cation:K@9	glycopepnew_HCDEThcDiTCIDpeptide_EThcDpd2	37.683	1	10197	16	1.8e-06	1	77064.7	HUMAN	Serotransferrin
[4]		P02787	67	986.581	5	6	QQQHLFGSNVTDCSGNF	HexNAc6Hex8FucNeuAc+Cation:K@9=56	glycopepnew_HCDEThcDiTCIDpeptide_EThcDpd2	42	2	11673	18.1	6.1e-08	1	77064.7	HUMAN	Serotransferrin
[4]		P02787	67	965.158	5	-6.7	QQQHLFGSNVTDCSGNFC	HexNAc7Hex6NeuAc+Cation:K@9=42	glycopepnew_HCDEThcDiTCIDpeptide_EThcDpd2	42.467	1	11842	16	1.8e-06	1	77064.7	HUMAN	Serotransferrin
[4]		P02787	67	1151.96	4	3.5	QQQHLFGSNVTDCSGNFCLF	HexNAc5Hex4NeuAc2@9	glycopepnew_HCDEThcDiTCIDpeptide_EThcDpd2	40.017	2	10989	13.6	1.8e-06	1	77064.7	HUMAN	Serotransferrin
[4]		P02787	67	1181.97	4	5.6	QQQHLFGSNVTDCSGNFCLFR	Gln->pyro-Glu@1;HexNAc4Hex4FucNeuAc2+Cation:K@9	glycopepnew_HCDEThcDiTCIDpeptide_EThcDpd2	50.817	1	14580	37	8.3e-12	1	77064.7	HUMAN	Serotransferrin
[4]		P02787	67	1176.72	4	-4.7	QQQHLFGSNVTDCSGNFCLFR	Gln->pyro-Glu@1;HexNAc4Hex5Fuc2NeuAc@9	glycopepnew_HCDEThcDiTCIDpeptide_EThcDpd2	51.65	3	14866	36.9	2e-11	1	77064.7	HUMAN	Serotransferrin
[4]		P02787	67	1176.98	4	-6.4	QQQHLFGSNVTDCSGNFCLFR	Gln->pyro-Glu@1;HexNAc4Hex5Fuc4@9	glycopepnew_HCDEThcDiTCIDpeptide_EThcDpd2	52.717	2	15206	24.4	3.8e-07	1	77064.7	HUMAN	Serotransferrin
[4]		P02787	67	1103.7	4	0.43	QQQHLFGSNVTDCSGNFCLFR	Gln->pyro-Glu@1;HexNAc4Hex5NeuAc@9	glycopepnew_HCDEThcDiTCIDpeptide_EThcDpd2	44.567	1	12540	21.4	1.1e-06	1	77064.7	HUMAN	Serotransferrin
[4]		P02787	67	1113.19	4	-1.8	QQQHLFGSNVTDCSGNFCLFR	Gln->pyro-Glu@1;HexNAc4Hex5NeuAc+Cation:K@9	glycopepnew_HCDEThcDiTCIDpeptide_EThcDpd2	44.483	2	12511	49.6	9.4e-16	1	77064.7	HUMAN	Serotransferrin
[4]		P02787	67	1185.96	4	-1.4	QQQHLFGSNVTDCSGNFCLFR	Gln->pyro-Glu@1;HexNAc4Hex5NeuAc2+Cation:K@9	glycopepnew_HCDEThcDiTCIDpeptide_EThcDpd2	51.133	1	14694	37.5	6.6e-12	1	77064.7	HUMAN	Serotransferrin
[4]		P02787	67	1386.53	4	-0.88	QQQHLFGSNVTDCSGNFCLFR	Gln->pyro-Glu@1;HexNAc5Hex6FucNeuAc3+Cation:K@9	glycopepnew_HCDEThcDiTCIDpeptide_EThcDpd2	59	2	17213	29.6	2.2e-10	1	77064.7	HUMAN	Serotransferrin
[4]		P02787	67	1350.02	4	0.33	QQQHLFGSNVTDCSGNFCLFR	Gln->pyro-Glu@1;HexNAc5Hex6NeuAc3+Cation:K@9	glycopepnew_HCDEThcDiTCIDpeptide_EThcDpd2	58.6	2	17083	19.1	9.4e-07	1	77064.7	HUMAN	Serotransferrin
[4]		P02787	67	1176.48	4	2.4	QQQHLFGSNVTDCSGNFCLFR	Gln->pyro-Glu@1=68;HexNAc4Hex5NeuAc2@9=68	glycopepnew_HCDEThcDiTCIDpeptide_EThcDpd2	50.733	3	14563	45.2	6e-13	1	77064.7	HUMAN	Serotransferrin
[4]		P02787	67	1340.53	4	0.94	QQQHLFGSNVTDCSGNFCLFR	Gln->pyro-Glu@1=79;HexNAc5Hex6NeuAc3@9||HexNAc6Hex9Fuc+Cation:K@9	glycopepnew_HCDEThcDiTCIDpeptide_EThcDpd2	58.683	2	17111	28.4	5.8e-10	1	77064.7	HUMAN	Serotransferrin
[4]		P02787	67	981.588	5	-0.0049	QQQHLFGSNVTDCSGNFCLFR	HexNAc2Hex12+Cation:K@9||HexNAc4Hex5FucNeuAc2+Cation:K@9	glycopepnew_HCDEThcDiTCIDpeptide_EThcDpd2	42	1	11671	50	1.5e-14	1	77064.7	HUMAN	Serotransferrin
[4]		P02787	67	1186.22	4	2.7	QQQHLFGSNVTDCSGNFCLFR	HexNAc4Hex4FucNeuAc2+Cation:K@9=104	glycopepnew_HCDEThcDiTCIDpeptide_EThcDpd2	42.55	2	11865	47.5	4.8e-18	1	77064.7	HUMAN	Serotransferrin
[4]		P02787	67	1108.21	4	-1.7	QQQHLFGSNVTDCSGNFCLFR	HexNAc4Hex5Fuc2@9	glycopepnew_HCDEThcDiTCIDpeptide_EThcDpd2	38.467	1	10466	30.4	7.4e-09	1	77064.7	HUMAN	Serotransferrin
[4]		P02787	67	894.357	5	-5	QQQHLFGSNVTDCSGNFCLFR	HexNAc4Hex5Fuc2+Cation:K@9	glycopepnew_HCDEThcDiTCIDpeptide_EThcDpd2	37.833	1	10256	25.4	5.2e-08	1	77064.7	HUMAN	Serotransferrin
[4]		P02787	67	1180.98	4	-2.2	QQQHLFGSNVTDCSGNFCLFR	HexNAc4Hex5Fuc2NeuAc@9=50	glycopepnew_HCDEThcDiTCIDpeptide_EThcDpd2	36.4	1	9754	31	1.1e-10	1	77064.7	HUMAN	Serotransferrin
[4]		P02787	67	1217.49	4	-0.61	QQQHLFGSNVTDCSGNFCLFR	HexNAc4Hex5Fuc3NeuAc@9||HexNAc9Hex3+Cation:K@9	glycopepnew_HCDEThcDiTCIDpeptide_EThcDpd2	42.35	2	11797	28	2.3e-07	1	77064.7	HUMAN	Serotransferrin
[4]		P02787	67	1217.24	4	0.55	QQQHLFGSNVTDCSGNFCLFR	HexNAc4Hex5FucNeuAc2@9=48	glycopepnew_HCDEThcDiTCIDpeptide_EThcDpd2	42.133	1	11720	39.9	1.1e-12	1	77064.7	HUMAN	Serotransferrin
[4]		P02787	67	1107.96	4	1.2	QQQHLFGSNVTDCSGNFCLFR	HexNAc4Hex5NeuAc@9=62	glycopepnew_HCDEThcDiTCIDpeptide_EThcDpd2	37.783	1	10231	49	4.4e-14	1	77064.7	HUMAN	Serotransferrin
[4]		P02787	67	894.157	5	-0.68	QQQHLFGSNVTDCSGNFCLFR	HexNAc4Hex5NeuAc+Cation:K@9=121	glycopepnew_HCDEThcDiTCIDpeptide_EThcDpd2	37.617	1	10170	61.8	1.6e-24	1	77064.7	HUMAN	Serotransferrin
[4]		P02787	67	1180.73	4	0.74	QQQHLFGSNVTDCSGNFCLFR	HexNAc4Hex5NeuAc2@9=71	glycopepnew_HCDEThcDiTCIDpeptide_EThcDpd2	42.383	1	11811	46	2.3e-14	1	77064.7	HUMAN	Serotransferrin
[4]		P02787	67	952.376	5	-0.74	QQQHLFGSNVTDCSGNFCLFR	HexNAc4Hex5NeuAc2+Cation:K@9=89	glycopepnew_HCDEThcDiTCIDpeptide_EThcDpd2	42.733	1	11920	66	1.9e-22	1	77064.7	HUMAN	Serotransferrin
[4]		P02787	67	1195.49	4	-6.4	QQQHLFGSNVTDCSGNFCLFR	HexNAc5Hex5Fuc3@9	glycopepnew_HCDEThcDiTCIDpeptide_EThcDpd2	42.1	2	11706	18.5	5.9e-06	1	77064.7	HUMAN	Serotransferrin
[4]		P02787	67	1195.25	4	5.6	QQQHLFGSNVTDCSGNFCLFR	HexNAc5Hex5FucNeuAc@9=53	glycopepnew_HCDEThcDiTCIDpeptide_EThcDpd2	42.35	1	11795	25.8	5.9e-09	1	77064.7	HUMAN	Serotransferrin
[4]		P02787	67	1199.49	4	-3.5	QQQHLFGSNVTDCSGNFCLFR	HexNAc5Hex6Fuc2@9	glycopepnew_HCDEThcDiTCIDpeptide_EThcDpd2	37.35	2	10077	28.7	2.6e-08	1	77064.7	HUMAN	Serotransferrin
[4]		P02787	67	967.385	5	-3.1	QQQHLFGSNVTDCSGNFCLFR	HexNAc5Hex6Fuc2+Cation:K@9	glycopepnew_HCDEThcDiTCIDpeptide_EThcDpd2	37.267	1	10048	21.4	9.9e-08	1	77064.7	HUMAN	Serotransferrin
[4]		P02787	67	1381.3	4	-1.2	QQQHLFGSNVTDCSGNFCLFR	HexNAc5Hex6FucNeuAc3@9	glycopepnew_HCDEThcDiTCIDpeptide_EThcDpd2	47.633	1	13557	22.8	1.1e-05	1	77064.7	HUMAN	Serotransferrin
[4]		P02787	67	1025.4	5	-2.2	QQQHLFGSNVTDCSGNFCLFR	HexNAc5Hex6NeuAc2+Cation:K@9=98	glycopepnew_HCDEThcDiTCIDpeptide_EThcDpd2	42.017	1	11675	42	3.5e-18	1	77064.7	HUMAN	Serotransferrin
[4]		P02787	67	1217.75	4	-2.3	QQQHLFGSNVTDCSGNFCLFR	HexNAc6Hex7@9	glycopepnew_HCDEThcDiTCIDpeptide_EThcDpd2	42.967	1	12005	14.4	3.9e-05	1	77064.7	HUMAN	Serotransferrin
[4]		P02787	67	1355.02	4	-7.9	QQQHLFGSNVTDCSGNFCLFR	HexNAc7Hex8Fuc+Cation:K@9	glycopepnew_HCDEThcDiTCIDpeptide_EThcDpd2	47.617	1	13555	33.6	2.1e-11	1	77064.7	HUMAN	Serotransferrin
[4]		P02787	67	1336.28	4	-3.6	QQQHLFGSNVTDCSGNFCLFRS	Gln->pyro-Glu@1;HexNAc6Hex5FucNeuAc2@9	glycopepnew_HCDEThcDiTCIDpeptide_EThcDpd2	50.633	1	14528	13.6	0.0002	1	77064.7	HUMAN	Serotransferrin
[1]		P01009	129	1235.3	4	-0.62	QSNSTNIFFSPVSIATAFAMLSLGTK	Gln->pyro-Glu&HexNAc4Hex6Fuc3@(1&3)||HexNAc4Hex5Fuc2NeuAc@3	glycopepnew_HCDEThcDiTCIDpeptide_EThcDpd2	79.617	1	23795	20.3	3.3e-05	1	46736.9	HUMAN	Alpha-1-antitrypsin
[1]		P01009	129	1235.05	4	1.3	QSNSTNIFFSPVSIATAFAMLSLGTK	Gln->pyro-Glu&HexNAc4Hex6FucNeuAc@(1&3)||HexNAc4Hex5NeuAc2@3	glycopepnew_HCDEThcDiTCIDpeptide_EThcDpd2	79.683	1	23814	31.8	5.6e-08	1	46736.9	HUMAN	Alpha-1-antitrypsin
[1]		P01009	129	1240.54	4	3.7	QSNSTNIFFSPVSIATAFAMLSLGTK	HexNAc4Hex4FucNeuAc2+Cation:K@3=13	glycopepnew_HCDEThcDiTCIDpeptide_EThcDpd2	79.85	1	23865	36.6	8.8e-09	1	46736.9	HUMAN	Alpha-1-antitrypsin
[1]		P01009	129	1281.3	4	-4.5	QSNSTNIFFSPVSIATAFAMLSLGTK	HexNAc4Hex5Fuc3NeuAc+Cation:K@3=50	glycopepnew_HCDEThcDiTCIDpeptide_EThcDpd2	79.45	1	23744	23.9	1.6e-07	1	46736.9	HUMAN	Alpha-1-antitrypsin
[1]		P01009	129	908.719	6	-4.6	QSNSTNIFFSPVSIATAFAMLSLGTK	HexNAc6Hex9+Cation:K@3	glycopepnew_HCDEThcDiTCIDpeptide_EThcDpd2	80.317	1	24007	21	1.3e-10	1	46736.9	HUMAN	Alpha-1-antitrypsin
[1]		P01009	129	1348.85	4	7.8	QSNSTNIFFSPVSIATAFAMLSLGTK	HexNAc9Hex4Fuc+Cation:K@3	glycopepnew_HCDEThcDiTCIDpeptide_EThcDpd2	80.583	1	24084	12.9	8.3e-06	1	46736.9	HUMAN	Alpha-1-antitrypsin
[16]		P04217	10	1182.5	5	1.8	REGDHEFLEVPEAQEDVEATFPVHQPGNYS	HexNAc6Hex6NeuAc@28	glycopepnew_HCDEThcDiTCIDpeptide_EThcDpd2	35.583	1	9481	38.2	3.8e-13	1	54254	HUMAN	Alpha-1B-glycoprotein
[16]		P04217	10	1040.42	6	2.2	REGDHEFLEVPEAQEDVEATFPVHQPGNYS	HexNAc6Hex6NeuAc2+Cation:K@28	glycopepnew_HCDEThcDiTCIDpeptide_EThcDpd2	38.45	1	10460	32	2.1e-11	1	54254	HUMAN	Alpha-1B-glycoprotein
[16]		P04217	10	1044.75	6	-7.4	REGDHEFLEVPEAQEDVEATFPVHQPGNYSC	HexNAc6Hex9@28	glycopepnew_HCDEThcDiTCIDpeptide_EThcDpd2	38.4	1	10441	28.6	1.2e-07	1	54254	HUMAN	Alpha-1B-glycoprotein
[16]		P04217	10	1033.93	6	-2.6	REGDHEFLEVPEAQEDVEATFPVHQPGNYSCSYR	HexNAc4Hex5Fuc2NeuAc@28	glycopepnew_HCDEThcDiTCIDpeptide_EThcDpd2	38.367	1	10422	40.6	2.3e-14	1	54254	HUMAN	Alpha-1B-glycoprotein
[16]		P04217	10	1372.16	5	-2.9	REGDHEFLEVPEAQEDVEATFPVHQPGNYSCSYR	HexNAc7Hex8Fuc@28	glycopepnew_HCDEThcDiTCIDpeptide_EThcDpd2	41.15	1	11379	26.5	3.9e-08	1	54254	HUMAN	Alpha-1B-glycoprotein
[1]		P01009	129	1117.3	5	-4	RQLAHQSNSTNIFFSPVSIATAFAMLSLGTK	HexNAc6Hex6+Cation:K@8;Oxidation@25	glycopepnew_HCDEThcDiTCIDpeptide_EThcDpd2	60.717	1	17766	15.4	4.3e-06	1	46736.9	HUMAN	Alpha-1-antitrypsin
[2]		P01876	118	933.58	5	-4.8	SEANLTCTLTGLR	HexNAc6Hex7Fuc4NeuAc@4	glycopepnew_HCDEThcDiTCIDpeptide_EThcDpd2	66.2	1	19511	14.8	1.2e-06	2	37655	HUMAN	Immunoglobulin heavy constant alpha 1
[3]		P00738	93	1313.39	5	7.1	SFPWQAKMVSHHNLTTGATLINEQWLLTTAK	Oxidation@4=27;Oxidation@8=27;HexNAc5Hex6FucNeuAc3@13	glycopepnew_HCDEThcDiTCIDpeptide_EThcDpd2	39.917	1	10951	14.8	3.1e-05	1	45205.7	HUMAN	Haptoglobin
[11]		P08185	21	1159.22	4	-6.2	SGLWTVQAMDPNAAYVNMSNHHR	Oxidation@4=24;HexNAc3Hex6FucNeuAc@17=24	glycopepnew_HCDEThcDiTCIDpeptide_EThcDpd2	80	1	23911	13.7	1.2e-05	1	45141.3	HUMAN	Corticosteroid-binding globulin
[46]		P04278	1	1128.19	4	0.055	SHEIWTHSCPQSPGNGTDASH	HexNAc4Hex5NeuAc2@15	glycopepnew_HCDEThcDiTCIDpeptide_EThcDpd2	20.45	1	4478	35.6	8e-15	1	43779.6	HUMAN	Sex hormone-binding globulin
[3]		P00738	93	1193.28	4	-7.5	SHHNLTTGATLINEQWLLTTAK	HexNAc6Hex5Fuc2@4	glycopepnew_HCDEThcDiTCIDpeptide_EThcDpd2	37.933	1	10281	33.5	5.5e-09	1	45205.7	HUMAN	Haptoglobin
[5]		P01023	66	887.12	4	-0.76	SINTTNVMGTSLTVR	HexNAc4Hex5NeuAc+Cation:K@3=45	glycopepnew_HCDEThcDiTCIDpeptide_EThcDpd2	33.983	1	8949	50	9.7e-15	1	163292	HUMAN	Alpha-2-macroglobulin
[5]		P01023	66	901.374	4	-1.4	SINTTNVMGTSLTVR	HexNAc5Hex4NeuAc+Cation:K@3;Oxidation@8	glycopepnew_HCDEThcDiTCIDpeptide_EThcDpd2	21.183	2	4733	13.2	6.9e-05	1	163292	HUMAN	Alpha-2-macroglobulin
[30]		P05156	4	1240.77	4	-4.5	SIPACVPWSPYLFQPNDTCIVSGWGR	HexNAc4Hex5Fuc2+Cation:K@16	glycopepnew_HCDEThcDiTCIDpeptide_EThcDpd2	54.75	1	15863	26.7	1.7e-08	1	65751	HUMAN	Complement factor I
[30]		P05156	4	1303.8	4	0.013	SIPACVPWSPYLFQPNDTCIVSGWGR	HexNAc4Hex5NeuAc2@16	glycopepnew_HCDEThcDiTCIDpeptide_EThcDpd2	61.4	2	17990	43.5	8.9e-12	1	65751	HUMAN	Complement factor I
[32]		P01042	4	820.563	4	-2.4	SIVQTNCSK	HexNAc4Hex5NeuAc2+Cation:K@6	glycopepnew_HCDEThcDiTCIDpeptide_EThcDpd2	19.567	1	4162	12.3	2.7e-05	1	71958	HUMAN	Kininogen-1
[5]		P01023	66	1117.76	4	0.3	SLGNVNFTVSAEALESQELCGTEVPSVPEHGR	HexNAc2Hex4@6	glycopepnew_HCDEThcDiTCIDpeptide_EThcDpd2	40.7	1	11230	16.6	1.9e-05	1	163292	HUMAN	Alpha-2-macroglobulin
[5]		P01023	66	1158.27	4	0.91	SLGNVNFTVSAEALESQELCGTEVPSVPEHGR	HexNAc2Hex5@6	glycopepnew_HCDEThcDiTCIDpeptide_EThcDpd2	39.15	3	10692	49.7	6.5e-11	1	163292	HUMAN	Alpha-2-macroglobulin
[5]		P01023	66	934.409	5	1.7	SLGNVNFTVSAEALESQELCGTEVPSVPEHGR	HexNAc2Hex5+Cation:K@6	glycopepnew_HCDEThcDiTCIDpeptide_EThcDpd2	50.5	1	14484	50.8	3e-22	1	163292	HUMAN	Alpha-2-macroglobulin
[5]		P01023	66	1025.65	5	1.9	SLGNVNFTVSAEALESQELCGTEVPSVPEHGR	HexNAc3Hex5NeuAc@6	glycopepnew_HCDEThcDiTCIDpeptide_EThcDpd2	42.6	2	11880	44	5e-13	1	163292	HUMAN	Alpha-2-macroglobulin
[5]		P01023	66	1292.32	4	-2.8	SLGNVNFTVSAEALESQELCGTEVPSVPEHGR	HexNAc4Hex4Fuc2@6	glycopepnew_HCDEThcDiTCIDpeptide_EThcDpd2	48.617	1	13870	14.8	5.5e-05	1	163292	HUMAN	Alpha-2-macroglobulin
[5]		P01023	66	1074.06	5	-4.7	SLGNVNFTVSAEALESQELCGTEVPSVPEHGR	HexNAc4Hex5Fuc2+Cation:K@6	glycopepnew_HCDEThcDiTCIDpeptide_EThcDpd2	42.75	2	11924	40	6.9e-14	1	163292	HUMAN	Alpha-2-macroglobulin
[5]		P01023	66	1073.85	5	-5.6	SLGNVNFTVSAEALESQELCGTEVPSVPEHGR	HexNAc4Hex5NeuAc+Cation:K@6	glycopepnew_HCDEThcDiTCIDpeptide_EThcDpd2	42.867	1	11968	71	1.9e-25	1	163292	HUMAN	Alpha-2-macroglobulin
[13]		P01008	13	1096.72	4	-3.3	SLTFNETYQDISELVYGAK	HexNAc4Hex5Fuc2NeuAc@5	glycopepnew_HCDEThcDiTCIDpeptide_EThcDpd2	61.433	1	18000	25.1	2.7e-06	1	52602.9	HUMAN	Antithrombin-III
[13]		P01008	13	1096.97	4	-6.9	SLTFNETYQDISELVYGAK	HexNAc4Hex5Fuc4@5	glycopepnew_HCDEThcDiTCIDpeptide_EThcDpd2	61.317	1	17959	17.8	0.00017	1	52602.9	HUMAN	Antithrombin-III
[13]		P01008	13	1096.46	4	-1.1	SLTFNETYQDISELVYGAK	HexNAc4Hex5NeuAc2@5	glycopepnew_HCDEThcDiTCIDpeptide_EThcDpd2	60.933	2	17833	36.4	1.9e-12	1	52602.9	HUMAN	Antithrombin-III
[13]		P01008	13	1105.95	4	-2.3	SLTFNETYQDISELVYGAK	HexNAc4Hex5NeuAc2+Cation:K@5	glycopepnew_HCDEThcDiTCIDpeptide_EThcDpd2	60.733	2	17770	46.9	1.8e-15	1	52602.9	HUMAN	Antithrombin-III
[5]		P01023	66	1322.58	4	-5.9	SNATTDEHGLVQFSINTTNVMGTSLTVRVNYK	HexNAc4Hex4NeuAc+Cation:K@16=18	glycopepnew_HCDEThcDiTCIDpeptide_EThcDpd2	66.517	2	19615	10.3	7.2e-05	1	163292	HUMAN	Alpha-2-macroglobulin
[5]		P01023	66	1052.23	4	2.7	SNQTLSLFFTVLQDVPVR	HexNAc6Hex3FucNeuAc@2	glycopepnew_HCDEThcDiTCIDpeptide_EThcDpd2	53.45	2	15450	19.9	0.0002	1	163292	HUMAN	Alpha-2-macroglobulin
[1]		P01009	129	1203.29	4	0.99	SNSTNIFFSPVSIATAFAMLSLGTK	HexNAc4Hex5Fuc2NeuAc@2	glycopepnew_HCDEThcDiTCIDpeptide_EThcDpd2	80.067	2	23934	17.4	1.2e-05	1	46736.9	HUMAN	Alpha-1-antitrypsin
[1]		P01009	129	1212.77	4	-6.2	SNSTNIFFSPVSIATAFAMLSLGTK	HexNAc4Hex5Fuc2NeuAc+Cation:K@2	glycopepnew_HCDEThcDiTCIDpeptide_EThcDpd2	80.117	1	23954	10.2	5.3e-05	1	46736.9	HUMAN	Alpha-1-antitrypsin
[1]		P01009	129	1032.45	5	-3.1	SNSTNIFFSPVSIATAFAMLSLGTK	HexNAc5Hex5FucNeuAc2@2	glycopepnew_HCDEThcDiTCIDpeptide_EThcDpd2	61.617	1	18061	22.4	3.5e-06	1	46736.9	HUMAN	Alpha-1-antitrypsin
[1]		P01009	129	1395.34	4	-0.21	SNSTNIFFSPVSIATAFAMLSLGTK	HexNAc6Hex7Fuc2NeuAc+Cation:K@2	glycopepnew_HCDEThcDiTCIDpeptide_EThcDpd2	80.1	1	23943	39.2	1.3e-09	1	46736.9	HUMAN	Alpha-1-antitrypsin
[1]		P01009	129	1395.6	4	0.074	SNSTNIFFSPVSIATAFAMLSLGTK	HexNAc6Hex7Fuc4+Cation:K@2=27	glycopepnew_HCDEThcDiTCIDpeptide_EThcDpd2	80.283	1	23998	13.2	3.3e-05	1	46736.9	HUMAN	Alpha-1-antitrypsin
[4]		P02787	67	959.964	5	5.1	SNVTDCSGNFCLFR	HexNAc6Hex7FucNeuAc2+Cation:K@2	glycopepnew_HCDEThcDiTCIDpeptide_EThcDpd2	42.6	1	11878	28.6	5.7e-10	1	77064.7	HUMAN	Serotransferrin
[15]		P00734	10	1290.8	4	-0.37	SRYPHKPEINSTTHPGADLQENFCR	HexNAc4Hex5Fuc2NeuAc@10	glycopepnew_HCDEThcDiTCIDpeptide_EThcDpd2	22.567	1	5189	32.9	1.7e-10	1	70037.5	HUMAN	Prothrombin
[12]		P01871	14	800.926	5	-6.5	STGKPTLYNVSLVMSDT	HexNAc5Hex6Fuc+Cation:K&Oxidation@(9&14)||HexNAc5Hex7+Cation:K@9	glycopepnew_HCDEThcDiTCIDpeptide_EThcDpd2	24.883	1	5964	15.1	1.3e-06	1	49440.2	HUMAN	Immunoglobulin heavy constant mu
[6]		P02763	69	1227.5	3	-4.6	SVQEIQATFFYFTPN	HexNAc6Hex3Fuc+Cation:K@15	glycopepnew_HCDEThcDiTCIDpeptide_EThcDpd2	62.867	2	18459	13	7e-06	2	23511.8	HUMAN	Alpha-1-acid glycoprotein 1
[6]		P02763	69	1031.94	4	0.95	SVQEIQATFFYFTPNK	HexNAc4Hex5NeuAc2@15	glycopepnew_HCDEThcDiTCIDpeptide_EThcDpd2	54.7	1	15843	29.8	1e-08	2	23511.8	HUMAN	Alpha-1-acid glycoprotein 1
[6]		P02763	69	1041.43	4	-0.54	SVQEIQATFFYFTPNK	HexNAc4Hex5NeuAc2+Cation:K@15	glycopepnew_HCDEThcDiTCIDpeptide_EThcDpd2	53.617	1	15497	35.7	1.2e-13	2	23511.8	HUMAN	Alpha-1-acid glycoprotein 1
[6]		P02763	69	1232.51	4	-0.77	SVQEIQATFFYFTPNK	HexNAc5Hex6FucNeuAc3@15	glycopepnew_HCDEThcDiTCIDpeptide_EThcDpd2	64.433	2	18949	20.5	3.3e-07	2	23511.8	HUMAN	Alpha-1-acid glycoprotein 1
[6]		P02763	69	1059.93	4	-3.5	SVQEIQATFFYFTPNK	HexNAc5Hex6NeuAc+Cation:K@15	glycopepnew_HCDEThcDiTCIDpeptide_EThcDpd2	45.967	1	13015	34.4	1.3e-12	2	23511.8	HUMAN	Alpha-1-acid glycoprotein 1
[6]		P02763	69	1195.99	4	-0.22	SVQEIQATFFYFTPNK	HexNAc5Hex6NeuAc3@15||HexNAc6Hex9Fuc+Cation:K@15	glycopepnew_HCDEThcDiTCIDpeptide_EThcDpd2	62.217	2	18261	28.9	2.1e-09	2	23511.8	HUMAN	Alpha-1-acid glycoprotein 1
[6]		P02763	69	1205.48	4	-0.8	SVQEIQATFFYFTPNK	HexNAc5Hex6NeuAc3+Cation:K@15	glycopepnew_HCDEThcDiTCIDpeptide_EThcDpd2	63.267	2	18578	33.5	4.7e-11	2	23511.8	HUMAN	Alpha-1-acid glycoprotein 1
[6]		P02763	69	1283.28	4	-1.4	SVQEIQATFFYFTPNK	HexNAc6Hex6FucNeuAc3@15	glycopepnew_HCDEThcDiTCIDpeptide_EThcDpd2	53.4	2	15433	13	0.00017	2	23511.8	HUMAN	Alpha-1-acid glycoprotein 1
[6]		P02763	69	1297.02	4	-4.5	SVQEIQATFFYFTPNK	HexNAc6Hex7Fuc2NeuAc2+Cation:K@15	glycopepnew_HCDEThcDiTCIDpeptide_EThcDpd2	65.267	1	19212	22.2	3.2e-08	2	23511.8	HUMAN	Alpha-1-acid glycoprotein 1
[6]		P02763	69	1369.79	4	-2.6	SVQEIQATFFYFTPNK	HexNAc6Hex7Fuc2NeuAc3+Cation:K@15	glycopepnew_HCDEThcDiTCIDpeptide_EThcDpd2	80.817	1	24153	18.5	2.5e-08	2	23511.8	HUMAN	Alpha-1-acid glycoprotein 1
[6]		P02763	69	1287.78	4	-7.5	SVQEIQATFFYFTPNK	HexNAc6Hex7Fuc4NeuAc@15	glycopepnew_HCDEThcDiTCIDpeptide_EThcDpd2	64.783	2	19062	16	1.3e-05	2	23511.8	HUMAN	Alpha-1-acid glycoprotein 1
[6]		P02763	69	1214.51	4	2	SVQEIQATFFYFTPNK	HexNAc6Hex7NeuAc2@15	glycopepnew_HCDEThcDiTCIDpeptide_EThcDpd2	53.033	1	15313	27.3	3.4e-09	2	23511.8	HUMAN	Alpha-1-acid glycoprotein 1
[6]		P02763	69	1287.28	4	2.4	SVQEIQATFFYFTPNK	HexNAc6Hex7NeuAc3@15	glycopepnew_HCDEThcDiTCIDpeptide_EThcDpd2	61.05	1	17866	24	3.8e-09	2	23511.8	HUMAN	Alpha-1-acid glycoprotein 1
[6]		P02763	69	1296.76	4	-1.1	SVQEIQATFFYFTPNK	HexNAc6Hex7NeuAc3+Cation:K@15	glycopepnew_HCDEThcDiTCIDpeptide_EThcDpd2	63.75	1	18729	26.6	2.7e-08	2	23511.8	HUMAN	Alpha-1-acid glycoprotein 1
[6]		P02763	69	1360.05	4	0.96	SVQEIQATFFYFTPNK	HexNAc6Hex7NeuAc4@15	glycopepnew_HCDEThcDiTCIDpeptide_EThcDpd2	80.75	1	24133	24	2.1e-11	2	23511.8	HUMAN	Alpha-1-acid glycoprotein 1
[6]		P02763	69	1369.53	4	-5.2	SVQEIQATFFYFTPNK	HexNAc6Hex7NeuAc4+Cation:K@15	glycopepnew_HCDEThcDiTCIDpeptide_EThcDpd2	81.567	2	24377	24	5.2e-08	2	23511.8	HUMAN	Alpha-1-acid glycoprotein 1
[6]		P02763	69	1242.5	4	-4.5	SVQEIQATFFYFTPNK	HexNAc7Hex8NeuAc+Cation:K@15	glycopepnew_HCDEThcDiTCIDpeptide_EThcDpd2	64.517	2	18977	10	5e-05	2	23511.8	HUMAN	Alpha-1-acid glycoprotein 1
[6]		P02763	69	1030.62	5	-5.7	SVQEIQATFFYFTPNK	HexNAc8Hex9Fuc@15	glycopepnew_HCDEThcDiTCIDpeptide_EThcDpd2	63	1	18492	15.8	0.00021	2	23511.8	HUMAN	Alpha-1-acid glycoprotein 1
[6]		P02763	69	1227.83	3	-4	SVQEIQATFFYFTPNKTED	HexNAc2Hex6+Cation:K@15	glycopepnew_HCDEThcDiTCIDpeptide_EThcDpd2	62.967	1	18482	18.1	5.2e-09	2	23511.8	HUMAN	Alpha-1-acid glycoprotein 1
[6]		P02763	69	1201.23	4	-6.5	SVQEIQATFFYFTPNKTED	HexNAc6Hex7Fuc+Cation:K@15	glycopepnew_HCDEThcDiTCIDpeptide_EThcDpd2	53.017	1	15311	21.7	3.2e-07	2	23511.8	HUMAN	Alpha-1-acid glycoprotein 1
[6]		P02763	69	1355.8	4	-7	SVQEIQATFFYFTPNKTED	HexNAc7Hex8FucNeuAc@15	glycopepnew_HCDEThcDiTCIDpeptide_EThcDpd2	63.1	1	18526	16.6	3.7e-06	2	23511.8	HUMAN	Alpha-1-acid glycoprotein 1
[6]		P02763	69	1191.49	4	-1.1	SVQEIQATFFYFTPNKTED	HexNAc9Hex3Fuc+Cation:K@15	glycopepnew_HCDEThcDiTCIDpeptide_EThcDpd2	53.217	2	15374	22.9	3.9e-06	2	23511.8	HUMAN	Alpha-1-acid glycoprotein 1
[6]		P02763	69	1379.06	4	-0.86	SVQEIQATFFYFTPNKTEDT	HexNAc6Hex11Fuc@15	glycopepnew_HCDEThcDiTCIDpeptide_EThcDpd2	61.983	1	18177	13	7.5e-05	2	23511.8	HUMAN	Alpha-1-acid glycoprotein 1
[6]		P02763	69	1118.97	4	-4.7	SVQEIQATFFYFTPNKTEDTI	HexNAc5Hex4Fuc2+Cation:K@15	glycopepnew_HCDEThcDiTCIDpeptide_EThcDpd2	46.017	1	13035	16	3.5e-05	2	23511.8	HUMAN	Alpha-1-acid glycoprotein 1
[6]		P02763	69	1210.25	4	-7	SVQEIQATFFYFTPNKTEDTI	HexNAc6Hex5Fuc2+Cation:K@15	glycopepnew_HCDEThcDiTCIDpeptide_EThcDpd2	45.65	2	12903	27.1	1.1e-08	2	23511.8	HUMAN	Alpha-1-acid glycoprotein 1
[6]		P02763	69	1360.31	4	-3.1	SVQEIQATFFYFTPNKTEDTI	HexNAc8Hex8+Cation:K@15	glycopepnew_HCDEThcDiTCIDpeptide_EThcDpd2	82.95	2	24778	22.6	1.1e-08	2	23511.8	HUMAN	Alpha-1-acid glycoprotein 1
[6]		P02763	69	1031.94	4	-5.4	SVQEIQATFFYFTPNKTEDTIF	HexNAc4Hex4+Cation:K@15	glycopepnew_HCDEThcDiTCIDpeptide_EThcDpd2	53.683	2	15523	41.5	3.8e-14	2	23511.8	HUMAN	Alpha-1-acid glycoprotein 1
[6]		P02763	69	1287.28	4	-5.6	SVQEIQATFFYFTPNKTEDTIF	HexNAc6Hex6NeuAc+Cation:K@15	glycopepnew_HCDEThcDiTCIDpeptide_EThcDpd2	61.967	3	18172	27.1	2.3e-10	2	23511.8	HUMAN	Alpha-1-acid glycoprotein 1
[6]		P02763	69	1367.35	4	0.11	SVQEIQATFFYFTPNKTEDTIFLR	HexNAc5Hex6Fuc2NeuAc@15	glycopepnew_HCDEThcDiTCIDpeptide_EThcDpd2	53.4	3	15437	35.5	3.1e-06	2	23511.8	HUMAN	Alpha-1-acid glycoprotein 1
[6]		P02763	69	1232.92	5	4.8	SVQEIQATFFYFTPNKTEDTIFLR	HexNAc6Hex7Fuc2NeuAc2+Cation:K@15	glycopepnew_HCDEThcDiTCIDpeptide_EThcDpd2	59.5	2	17372	36.6	1.8e-14	2	23511.8	HUMAN	Alpha-1-acid glycoprotein 1
[6]		P02763	69	1200.92	5	6.9	SVQEIQATFFYFTPNKTEDTIFLR	HexNAc8Hex8Fuc+Cation:K@15	glycopepnew_HCDEThcDiTCIDpeptide_EThcDpd2	52.683	1	15198	18.8	1.8e-06	2	23511.8	HUMAN	Alpha-1-acid glycoprotein 1
[6]		P02763	69	1225.73	5	-4.5	SVQEIQATFFYFTPNKTEDTIFLR	HexNAc8Hex9Fuc@15	glycopepnew_HCDEThcDiTCIDpeptide_EThcDpd2	59.017	1	17224	19.6	2.6e-05	2	23511.8	HUMAN	Alpha-1-acid glycoprotein 1
[7]		P02790	34	949.118	4	-1.1	SWPAVGNCSSALR	HexNAc4Hex5FucNeuAc2+Cation:K@7	glycopepnew_HCDEThcDiTCIDpeptide_EThcDpd2	36.583	1	9816	35.9	4.5e-13	1	51676.8	HUMAN	Hemopexin
[7]		P02790	34	903.117	4	1.1	SWPAVGNCSSALR	HexNAc4Hex5NeuAc2@7	glycopepnew_HCDEThcDiTCIDpeptide_EThcDpd2	36.35	1	9741	27.2	2.1e-11	1	51676.8	HUMAN	Hemopexin
[7]		P02790	34	912.603	4	-1.6	SWPAVGNCSSALR	HexNAc4Hex5NeuAc2+Cation:K@7=35	glycopepnew_HCDEThcDiTCIDpeptide_EThcDpd2	36.267	1	9711	51.6	6.8e-12	1	51676.8	HUMAN	Hemopexin
[5]		P01023	66	1167.24	4	7.5	SYLNETVTVSASLESVR	HexNAc6Hex6NeuAc2+Cation:K@4	glycopepnew_HCDEThcDiTCIDpeptide_EThcDpd2	64.717	2	19042	20.5	2.1e-05	1	163292	HUMAN	Alpha-2-macroglobulin
[1]		P01009	129	1288.76	5	-0.2	THDEILEGLNFNLTEIPEAQIHEGFQELLR	HexNAc5Hex8Fuc4+Cation:K@12	glycopepnew_HCDEThcDiTCIDpeptide_EThcDpd2	60.15	2	17580	13.2	2.7e-05	1	46736.9	HUMAN	Alpha-1-antitrypsin
[1]		P01009	129	1311.57	5	-2.4	THDEILEGLNFNLTEIPEAQIHEGFQELLR	HexNAc6Hex5FucNeuAc3@12	glycopepnew_HCDEThcDiTCIDpeptide_EThcDpd2	66.2	2	19516	34.2	2.6e-11	1	46736.9	HUMAN	Alpha-1-antitrypsin
[10-1]	16	P01859	20	834.36	4	-0.85	TKPREEQFNSTFR	HexNAc3Hex4FucNeuAc@9	glycopepnew_HCDEThcDiTCIDpeptide_EThcDpd2	16.65	2	3154	27.9	7.5e-08	1	35901	HUMAN	Immunoglobulin heavy constant gamma 2
[10-1]	16	P01859	20	812.357	4	0.91	TKPREEQFNSTFR	HexNAc4Hex4Fuc@9	glycopepnew_HCDEThcDiTCIDpeptide_EThcDpd2	15.567	1	2767	25.1	2.9e-09	1	35901	HUMAN	Immunoglobulin heavy constant gamma 2
[17]		P01011	12	1105.47	4	2.3	TLNQSSDELQLSMGNAMFVK	HexNAc4Hex5Fuc2NeuAc@3	glycopepnew_HCDEThcDiTCIDpeptide_EThcDpd2	50.9	1	14608	22	5.6e-05	1	47651.3	HUMAN	Alpha-1-antichymotrypsin
[17]		P01011	12	1114.95	4	-3.9	TLNQSSDELQLSMGNAMFVK	HexNAc4Hex5Fuc2NeuAc+Cation:K@3	glycopepnew_HCDEThcDiTCIDpeptide_EThcDpd2	50.033	1	14327	24	2.5e-08	1	47651.3	HUMAN	Alpha-1-antichymotrypsin
[17]		P01011	12	1114.7	4	-2	TLNQSSDELQLSMGNAMFVK	HexNAc4Hex5NeuAc2+Cation:K@3=78	glycopepnew_HCDEThcDiTCIDpeptide_EThcDpd2	49.517	2	14171	48.1	3.4e-17	1	47651.3	HUMAN	Alpha-1-antichymotrypsin
[17]		P01011	12	1196.75	4	-4.9	TLNQSSDELQLSMGNAMFVK	HexNAc5Hex6Fuc2NeuAc@3	glycopepnew_HCDEThcDiTCIDpeptide_EThcDpd2	49.55	3	14183	13.2	0.00012	1	47651.3	HUMAN	Alpha-1-antichymotrypsin
[17]		P01011	12	1270.02	4	-5.6	TLNQSSDELQLSMGNAMFVK	HexNAc7Hex8Fuc@3	glycopepnew_HCDEThcDiTCIDpeptide_EThcDpd2	61.033	2	17864	17.9	2.5e-06	1	47651.3	HUMAN	Alpha-1-antichymotrypsin
[29]		P05543	4	1082.96	4	-1.9	TLYETEVFSTDFSNISAAK	HexNAc4Hex5Fuc2NeuAc@14	glycopepnew_HCDEThcDiTCIDpeptide_EThcDpd2	49.383	1	14126	31.6	1.2e-09	1	46324.9	HUMAN	Thyroxine-binding globulin
[2-1]	26	P01877	98	692.042	4	-2.4	TPLTANITK	HexNAc4Hex5Fuc+Cation:K@6	glycopepnew_HCDEThcDiTCIDpeptide_EThcDpd2	18.417	1	3771	25.2	1.2e-10	1	36591.7	HUMAN	Immunoglobulin heavy constant alpha 2
[2-1]	26	P01877	98	764.816	4	-1.7	TPLTANITK	HexNAc4Hex5FucNeuAc+Cation:K@6	glycopepnew_HCDEThcDiTCIDpeptide_EThcDpd2	22.617	2	5211	27.4	1.2e-10	1	36591.7	HUMAN	Immunoglobulin heavy constant alpha 2
[2-1]	26	P01877	98	702.298	4	-3.2	TPLTANITK	HexNAc5Hex4Fuc+Cation:K@6	glycopepnew_HCDEThcDiTCIDpeptide_EThcDpd2	18.85	1	3920	13.9	3.4e-07	1	36591.7	HUMAN	Immunoglobulin heavy constant alpha 2
[2-1]	26	P01877	98	742.811	4	-2.9	TPLTANITK	HexNAc5Hex5Fuc+Cation:K@6	glycopepnew_HCDEThcDiTCIDpeptide_EThcDpd2	18.617	1	3839	27.4	3.4e-08	1	36591.7	HUMAN	Immunoglobulin heavy constant alpha 2
[2-1]	26	P01877	98	815.586	4	-1.8	TPLTANITK	HexNAc5Hex5FucNeuAc+Cation:K@6	glycopepnew_HCDEThcDiTCIDpeptide_EThcDpd2	22.7	1	5234	32.5	5.5e-11	1	36591.7	HUMAN	Immunoglobulin heavy constant alpha 2
[20]		P43652	8	1377.82	4	0.14	TTCCTLSEEFACVDNLADLVFGELCGVNENR	HexNAc4Hex5Fuc2@30	glycopepnew_HCDEThcDiTCIDpeptide_EThcDpd2	68.067	2	20095	24.3	1.3e-07	1	69069.8	HUMAN	Afamin
[20]		P43652	8	1168.26	5	-4.5	TTCCTLSEEFACVDNLADLVFGELCGVNENR	HexNAc4Hex5Fuc2NeuAc+Cation:K@30	glycopepnew_HCDEThcDiTCIDpeptide_EThcDpd2	75.85	1	22610	20.6	2e-09	1	69069.8	HUMAN	Afamin
[20]		P43652	8	1377.57	4	1.5	TTCCTLSEEFACVDNLADLVFGELCGVNENR	HexNAc4Hex5NeuAc@30	glycopepnew_HCDEThcDiTCIDpeptide_EThcDpd2	68.133	1	20114	24.2	2e-08	1	69069.8	HUMAN	Afamin
[20]		P43652	8	1160.47	5	0.36	TTCCTLSEEFACVDNLADLVFGELCGVNENR	HexNAc4Hex5NeuAc2@30	glycopepnew_HCDEThcDiTCIDpeptide_EThcDpd2	75.933	1	22634	17.6	2.5e-08	1	69069.8	HUMAN	Afamin
[5]		P01023	66	1102.48	4	-5.3	TTDEHGLVQFSINTTNVMGTSLTVR	HexNAc5Hex3Fuc+Cation:K@13	glycopepnew_HCDEThcDiTCIDpeptide_EThcDpd2	34.55	2	9132	17.4	0.00013	1	163292	HUMAN	Alpha-2-macroglobulin
[8]		P01024	26	994.428	3	-0.071	TVLTPATNHMGNVTF	HexNAc2Hex6@12=10	glycopepnew_HCDEThcDiTCIDpeptide_EThcDpd2	30.983	1	7933	23.2	6e-08	1	187150	HUMAN	Complement C3
[8]		P01024	26	878.635	4	-2.7	TVLTPATNHMGNVTFTI	HexNAc3Hex4FucNeuAc@12	glycopepnew_HCDEThcDiTCIDpeptide_EThcDpd2	32.333	1	8389	19	1.8e-07	1	187150	HUMAN	Complement C3
[8]		P01024	26	918.899	4	2.4	TVLTPATNHMGNVTFTIP	Oxidation@10;HexNAc6Hex3+Cation:K@12	glycopepnew_HCDEThcDiTCIDpeptide_EThcDpd2	32.35	1	8391	17.5	6.5e-06	1	187150	HUMAN	Complement C3
[8]		P01024	26	1103.85	3	-0.19	TVLTPATNHMGNVTFTIPANR	HexNAc2Hex4@12=10	glycopepnew_HCDEThcDiTCIDpeptide_EThcDpd2	31.233	2	8035	33	1.8e-12	1	187150	HUMAN	Complement C3
[8]		P01024	26	874.148	4	7.5	TVLTPATNHMGNVTFTIPANR	HexNAc2Hex4Fuc+Cation:K@12=10	glycopepnew_HCDEThcDiTCIDpeptide_EThcDpd2	31.017	2	7950	52.6	5.3e-18	1	187150	HUMAN	Complement C3
[8]		P01024	26	868.653	4	1.5	TVLTPATNHMGNVTFTIPANR	HexNAc2Hex5@12=9	glycopepnew_HCDEThcDiTCIDpeptide_EThcDpd2	31.017	1	7948	66	1.3e-20	1	187150	HUMAN	Complement C3
[8]		P01024	26	909.166	4	1.5	TVLTPATNHMGNVTFTIPANR	HexNAc2Hex5Fuc&Oxidation@(12&10)||HexNAc2Hex6@12	glycopepnew_HCDEThcDiTCIDpeptide_EThcDpd2	30.933	1	7912	64.1	6.3e-18	1	187150	HUMAN	Complement C3
[8]		P01024	26	959.165	4	-1.4	TVLTPATNHMGNVTFTIPANR	HexNAc2Hex7+Cation:K@12=11	glycopepnew_HCDEThcDiTCIDpeptide_EThcDpd2	30.883	1	7895	46.8	1.7e-17	1	187150	HUMAN	Complement C3
[8]		P01024	26	1032.71	4	1.7	TVLTPATNHMGNVTFTIPANR	HexNAc3Hex5FucNeuAc&Oxidation@(12&10)||HexNAc3Hex6NeuAc@12	glycopepnew_HCDEThcDiTCIDpeptide_EThcDpd2	34.467	1	9104	45.2	2.1e-12	1	187150	HUMAN	Complement C3
[8]		P01024	26	1042.2	4	-0.87	TVLTPATNHMGNVTFTIPANR	HexNAc3Hex6NeuAc+Cation:K@12=11	glycopepnew_HCDEThcDiTCIDpeptide_EThcDpd2	34.467	2	9106	41	3.7e-15	1	187150	HUMAN	Complement C3
[8]		P01024	26	1047.22	4	-0.99	TVLTPATNHMGNVTFTIPANR	HexNAc4Hex5Fuc2&Oxidation@(12&10)||HexNAc4Hex6Fuc@12	glycopepnew_HCDEThcDiTCIDpeptide_EThcDpd2	25.35	1	6111	23.7	6.1e-07	1	187150	HUMAN	Complement C3
[8]		P01024	26	882.908	4	1.4	TVLTPATNHMGNVTFTIPANR	Oxidation@10;HexNAc3Hex4@12	glycopepnew_HCDEThcDiTCIDpeptide_EThcDpd2	22.883	1	5297	42.9	2e-10	1	187150	HUMAN	Complement C3
[8]		P01024	26	923.422	4	1.8	TVLTPATNHMGNVTFTIPANR	Oxidation@10;HexNAc3Hex5@12	glycopepnew_HCDEThcDiTCIDpeptide_EThcDpd2	22.767	2	5257	36.8	1.2e-08	1	187150	HUMAN	Complement C3
[8]		P01024	26	746.528	5	-0.42	TVLTPATNHMGNVTFTIPANR	Oxidation@10;HexNAc3Hex5+Cation:K@12	glycopepnew_HCDEThcDiTCIDpeptide_EThcDpd2	22.8	1	5268	37	1.1e-10	1	187150	HUMAN	Complement C3
[8]		P01024	26	963.934	4	1.1	TVLTPATNHMGNVTFTIPANR	Oxidation@10;HexNAc3Hex6@12	glycopepnew_HCDEThcDiTCIDpeptide_EThcDpd2	22.633	1	5213	28.7	1e-06	1	187150	HUMAN	Complement C3
[8]		P01024	26	897.168	4	2.9	TVLTPATNHMGNVTFTIPANREF	HexNAc2Hex3Fuc&Oxidation@(12&10)||HexNAc2Hex4@12	glycopepnew_HCDEThcDiTCIDpeptide_EThcDpd2	22.817	2	5281	22	9e-06	1	187150	HUMAN	Complement C3
[8]		P01024	26	1024.76	6	-2.7	TVLTPATNHMGNVTFTIPANREFK	HexNAc7Hex8FucNeuAc2+Cation:K@12	glycopepnew_HCDEThcDiTCIDpeptide_EThcDpd2	33.117	1	8652	12.6	0.00011	1	187150	HUMAN	Complement C3
[22]		P02765	6	1027.19	4	4.3	VCQDCPLLAPLNDTRVVHA	HexNAc3Hex7Fuc+Cation:K@12	glycopepnew_HCDEThcDiTCIDpeptide_EThcDpd2	35.983	1	9621	16	4e-05	1	39325	HUMAN	Alpha-2-HS-glycoprotein
[19]		O75882	9	759.858	4	1.2	VFHIHNESWVLLTPK	HexNAc2Hex5@6=21	glycopepnew_HCDEThcDiTCIDpeptide_EThcDpd2	28.85	1	7242	25.1	2.9e-07	1	158538	HUMAN	Attractin
[19]		O75882	9	842.889	4	1	VFHIHNESWVLLTPK	HexNAc3Hex4NeuAc@6	glycopepnew_HCDEThcDiTCIDpeptide_EThcDpd2	32.417	1	8414	19.8	0.00013	1	158538	HUMAN	Attractin
[19]		O75882	9	851.142	4	1.5	VFHIHNESWVLLTPK	HexNAc3Hex6@6=61	glycopepnew_HCDEThcDiTCIDpeptide_EThcDpd2	28.6	1	7167	40.9	1.8e-16	1	158538	HUMAN	Attractin
[2-1]	26	P01877	98	1380.81	5	-6.4	VFPLSLDSTPQDGNVVVACLVQGFFPQEPLSVTWSESGQNVT	HexNAc4Hex5FucNeuAc2@40	glycopepnew_HCDEThcDiTCIDpeptide_EThcDpd2	68.733	1	20309	19	3.3e-05	1	36591.7	HUMAN	Immunoglobulin heavy constant alpha 2
[2-1]	26	P01877	98	1388.8	5	-4.9	VFPLSLDSTPQDGNVVVACLVQGFFPQEPLSVTWSESGQNVT	HexNAc6Hex6Fuc+Cation:K&Oxidation@(40&34)||HexNAc6Hex7+Cation:K@40	glycopepnew_HCDEThcDiTCIDpeptide_EThcDpd2	66.9	2	19733	13	9e-06	1	36591.7	HUMAN	Immunoglobulin heavy constant alpha 2
[2-1]	26	P01877	98	1229.54	6	-2	VFPLSLDSTPQDGNVVVACLVQGFFPQEPLSVTWSESGQNVT	HexNAc6Hex9Fuc@40	glycopepnew_HCDEThcDiTCIDpeptide_EThcDpd2	73.833	1	21959	19.3	2.3e-07	1	36591.7	HUMAN	Immunoglobulin heavy constant alpha 2
[2-1]	26	P01877	98	1375.62	5	-0.4	VFPLSLDSTPQDGNVVVACLVQGFFPQEPLSVTWSESGQNVTAR	HexNAc4Hex4Fuc2NeuAc+Cation:K&Oxidation@(40&34)||HexNAc4Hex5FucNeuAc+Cation:K@40	glycopepnew_HCDEThcDiTCIDpeptide_EThcDpd2	66.617	1	19644	26.6	5.8e-09	1	36591.7	HUMAN	Immunoglobulin heavy constant alpha 2
[2-1]	26	P01877	98	1375.81	5	-5.3	VFPLSLDSTPQDGNVVVACLVQGFFPQEPLSVTWSESGQNVTAR	HexNAc4Hex5Fuc3+Cation:K@40	glycopepnew_HCDEThcDiTCIDpeptide_EThcDpd2	66.85	1	19711	26.8	1.4e-07	1	36591.7	HUMAN	Immunoglobulin heavy constant alpha 2
[2-1]	26	P01877	98	1195.2	6	-4.7	VFPLSLDSTPQDGNVVVACLVQGFFPQEPLSVTWSESGQNVTAR	HexNAc4Hex5Fuc3NeuAc+Cation:K@40	glycopepnew_HCDEThcDiTCIDpeptide_EThcDpd2	73.6	1	21887	44	2.7e-11	1	36591.7	HUMAN	Immunoglobulin heavy constant alpha 2
[2-1]	26	P01877	98	1048.33	7	-1.9	VFPLSLDSTPQDGNVVVACLVQGFFPQEPLSVTWSESGQNVTAR	HexNAc7Hex7@40	glycopepnew_HCDEThcDiTCIDpeptide_EThcDpd2	73.517	1	21861	21	2.1e-07	1	36591.7	HUMAN	Immunoglobulin heavy constant alpha 2
[2-1]	26	P01877	98	1385.41	5	-4.1	VFPLSLDSTPQDGNVVVACLVQGFFPQEPLSVTWSESGQNVTAR	Oxidation@34;HexNAc4Hex7Fuc+Cation:K@40	glycopepnew_HCDEThcDiTCIDpeptide_EThcDpd2	66.467	2	19601	24.4	1.1e-05	1	36591.7	HUMAN	Immunoglobulin heavy constant alpha 2
[2-1]	26	P01877	98	1233.04	6	-3	VFPLSLDSTPQDGNVVVACLVQGFFPQEPLSVTWSESGQNVTARN	Oxidation@34;HexNAc6Hex4NeuAc2+Cation:K@40	glycopepnew_HCDEThcDiTCIDpeptide_EThcDpd2	73.317	1	21794	13.6	3.3e-05	1	36591.7	HUMAN	Immunoglobulin heavy constant alpha 2
[2-1]	26	P01877	98	1233.37	6	-8	VFPLSLDSTPQDGNVVVACLVQGFFPQEPLSVTWSESGQNVTARNF	HexNAc6Hex5NeuAc+Cation:K@40	glycopepnew_HCDEThcDiTCIDpeptide_EThcDpd2	73.833	2	21961	13.6	3.4e-05	1	36591.7	HUMAN	Immunoglobulin heavy constant alpha 2
[2-1]	26	P01877	98	1376.01	5	-4.1	VFPLSLDSTPQDGNVVVACLVQGFFPQEPLSVTWSESGQNVTARNF	Oxidation@34;HexNAc4Hex6+Cation:K@40	glycopepnew_HCDEThcDiTCIDpeptide_EThcDpd2	68.817	1	20333	16.6	9e-06	1	36591.7	HUMAN	Immunoglobulin heavy constant alpha 2
[2-1]	26	P01877	98	1350.62	5	-5.8	VFPLSLDSTPQDGNVVVACLVQGFFPQEPLSVTWSESGQNVTARNFPP	Oxidation@34;HexNAc5Hex3@40	glycopepnew_HCDEThcDiTCIDpeptide_EThcDpd2	61.283	2	17950	22	8.5e-08	1	36591.7	HUMAN	Immunoglobulin heavy constant alpha 2
[2-1]	26	P01877	98	1226.06	6	-0.11	VFPLSLDSTPQDGNVVVACLVQGFFPQEPLSVTWSESGQNVTARNFPPSQ	HexNAc6Hex3Fuc+Cation:K&Oxidation@(40&34)||HexNAc6Hex4+Cation:K@40	glycopepnew_HCDEThcDiTCIDpeptide_EThcDpd2	73.817	1	21957	10.6	0.00011	1	36591.7	HUMAN	Immunoglobulin heavy constant alpha 2
[34]		P05155	3	912.022	5	-3.1	VGQLQLSHNLSLVILVPQNLK	HexNAc4Hex5NeuAc2+Cation:K@9	glycopepnew_HCDEThcDiTCIDpeptide_EThcDpd2	49.433	1	14142	46.8	2.7e-15	1	55154.7	HUMAN	Plasma protease C1 inhibitor
[5]		P01023	66	1037.44	4	-0.67	VLDYLNETQQLTPEIK	HexNAc4Hex5NeuAc2+Cation:K@6	glycopepnew_HCDEThcDiTCIDpeptide_EThcDpd2	46.55	1	13208	46.4	1.3e-14	1	163292	HUMAN	Alpha-2-macroglobulin
[34]		P05155	3	1077.22	4	2.4	VLSNNSDANLELINTWVAK	HexNAc4Hex5NeuAc2@4	glycopepnew_HCDEThcDiTCIDpeptide_EThcDpd2	51.383	2	14776	47.1	2.7e-12	1	55154.7	HUMAN	Plasma protease C1 inhibitor
[5]		P01023	66	1066.25	5	1.5	VNFTVSAEALESQELCGTEVPSVPEHGR	HexNAc5Hex4Fuc2NeuAc+Cation:K@2	glycopepnew_HCDEThcDiTCIDpeptide_EThcDpd2	43.483	1	12187	21.4	5.2e-08	1	163292	HUMAN	Alpha-2-macroglobulin
[5]		P01023	66	1138.75	4	-0.78	VSNQTLSLFFTVLQDVPVR	HexNAc2Hex12+Cation:K@3||HexNAc4Hex5FucNeuAc2+Cation:K@3	glycopepnew_HCDEThcDiTCIDpeptide_EThcDpd2	68.75	2	20318	45.4	8.7e-15	1	163292	HUMAN	Alpha-2-macroglobulin
[5]		P01023	66	1098.24	4	3.9	VSNQTLSLFFTVLQDVPVR	HexNAc4Hex4FucNeuAc2+Cation:K@3	glycopepnew_HCDEThcDiTCIDpeptide_EThcDpd2	67.583	2	19951	46.2	3e-15	1	163292	HUMAN	Alpha-2-macroglobulin
[5]		P01023	66	1092.99	4	-3.8	VSNQTLSLFFTVLQDVPVR	HexNAc4Hex5Fuc2NeuAc@3	glycopepnew_HCDEThcDiTCIDpeptide_EThcDpd2	69.05	2	20414	18.8	7.2e-06	1	163292	HUMAN	Alpha-2-macroglobulin
[5]		P01023	66	911.399	5	-4.9	VSNQTLSLFFTVLQDVPVR	HexNAc4Hex5Fuc3NeuAc+Cation:K@3	glycopepnew_HCDEThcDiTCIDpeptide_EThcDpd2	68.8	1	20331	12.6	4.9e-05	1	163292	HUMAN	Alpha-2-macroglobulin
[5]		P01023	66	1056.49	4	1.4	VSNQTLSLFFTVLQDVPVR	HexNAc4Hex5FucNeuAc@3	glycopepnew_HCDEThcDiTCIDpeptide_EThcDpd2	59.4	1	17340	49.2	4.1e-12	1	163292	HUMAN	Alpha-2-macroglobulin
[5]		P01023	66	1065.97	4	-1.7	VSNQTLSLFFTVLQDVPVR	HexNAc4Hex5FucNeuAc+Cation:K@3	glycopepnew_HCDEThcDiTCIDpeptide_EThcDpd2	59.4	2	17345	52.9	4.1e-17	1	163292	HUMAN	Alpha-2-macroglobulin
[5]		P01023	66	1129.26	4	1.8	VSNQTLSLFFTVLQDVPVR	HexNAc4Hex5FucNeuAc2@3	glycopepnew_HCDEThcDiTCIDpeptide_EThcDpd2	68.85	1	20348	30.2	4.1e-07	1	163292	HUMAN	Alpha-2-macroglobulin
[5]		P01023	66	1019.97	4	1.2	VSNQTLSLFFTVLQDVPVR	HexNAc4Hex5NeuAc@3	glycopepnew_HCDEThcDiTCIDpeptide_EThcDpd2	59.517	1	17377	61.8	3.5e-15	1	163292	HUMAN	Alpha-2-macroglobulin
[5]		P01023	66	1029.46	4	-1.4	VSNQTLSLFFTVLQDVPVR	HexNAc4Hex5NeuAc+Cation:K@3	glycopepnew_HCDEThcDiTCIDpeptide_EThcDpd2	59.683	1	17423	53	7.9e-18	1	163292	HUMAN	Alpha-2-macroglobulin
[5]		P01023	66	1092.74	4	-0.78	VSNQTLSLFFTVLQDVPVR	HexNAc4Hex5NeuAc2@3	glycopepnew_HCDEThcDiTCIDpeptide_EThcDpd2	67.983	1	20075	43.9	8.2e-12	1	163292	HUMAN	Alpha-2-macroglobulin
[5]		P01023	66	1184.28	4	-0.67	VSNQTLSLFFTVLQDVPVR	HexNAc5Hex6Fuc2NeuAc@3	glycopepnew_HCDEThcDiTCIDpeptide_EThcDpd2	67.5	1	19920	34	4.4e-10	1	163292	HUMAN	Alpha-2-macroglobulin
[5]		P01023	66	1230.28	4	-5.6	VSNQTLSLFFTVLQDVPVR	HexNAc5Hex6Fuc3NeuAc+Cation:K@3	glycopepnew_HCDEThcDiTCIDpeptide_EThcDpd2	66.633	2	19653	13.9	5.5e-05	1	163292	HUMAN	Alpha-2-macroglobulin
[5]		P01023	66	1230.03	4	-1.3	VSNQTLSLFFTVLQDVPVR	HexNAc5Hex6FucNeuAc2+Cation:K@3	glycopepnew_HCDEThcDiTCIDpeptide_EThcDpd2	67.933	1	20057	20.1	4.4e-08	1	163292	HUMAN	Alpha-2-macroglobulin
[5]		P01023	66	1302.8	4	0.53	VSNQTLSLFFTVLQDVPVR	HexNAc5Hex6FucNeuAc3+Cation:K@3	glycopepnew_HCDEThcDiTCIDpeptide_EThcDpd2	78.233	2	23363	20.5	1.3e-06	1	163292	HUMAN	Alpha-2-macroglobulin
[5]		P01023	66	1184.03	4	0.75	VSNQTLSLFFTVLQDVPVR	HexNAc5Hex6NeuAc2@3	glycopepnew_HCDEThcDiTCIDpeptide_EThcDpd2	67.017	1	19764	42.6	2.5e-11	1	163292	HUMAN	Alpha-2-macroglobulin
[5]		P01023	66	1266.29	4	-1.6	VSNQTLSLFFTVLQDVPVR	HexNAc5Hex6NeuAc3+Cation:K@3	glycopepnew_HCDEThcDiTCIDpeptide_EThcDpd2	78.7	2	23506	38.1	1.7e-11	1	163292	HUMAN	Alpha-2-macroglobulin
[5]		P01023	66	1252.53	4	-2.7	VSNQTLSLFFTVLQDVPVR	HexNAc6Hex8NeuAc+Cation:K@3	glycopepnew_HCDEThcDiTCIDpeptide_EThcDpd2	66.85	2	19713	25.2	8.8e-11	1	163292	HUMAN	Alpha-2-macroglobulin
[29]		P05543	4	971.153	4	3.3	VTACHSSQPNATLYK	HexNAc4Hex5NeuAc2@10	glycopepnew_HCDEThcDiTCIDpeptide_EThcDpd2	19.85	1	4264	47.8	2.2e-12	1	46324.9	HUMAN	Thyroxine-binding globulin
[29]		P05543	4	980.636	4	-3.5	VTACHSSQPNATLYK	HexNAc4Hex5NeuAc2+Cation:K@10	glycopepnew_HCDEThcDiTCIDpeptide_EThcDpd2	19.967	1	4304	40.5	3.9e-15	1	46324.9	HUMAN	Thyroxine-binding globulin
[11]		P08185	21	1109.26	5	1.2	VTISGVYDLGDVLEEMGIADLFTNQAN	HexNAc5Hex9Fuc+Cation:K@27	glycopepnew_HCDEThcDiTCIDpeptide_EThcDpd2	79.283	1	23695	13	3e-06	1	45141.3	HUMAN	Corticosteroid-binding globulin
[11]		P08185	21	1386.83	4	-3.8	VTISGVYDLGDVLEEMGIADLFTNQAN	HexNAc6Hex7NeuAc&Oxidation@(27&16)||HexNAc9Hex4Fuc+Cation:K@27	glycopepnew_HCDEThcDiTCIDpeptide_EThcDpd2	80.017	2	23920	16.6	0.00013	1	45141.3	HUMAN	Corticosteroid-binding globulin
[11]		P08185	21	1380.08	4	-1.2	VTISGVYDLGDVLEEMGIADLFTNQANFSR	HexNAc2Hex11+Cation:K&Oxidation@(27&16)||HexNAc4Hex4FucNeuAc2+Cation:K&Oxidation@(27&16)||HexNAc4Hex5NeuAc2+Cation:K@27	glycopepnew_HCDEThcDiTCIDpeptide_EThcDpd2	79.25	2	23685	35.3	6.8e-12	1	45141.3	HUMAN	Corticosteroid-binding globulin
[11]		P08185	21	1374.84	4	-4.4	VTISGVYDLGDVLEEMGIADLFTNQANFSR	HexNAc4Hex5Fuc2NeuAc&Oxidation@(27&16)||HexNAc4Hex6FucNeuAc@27	glycopepnew_HCDEThcDiTCIDpeptide_EThcDpd2	69.467	2	20552	20.6	4.6e-07	1	45141.3	HUMAN	Corticosteroid-binding globulin
[11]		P08185	21	1370.85	4	-2.7	VTISGVYDLGDVLEEMGIADLFTNQANFSR	HexNAc4Hex5Fuc2NeuAc@27	glycopepnew_HCDEThcDiTCIDpeptide_EThcDpd2	79.55	2	23778	30.1	1.8e-09	1	45141.3	HUMAN	Corticosteroid-binding globulin
[11]		P08185	21	1104.47	5	-1.2	VTISGVYDLGDVLEEMGIADLFTNQANFSR	HexNAc4Hex5Fuc2NeuAc+Cation:K@27	glycopepnew_HCDEThcDiTCIDpeptide_EThcDpd2	79.067	1	23623	27.6	6.7e-11	1	45141.3	HUMAN	Corticosteroid-binding globulin
[11]		P08185	21	1371.1	4	0.31	VTISGVYDLGDVLEEMGIADLFTNQANFSR	HexNAc4Hex5Fuc4@27||HexNAc6Hex6&Oxidation@(27&16)	glycopepnew_HCDEThcDiTCIDpeptide_EThcDpd2	80.167	2	23968	19.9	1.1e-05	1	45141.3	HUMAN	Corticosteroid-binding globulin
[11]		P08185	21	1380.59	4	-2.3	VTISGVYDLGDVLEEMGIADLFTNQANFSR	HexNAc4Hex5Fuc4+Cation:K@27||HexNAc6Hex6+Cation:K&Oxidation@(27&16)	glycopepnew_HCDEThcDiTCIDpeptide_EThcDpd2	79.533	1	23768	15.1	4.6e-05	1	45141.3	HUMAN	Corticosteroid-binding globulin
[11]		P08185	21	1370.59	4	-3.4	VTISGVYDLGDVLEEMGIADLFTNQANFSR	HexNAc4Hex5NeuAc2@27	glycopepnew_HCDEThcDiTCIDpeptide_EThcDpd2	78.9	1	23570	34.4	9.6e-11	1	45141.3	HUMAN	Corticosteroid-binding globulin
[11]		P08185	21	1385.1	4	-4.2	VTISGVYDLGDVLEEMGIADLFTNQANFSR	HexNAc5Hex4Fuc2NeuAc&Oxidation@(27&16)||HexNAc5Hex5FucNeuAc@27	glycopepnew_HCDEThcDiTCIDpeptide_EThcDpd2	58.867	1	17167	24.1	1.3e-06	1	45141.3	HUMAN	Corticosteroid-binding globulin
[11]		P08185	21	1376.59	4	2.3	VTISGVYDLGDVLEEMGIADLFTNQANFSR	HexNAc6Hex5Fuc+Cation:K&Oxidation@(27&16)||HexNAc6Hex6+Cation:K@27	glycopepnew_HCDEThcDiTCIDpeptide_EThcDpd2	79.033	1	23612	33.8	3.9e-09	1	45141.3	HUMAN	Corticosteroid-binding globulin
[3]		P00738	93	1115.19	3	0.41	VVLHPNYSQVDIGLIK	HexNAc3Hex4NeuAc@6	glycopepnew_HCDEThcDiTCIDpeptide_EThcDpd2	39.667	2	10877	29.4	1.1e-09	1	45205.7	HUMAN	Haptoglobin
[3]		P00738	93	933.423	4	5.8	VVLHPNYSQVDIGLIK	HexNAc4Hex4FucNeuAc+Cation:K@6	glycopepnew_HCDEThcDiTCIDpeptide_EThcDpd2	35.233	1	9362	56.5	7.5e-13	1	45205.7	HUMAN	Haptoglobin
[3]		P00738	93	1006.2	4	3.5	VVLHPNYSQVDIGLIK	HexNAc4Hex4FucNeuAc2+Cation:K@6	glycopepnew_HCDEThcDiTCIDpeptide_EThcDpd2	39.65	1	10870	70.7	1.6e-13	1	45205.7	HUMAN	Haptoglobin
[3]		P00738	93	855.154	4	0.95	VVLHPNYSQVDIGLIK	HexNAc4Hex5@6	glycopepnew_HCDEThcDiTCIDpeptide_EThcDpd2	31.3	1	8055	39	7e-11	1	45205.7	HUMAN	Haptoglobin
[3]		P00738	93	1010.44	4	-7.2	VVLHPNYSQVDIGLIK	HexNAc4Hex5Fuc2NeuAc+Cation:K@6	glycopepnew_HCDEThcDiTCIDpeptide_EThcDpd2	40.117	1	11025	19.1	3.7e-06	1	45205.7	HUMAN	Haptoglobin
[3]		P00738	93	927.929	4	1.6	VVLHPNYSQVDIGLIK	HexNAc4Hex5NeuAc@6	glycopepnew_HCDEThcDiTCIDpeptide_EThcDpd2	35.133	2	9336	53.4	1.3e-10	1	45205.7	HUMAN	Haptoglobin
[3]		P00738	93	750.134	5	-1.6	VVLHPNYSQVDIGLIK	HexNAc4Hex5NeuAc+Cation:K@6	glycopepnew_HCDEThcDiTCIDpeptide_EThcDpd2	35.217	1	9355	51	2.2e-18	1	45205.7	HUMAN	Haptoglobin
[3]		P00738	93	1000.7	4	1.3	VVLHPNYSQVDIGLIK	HexNAc4Hex5NeuAc2@6	glycopepnew_HCDEThcDiTCIDpeptide_EThcDpd2	39.583	2	10846	60.7	3.5e-12	1	45205.7	HUMAN	Haptoglobin
[3]		P00738	93	808.352	5	-1.5	VVLHPNYSQVDIGLIK	HexNAc4Hex5NeuAc2+Cation:K@6	glycopepnew_HCDEThcDiTCIDpeptide_EThcDpd2	39.7	1	10885	61.6	1.8e-21	1	45205.7	HUMAN	Haptoglobin
[3]		P00738	93	1024.96	4	0.61	VVLHPNYSQVDIGLIK	HexNAc5Hex5Fuc3+Cation:K@6	glycopepnew_HCDEThcDiTCIDpeptide_EThcDpd2	34.8	2	9219	25.7	5.9e-05	1	45205.7	HUMAN	Haptoglobin
[3]		P00738	93	1092.23	4	-5.1	VVLHPNYSQVDIGLIK	HexNAc5Hex6Fuc2NeuAc@6	glycopepnew_HCDEThcDiTCIDpeptide_EThcDpd2	39.767	1	10907	24.1	5.2e-06	1	45205.7	HUMAN	Haptoglobin
[3]		P00738	93	1201.27	4	-2.7	VVLHPNYSQVDIGLIK	HexNAc5Hex6FucNeuAc3@6	glycopepnew_HCDEThcDiTCIDpeptide_EThcDpd2	44.7	2	12591	33.9	6.1e-08	1	45205.7	HUMAN	Haptoglobin
[3]		P00738	93	1210.76	4	-0.61	VVLHPNYSQVDIGLIK	HexNAc5Hex6FucNeuAc3+Cation:K@6	glycopepnew_HCDEThcDiTCIDpeptide_EThcDpd2	44.883	1	12649	31.7	1.5e-07	1	45205.7	HUMAN	Haptoglobin
[3]		P00738	93	823.161	5	-0.17	VVLHPNYSQVDIGLIK	HexNAc5Hex6NeuAc+Cation:K@6	glycopepnew_HCDEThcDiTCIDpeptide_EThcDpd2	34.867	1	9242	57.6	1.2e-19	1	45205.7	HUMAN	Haptoglobin
[3]		P00738	93	1091.98	4	0.29	VVLHPNYSQVDIGLIK	HexNAc5Hex6NeuAc2@6	glycopepnew_HCDEThcDiTCIDpeptide_EThcDpd2	39.283	1	10736	54.2	6.3e-10	1	45205.7	HUMAN	Haptoglobin
[3]		P00738	93	1101.47	4	-2.2	VVLHPNYSQVDIGLIK	HexNAc5Hex6NeuAc2+Cation:K@6	glycopepnew_HCDEThcDiTCIDpeptide_EThcDpd2	39.333	1	10757	57.2	1.4e-09	1	45205.7	HUMAN	Haptoglobin
[3]		P00738	93	1164.76	4	1.4	VVLHPNYSQVDIGLIK	HexNAc5Hex6NeuAc3@6	glycopepnew_HCDEThcDiTCIDpeptide_EThcDpd2	44.767	3	12611	45.2	6.3e-11	1	45205.7	HUMAN	Haptoglobin
[3]		P00738	93	1174.25	4	-0.78	VVLHPNYSQVDIGLIK	HexNAc5Hex6NeuAc3+Cation:K@6	glycopepnew_HCDEThcDiTCIDpeptide_EThcDpd2	44.767	4	12616	43.6	2.4e-07	1	45205.7	HUMAN	Haptoglobin
[3]		P00738	93	1365.33	4	1.1	VVLHPNYSQVDIGLIK	HexNAc6Hex7FucNeuAc4@6	glycopepnew_HCDEThcDiTCIDpeptide_EThcDpd2	51.833	1	14916	14.4	0.00016	1	45205.7	HUMAN	Haptoglobin
[3]		P00738	93	1256.04	4	1	VVLHPNYSQVDIGLIK	HexNAc6Hex7NeuAc3@6	glycopepnew_HCDEThcDiTCIDpeptide_EThcDpd2	44.617	2	12564	33.4	5.7e-07	1	45205.7	HUMAN	Haptoglobin
[14]		P01019	11	1113	4	1.5	VYIHPFHLVIHNESTCEQLAK	HexNAc4Hex5NeuAc@12	glycopepnew_HCDEThcDiTCIDpeptide_EThcDpd2	26.8	1	6584	45.7	5.2e-17	1	53154.7	HUMAN	Angiotensinogen
[14]		P01019	11	948.82	5	3.8	VYIHPFHLVIHNESTCEQLAK	HexNAc4Hex5NeuAc2@12	glycopepnew_HCDEThcDiTCIDpeptide_EThcDpd2	29.833	2	7554	62.2	4.3e-19	1	53154.7	HUMAN	Angiotensinogen
[35]		P02749	2	965.138	4	-2.6	VYKPSAGNNSLYR	HexNAc2Hex12+Cation:K@8||HexNAc4Hex5FucNeuAc2+Cation:K@8	glycopepnew_HCDEThcDiTCIDpeptide_EThcDpd2	21.717	2	4915	43.1	6.2e-18	1	38298.6	HUMAN	Beta-2-glycoprotein 1
[35]		P02749	2	955.653	4	1.4	VYKPSAGNNSLYR	HexNAc4Hex5FucNeuAc2@8	glycopepnew_HCDEThcDiTCIDpeptide_EThcDpd2	21.717	1	4913	39.3	1.4e-14	1	38298.6	HUMAN	Beta-2-glycoprotein 1
[3]		P00738	93	1163.28	4	-4.2	WQAKMVSHHNLTTGATLINEQWLLTTAK	HexNAc3Hex4Fuc+Cation:K&Oxidation@(10&(1|5))||HexNAc3Hex5+Cation:K@10	glycopepnew_HCDEThcDiTCIDpeptide_EThcDpd2	31.75	2	8200	57.2	1.2e-16	1	45205.7	HUMAN	Haptoglobin
[3]		P00738	93	1272.82	4	-0.052	WQAKMVSHHNLTTGATLINEQWLLTTAK	Oxidation@1=41;Oxidation@5=48;HexNAc5Hex5+Cation:K@10	glycopepnew_HCDEThcDiTCIDpeptide_EThcDpd2	34.833	1	9232	24.5	9.8e-09	1	45205.7	HUMAN	Haptoglobin
[3]		P00738	93	1386.11	4	-2.3	WQAKMVSHHNLTTGATLINEQWLLTTAK	Oxidation@1=57;Oxidation@5=57;HexNAc5Hex6NeuAc+Cation:K@10	glycopepnew_HCDEThcDiTCIDpeptide_EThcDpd2	49.633	1	14207	26	1.9e-08	1	45205.7	HUMAN	Haptoglobin
[49]		decoy	1	988.752	6	7.2	YAALDPMGAHTTDMFSAMTLTNVSEGSVHMTAS	Oxidation@7=24;HexNAc6Hex5Fuc3@22=24	glycopepnew_HCDEThcDiTCIDpeptide_EThcDpd2	27.367	1	6765	16.3	2e-07	1	46324.9	HUMAN	Thyroxine-binding globulin
[20]		P43652	8	1084.67	4	0.77	YAEDKFNETTEK	HexNAc5Hex6NeuAc3@7	glycopepnew_HCDEThcDiTCIDpeptide_EThcDpd2	24.033	2	5682	38.5	1.4e-10	1	69069.8	HUMAN	Afamin
[12]		P01871	14	759.043	4	-7.7	YKNNSDISSTR	HexNAc3Hex5NeuAc+Cation:K@3	glycopepnew_HCDEThcDiTCIDpeptide_EThcDpd2	23.167	1	5386	12.2	4.7e-05	1	49440.2	HUMAN	Immunoglobulin heavy constant mu
[12]		P01871	14	677.266	5	-2.6	YKNNSDISSTR	HexNAc4Hex5FucNeuAc+Cation:K@3	glycopepnew_HCDEThcDiTCIDpeptide_EThcDpd2	14.533	2	2395	48	9.1e-18	1	49440.2	HUMAN	Immunoglobulin heavy constant mu
[12]		P01871	14	717.881	5	-2.7	YKNNSDISSTR	HexNAc5Hex5FucNeuAc+Cation:K@3	glycopepnew_HCDEThcDiTCIDpeptide_EThcDpd2	14.6	1	2418	56.8	7.5e-25	1	49440.2	HUMAN	Immunoglobulin heavy constant mu
[1]		P01009	129	1102.49	3	-4.2	YLGNATAIFFLPDEGK	HexNAc3Hex4Fuc2@4	glycopepnew_HCDEThcDiTCIDpeptide_EThcDpd2	55.283	1	16036	28.6	2.9e-10	1	46736.9	HUMAN	Alpha-1-antitrypsin
[1]		P01009	129	1102.15	3	-0.15	YLGNATAIFFLPDEGK	HexNAc3Hex4NeuAc@4	glycopepnew_HCDEThcDiTCIDpeptide_EThcDpd2	55.333	1	16054	37.8	5e-14	1	46736.9	HUMAN	Alpha-1-antitrypsin
[1]		P01009	129	996.419	4	6.1	YLGNATAIFFLPDEGK	HexNAc4Hex4FucNeuAc2+Cation:K@4	glycopepnew_HCDEThcDiTCIDpeptide_EThcDpd2	55.317	2	16046	66.6	5.4e-21	1	46736.9	HUMAN	Alpha-1-antitrypsin
[1]		P01009	129	927.89	4	-2.6	YLGNATAIFFLPDEGK	HexNAc4Hex5Fuc2+Cation:K@4	glycopepnew_HCDEThcDiTCIDpeptide_EThcDpd2	55.5	1	16099	34.8	2.6e-11	1	46736.9	HUMAN	Alpha-1-antitrypsin
[1]		P01009	129	1000.66	4	-7.1	YLGNATAIFFLPDEGK	HexNAc4Hex5Fuc2NeuAc+Cation:K@4	glycopepnew_HCDEThcDiTCIDpeptide_EThcDpd2	54.6	2	15816	14.5	2.6e-07	1	46736.9	HUMAN	Alpha-1-antitrypsin
[1]		P01009	129	1027.44	4	1.1	YLGNATAIFFLPDEGK	HexNAc4Hex5FucNeuAc2@4	glycopepnew_HCDEThcDiTCIDpeptide_EThcDpd2	55.7	2	16160	24.4	5e-10	1	46736.9	HUMAN	Alpha-1-antitrypsin
[1]		P01009	129	918.146	4	-2.8	YLGNATAIFFLPDEGK	HexNAc4Hex5NeuAc@4	glycopepnew_HCDEThcDiTCIDpeptide_EThcDpd2	47.65	2	13565	51.3	2.2e-15	1	46736.9	HUMAN	Alpha-1-antitrypsin
[1]		P01009	129	927.637	4	-0.76	YLGNATAIFFLPDEGK	HexNAc4Hex5NeuAc+Cation:K@4	glycopepnew_HCDEThcDiTCIDpeptide_EThcDpd2	47.667	1	13571	68.7	1.9e-22	1	46736.9	HUMAN	Alpha-1-antitrypsin
[1]		P01009	129	990.924	4	1.4	YLGNATAIFFLPDEGK	HexNAc4Hex5NeuAc2@4	glycopepnew_HCDEThcDiTCIDpeptide_EThcDpd2	55.317	1	16044	60.5	6.2e-19	1	46736.9	HUMAN	Alpha-1-antitrypsin
[1]		P01009	129	1000.41	4	-0.51	YLGNATAIFFLPDEGK	HexNAc4Hex5NeuAc2+Cation:K@4	glycopepnew_HCDEThcDiTCIDpeptide_EThcDpd2	56.883	2	16545	70.5	1.6e-25	1	46736.9	HUMAN	Alpha-1-antitrypsin
[1]		P01009	129	1091.7	4	1.2	YLGNATAIFFLPDEGK	HexNAc5Hex6NeuAc2+Cation:K@4	glycopepnew_HCDEThcDiTCIDpeptide_EThcDpd2	55.083	2	15972	30.2	2.9e-09	1	46736.9	HUMAN	Alpha-1-antitrypsin
[1]		P01009	129	1164.47	4	-2.1	YLGNATAIFFLPDEGK	HexNAc5Hex6NeuAc3+Cation:K@4	glycopepnew_HCDEThcDiTCIDpeptide_EThcDpd2	66.05	1	19464	49.5	1e-17	1	46736.9	HUMAN	Alpha-1-antitrypsin
[5]		P01023	66	1166.74	4	-7.4	YLNETVTVSASLESVR	HexNAc5Hex8Fuc4@3	glycopepnew_HCDEThcDiTCIDpeptide_EThcDpd2	69.167	1	20452	20.5	1.8e-06	1	163292	HUMAN	Alpha-2-macroglobulin
[15]		P00734	10	988.41	5	5	YPHKPEINSTTHPGADLQENFCR	HexNAc4Hex4FucNeuAc2+Cation:K@8	glycopepnew_HCDEThcDiTCIDpeptide_EThcDpd2	24.95	1	5988	44.2	4.9e-15	1	70037.5	HUMAN	Prothrombin
[15]		P00734	10	955.209	5	-0.67	YPHKPEINSTTHPGADLQENFCR	HexNAc4Hex5Fuc3@8	glycopepnew_HCDEThcDiTCIDpeptide_EThcDpd2	22.433	1	5147	30.8	1.7e-10	1	70037.5	HUMAN	Prothrombin
[15]		P00734	10	1013.43	5	1.2	YPHKPEINSTTHPGADLQENFCR	HexNAc4Hex5Fuc3NeuAc@8||HexNAc9Hex3+Cation:K@8	glycopepnew_HCDEThcDiTCIDpeptide_EThcDpd2	24.967	1	5992	14.6	5.4e-05	1	70037.5	HUMAN	Prothrombin
[15]		P00734	10	925.795	5	1.3	YPHKPEINSTTHPGADLQENFCR	HexNAc4Hex5NeuAc@8	glycopepnew_HCDEThcDiTCIDpeptide_EThcDpd2	22.6	1	5201	75.2	1.4e-21	1	70037.5	HUMAN	Prothrombin
[15]		P00734	10	991.602	5	-2.3	YPHKPEINSTTHPGADLQENFCR	HexNAc4Hex5NeuAc2+Cation:K@8	glycopepnew_HCDEThcDiTCIDpeptide_EThcDpd2	24.95	2	5990	70	5.4e-32	1	70037.5	HUMAN	Prothrombin
[17]		P01011	12	1318.28	4	-2	YTGNASALFILPDQDK	HexNAc6Hex7NeuAc4@4	glycopepnew_HCDEThcDiTCIDpeptide_EThcDpd2	78.5	1	23447	18.7	5.9e-08	1	47651.3	HUMAN	Alpha-1-antichymotrypsin
[17]		P01011	12	1327.77	4	-1.2	YTGNASALFILPDQDK	HexNAc6Hex7NeuAc4+Cation:K@4	glycopepnew_HCDEThcDiTCIDpeptide_EThcDpd2	79.2	1	23667	21.6	3.1e-08	1	47651.3	HUMAN	Alpha-1-antichymotrypsin

## Sheet: DBSearch_incmi
	Uniq Pep	Acc #	Num Unique	m/z	z	ppm	DB Peptide	Variable Mods	Fraction	RT	Spectrum	MSMS Info	Score	Expect	# in DB	Protein MW	Species	Protein Name
[19]		P02765	10	1148.98	4	4.8	AALAAFNAQNNGSNFQLEEISR	Incorrect Mono 1Da@Neutral loss;HexNAc4Hex4FucNeuAc2+Cation:K@11	glycopepnew_HCDEThcDiTCIDpeptide_EThcDpd2	45	2	12689	50.9	5e-16	1	39325	HUMAN	Alpha-2-HS-glycoprotein
[19]		P02765	10	1153.22	4	-6.1	AALAAFNAQNNGSNFQLEEISR	Incorrect Mono 1Da@Neutral loss;HexNAc4Hex5Fuc2NeuAc+Cation:K@11	glycopepnew_HCDEThcDiTCIDpeptide_EThcDpd2	45.267	1	12778	27.2	1.8e-07	1	39325	HUMAN	Alpha-2-HS-glycoprotein
[19]		P02765	10	1307.54	4	-1.8	AALAAFNAQNNGSNFQLEEISR	Incorrect Mono 1Da@Neutral loss;HexNAc5Hex6NeuAc3@11||HexNAc6Hex9Fuc+Cation:K@11	glycopepnew_HCDEThcDiTCIDpeptide_EThcDpd2	51.667	1	14871	26.7	1.4e-07	1	39325	HUMAN	Alpha-2-HS-glycoprotein
[1]		P01009	159	1360.55	4	7.1	ADTHDEILEGLNFNL	Incorrect Mono 1Da@Neutral loss;HexNAc7Hex8FucNeuAc3@14	glycopepnew_HCDEThcDiTCIDpeptide_EThcDpd2	62.45	1	18328	27.1	1.1e-07	1	46736.9	HUMAN	Alpha-1-antitrypsin
[1]		P01009	159	1134.73	4	-2.2	ADTHDEILEGLNFNLTEIP	Incorrect Mono 1Da@Neutral loss;HexNAc7Hex6@14	glycopepnew_HCDEThcDiTCIDpeptide_EThcDpd2	62.333	1	18295	20.8	9.6e-09	1	46736.9	HUMAN	Alpha-1-antitrypsin
[1]		P01009	159	1396.09	4	-0.79	ADTHDEILEGLNFNLTEIPEAQIH	Incorrect Mono 1Da@Neutral loss;HexNAc5Hex6NeuAc3@14||HexNAc6Hex9Fuc+Cation:K@14	glycopepnew_HCDEThcDiTCIDpeptide_EThcDpd2	62.933	1	18474	16.9	5.6e-07	1	46736.9	HUMAN	Alpha-1-antitrypsin
[1]		P01009	159	1134.49	4	-2.8	ADTHDEILEGLNFNLTEIPEAQIHEG	Incorrect Mono 1Da@Neutral loss;HexNAc4Hex3Fuc2+Cation:K@14	glycopepnew_HCDEThcDiTCIDpeptide_EThcDpd2	53.383	1	15427	21.1	1.5e-06	1	46736.9	HUMAN	Alpha-1-antitrypsin
[1]		P01009	159	1195.7	5	-3.7	ADTHDEILEGLNFNLTEIPEAQIHEGF	Incorrect Mono 1Da@Neutral loss;HexNAc8Hex8@14	glycopepnew_HCDEThcDiTCIDpeptide_EThcDpd2	57.9	2	16858	21.4	4.2e-08	1	46736.9	HUMAN	Alpha-1-antitrypsin
[1]		P01009	159	1055.12	6	4.7	ADTHDEILEGLNFNLTEIPEAQIHEGFQEL	Incorrect Mono 1Da@Neutral loss;HexNAc7Hex8Fuc+Cation:K@14	glycopepnew_HCDEThcDiTCIDpeptide_EThcDpd2	57.7	1	16794	13.6	3.8e-05	1	46736.9	HUMAN	Alpha-1-antitrypsin
[1]		P01009	159	1165.1	5	-1.7	ADTHDEILEGLNFNLTEIPEAQIHEGFQELL	Incorrect Mono 1Da@Neutral loss;HexNAc5Hex4Fuc2NeuAc+Cation:K@14	glycopepnew_HCDEThcDiTCIDpeptide_EThcDpd2	55.667	2	16147	16	0.0001	1	46736.9	HUMAN	Alpha-1-antitrypsin
[1]		P01009	159	1340.78	5	-4.3	ADTHDEILEGLNFNLTEIPEAQIHEGFQELLR	Incorrect Mono 1Da@Neutral loss;HexNAc5Hex6FucNeuAc3@14	glycopepnew_HCDEThcDiTCIDpeptide_EThcDpd2	63.317	1	18596	37.4	6.8e-13	1	46736.9	HUMAN	Alpha-1-antitrypsin
[1]		P01009	159	1348.37	5	-2.2	ADTHDEILEGLNFNLTEIPEAQIHEGFQELLR	Incorrect Mono 1Da@Neutral loss;HexNAc5Hex6FucNeuAc3+Cation:K@14	glycopepnew_HCDEThcDiTCIDpeptide_EThcDpd2	62.283	2	18279	62	7.8e-22	1	46736.9	HUMAN	Alpha-1-antitrypsin
[1]		P01009	159	1311.57	5	0.2	ADTHDEILEGLNFNLTEIPEAQIHEGFQELLR	Incorrect Mono 1Da@Neutral loss;HexNAc5Hex6NeuAc3@14||HexNAc6Hex9Fuc+Cation:K@14	glycopepnew_HCDEThcDiTCIDpeptide_EThcDpd2	66.2	2	19516	45	1.1e-14	1	46736.9	HUMAN	Alpha-1-antitrypsin
[1]		P01009	159	1319.15	5	-5.9	ADTHDEILEGLNFNLTEIPEAQIHEGFQELLR	Incorrect Mono 1Da@Neutral loss;HexNAc5Hex6NeuAc3+Cation:K@14	glycopepnew_HCDEThcDiTCIDpeptide_EThcDpd2	64.25	1	18886	47.6	3.9e-18	1	46736.9	HUMAN	Alpha-1-antitrypsin
[1]		P01009	159	1226.86	6	-0.63	ADTHDEILEGLNFNLTEIPEAQIHEGFQELLR	Incorrect Mono 1Da@Neutral loss;HexNAc6Hex7FucNeuAc4@14	glycopepnew_HCDEThcDiTCIDpeptide_EThcDpd2	69.133	1	20441	26.8	3.7e-09	1	46736.9	HUMAN	Alpha-1-antitrypsin
[1]		P01009	159	1384.6	5	1	ADTHDEILEGLNFNLTEIPEAQIHEGFQELLR	Incorrect Mono 1Da@Neutral loss;HexNAc6Hex7NeuAc3@14	glycopepnew_HCDEThcDiTCIDpeptide_EThcDpd2	62.833	1	18447	36.4	1.2e-12	1	46736.9	HUMAN	Alpha-1-antitrypsin
[1]		P01009	159	1308.17	5	5	ADTHDEILEGLNFNLTEIPEAQIHEGFQELLR	Incorrect Mono 1Da@Neutral loss;HexNAc6Hex8NeuAc+Cation:K@14	glycopepnew_HCDEThcDiTCIDpeptide_EThcDpd2	58.2	1	16959	34.8	2.3e-11	1	46736.9	HUMAN	Alpha-1-antitrypsin
[1]		P01009	159	1369.79	5	7.4	ADTHDEILEGLNFNLTEIPEAQIHEGFQELLR	Incorrect Mono 1Da@Neutral loss;HexNAc6Hex9FucNeuAc+Cation:K@14	glycopepnew_HCDEThcDiTCIDpeptide_EThcDpd2	62.733	1	18417	38.6	1.8e-14	1	46736.9	HUMAN	Alpha-1-antitrypsin
[1]		P01009	159	1287.36	5	1.5	ADTHDEILEGLNFNLTEIPEAQIHEGFQELLR	Incorrect Mono 1Da@Neutral loss;HexNAc7Hex7Fuc+Cation:K@14	glycopepnew_HCDEThcDiTCIDpeptide_EThcDpd2	57.533	1	16742	46.4	6.7e-15	1	46736.9	HUMAN	Alpha-1-antitrypsin
[1]		P01009	159	1312.17	5	-4.5	ADTHDEILEGLNFNLTEIPEAQIHEGFQELLR	Incorrect Mono 1Da@Neutral loss;HexNAc7Hex8Fuc@14	glycopepnew_HCDEThcDiTCIDpeptide_EThcDpd2	66.733	1	19673	44.2	1.1e-12	1	46736.9	HUMAN	Alpha-1-antitrypsin
[1]		P01009	159	1341.18	5	-6.4	ADTHDEILEGLNFNLTEIPEAQIHEGFQELLR	Incorrect Mono 1Da@Neutral loss;HexNAc7Hex8NeuAc@14	glycopepnew_HCDEThcDiTCIDpeptide_EThcDpd2	57.367	2	16697	38.4	1.1e-13	1	46736.9	HUMAN	Alpha-1-antitrypsin
[1]		P01009	159	1348.77	5	-2.7	ADTHDEILEGLNFNLTEIPEAQIHEGFQELLR	Incorrect Mono 1Da@Neutral loss;HexNAc7Hex8NeuAc+Cation:K@14	glycopepnew_HCDEThcDiTCIDpeptide_EThcDpd2	63.85	1	18765	42.6	1.4e-16	1	46736.9	HUMAN	Alpha-1-antitrypsin
[1]		P01009	159	1385.2	5	-2.5	ADTHDEILEGLNFNLTEIPEAQIHEGFQELLR	Incorrect Mono 1Da@Neutral loss;HexNAc8Hex9Fuc@14	glycopepnew_HCDEThcDiTCIDpeptide_EThcDpd2	63	2	18497	29.6	1.1e-09	1	46736.9	HUMAN	Alpha-1-antitrypsin
[1]		P01009	159	1187.92	5	-0.46	ADTHDEILEGLNFNLTEIPEAQIHEGFQELLR	Incorrect Mono 1Da@Neutral loss=12;HexNAc4Hex5NeuAc2+Cation:K@14=12	glycopepnew_HCDEThcDiTCIDpeptide_EThcDpd2	58.95	1	17200	58.4	3.9e-19	1	46736.9	HUMAN	Alpha-1-antitrypsin
[1]		P01009	159	1282.56	5	-0.52	ADTHDEILEGLNFNLTEIPEAQIHEGFQELLR	Incorrect Mono 1Da@Neutral loss=8;HexNAc5Hex6FucNeuAc2@14=8	glycopepnew_HCDEThcDiTCIDpeptide_EThcDpd2	57.8	1	16823	30.8	9.1e-12	1	46736.9	HUMAN	Alpha-1-antitrypsin
[1]		P01009	159	1093.31	6	-4.9	ADTHDEILEGLNFNLTEIPEAQIHEGFQELLRTLNQ	Incorrect Mono 1Da@Neutral loss;HexNAc4Hex6Fuc2NeuAc+Cation:K@14	glycopepnew_HCDEThcDiTCIDpeptide_EThcDpd2	62.267	1	18275	21.4	5e-07	1	46736.9	HUMAN	Alpha-1-antitrypsin
[1]		P01009	159	1303.37	5	2.1	ADTHDEILEGLNFNLTEIPEAQIHEGFQELLRTLNQPDS	Incorrect Mono 1Da@Neutral loss;HexNAc2Hex10+Cation:K@14	glycopepnew_HCDEThcDiTCIDpeptide_EThcDpd2	57.05	1	16593	11.8	6.5e-06	1	46736.9	HUMAN	Alpha-1-antitrypsin
[1]		P01009	159	1299.74	7	3.1	ADTHDEILEGLNFNLTEIPEAQIHEGFQELLRTLNQPDSQLQLTTGNGLFLSEGLK	Incorrect Mono 1Da@Neutral loss;HexNAc6Hex8NeuAc+Cation:K@14	glycopepnew_HCDEThcDiTCIDpeptide_EThcDpd2	68.167	1	20127	30	1.4e-10	1	46736.9	HUMAN	Alpha-1-antitrypsin
[9]		P00450	29	1126.2	4	0.11	AGLQAFFQVQECNK	Incorrect Mono 1Da@Neutral loss;HexNAc5Hex6NeuAc3@13||HexNAc6Hex9Fuc+Cation:K@13	glycopepnew_HCDEThcDiTCIDpeptide_EThcDpd2	55.733	2	16173	24	7.1e-09	1	122206	HUMAN	Ceruloplasmin
[9]		P00450	29	971.633	4	-2.8	AGLQAFFQVQECNK	Incorrect Mono 1Da@Neutral loss=26;HexNAc4Hex5NeuAc2+Cation:K@13=26	glycopepnew_HCDEThcDiTCIDpeptide_EThcDpd2	47.4	1	13475	20.5	1.5e-05	1	122206	HUMAN	Ceruloplasmin
[16]		P04217	15	1389.64	5	-2.3	AIFYETQPSLWAESESLLKPLANVTLTCQAHLETPDFQLFK	Incorrect Mono 1Da@Neutral loss;HexNAc4Hex5Fuc4@23||HexNAc6Hex6&Oxidation@(23&11)	glycopepnew_HCDEThcDiTCIDpeptide_EThcDpd2	59.917	1	17497	11.8	1.5e-05	1	54254	HUMAN	Alpha-1B-glycoprotein
[16]		P04217	15	1389.44	5	-2.8	AIFYETQPSLWAESESLLKPLANVTLTCQAHLETPDFQLFK	Incorrect Mono 1Da@Neutral loss=9;HexNAc4Hex5Fuc2NeuAc@23=9	glycopepnew_HCDEThcDiTCIDpeptide_EThcDpd2	59.617	1	17399	41.6	5.8e-12	1	54254	HUMAN	Alpha-1B-glycoprotein
[7]		P02790	44	1077.45	4	0.72	ALPQPQNVTSLLGCTH	Incorrect Mono 1Da@Neutral loss=36;HexNAc5Hex6NeuAc2@7=36	glycopepnew_HCDEThcDiTCIDpeptide_EThcDpd2	46.5	2	13190	19.6	2e-07	1	51676.8	HUMAN	Hemopexin
[32]		P19827	4	1259.8	4	-0.59	ANLSSQALQMSLDYGFVTPLTSMSIR	Incorrect Mono 1Da@Neutral loss=36;HexNAc4Hex5NeuAc2@2=36	glycopepnew_HCDEThcDiTCIDpeptide_EThcDpd2	62.55	1	18362	43.5	1.9e-09	1	101390	HUMAN	Inter-alpha-trypsin inhibitor heavy chain H1
[12]		P08185	24	1329.87	4	-6.9	AVLQLNEEGVDTAGSTGVTLNLTSKPIILR	Incorrect Mono 1Da@Neutral loss;HexNAc4Hex5Fuc2NeuAc@21	glycopepnew_HCDEThcDiTCIDpeptide_EThcDpd2	47.6	2	13549	30.9	3.5e-05	1	45141.3	HUMAN	Corticosteroid-binding globulin
[6]		P02763	91	1193.28	4	0.79	CANLVPVPITNATLDQITGK	Incorrect Mono 1Da@Neutral loss;HexNAc6Hex7NeuAc@11	glycopepnew_HCDEThcDiTCIDpeptide_EThcDpd2	48.683	1	13896	16.8	6.6e-05	1	23511.8	HUMAN	Alpha-1-acid glycoprotein 1
[6-1]	30	P19652	74	1191.75	4	-7.6	CANLVPVPITNATLDR	Incorrect Mono 1Da@Neutral loss;HexNAc7Hex8NeuAc@11	glycopepnew_HCDEThcDiTCIDpeptide_EThcDpd2	53.65	2	15507	21.5	1.3e-05	1	23602.8	HUMAN	Alpha-1-acid glycoprotein 2
[5]		P02787	86	921.392	4	4.9	CGLVPVLAENYNK	Incorrect Mono 1Da@Neutral loss=34;HexNAc4Hex5NeuAc2@12=34	glycopepnew_HCDEThcDiTCIDpeptide_EThcDpd2	44.117	1	12401	28.2	4.3e-09	1	77064.7	HUMAN	Serotransferrin
[5]		P02787	86	1012.67	4	-1.1	CGLVPVLAENYNK	Incorrect Mono 1Da@Neutral loss=49;HexNAc5Hex6NeuAc2@12=49	glycopepnew_HCDEThcDiTCIDpeptide_EThcDpd2	42.533	1	11861	32.6	5.5e-12	1	77064.7	HUMAN	Serotransferrin
[5]		P02787	86	1090.94	4	-2.4	CGLVPVLAENYNKS	Incorrect Mono 1Da@Neutral loss=25;HexNAc6Hex5Fuc3NeuAc+Cation:K@12=25	glycopepnew_HCDEThcDiTCIDpeptide_EThcDpd2	52.067	2	14993	30.4	5.3e-11	1	77064.7	HUMAN	Serotransferrin
[5]		P02787	86	955.422	3	1.7	CGLVPVLAENYNKSD	Incorrect Mono 1Da@Neutral loss;HexNAc2Hex3Fuc2@12	glycopepnew_HCDEThcDiTCIDpeptide_EThcDpd2	43.233	1	12106	27.4	2.1e-10	1	77064.7	HUMAN	Serotransferrin
[5]		P02787	86	931.118	4	-7.4	CGLVPVLAENYNKSDN	Incorrect Mono 1Da@Neutral loss;HexNAc3Hex7Fuc+Cation:K@12	glycopepnew_HCDEThcDiTCIDpeptide_EThcDpd2	45.717	1	12928	16.3	6.3e-06	1	77064.7	HUMAN	Serotransferrin
[5]		P02787	86	1246.33	5	3	CGLVPVLAENYNKSDNCEDTPEAGYFAIAVVK	Incorrect Mono 1Da@Neutral loss;HexNAc6Hex7Fuc2+Cation:K@12	glycopepnew_HCDEThcDiTCIDpeptide_EThcDpd2	43.183	1	12085	19	2.1e-07	1	77064.7	HUMAN	Serotransferrin
[7]		P02790	44	997.159	5	-0.76	CSDGWSFDATTLDDNGT	Incorrect Mono 1Da@Neutral loss;HexNAc6Hex7FucNeuAc2+Cation:K@15	glycopepnew_HCDEThcDiTCIDpeptide_EThcDpd2	61.75	1	18104	13	0.00013	1	51676.8	HUMAN	Hemopexin
[7]		P02790	44	1204.45	4	0.2	CSDGWSFDATTLDDNGT	Incorrect Mono 1Da@Neutral loss=56;HexNAc6Hex8FucNeuAc@15=56	glycopepnew_HCDEThcDiTCIDpeptide_EThcDpd2	58.983	2	17209	22	1.3e-08	1	51676.8	HUMAN	Hemopexin
[7]		P02790	44	1198.72	4	-3.7	CSDGWSFDATTLDDNGTMLFFK	Incorrect Mono 1Da@Neutral loss;HexNAc5Hex4Fuc2NeuAc&Oxidation@(15&18)||HexNAc5Hex5FucNeuAc@15	glycopepnew_HCDEThcDiTCIDpeptide_EThcDpd2	50.133	1	14359	21.3	8.7e-08	1	51676.8	HUMAN	Hemopexin
[7]		P02790	44	1384.79	4	-2.5	CSDGWSFDATTLDDNGTMLFFK	Incorrect Mono 1Da@Neutral loss;HexNAc5Hex6FucNeuAc3@15	glycopepnew_HCDEThcDiTCIDpeptide_EThcDpd2	73.133	2	21739	17.9	0.00016	1	51676.8	HUMAN	Hemopexin
[7]		P02790	44	1348.27	4	2.2	CSDGWSFDATTLDDNGTMLFFK	Incorrect Mono 1Da@Neutral loss;HexNAc5Hex6NeuAc3@15||HexNAc6Hex9Fuc+Cation:K@15	glycopepnew_HCDEThcDiTCIDpeptide_EThcDpd2	73.433	1	21832	29	4.1e-10	1	51676.8	HUMAN	Hemopexin
[7]		P02790	44	1197.7	4	-1.7	CSDGWSFDATTLDDNGTMLFFK	Incorrect Mono 1Da@Neutral loss=41;HexNAc4Hex5NeuAc2+Cation:K@15=41;Oxidation@18=64	glycopepnew_HCDEThcDiTCIDpeptide_EThcDpd2	58.183	2	16953	44.7	1.6e-15	1	51676.8	HUMAN	Hemopexin
[7]		P02790	44	1185.96	4	2.3	CSDGWSFDATTLDDNGTMLFFK	Incorrect Mono 1Da@Neutral loss=44;Pyro-carbamidomethyl@1=44;HexNAc6Hex6+Cation:K@15=44	glycopepnew_HCDEThcDiTCIDpeptide_EThcDpd2	80.483	2	24051	19	1.7e-08	1	51676.8	HUMAN	Hemopexin
[42]		P43251	2	1323.07	4	-5.9	DEATKWNVNAPPTFHSEMMYDNFTLVPVWGK	Incorrect Mono 1Da@Neutral loss;HexNAc5Hex3Fuc&Oxidation@(22&(18|19))||HexNAc5Hex4@22	glycopepnew_HCDEThcDiTCIDpeptide_EThcDpd2	53.817	1	15562	22.6	1.9e-06	1	61133.5	HUMAN	Biotinidase
[32]		P19827	4	1076.47	5	0.12	DKICDLLVANNHFAHFFAPQNLTNMNK	Incorrect Mono 1Da@Neutral loss=32;HexNAc4Hex5NeuAc2@21=32	glycopepnew_HCDEThcDiTCIDpeptide_EThcDpd2	44.65	1	12574	44	3e-14	1	101390	HUMAN	Inter-alpha-trypsin inhibitor heavy chain H1
[1]		P01009	159	1341.39	5	3.3	DTHDEILEGLNFNLTEIPEAQIHEGFQELLR	Incorrect Mono 1Da@Neutral loss;HexNAc6Hex7FucNeuAc2@13	glycopepnew_HCDEThcDiTCIDpeptide_EThcDpd2	67.117	1	19802	13	1.2e-05	1	46736.9	HUMAN	Alpha-1-antitrypsin
[10-1]	19	P01859	24	742.034	4	-2.3	EEQFNSTFR	Incorrect Mono 1Da@Neutral loss;HexNAc4Hex5Fuc+Cation:K@5	glycopepnew_HCDEThcDiTCIDpeptide_EThcDpd2	19.133	2	4015	23.7	9.5e-06	1	35901	HUMAN	Immunoglobulin heavy constant gamma 2
[10-1]	19	P01859	24	782.548	4	-1.8	EEQFNSTFR	Incorrect Mono 1Da@Neutral loss;HexNAc4Hex6Fuc+Cation:K@5	glycopepnew_HCDEThcDiTCIDpeptide_EThcDpd2	19.583	1	4173	25.3	1.2e-09	1	35901	HUMAN	Immunoglobulin heavy constant gamma 2
[10]		P01857	29	987.057	3	0.1	EEQYNSTYR	Incorrect Mono 1Da@Neutral loss;HexNAc4Hex5Fuc@5	glycopepnew_HCDEThcDiTCIDpeptide_EThcDpd2	17.067	2	3302	10.2	2.3e-05	1	36106.2	HUMAN	Immunoglobulin heavy constant gamma 1
[10]		P01857	29	878.597	4	-1.8	EEQYNSTYR	Incorrect Mono 1Da@Neutral loss;HexNAc6Hex5Fuc2@5	glycopepnew_HCDEThcDiTCIDpeptide_EThcDpd2	15.983	3	2903	12.8	6.1e-05	1	36106.2	HUMAN	Immunoglobulin heavy constant gamma 1
[16]		P04217	15	1340.54	5	-1.1	EGDHEFLEVPEAQEDVEATFPVHQPGNYSCSYR	Incorrect Mono 1Da@Neutral loss;HexNAc5Hex6NeuAc3@27||HexNAc6Hex9Fuc+Cation:K@27	glycopepnew_HCDEThcDiTCIDpeptide_EThcDpd2	45.7	1	12920	10.6	0.00013	1	54254	HUMAN	Alpha-1B-glycoprotein
[9]		P00450	29	1225.98	4	1.4	EHEGAIYPDNTTDFQR	Incorrect Mono 1Da@Neutral loss;HexNAc5Hex6FucNeuAc3@10	glycopepnew_HCDEThcDiTCIDpeptide_EThcDpd2	33.8	2	8888	25.2	5.2e-07	1	122206	HUMAN	Ceruloplasmin
[9]		P00450	29	988.575	5	-2	EHEGAIYPDNTTDFQR	Incorrect Mono 1Da@Neutral loss;HexNAc5Hex6FucNeuAc3+Cation:K@10	glycopepnew_HCDEThcDiTCIDpeptide_EThcDpd2	33.55	1	8799	47.6	1.2e-10	1	122206	HUMAN	Ceruloplasmin
[9]		P00450	29	959.365	5	-0.59	EHEGAIYPDNTTDFQR	Incorrect Mono 1Da@Neutral loss;HexNAc5Hex6NeuAc3+Cation:K@10	glycopepnew_HCDEThcDiTCIDpeptide_EThcDpd2	33.483	1	8778	53.8	1.1e-15	1	122206	HUMAN	Ceruloplasmin
[9]		P00450	29	1272.48	4	-5.3	EHEGAIYPDNTTDFQR	Incorrect Mono 1Da@Neutral loss;HexNAc7Hex8FucNeuAc+Cation:K@10	glycopepnew_HCDEThcDiTCIDpeptide_EThcDpd2	33.35	1	8728	15.8	7.7e-05	1	122206	HUMAN	Ceruloplasmin
[9]		P00450	29	1034.9	4	-0.76	EHEGAIYPDNTTDFQR	Incorrect Mono 1Da@Neutral loss=10;HexNAc4Hex5NeuAc2+Cation:K@10=10	glycopepnew_HCDEThcDiTCIDpeptide_EThcDpd2	30.1	1	7639	13.5	0.0001	1	122206	HUMAN	Ceruloplasmin
[9]		P00450	29	1014.41	5	-2.3	ELHHLQEQNVSNAFLDK	Incorrect Mono 1Da@Neutral loss;HexNAc5Hex6FucNeuAc3+Cation:K@9	glycopepnew_HCDEThcDiTCIDpeptide_EThcDpd2	31.8	1	8215	49.2	4.8e-12	1	122206	HUMAN	Ceruloplasmin
[9]		P00450	29	985.198	5	-0.85	ELHHLQEQNVSNAFLDK	Incorrect Mono 1Da@Neutral loss;HexNAc5Hex6NeuAc3+Cation:K@9	glycopepnew_HCDEThcDiTCIDpeptide_EThcDpd2	32.15	1	8336	62.8	8.4e-17	1	122206	HUMAN	Ceruloplasmin
[6]		P02763	91	910.354	4	0.5	ENGTISR	Incorrect Mono 1Da@Neutral loss;HexNAc5Hex6NeuAc3@2	glycopepnew_HCDEThcDiTCIDpeptide_EThcDpd2	21.567	1	4871	16.9	0.00012	1	23511.8	HUMAN	Alpha-1-acid glycoprotein 1
[6-1]	30	P19652	74	952.851	4	-2.8	ENGTVSR	Incorrect Mono 1Da@Neutral loss;HexNAc5Hex6FucNeuAc3+Cation:K@2	glycopepnew_HCDEThcDiTCIDpeptide_EThcDpd2	18.483	1	3792	26.6	2.7e-08	1	23602.8	HUMAN	Alpha-1-acid glycoprotein 2
[6-1]	30	P19652	74	916.338	4	-0.52	ENGTVSR	Incorrect Mono 1Da@Neutral loss;HexNAc5Hex6NeuAc3+Cation:K@2	glycopepnew_HCDEThcDiTCIDpeptide_EThcDpd2	18.333	2	3738	18.1	4.2e-07	1	23602.8	HUMAN	Alpha-1-acid glycoprotein 2
[9]		P00450	29	1093.44	4	0.57	ENLTAPGSDSAVFFEQGTTR	Incorrect Mono 1Da@Neutral loss=53;HexNAc4Hex5NeuAc2+Cation:K@2=53	glycopepnew_HCDEThcDiTCIDpeptide_EThcDpd2	44.867	1	12642	24.2	1.4e-06	1	122206	HUMAN	Ceruloplasmin
[9]		P00450	29	1083.95	4	2.6	ENLTAPGSDSAVFFEQGTTR	Incorrect Mono 1Da@Neutral loss=87;HexNAc4Hex5NeuAc2@2=87	glycopepnew_HCDEThcDiTCIDpeptide_EThcDpd2	44.85	2	12640	46.6	1.3e-14	1	122206	HUMAN	Ceruloplasmin
[5]		P02787	86	1196.71	4	0.33	FGSNVTDCSGNFCLFR	Incorrect Mono 1Da@Neutral loss;HexNAc7Hex8Fuc+Cation:K@4	glycopepnew_HCDEThcDiTCIDpeptide_EThcDpd2	42.9	1	11987	17.5	8.4e-06	1	77064.7	HUMAN	Serotransferrin
[1]		P01009	159	1192.91	5	1.6	FNLTEIPEAQIHEGFQELLR	Incorrect Mono 1Da@Neutral loss;HexNAc7Hex7FucNeuAc3@2	glycopepnew_HCDEThcDiTCIDpeptide_EThcDpd2	58.167	2	16946	33.2	3.7e-11	1	46736.9	HUMAN	Alpha-1-antitrypsin
[11]		P01011	24	1192.08	5	-1.1	FNLTETSEAEIHQSFQHLLR	Incorrect Mono 1Da@Neutral loss=10;HexNAc6Hex7NeuAc4+Cation:K@2=10	glycopepnew_HCDEThcDiTCIDpeptide_EThcDpd2	52.05	1	14983	18.8	3.6e-06	1	47651.3	HUMAN	Alpha-1-antichymotrypsin
[11]		P01011	24	1243.53	4	-2	FNLTETSEAEIHQSFQHLLR	Incorrect Mono 1Da@Neutral loss=9;HexNAc5Hex6NeuAc2@2=9	glycopepnew_HCDEThcDiTCIDpeptide_EThcDpd2	42.8	1	11945	18.6	9.9e-05	1	47651.3	HUMAN	Alpha-1-antichymotrypsin
[16]		P04217	15	1309.58	5	-4.4	FQSPAGTEALFELHNISVADSANYSCVYVDLKPPFGGSAPSER	Incorrect Mono 1Da@Neutral loss;HexNAc4Hex5Fuc2@15|23	glycopepnew_HCDEThcDiTCIDpeptide_EThcDpd2	47.233	1	13421	15.2	8e-05	1	54254	HUMAN	Alpha-1B-glycoprotein
[16]		P04217	15	1140.17	6	-4.2	FQSPAGTEALFELHNISVADSANYSCVYVDLKPPFGGSAPSER	Incorrect Mono 1Da@Neutral loss;HexNAc4Hex5Fuc4@15|23	glycopepnew_HCDEThcDiTCIDpeptide_EThcDpd2	50.4	1	14453	16.4	2.3e-05	1	54254	HUMAN	Alpha-1B-glycoprotein
[16]		P04217	15	1372.2	5	-4.1	FQSPAGTEALFELHNISVADSANYSCVYVDLKPPFGGSAPSERL	Incorrect Mono 1Da@Neutral loss;HexNAc4Hex6Fuc2+Cation:K@15|23	glycopepnew_HCDEThcDiTCIDpeptide_EThcDpd2	50.417	2	14457	10.3	4.7e-05	1	54254	HUMAN	Alpha-1B-glycoprotein
[24]		P0C0L4	6	920.356	4	-1.3	FSDGLESNSSTQFEVK	Incorrect Mono 1Da@Neutral loss;HexNAc2Hex9+Cation:K@8	glycopepnew_HCDEThcDiTCIDpeptide_EThcDpd2	26.55	3	6507	61.9	9.5e-23	1	192787	HUMAN	Complement C4-A
[4]		P01023	96	1166.99	4	2	GCVLLSYLNETVTVSASL	Incorrect Mono 1Da@Neutral loss;HexNAc5Hex5Fuc2NeuAc2+Cation:K@9	glycopepnew_HCDEThcDiTCIDpeptide_EThcDpd2	76.217	2	22726	13.9	2.3e-05	1	163292	HUMAN	Alpha-2-macroglobulin
[4]		P01023	96	1176.98	4	-3.9	GCVLLSYLNETVTVSASLE	Incorrect Mono 1Da@Neutral loss=13;HexNAc6Hex5NeuAc2+Cation:K@9=13	glycopepnew_HCDEThcDiTCIDpeptide_EThcDpd2	68.383	1	20194	10	0.00015	1	163292	HUMAN	Alpha-2-macroglobulin
[4]		P01023	96	1088.47	4	-6.8	GCVLLSYLNETVTVSASLESVR	Incorrect Mono 1Da@Neutral loss;HexNAc4Hex5Fuc2+Cation:K@9	glycopepnew_HCDEThcDiTCIDpeptide_EThcDpd2	55.6	1	16127	48.5	4.1e-14	1	163292	HUMAN	Alpha-2-macroglobulin
[4]		P01023	96	1115.5	4	-2.7	GCVLLSYLNETVTVSASLESVR	Incorrect Mono 1Da@Neutral loss;HexNAc4Hex5Fuc3@9	glycopepnew_HCDEThcDiTCIDpeptide_EThcDpd2	55.267	1	16026	24.3	2.5e-07	1	163292	HUMAN	Alpha-2-macroglobulin
[4]		P01023	96	1152.01	4	-7.8	GCVLLSYLNETVTVSASLESVR	Incorrect Mono 1Da@Neutral loss;HexNAc4Hex5Fuc4@9	glycopepnew_HCDEThcDiTCIDpeptide_EThcDpd2	78.983	1	23597	21.3	2.9e-05	1	163292	HUMAN	Alpha-2-macroglobulin
[4]		P01023	96	1315.56	4	-0.73	GCVLLSYLNETVTVSASLESVR	Incorrect Mono 1Da@Neutral loss;HexNAc5Hex6NeuAc3@9||HexNAc6Hex9Fuc+Cation:K@9	glycopepnew_HCDEThcDiTCIDpeptide_EThcDpd2	72.683	1	21585	13	0.00012	1	163292	HUMAN	Alpha-2-macroglobulin
[4]		P01023	96	1188.52	4	-1.9	GCVLLSYLNETVTVSASLESVR	Incorrect Mono 1Da@Neutral loss;HexNAc6Hex7@9	glycopepnew_HCDEThcDiTCIDpeptide_EThcDpd2	74.95	1	22321	13.3	1.8e-06	1	163292	HUMAN	Alpha-2-macroglobulin
[4]		P01023	96	1198.01	4	-1.3	GCVLLSYLNETVTVSASLESVR	Incorrect Mono 1Da@Neutral loss;HexNAc6Hex7+Cation:K@9	glycopepnew_HCDEThcDiTCIDpeptide_EThcDpd2	68.267	2	20158	20.1	2e-06	1	163292	HUMAN	Alpha-2-macroglobulin
[4]		P01023	96	1188.02	4	0.89	GCVLLSYLNETVTVSASLESVR	Incorrect Mono 1Da@Neutral loss=14;HexNAc4Hex5FucNeuAc2@9=14	glycopepnew_HCDEThcDiTCIDpeptide_EThcDpd2	64.033	1	18819	33.3	1.6e-09	1	163292	HUMAN	Alpha-2-macroglobulin
[4]		P01023	96	1088.22	4	0.46	GCVLLSYLNETVTVSASLESVR	Incorrect Mono 1Da@Neutral loss=26;HexNAc4Hex5NeuAc+Cation:K@9=26	glycopepnew_HCDEThcDiTCIDpeptide_EThcDpd2	55.017	1	15949	26	4e-05	1	163292	HUMAN	Alpha-2-macroglobulin
[4]		P01023	96	1115.24	4	-3.1	GCVLLSYLNETVTVSASLESVR	Incorrect Mono 1Da@Neutral loss=45;HexNAc4Hex5FucNeuAc@9=45	glycopepnew_HCDEThcDiTCIDpeptide_EThcDpd2	54.517	1	15791	45.3	1.1e-11	1	163292	HUMAN	Alpha-2-macroglobulin
[4]		P01023	96	1151.76	4	-3.8	GCVLLSYLNETVTVSASLESVR	Incorrect Mono 1Da@Neutral loss=6;HexNAc4Hex5Fuc2NeuAc@9=6	glycopepnew_HCDEThcDiTCIDpeptide_EThcDpd2	74.8	1	22274	33.4	1.9e-08	1	163292	HUMAN	Alpha-2-macroglobulin
[4]		P01023	96	1151.51	4	2.5	GCVLLSYLNETVTVSASLESVR	Incorrect Mono 1Da@Neutral loss=9;HexNAc4Hex5NeuAc2@9=9	glycopepnew_HCDEThcDiTCIDpeptide_EThcDpd2	81.067	1	24232	32.1	1.2e-09	1	163292	HUMAN	Alpha-2-macroglobulin
[4]		P01023	96	1124.74	4	0.37	GCVLLSYLNETVTVSASLESVR	Incorrect Mono 1Da@Neutral loss=95;HexNAc4Hex5FucNeuAc+Cation:K@9=95	glycopepnew_HCDEThcDiTCIDpeptide_EThcDpd2	54.417	1	15762	63	2.7e-19	1	163292	HUMAN	Alpha-2-macroglobulin
[20]		P25311	11	1110.48	5	-6	GDVLHNGNGTYQSWVVVAVPPQDTAPYSCHVQH	Incorrect Mono 1Da@Neutral loss;HexNAc4Hex5Fuc2@8	glycopepnew_HCDEThcDiTCIDpeptide_EThcDpd2	37.283	1	10050	25.2	5.9e-06	1	34259	HUMAN	Zinc-alpha-2-glycoprotein
[20]		P25311	11	1168.9	5	-4.6	GDVLHNGNGTYQSWVVVAVPPQDTAPYSCHVQH	Incorrect Mono 1Da@Neutral loss;HexNAc6Hex6@8;Oxidation@14	glycopepnew_HCDEThcDiTCIDpeptide_EThcDpd2	43.417	1	12168	17.2	3.1e-06	1	34259	HUMAN	Zinc-alpha-2-glycoprotein
[20]		P25311	11	1234.86	6	-3.3	GDVLHNGNGTYQSWVVVAVPPQDTAPYSCHVQHSSLAQ	Incorrect Mono 1Da@Neutral loss;HexNAc7Hex7FucNeuAc2@8	glycopepnew_HCDEThcDiTCIDpeptide_EThcDpd2	49.667	2	14219	15.7	1.6e-05	1	34259	HUMAN	Zinc-alpha-2-glycoprotein
[20]		P25311	11	1176.03	6	0.9	GDVLHNGNGTYQSWVVVAVPPQDTAPYSCHVQHSSLAQPLVVPWEAS	Incorrect Mono 1Da@Neutral loss;HexNAc4Hex5Fuc2+Cation:K@8	glycopepnew_HCDEThcDiTCIDpeptide_EThcDpd2	46.267	1	13115	16.9	3.1e-06	1	34259	HUMAN	Zinc-alpha-2-glycoprotein
[7]		P02790	44	873.952	5	5.6	GHGHRNGTGHGNSTHHGPEYMR	Incorrect Mono 1Da@Neutral loss;HexNAc4Hex6Fuc+Cation:K@12=19	glycopepnew_HCDEThcDiTCIDpeptide_EThcDpd2	14.333	2	2338	14	2.4e-05	1	51676.8	HUMAN	Hemopexin
[7]		P02790	44	1063.4	5	-7.4	GHGHRNGTGHGNSTHHGPEYMR	Incorrect Mono 1Da@Neutral loss;HexNAc5Hex7FucNeuAc2+Cation:K@6|12	glycopepnew_HCDEThcDiTCIDpeptide_EThcDpd2	14.35	1	2340	25.6	6.4e-08	1	51676.8	HUMAN	Hemopexin
[7]		P02790	44	865.833	4	4.2	GHGNSTHHGPEYMR	Incorrect Mono 1Da@Neutral loss=8;HexNAc5Hex5+Cation:K@4=8;Oxidation@13	glycopepnew_HCDEThcDiTCIDpeptide_EThcDpd2	14.133	2	2277	21.4	2e-07	1	51676.8	HUMAN	Hemopexin
[7]		P02790	44	862.949	5	3.3	GHRNGTGHGNSTHHGPEYMR	Incorrect Mono 1Da@Neutral loss;HexNAc7Hex4+Cation:K@4|10	glycopepnew_HCDEThcDiTCIDpeptide_EThcDpd2	14.333	1	2336	23.8	1.7e-05	1	51676.8	HUMAN	Hemopexin
[13]		P01871	15	1156.97	4	3.4	GLTFQQNASSMCVPDQDTAIR	Incorrect Mono 1Da@Neutral loss;HexNAc5Hex4Fuc2NeuAc+Cation:K@7	glycopepnew_HCDEThcDiTCIDpeptide_EThcDpd2	35.417	2	9426	49.1	3.7e-13	1	49440.2	HUMAN	Immunoglobulin heavy constant mu
[13]		P01871	15	1155.48	4	2	GLTFQQNASSMCVPDQDTAIR	Incorrect Mono 1Da@Neutral loss=10;HexNAc5Hex5FucNeuAc@7=10;Oxidation@11=10	glycopepnew_HCDEThcDiTCIDpeptide_EThcDpd2	31.233	1	8026	35.8	1.3e-11	1	49440.2	HUMAN	Immunoglobulin heavy constant mu
[13]		P01871	15	1173.48	4	1.8	GLTFQQNASSMCVPDQDTAIR	Incorrect Mono 1Da@Neutral loss=45;HexNAc4Hex5FucNeuAc2@7=45	glycopepnew_HCDEThcDiTCIDpeptide_EThcDpd2	40.717	1	11232	26.7	2e-09	1	49440.2	HUMAN	Immunoglobulin heavy constant mu
[3]		P00738	120	1130.52	5	1.8	GSFPWQAKMVSHHNLTTGATLINEQWLLTTAK	Incorrect Mono 1Da@Neutral loss;HexNAc6Hex4Fuc+Cation:K@14;Oxidation@9|26	glycopepnew_HCDEThcDiTCIDpeptide_EThcDpd2	38.883	1	10609	22.4	3.4e-05	1	45205.7	HUMAN	Haptoglobin
[3]		P00738	120	1205.55	5	-0.16	GSFPWQAKMVSHHNLTTGATLINEQWLLTTAK	Incorrect Mono 1Da@Neutral loss;Oxidation@9=19;HexNAc5Hex6Fuc3@14	glycopepnew_HCDEThcDiTCIDpeptide_EThcDpd2	38.817	1	10584	28.2	1.4e-08	1	45205.7	HUMAN	Haptoglobin
[3]		P00738	120	1202.14	5	-4.5	GSFPWQAKMVSHHNLTTGATLINEQWLLTTAK	Incorrect Mono 1Da@Neutral loss=15;HexNAc5Hex6FucNeuAc@14=15	glycopepnew_HCDEThcDiTCIDpeptide_EThcDpd2	36.017	1	9635	24	6.8e-06	1	45205.7	HUMAN	Haptoglobin
[3]		P00738	120	1198.33	5	-3.6	GSFPWQAKMVSHHNLTTGATLINEQWLLTTAK	Incorrect Mono 1Da@Neutral loss=17;HexNAc4Hex5Fuc3NeuAc+Cation:K&Oxidation@(14&9)||HexNAc4Hex6Fuc2NeuAc+Cation:K@14	glycopepnew_HCDEThcDiTCIDpeptide_EThcDpd2	41.683	1	11562	20	1.2e-05	1	45205.7	HUMAN	Haptoglobin
[5]		P02787	86	1195.7	4	3.7	GSNVTDCSGNFCLFR	Incorrect Mono 1Da@Neutral loss;HexNAc5Hex6FucNeuAc3+Cation:K@3	glycopepnew_HCDEThcDiTCIDpeptide_EThcDpd2	50.75	1	14565	15.2	2.1e-05	1	77064.7	HUMAN	Serotransferrin
[5]		P02787	86	1186.71	4	2.1	GSNVTDCSGNFCLFR	Incorrect Mono 1Da@Neutral loss;HexNAc7Hex8NeuAc@3	glycopepnew_HCDEThcDiTCIDpeptide_EThcDpd2	50.617	1	14526	18.8	0.00014	1	77064.7	HUMAN	Serotransferrin
[30]		P01042	5	1371.57	4	1.2	HGIQYFNNNTQHSSLFMLNEVK	Incorrect Mono 1Da@Neutral loss;HexNAc5Hex6NeuAc3@8||HexNAc6Hex9Fuc+Cation:K@8	glycopepnew_HCDEThcDiTCIDpeptide_EThcDpd2	40.567	1	11178	34.9	2.8e-11	1	71958	HUMAN	Kininogen-1
[30]		P01042	5	1207.52	4	2.4	HGIQYFNNNTQHSSLFMLNEVK	Incorrect Mono 1Da@Neutral loss=29;HexNAc4Hex5NeuAc2@8=29	glycopepnew_HCDEThcDiTCIDpeptide_EThcDpd2	36.6	1	9824	33.4	2.1e-10	1	71958	HUMAN	Kininogen-1
[29]		Q14624	6	1341.79	5	-0.53	HLQMDIHIFEPQGISFLETESTFMTNQLVDALTTWQN	Incorrect Mono 1Da@Neutral loss;Oxidation@35=13;HexNAc6Hex7@37	glycopepnew_HCDEThcDiTCIDpeptide_EThcDpd2	67.417	1	19893	18	4.4e-06	1	103358	HUMAN	Inter-alpha-trypsin inhibitor heavy chain H4
[14]		P01019	14	997.171	4	-4.7	HLVIHNESTCEQLAK	Incorrect Mono 1Da@Neutral loss;HexNAc4Hex5Fuc2NeuAc@6	glycopepnew_HCDEThcDiTCIDpeptide_EThcDpd2	21.65	1	4895	23.5	1.5e-11	1	53154.7	HUMAN	Angiotensinogen
[14]		P01019	14	924.146	4	-1.1	HLVIHNESTCEQLAK	Incorrect Mono 1Da@Neutral loss=104;HexNAc4Hex5NeuAc@6=104	glycopepnew_HCDEThcDiTCIDpeptide_EThcDpd2	17.133	1	3322	42.4	3.4e-14	1	53154.7	HUMAN	Angiotensinogen
[14]		P01019	14	1006.41	4	-1.6	HLVIHNESTCEQLAK	Incorrect Mono 1Da@Neutral loss=104;HexNAc4Hex5NeuAc2+Cation:K@6=104	glycopepnew_HCDEThcDiTCIDpeptide_EThcDpd2	19.233	2	4052	55.6	8e-18	1	53154.7	HUMAN	Angiotensinogen
[14]		P01019	14	1124.97	4	-2.6	HLVIHNESTCEQLAK	Incorrect Mono 1Da@Neutral loss=37;HexNAc5Hex6Fuc3NeuAc@6=37	glycopepnew_HCDEThcDiTCIDpeptide_EThcDpd2	18.767	2	3888	31.6	1.4e-09	1	53154.7	HUMAN	Angiotensinogen
[3]		P00738	120	1017.2	4	3.1	HPNYSQVDIGLIK	Incorrect Mono 1Da@Neutral loss;HexNAc8Hex5Fuc@3	glycopepnew_HCDEThcDiTCIDpeptide_EThcDpd2	51.55	1	14829	16.3	2.5e-07	1	45205.7	HUMAN	Haptoglobin
[2]		P01876	150	1039	4	1.7	HRPALEDLLLGSEANLTCTLTGLR	Incorrect Mono 1Da@Neutral loss;HexNAc5Hex3@15	glycopepnew_HCDEThcDiTCIDpeptide_EThcDpd2	43.667	1	12241	32.2	5.6e-06	2	37655	HUMAN	Immunoglobulin heavy constant alpha 1
[2]		P01876	150	1151.51	4	-1.1	HRPALEDLLLGSEANLTCTLTGLR	Incorrect Mono 1Da@Neutral loss=16;HexNAc4Hex5NeuAc+Cation:K@15=16	glycopepnew_HCDEThcDiTCIDpeptide_EThcDpd2	47.467	2	13504	31.9	6.2e-09	2	37655	HUMAN	Immunoglobulin heavy constant alpha 1
[2]		P01876	150	913.82	5	-1.3	HRPALEDLLLGSEANLTCTLTGLR	Incorrect Mono 1Da@Neutral loss=43;HexNAc4Hex5NeuAc@15=43	glycopepnew_HCDEThcDiTCIDpeptide_EThcDpd2	47.45	1	13496	44.8	1.1e-10	2	37655	HUMAN	Immunoglobulin heavy constant alpha 1
[8]		P01024	32	1211.19	3	-1.4	HYLMWGLSSDFWGEKPNLSY	Incorrect Mono 1Da@Neutral loss;HexNAc2Hex3Fuc2&Oxidation@(17&(4|5|12))||HexNAc2Hex4Fuc@17	glycopepnew_HCDEThcDiTCIDpeptide_EThcDpd2	61.05	2	17871	13	1.7e-06	1	187150	HUMAN	Complement C3
[8]		P01024	32	1233.73	5	-2.9	HYLMWGLSSDFWGEKPNLSYIIGKDTWVEHW	Incorrect Mono 1Da@Neutral loss;HexNAc6Hex7@17;Oxidation@4|5	glycopepnew_HCDEThcDiTCIDpeptide_EThcDpd2	29.75	1	7527	14.2	3.8e-05	1	187150	HUMAN	Complement C3
[2-1]	33	P01877	119	753.292	5	-2.9	HYTNSSQDVTVPCR	Incorrect Mono 1Da@Neutral loss=29;HexNAc4Hex5FucNeuAc+Cation:K@4=29	glycopepnew_HCDEThcDiTCIDpeptide_EThcDpd2	17.3	1	3384	16.9	1.1e-05	1	36591.7	HUMAN	Immunoglobulin heavy constant alpha 2
[2-1]	33	P01877	119	793.909	5	-1.1	HYTNSSQDVTVPCR	Incorrect Mono 1Da@Neutral loss=33;HexNAc5Hex5FucNeuAc+Cation:K@4=33	glycopepnew_HCDEThcDiTCIDpeptide_EThcDpd2	17.4	1	3420	31	1.7e-06	1	36591.7	HUMAN	Immunoglobulin heavy constant alpha 2
[2-1]	33	P01877	119	1249.51	5	-3	HYTNSSQDVTVPCRVPPPPPCCHPR	Incorrect Mono 1Da@Neutral loss;HexNAc7Hex7FucNeuAc2@4	glycopepnew_HCDEThcDiTCIDpeptide_EThcDpd2	29.983	2	7605	15.7	3.8e-05	1	36591.7	HUMAN	Immunoglobulin heavy constant alpha 2
[4]		P01023	96	1169.73	4	-5.2	IITILEEEMNVSVCGLYTYGK	Incorrect Mono 1Da@Neutral loss;Oxidation@9;HexNAc2Hex11+Cation:K@10	glycopepnew_HCDEThcDiTCIDpeptide_EThcDpd2	67	1	19762	26.2	3.3e-09	1	163292	HUMAN	Alpha-2-macroglobulin
[4]		P01023	96	1170.24	4	-5.9	IITILEEEMNVSVCGLYTYGK	Incorrect Mono 1Da@Neutral loss;Oxidation@9;HexNAc6Hex6+Cation:K@10	glycopepnew_HCDEThcDiTCIDpeptide_EThcDpd2	64.583	1	18995	11.9	0.00012	1	163292	HUMAN	Alpha-2-macroglobulin
[4]		P01023	96	1169.74	4	0.34	IITILEEEMNVSVCGLYTYGK	Incorrect Mono 1Da@Neutral loss=12;HexNAc4Hex4FucNeuAc2+Cation:K&Oxidation@(10&9)||HexNAc4Hex5NeuAc2+Cation:K@10	glycopepnew_HCDEThcDiTCIDpeptide_EThcDpd2	69.783	1	20647	12.6	7.4e-06	1	163292	HUMAN	Alpha-2-macroglobulin
[4]		P01023	96	1160.5	4	-7.6	IITILEEEMNVSVCGLYTYGK	Incorrect Mono 1Da@Neutral loss=18;HexNAc4Hex5Fuc2NeuAc@10=18	glycopepnew_HCDEThcDiTCIDpeptide_EThcDpd2	71.367	1	21169	16.9	3.3e-05	1	163292	HUMAN	Alpha-2-macroglobulin
[4]		P01023	96	1169.99	4	-2.7	IITILEEEMNVSVCGLYTYGK	Incorrect Mono 1Da@Neutral loss=32;HexNAc4Hex5Fuc2NeuAc+Cation:K@10=32	glycopepnew_HCDEThcDiTCIDpeptide_EThcDpd2	62.15	1	18234	27.3	1.1e-08	1	163292	HUMAN	Alpha-2-macroglobulin
[4]		P01023	96	1083.91	5	4	IITILEEEMNVSVCGLYTYGKPVPGHVTVSICR	Incorrect Mono 1Da@Neutral loss;Oxidation@9;HexNAc5Hex4@10	glycopepnew_HCDEThcDiTCIDpeptide_EThcDpd2	34.6	1	9146	26	1.5e-08	1	163292	HUMAN	Alpha-2-macroglobulin
[5]		P02787	86	1210.31	5	-8	IMNGEADAMSLDGGFVYIAGKCGLVPVLAENYNK	Incorrect Mono 1Da@Neutral loss;HexNAc5Hex4FucNeuAc2+Cation:K@33	glycopepnew_HCDEThcDiTCIDpeptide_EThcDpd2	54.133	1	15665	28.6	2.2e-09	1	77064.7	HUMAN	Serotransferrin
[5]		P02787	86	1205.71	5	-2.4	IMNGEADAMSLDGGFVYIAGKCGLVPVLAENYNK	Incorrect Mono 1Da@Neutral loss;Oxidation@9;HexNAc6Hex7+Cation:K@33	glycopepnew_HCDEThcDiTCIDpeptide_EThcDpd2	54.117	2	15659	22.6	1.2e-07	1	77064.7	HUMAN	Serotransferrin
[1]		P01009	159	1344.78	5	-3.2	KADTHDEILEGLNFNLTEIPEAQIHEGFQELLR	Incorrect Mono 1Da@Neutral loss;HexNAc5Hex6NeuAc3+Cation:K@15	glycopepnew_HCDEThcDiTCIDpeptide_EThcDpd2	62.717	1	18415	20.8	2e-06	1	46736.9	HUMAN	Alpha-1-antitrypsin
[28]		P51884	5	1091.49	4	0.89	KLHINHNNLTESVGPLPK	Incorrect Mono 1Da@Neutral loss=73;HexNAc4Hex5FucNeuAc2@8=73	glycopepnew_HCDEThcDiTCIDpeptide_EThcDpd2	23.883	1	5634	44.2	3.3e-16	1	38429.3	HUMAN	Lumican
[4]		P01023	96	1262.3	4	-7.4	KVSNQTLSLFFTVLQDVPVR	Incorrect Mono 1Da@Neutral loss;HexNAc5Hex6FucNeuAc2+Cation:K@4	glycopepnew_HCDEThcDiTCIDpeptide_EThcDpd2	78.7	1	23504	14.5	0.0001	1	163292	HUMAN	Alpha-2-macroglobulin
[3]		P00738	120	1160.51	4	-1.9	KVVLHPNYSQVDIGLIK	Incorrect Mono 1Da@Neutral loss;HexNAc6Hex9+Cation:K@7	glycopepnew_HCDEThcDiTCIDpeptide_EThcDpd2	39.7	2	10887	26.2	5.8e-06	1	45205.7	HUMAN	Haptoglobin
[1]		P01009	159	1023.2	4	0.37	KYLGNATAIFFLPDEGK	Incorrect Mono 1Da@Neutral loss=100;HexNAc4Hex5NeuAc2@5=100	glycopepnew_HCDEThcDiTCIDpeptide_EThcDpd2	44.983	1	12685	48.4	1.2e-14	1	46736.9	HUMAN	Alpha-1-antitrypsin
[2]		P01876	150	903.627	4	0.73	LAGKPTHVNVSV	Incorrect Mono 1Da@Neutral loss=22;HexNAc4Hex5FucNeuAc2+Cation:K@9=22	glycopepnew_HCDEThcDiTCIDpeptide_EThcDpd2	23.5	1	5501	15.1	1.7e-06	1	37655	HUMAN	Immunoglobulin heavy constant alpha 1
[2]		P01876	150	919.149	4	-0.34	LAGKPTHVNVSVVM	Incorrect Mono 1Da@Neutral loss=8;HexNAc4Hex5NeuAc2@9=8;Oxidation@14=8	glycopepnew_HCDEThcDiTCIDpeptide_EThcDpd2	32.5	2	8441	15.1	2.7e-06	1	37655	HUMAN	Immunoglobulin heavy constant alpha 1
[2]		P01876	150	914.906	4	1.3	LAGKPTHVNVSVVMA	Incorrect Mono 1Da@Neutral loss=16;HexNAc5Hex5NeuAc@9=16;Oxidation@14=16	glycopepnew_HCDEThcDiTCIDpeptide_EThcDpd2	39.75	1	10905	12.1	0.00012	1	37655	HUMAN	Immunoglobulin heavy constant alpha 1
[2]		P01876	150	948.606	5	2.1	LAGKPTHVNVSVVMAEVDGTC	Incorrect Mono 1Da@Neutral loss;HexNAc5Hex5FucNeuAc2@9	glycopepnew_HCDEThcDiTCIDpeptide_EThcDpd2	39.083	1	10665	21.1	3.6e-12	1	37655	HUMAN	Immunoglobulin heavy constant alpha 1
[2]		P01876	150	956.196	5	0.33	LAGKPTHVNVSVVMAEVDGTC	Incorrect Mono 1Da@Neutral loss;HexNAc5Hex5FucNeuAc2+Cation:K@9	glycopepnew_HCDEThcDiTCIDpeptide_EThcDpd2	37.2	1	10023	19.6	3.2e-06	1	37655	HUMAN	Immunoglobulin heavy constant alpha 1
[2]		P01876	150	1054.21	4	-0.59	LAGKPTHVNVSVVMAEVDGTC	Incorrect Mono 1Da@Neutral loss;HexNAc6Hex4Fuc@9;Oxidation@14	glycopepnew_HCDEThcDiTCIDpeptide_EThcDpd2	20.55	2	4507	14.2	2.4e-05	1	37655	HUMAN	Immunoglobulin heavy constant alpha 1
[2]		P01876	150	956.594	5	-5	LAGKPTHVNVSVVMAEVDGTC	Incorrect Mono 1Da@Neutral loss;HexNAc7Hex7+Cation:K@9	glycopepnew_HCDEThcDiTCIDpeptide_EThcDpd2	40.767	1	11252	18.1	2.5e-06	1	37655	HUMAN	Immunoglobulin heavy constant alpha 1
[2]		P01876	150	1121.96	4	0.83	LAGKPTHVNVSVVMAEVDGTC	Incorrect Mono 1Da@Neutral loss=11;HexNAc5Hex4NeuAc2+Cation:K@9=11;Oxidation@14=11	glycopepnew_HCDEThcDiTCIDpeptide_EThcDpd2	34.9	1	9252	14.8	1.7e-05	1	37655	HUMAN	Immunoglobulin heavy constant alpha 1
[2]		P01876	150	1112.48	4	6	LAGKPTHVNVSVVMAEVDGTC	Incorrect Mono 1Da@Neutral loss=18;HexNAc5Hex4NeuAc2@9=18;Oxidation@14=18	glycopepnew_HCDEThcDiTCIDpeptide_EThcDpd2	34.567	1	9136	14.8	3.1e-06	1	37655	HUMAN	Immunoglobulin heavy constant alpha 1
[2]		P01876	150	1138.74	4	3.6	LAGKPTHVNVSVVMAEVDGTC	Incorrect Mono 1Da@Neutral loss=21;HexNAc4Hex5FucNeuAc2@9=21;Oxidation@14=21	glycopepnew_HCDEThcDiTCIDpeptide_EThcDpd2	33.267	1	8699	13	0.00012	1	37655	HUMAN	Immunoglobulin heavy constant alpha 1
[2]		P01876	150	915.58	5	0.45	LAGKPTHVNVSVVMAEVDGTC	Incorrect Mono 1Da@Neutral loss=27;HexNAc4Hex5FucNeuAc2+Cation:K@9=27	glycopepnew_HCDEThcDiTCIDpeptide_EThcDpd2	36.883	1	9927	26.2	1.6e-08	1	37655	HUMAN	Immunoglobulin heavy constant alpha 1
[2]		P01876	150	1061.96	4	2.4	LAGKPTHVNVSVVMAEVDGTC	Incorrect Mono 1Da@Neutral loss=28;HexNAc4Hex4Fuc2NeuAc&Oxidation@(9&14)||HexNAc4Hex5FucNeuAc@9	glycopepnew_HCDEThcDiTCIDpeptide_EThcDpd2	36.367	2	9745	15.1	3.5e-05	1	37655	HUMAN	Immunoglobulin heavy constant alpha 1
[2]		P01876	150	1112.73	4	3.3	LAGKPTHVNVSVVMAEVDGTC	Incorrect Mono 1Da@Neutral loss=29;HexNAc5Hex4Fuc2NeuAc&Oxidation@(9&14)||HexNAc5Hex5FucNeuAc@9	glycopepnew_HCDEThcDiTCIDpeptide_EThcDpd2	38.067	1	10325	13	1.4e-06	1	37655	HUMAN	Immunoglobulin heavy constant alpha 1
[2]		P01876	150	1112.73	4	0.49	LAGKPTHVNVSVVMAEVDGTC	Incorrect Mono 1Da@Neutral loss=29;HexNAc5Hex5FucNeuAc@9=10	glycopepnew_HCDEThcDiTCIDpeptide_EThcDpd2	32.817	1	8543	20.8	6.5e-07	1	37655	HUMAN	Immunoglobulin heavy constant alpha 1
[2]		P01876	150	1152.99	4	5.3	LAGKPTHVNVSVVMAEVDGTC	Incorrect Mono 1Da@Neutral loss=34;HexNAc5Hex5NeuAc2@9=34;Oxidation@14=34	glycopepnew_HCDEThcDiTCIDpeptide_EThcDpd2	34.7	2	9185	16	2e-06	1	37655	HUMAN	Immunoglobulin heavy constant alpha 1
[2]		P01876	150	1098.22	4	0.91	LAGKPTHVNVSVVMAEVDGTC	Incorrect Mono 1Da@Neutral loss=36;HexNAc4Hex5NeuAc2@9=36	glycopepnew_HCDEThcDiTCIDpeptide_EThcDpd2	36.583	2	9822	13	2.5e-05	1	37655	HUMAN	Immunoglobulin heavy constant alpha 1
[2]		P01876	150	909.378	5	-2.6	LAGKPTHVNVSVVMAEVDGTC	Incorrect Mono 1Da@Neutral loss=36;HexNAc6Hex5NeuAc+Cation:K@9=36	glycopepnew_HCDEThcDiTCIDpeptide_EThcDpd2	23.017	1	5337	24.1	1.5e-06	1	37655	HUMAN	Immunoglobulin heavy constant alpha 1
[2]		P01876	150	1134.73	4	0.82	LAGKPTHVNVSVVMAEVDGTC	Incorrect Mono 1Da@Neutral loss=43;HexNAc4Hex5FucNeuAc2@9=43	glycopepnew_HCDEThcDiTCIDpeptide_EThcDpd2	45.983	2	13019	19.3	1.2e-06	1	37655	HUMAN	Immunoglobulin heavy constant alpha 1
[2]		P01876	150	897.974	5	-2.4	LAGKPTHVNVSVVMAEVDGTC	Incorrect Mono 1Da@Neutral loss=6;HexNAc5Hex4Fuc2NeuAc+Cation:K&Oxidation@(9&14)||HexNAc5Hex5FucNeuAc+Cation:K@9	glycopepnew_HCDEThcDiTCIDpeptide_EThcDpd2	34.933	1	9263	22.9	8e-08	1	37655	HUMAN	Immunoglobulin heavy constant alpha 1
[2]		P01876	150	915.779	5	-2.5	LAGKPTHVNVSVVMAEVDGTCY	Incorrect Mono 1Da@Neutral loss;HexNAc2Hex11+Cation:K@9||HexNAc4Hex4FucNeuAc2+Cation:K@9	glycopepnew_HCDEThcDiTCIDpeptide_EThcDpd2	37.55	1	10151	16	8.2e-06	1	37655	HUMAN	Immunoglobulin heavy constant alpha 1
[2]		P01876	150	906.154	4	0.94	LAGKPTHVNVSVVMAEVDGTCY	Incorrect Mono 1Da@Neutral loss;HexNAc3Hex4@9;Oxidation@14	glycopepnew_HCDEThcDiTCIDpeptide_EThcDpd2	23.433	1	5478	17.8	6.2e-05	1	37655	HUMAN	Immunoglobulin heavy constant alpha 1
[2]		P01876	150	987.181	4	1.8	LAGKPTHVNVSVVMAEVDGTCY	Incorrect Mono 1Da@Neutral loss;HexNAc3Hex6@9;Oxidation@14	glycopepnew_HCDEThcDiTCIDpeptide_EThcDpd2	23.517	1	5503	12.4	2.5e-05	1	37655	HUMAN	Immunoglobulin heavy constant alpha 1
[2]		P01876	150	1086.22	4	5.6	LAGKPTHVNVSVVMAEVDGTCY	Incorrect Mono 1Da@Neutral loss;HexNAc5Hex4Fuc2+Cation:K@9	glycopepnew_HCDEThcDiTCIDpeptide_EThcDpd2	32.95	1	8597	24.1	1e-08	1	37655	HUMAN	Immunoglobulin heavy constant alpha 1
[2]		P01876	150	956.796	5	-4.8	LAGKPTHVNVSVVMAEVDGTCY	Incorrect Mono 1Da@Neutral loss;HexNAc7Hex6+Cation:K@9	glycopepnew_HCDEThcDiTCIDpeptide_EThcDpd2	37.5	1	10131	13	1.4e-05	1	37655	HUMAN	Immunoglobulin heavy constant alpha 1
[2]		P01876	150	1131.24	4	0.69	LAGKPTHVNVSVVMAEVDGTCY	Incorrect Mono 1Da@Neutral loss=11;HexNAc6Hex4NeuAc@9=11;Oxidation@14=11	glycopepnew_HCDEThcDiTCIDpeptide_EThcDpd2	26.033	3	6336	14.8	6.2e-06	1	37655	HUMAN	Immunoglobulin heavy constant alpha 1
[2]		P01876	150	1075.7	4	-2.7	LAGKPTHVNVSVVMAEVDGTCY	Incorrect Mono 1Da@Neutral loss=17;HexNAc4Hex4FucNeuAc+Cation:K&Oxidation@(9&14)||HexNAc4Hex5NeuAc+Cation:K@9	glycopepnew_HCDEThcDiTCIDpeptide_EThcDpd2	36.7	2	9863	16.9	1e-06	1	37655	HUMAN	Immunoglobulin heavy constant alpha 1
[2]		P01876	150	1175.5	4	2.1	LAGKPTHVNVSVVMAEVDGTCY	Incorrect Mono 1Da@Neutral loss=36;HexNAc4Hex5FucNeuAc2@9=36	glycopepnew_HCDEThcDiTCIDpeptide_EThcDpd2	41.8	2	11598	16.6	3.3e-06	1	37655	HUMAN	Immunoglobulin heavy constant alpha 1
[2]		P01876	150	1153.5	4	1	LAGKPTHVNVSVVMAEVDGTCY	Incorrect Mono 1Da@Neutral loss=36;HexNAc5Hex4Fuc2NeuAc&Oxidation@(9&14)||HexNAc5Hex5FucNeuAc@9	glycopepnew_HCDEThcDiTCIDpeptide_EThcDpd2	38.083	1	10327	16	2.6e-06	1	37655	HUMAN	Immunoglobulin heavy constant alpha 1
[4]		P01023	96	1267.26	3	-7.6	LDKVSNQTLSLFFTVLQDVPVR	Incorrect Mono 1Da@Neutral loss;HexNAc3Hex3Fuc+Cation:K@6	glycopepnew_HCDEThcDiTCIDpeptide_EThcDpd2	78.383	1	23411	26	3.2e-09	1	163292	HUMAN	Alpha-2-macroglobulin
[1]		P01009	159	1315.76	5	0.57	LEGLNFNLTEIPEAQIHEGFQELLR	Incorrect Mono 1Da@Neutral loss;HexNAc6Hex7FucNeuAc4@7	glycopepnew_HCDEThcDiTCIDpeptide_EThcDpd2	57.283	2	16670	16.8	4.3e-06	1	46736.9	HUMAN	Alpha-1-antitrypsin
[28]		P51884	5	1169.26	4	-0.68	LHINHNNLTESVGPLPK	Incorrect Mono 1Da@Neutral loss;HexNAc6Hex7FucNeuAc@7	glycopepnew_HCDEThcDiTCIDpeptide_EThcDpd2	23.717	1	5574	33.8	2.7e-11	1	38429.3	HUMAN	Lumican
[3]		P00738	120	859.589	4	4.5	LNHSENATAK	Incorrect Mono 1Da@Neutral loss;HexNAc5Hex8+Cation:K@2=17	glycopepnew_HCDEThcDiTCIDpeptide_EThcDpd2	20.35	1	4443	13.2	0.00012	1	45205.7	HUMAN	Haptoglobin
[2]		P01876	150	1235.8	4	1.2	LSLHRPALEDLLLGSEANLTCTLT	Incorrect Mono 1Da@Neutral loss;HexNAc5Hex5Fuc3+Cation:K@18	glycopepnew_HCDEThcDiTCIDpeptide_EThcDpd2	48.183	2	13729	16	3.3e-05	2	37655	HUMAN	Immunoglobulin heavy constant alpha 1
[2]		P01876	150	877.01	5	-2.5	LSLHRPALEDLLLGSEANLTCTLTGLR	Incorrect Mono 1Da@Neutral loss;HexNAc2Hex6+Cation:K@18	glycopepnew_HCDEThcDiTCIDpeptide_EThcDpd2	44.533	1	12528	53.2	1.9e-14	2	37655	HUMAN	Immunoglobulin heavy constant alpha 1
[2]		P01876	150	1127.04	4	0.74	LSLHRPALEDLLLGSEANLTCTLTGLR	Incorrect Mono 1Da@Neutral loss;HexNAc2Hex7@18	glycopepnew_HCDEThcDiTCIDpeptide_EThcDpd2	44.5	1	12513	23	1.7e-09	2	37655	HUMAN	Immunoglobulin heavy constant alpha 1
[2]		P01876	150	1167.55	4	-4.5	LSLHRPALEDLLLGSEANLTCTLTGLR	Incorrect Mono 1Da@Neutral loss;HexNAc2Hex8@18	glycopepnew_HCDEThcDiTCIDpeptide_EThcDpd2	44.517	1	12522	25.7	1.1e-07	2	37655	HUMAN	Immunoglobulin heavy constant alpha 1
[2]		P01876	150	1137.29	4	0.26	LSLHRPALEDLLLGSEANLTCTLTGLR	Incorrect Mono 1Da@Neutral loss;HexNAc3Hex6@18	glycopepnew_HCDEThcDiTCIDpeptide_EThcDpd2	44.5	2	12518	32.8	7.5e-10	2	37655	HUMAN	Immunoglobulin heavy constant alpha 1
[2]		P01876	150	1147.55	4	0.64	LSLHRPALEDLLLGSEANLTCTLTGLR	Incorrect Mono 1Da@Neutral loss;HexNAc4Hex5@18	glycopepnew_HCDEThcDiTCIDpeptide_EThcDpd2	48.317	2	13770	28.8	2.7e-07	2	37655	HUMAN	Immunoglobulin heavy constant alpha 1
[2]		P01876	150	976.461	5	-0.94	LSLHRPALEDLLLGSEANLTCTLTGLR	Incorrect Mono 1Da@Neutral loss=102;HexNAc4Hex5NeuAc@18=102	glycopepnew_HCDEThcDiTCIDpeptide_EThcDpd2	47.967	1	13666	70.6	2e-22	2	37655	HUMAN	Immunoglobulin heavy constant alpha 1
[2]		P01876	150	1049.49	5	-2	LSLHRPALEDLLLGSEANLTCTLTGLR	Incorrect Mono 1Da@Neutral loss=34;HexNAc5Hex6NeuAc@18=34	glycopepnew_HCDEThcDiTCIDpeptide_EThcDpd2	48.067	1	13691	49.6	3.3e-13	2	37655	HUMAN	Immunoglobulin heavy constant alpha 1
[2]		P01876	150	1008.87	5	1.7	LSLHRPALEDLLLGSEANLTCTLTGLR	Incorrect Mono 1Da@Neutral loss=35;HexNAc4Hex6NeuAc@18=35	glycopepnew_HCDEThcDiTCIDpeptide_EThcDpd2	48.283	2	13758	30.6	2.7e-12	2	37655	HUMAN	Immunoglobulin heavy constant alpha 1
[2]		P01876	150	1271.1	4	1.4	LSLHRPALEDLLLGSEANLTCTLTGLR	Incorrect Mono 1Da@Neutral loss=6;HexNAc5Hex5NeuAc@18=6	glycopepnew_HCDEThcDiTCIDpeptide_EThcDpd2	49.45	1	14150	20.4	8.5e-06	2	37655	HUMAN	Immunoglobulin heavy constant alpha 1
[2]		P01876	150	987.249	5	-2.5	LSLHRPALEDLLLGSEANLTCTLTGLRDA	Incorrect Mono 1Da@Neutral loss;HexNAc3Hex7+Cation:K@18	glycopepnew_HCDEThcDiTCIDpeptide_EThcDpd2	47.35	1	13465	13.9	8.2e-06	2	37655	HUMAN	Immunoglobulin heavy constant alpha 1
[2-1]	33	P01877	119	1252.6	4	-5.8	LSLHRPALEDLLLGSEANLTCTLTGLRDASGATFTWTP	Incorrect Mono 1Da@Neutral loss;HexNAc2Hex3@18;Oxidation@36	glycopepnew_HCDEThcDiTCIDpeptide_EThcDpd2	43.95	2	12340	18.1	1.8e-06	1	36591.7	HUMAN	Immunoglobulin heavy constant alpha 2
[4]		P01023	96	1094.46	4	-0.6	LSYLNETVTVSASLESVR	Incorrect Mono 1Da@Neutral loss;HexNAc4Hex6Fuc2NeuAc+Cation:K@5	glycopepnew_HCDEThcDiTCIDpeptide_EThcDpd2	57.15	2	16626	19.4	1.6e-05	1	163292	HUMAN	Alpha-2-macroglobulin
[6]		P02763	91	1093.98	4	3.5	LVPVPITNATLDQITGK	Incorrect Mono 1Da@Neutral loss;HexNAc5Hex5FucNeuAc2+Cation:K@8	glycopepnew_HCDEThcDiTCIDpeptide_EThcDpd2	48.867	1	13961	40.8	1.4e-13	1	23511.8	HUMAN	Alpha-1-acid glycoprotein 1
[6]		P02763	91	1134.49	4	-5.3	LVPVPITNATLDQITGK	Incorrect Mono 1Da@Neutral loss;HexNAc5Hex6FucNeuAc2+Cation:K@8	glycopepnew_HCDEThcDiTCIDpeptide_EThcDpd2	57.4	1	16705	33.1	8.5e-13	1	23511.8	HUMAN	Alpha-1-acid glycoprotein 1
[6]		P02763	91	1170.75	4	-0.14	LVPVPITNATLDQITGK	Incorrect Mono 1Da@Neutral loss;HexNAc5Hex6NeuAc3+Cation:K@8	glycopepnew_HCDEThcDiTCIDpeptide_EThcDpd2	57.95	1	16869	39.7	4.4e-14	1	23511.8	HUMAN	Alpha-1-acid glycoprotein 1
[6]		P02763	91	952.425	4	-4.1	LVPVPITNATLDQITGK	Incorrect Mono 1Da@Neutral loss=52;HexNAc5Hex6+Cation:K@8=52	glycopepnew_HCDEThcDiTCIDpeptide_EThcDpd2	37.85	1	10258	26.3	5.1e-08	1	23511.8	HUMAN	Alpha-1-acid glycoprotein 1
[6-1]	30	P19652	74	1001.18	4	1.1	LVPVPITNATLDR	Incorrect Mono 1Da@Neutral loss;HexNAc5Hex5FucNeuAc2+Cation:K@8	glycopepnew_HCDEThcDiTCIDpeptide_EThcDpd2	42.333	1	11793	25.4	1.1e-07	1	23602.8	HUMAN	Alpha-1-acid glycoprotein 2
[6-1]	30	P19652	74	1096.46	4	0.84	LVPVPITNATLDR	Incorrect Mono 1Da@Neutral loss=21;HexNAc6Hex7NeuAc2+Cation:K@8=21	glycopepnew_HCDEThcDiTCIDpeptide_EThcDpd2	41.633	2	11551	24.1	1.8e-06	1	23602.8	HUMAN	Alpha-1-acid glycoprotein 2
[6-1]	30	P19652	74	995.686	4	-0.015	LVPVPITNATLDR	Incorrect Mono 1Da@Neutral loss=59;HexNAc5Hex6NeuAc2@8=59	glycopepnew_HCDEThcDiTCIDpeptide_EThcDpd2	41.833	1	11609	37	1.8e-10	1	23602.8	HUMAN	Alpha-1-acid glycoprotein 2
[12]		P08185	24	991.387	4	-3.7	MDPNAAYVNMSNHHR	Incorrect Mono 1Da@Neutral loss;HexNAc4Hex5NeuAc2@9	glycopepnew_HCDEThcDiTCIDpeptide_EThcDpd2	23.667	1	5551	32.9	1.5e-05	1	45141.3	HUMAN	Corticosteroid-binding globulin
[12]		P08185	24	995.385	4	-4.6	MDPNAAYVNMSNHHR	Incorrect Mono 1Da@Neutral loss;Oxidation@1=78;HexNAc4Hex5NeuAc2@9	glycopepnew_HCDEThcDiTCIDpeptide_EThcDpd2	21.1	1	4699	38.9	4.3e-09	1	45141.3	HUMAN	Corticosteroid-binding globulin
[12]		P08185	24	918.618	4	1.8	MDPNAAYVNMSNHHR	Incorrect Mono 1Da@Neutral loss=19;HexNAc4Hex4FucNeuAc&Oxidation@(9&10)||HexNAc4Hex5NeuAc@9	glycopepnew_HCDEThcDiTCIDpeptide_EThcDpd2	19.4	2	4112	12.3	9.2e-05	1	45141.3	HUMAN	Corticosteroid-binding globulin
[12]		P08185	24	995.64	4	-4	MDPNAAYVNMSNHHR	Incorrect Mono 1Da@Neutral loss=6;HexNAc4Hex6FucNeuAc@9=6	glycopepnew_HCDEThcDiTCIDpeptide_EThcDpd2	22.117	2	5043	11.6	0.00012	1	45141.3	HUMAN	Corticosteroid-binding globulin
[22]		O75882	8	1287.28	4	0.72	MPSQAPTGNFYPQPLLNSSMCLEDSR	Incorrect Mono 1Da@Neutral loss=8;HexNAc4Hex5NeuAc2@17=8	glycopepnew_HCDEThcDiTCIDpeptide_EThcDpd2	49.167	3	14049	29.5	2.7e-09	1	158538	HUMAN	Attractin
[3]		P00738	120	1035.99	4	2.6	MVSHHNLTTGATLINEQWLLTTAK	Incorrect Mono 1Da@Neutral loss;HexNAc4Hex4@6=10	glycopepnew_HCDEThcDiTCIDpeptide_EThcDpd2	32.683	1	8503	29.2	4.4e-10	1	45205.7	HUMAN	Haptoglobin
[3]		P00738	120	1149.52	4	-5.2	MVSHHNLTTGATLINEQWLLTTAK	Incorrect Mono 1Da@Neutral loss;HexNAc4Hex5Fuc2@6	glycopepnew_HCDEThcDiTCIDpeptide_EThcDpd2	60.75	1	17775	37.2	1.8e-12	1	45205.7	HUMAN	Haptoglobin
[3]		P00738	120	1159.01	4	-4.8	MVSHHNLTTGATLINEQWLLTTAK	Incorrect Mono 1Da@Neutral loss;HexNAc4Hex5Fuc2+Cation:K@6	glycopepnew_HCDEThcDiTCIDpeptide_EThcDpd2	36.167	1	9674	27.7	2.5e-09	1	45205.7	HUMAN	Haptoglobin
[3]		P00738	120	1055.25	5	-5	MVSHHNLTTGATLINEQWLLTTAK	Incorrect Mono 1Da@Neutral loss;HexNAc5Hex5FucNeuAc2+Cation:K@6	glycopepnew_HCDEThcDiTCIDpeptide_EThcDpd2	35.7	2	9525	14.4	1.6e-06	1	45205.7	HUMAN	Haptoglobin
[3]		P00738	120	1313.33	4	1.8	MVSHHNLTTGATLINEQWLLTTAK	Incorrect Mono 1Da@Neutral loss;HexNAc5Hex6NeuAc2@6=32	glycopepnew_HCDEThcDiTCIDpeptide_EThcDpd2	39.717	2	10895	41.3	1.8e-14	1	45205.7	HUMAN	Haptoglobin
[3]		P00738	120	1386.11	4	1.5	MVSHHNLTTGATLINEQWLLTTAK	Incorrect Mono 1Da@Neutral loss;HexNAc5Hex6NeuAc3@6||HexNAc6Hex9Fuc+Cation:K@6	glycopepnew_HCDEThcDiTCIDpeptide_EThcDpd2	47.55	1	13530	45.9	3.7e-16	1	45205.7	HUMAN	Haptoglobin
[3]		P00738	120	1395.6	4	1.6	MVSHHNLTTGATLINEQWLLTTAK	Incorrect Mono 1Da@Neutral loss;HexNAc5Hex6NeuAc3+Cation:K@6	glycopepnew_HCDEThcDiTCIDpeptide_EThcDpd2	43.933	1	12332	36.9	8.8e-14	1	45205.7	HUMAN	Haptoglobin
[3]		P00738	120	985.83	5	-4.3	MVSHHNLTTGATLINEQWLLTTAK	Incorrect Mono 1Da@Neutral loss;HexNAc6Hex6+Cation:K@6;Oxidation@18=29	glycopepnew_HCDEThcDiTCIDpeptide_EThcDpd2	41.167	1	11388	14.6	0.00017	1	45205.7	HUMAN	Haptoglobin
[3]		P00738	120	1228.04	4	-1	MVSHHNLTTGATLINEQWLLTTAK	Incorrect Mono 1Da@Neutral loss;HexNAc6Hex6+Cation:K@6=11	glycopepnew_HCDEThcDiTCIDpeptide_EThcDpd2	40.817	1	11262	13.1	9.7e-07	1	45205.7	HUMAN	Haptoglobin
[3]		P00738	120	1236.55	4	-7.1	MVSHHNLTTGATLINEQWLLTTAK	Incorrect Mono 1Da@Neutral loss;Oxidation@1=29;HexNAc5Hex4Fuc2NeuAc@6=29	glycopepnew_HCDEThcDiTCIDpeptide_EThcDpd2	39.033	1	10646	25.1	8.3e-08	1	45205.7	HUMAN	Haptoglobin
[3]		P00738	120	1222.05	4	1.7	MVSHHNLTTGATLINEQWLLTTAK	Incorrect Mono 1Da@Neutral loss=102;HexNAc4Hex5NeuAc2@6=102	glycopepnew_HCDEThcDiTCIDpeptide_EThcDpd2	77.3	1	23067	58.5	4.4e-20	1	45205.7	HUMAN	Haptoglobin
[3]		P00738	120	1317.33	4	1	MVSHHNLTTGATLINEQWLLTTAK	Incorrect Mono 1Da@Neutral loss=12;Oxidation@1=36;HexNAc5Hex6NeuAc2@6=12	glycopepnew_HCDEThcDiTCIDpeptide_EThcDpd2	39.033	2	10648	16.9	5.6e-07	1	45205.7	HUMAN	Haptoglobin
[3]		P00738	120	985.429	5	-1.6	MVSHHNLTTGATLINEQWLLTTAK	Incorrect Mono 1Da@Neutral loss=126;HexNAc4Hex5NeuAc2+Cation:K@6=51	glycopepnew_HCDEThcDiTCIDpeptide_EThcDpd2	39.883	1	10936	66.4	3.8e-19	1	45205.7	HUMAN	Haptoglobin
[3]		P00738	120	1157.27	4	-1.2	MVSHHNLTTGATLINEQWLLTTAK	Incorrect Mono 1Da@Neutral loss=13;HexNAc7Hex3+Cation:K@6=13	glycopepnew_HCDEThcDiTCIDpeptide_EThcDpd2	33.4	2	8746	28.1	4.7e-09	1	45205.7	HUMAN	Haptoglobin
[3]		P00738	120	1262.81	4	-0.86	MVSHHNLTTGATLINEQWLLTTAK	Incorrect Mono 1Da@Neutral loss=14;HexNAc4Hex5Fuc3NeuAc&Oxidation@(6&1)||HexNAc4Hex6Fuc2NeuAc@6||HexNAc9Hex3+Cation:K&Oxidation@(6&1)	glycopepnew_HCDEThcDiTCIDpeptide_EThcDpd2	39.55	2	10833	19.2	3e-07	1	45205.7	HUMAN	Haptoglobin
[3]		P00738	120	1268.04	4	2.3	MVSHHNLTTGATLINEQWLLTTAK	Incorrect Mono 1Da@Neutral loss=140;HexNAc2Hex12+Cation:K@6||HexNAc4Hex5FucNeuAc2+Cation:K@6	glycopepnew_HCDEThcDiTCIDpeptide_EThcDpd2	39.383	2	10777	43.3	2.4e-16	1	45205.7	HUMAN	Haptoglobin
[3]		P00738	120	927.21	5	-1.4	MVSHHNLTTGATLINEQWLLTTAK	Incorrect Mono 1Da@Neutral loss=17;HexNAc4Hex5NeuAc+Cation:K@6=17	glycopepnew_HCDEThcDiTCIDpeptide_EThcDpd2	37.567	1	10153	29.2	3.4e-11	1	45205.7	HUMAN	Haptoglobin
[3]		P00738	120	985.631	5	-3.8	MVSHHNLTTGATLINEQWLLTTAK	Incorrect Mono 1Da@Neutral loss=21;HexNAc4Hex5Fuc2NeuAc+Cation:K@6=21	glycopepnew_HCDEThcDiTCIDpeptide_EThcDpd2	40.417	1	11127	34.8	7.1e-11	1	45205.7	HUMAN	Haptoglobin
[3]		P00738	120	1246.04	4	-4.1	MVSHHNLTTGATLINEQWLLTTAK	Incorrect Mono 1Da@Neutral loss=21;HexNAc5Hex5FucNeuAc+Cation:K@6=10	glycopepnew_HCDEThcDiTCIDpeptide_EThcDpd2	41.3	1	11436	22.2	3.1e-07	1	45205.7	HUMAN	Haptoglobin
[3]		P00738	120	1313.59	4	-0.32	MVSHHNLTTGATLINEQWLLTTAK	Incorrect Mono 1Da@Neutral loss=54;HexNAc5Hex6Fuc2NeuAc@6=54	glycopepnew_HCDEThcDiTCIDpeptide_EThcDpd2	46.1	2	13066	23.1	2.1e-08	1	45205.7	HUMAN	Haptoglobin
[3]		P00738	120	1222.29	4	-6.8	MVSHHNLTTGATLINEQWLLTTAK	Incorrect Mono 1Da@Neutral loss=55;HexNAc4Hex5Fuc2NeuAc@6=55	glycopepnew_HCDEThcDiTCIDpeptide_EThcDpd2	80.433	1	24036	33	3.3e-12	1	45205.7	HUMAN	Haptoglobin
[3]		P00738	120	1226.05	4	2.4	MVSHHNLTTGATLINEQWLLTTAK	Incorrect Mono 1Da@Neutral loss=65;HexNAc4Hex5NeuAc2@6=65;Oxidation@18=65	glycopepnew_HCDEThcDiTCIDpeptide_EThcDpd2	37.15	1	10011	43	4.5e-13	1	45205.7	HUMAN	Haptoglobin
[3]		P00738	120	1322.82	4	-3	MVSHHNLTTGATLINEQWLLTTAK	Incorrect Mono 1Da@Neutral loss=65;HexNAc5Hex6NeuAc2+Cation:K@6=23	glycopepnew_HCDEThcDiTCIDpeptide_EThcDpd2	39.35	2	10766	39.4	4.9e-15	1	45205.7	HUMAN	Haptoglobin
[3]		P00738	120	1226.05	4	1	MVSHHNLTTGATLINEQWLLTTAK	Incorrect Mono 1Da@Neutral loss=66;Oxidation@1;HexNAc4Hex5NeuAc2@6=66	glycopepnew_HCDEThcDiTCIDpeptide_EThcDpd2	39.383	1	10775	57.5	8.5e-18	1	45205.7	HUMAN	Haptoglobin
[3]		P00738	120	1149.27	4	0.58	MVSHHNLTTGATLINEQWLLTTAK	Incorrect Mono 1Da@Neutral loss=97;HexNAc4Hex5NeuAc@6=38	glycopepnew_HCDEThcDiTCIDpeptide_EThcDpd2	59.533	1	17381	54.5	1.9e-18	1	45205.7	HUMAN	Haptoglobin
[15]		P01008	14	1112.19	4	2	NETYQDISELVYGAK	Incorrect Mono 1Da@Neutral loss;HexNAc6Hex9+Cation:K@1	glycopepnew_HCDEThcDiTCIDpeptide_EThcDpd2	61.1	1	17883	38.6	4.1e-10	1	52602.9	HUMAN	Antithrombin-III
[7]		P02790	44	819.906	5	-6.2	NGTGHGNSTHHGPEYMR	Incorrect Mono 1Da@Neutral loss;HexNAc4Hex5NeuAc2+Cation:K@7=22	glycopepnew_HCDEThcDiTCIDpeptide_EThcDpd2	14.683	1	2445	27.4	1.1e-05	1	51676.8	HUMAN	Hemopexin
[7]		P02790	44	1106.68	4	-7.8	NGTGHGNSTHHGPEYMR	Incorrect Mono 1Da@Neutral loss;HexNAc5Hex6Fuc2NeuAc@1|7	glycopepnew_HCDEThcDiTCIDpeptide_EThcDpd2	14.833	2	2499	27.7	2.3e-10	1	51676.8	HUMAN	Hemopexin
[7]		P02790	44	1061.65	4	-3.2	NGTGHGNSTHHGPEYMR	Incorrect Mono 1Da@Neutral loss;HexNAc6Hex7+Cation:K@1|7	glycopepnew_HCDEThcDiTCIDpeptide_EThcDpd2	16.133	2	2954	19.2	5.9e-06	1	51676.8	HUMAN	Hemopexin
[3]		P00738	120	1120.84	5	5.6	NLFLNHSENATAK	Incorrect Mono 1Da@Neutral loss;HexNAc8Hex9FucNeuAc3+Cation:K@5|9	glycopepnew_HCDEThcDiTCIDpeptide_EThcDpd2	26.733	1	6563	13.8	2.5e-05	1	45205.7	HUMAN	Haptoglobin
[41]		P05546	2	1096.44	4	1.1	NLSMPLLPADFHK	Incorrect Mono 1Da@Neutral loss;HexNAc5Hex6NeuAc3+Cation:K@1	glycopepnew_HCDEThcDiTCIDpeptide_EThcDpd2	50.35	1	14434	31.1	3.4e-12	1	57071.1	HUMAN	Heparin cofactor 2
[26]		P05155	7	808.319	5	-7.1	NPNATSSSSQDPESLQDRGEGK	Incorrect Mono 1Da@Neutral loss;HexNAc3Hex4FucNeuAc+Cation:K@3	glycopepnew_HCDEThcDiTCIDpeptide_EThcDpd2	55.233	1	16016	16.8	4.3e-07	1	55154.7	HUMAN	Plasma protease C1 inhibitor
[4]		P01023	96	1013.64	5	6.3	NQTLSLFFTVLQDVPVR	Incorrect Mono 1Da@Neutral loss;HexNAc6Hex5FucNeuAc3+Cation:K@1	glycopepnew_HCDEThcDiTCIDpeptide_EThcDpd2	77.383	2	23094	12.4	1.2e-05	1	163292	HUMAN	Alpha-2-macroglobulin
[11]		P01011	24	1149.27	4	-5	NVIFSPLSISTALAFLSLGAHN	Incorrect Mono 1Da@Neutral loss;HexNAc6Hex5Fuc2@22	glycopepnew_HCDEThcDiTCIDpeptide_EThcDpd2	76.867	2	22932	15.3	1.1e-05	1	47651.3	HUMAN	Alpha-1-antichymotrypsin
[11]		P01011	24	1232.73	5	-6.3	NVIFSPLSISTALAFLSLGAHNTTLT	Incorrect Mono 1Da@Neutral loss;HexNAc9Hex9Fuc+Cation:K@22	glycopepnew_HCDEThcDiTCIDpeptide_EThcDpd2	76.85	1	22928	20.8	1.9e-06	1	47651.3	HUMAN	Alpha-1-antichymotrypsin
[11]		P01011	24	1280.59	5	0.64	NVIFSPLSISTALAFLSLGAHNTTLTEILK	Incorrect Mono 1Da@Neutral loss;HexNAc6Hex7NeuAc3@22	glycopepnew_HCDEThcDiTCIDpeptide_EThcDpd2	76.733	1	22889	14.1	5.5e-06	1	47651.3	HUMAN	Alpha-1-antichymotrypsin
[11]		P01011	24	1105.53	5	-0.19	NVIFSPLSISTALAFLSLGAHNTTLTEILK	Incorrect Mono 1Da@Neutral loss=11;HexNAc4Hex5FucNeuAc2@22=11	glycopepnew_HCDEThcDiTCIDpeptide_EThcDpd2	69.433	2	20537	16.4	4.1e-05	1	47651.3	HUMAN	Alpha-1-antichymotrypsin
[2]		P01876	150	934.934	4	-1.1	PALEDLLLGSEANLTCTLTGLR	Incorrect Mono 1Da@Neutral loss;HexNAc2Hex6@13	glycopepnew_HCDEThcDiTCIDpeptide_EThcDpd2	52.3	1	15076	36.1	7e-09	2	37655	HUMAN	Immunoglobulin heavy constant alpha 1
[2]		P01876	150	1058.48	4	-0.27	PALEDLLLGSEANLTCTLTGLR	Incorrect Mono 1Da@Neutral loss;HexNAc3Hex6NeuAc@13	glycopepnew_HCDEThcDiTCIDpeptide_EThcDpd2	58.217	2	16963	35.3	6.9e-08	2	37655	HUMAN	Immunoglobulin heavy constant alpha 1
[2]		P01876	150	955.45	4	2.5	PALEDLLLGSEANLTCTLTGLR	Incorrect Mono 1Da@Neutral loss;HexNAc4Hex4@13	glycopepnew_HCDEThcDiTCIDpeptide_EThcDpd2	52.4	2	15104	42.2	7e-09	2	37655	HUMAN	Immunoglobulin heavy constant alpha 1
[2]		P01876	150	1074.23	4	3.4	PALEDLLLGSEANLTCTLTGLR	Incorrect Mono 1Da@Neutral loss;HexNAc4Hex4FucNeuAc+Cation:K@13	glycopepnew_HCDEThcDiTCIDpeptide_EThcDpd2	59.15	1	17260	32.4	7e-09	2	37655	HUMAN	Immunoglobulin heavy constant alpha 1
[2]		P01876	150	1327.62	3	4	PALEDLLLGSEANLTCTLTGLR	Incorrect Mono 1Da@Neutral loss;HexNAc4Hex5@13	glycopepnew_HCDEThcDiTCIDpeptide_EThcDpd2	58.133	1	16932	16	8.7e-05	2	37655	HUMAN	Immunoglobulin heavy constant alpha 1
[2]		P01876	150	1068.99	4	-0.97	PALEDLLLGSEANLTCTLTGLR	Incorrect Mono 1Da@Neutral loss;HexNAc4Hex5Fuc2@13	glycopepnew_HCDEThcDiTCIDpeptide_EThcDpd2	67.767	1	20002	29.9	1.7e-07	2	37655	HUMAN	Immunoglobulin heavy constant alpha 1
[2]		P01876	150	1078.22	4	-5.8	PALEDLLLGSEANLTCTLTGLR	Incorrect Mono 1Da@Neutral loss;HexNAc4Hex5NeuAc+Cation:K@13	glycopepnew_HCDEThcDiTCIDpeptide_EThcDpd2	61.017	1	17855	36.2	3.6e-11	2	37655	HUMAN	Immunoglobulin heavy constant alpha 1
[2]		P01876	150	1036.48	4	0.65	PALEDLLLGSEANLTCTLTGLR	Incorrect Mono 1Da@Neutral loss;HexNAc4Hex6@13	glycopepnew_HCDEThcDiTCIDpeptide_EThcDpd2	52.183	2	15033	24.6	7.3e-07	2	37655	HUMAN	Immunoglobulin heavy constant alpha 1
[2]		P01876	150	1119.76	4	-0.88	PALEDLLLGSEANLTCTLTGLR	Incorrect Mono 1Da@Neutral loss;HexNAc5Hex5Fuc2@13	glycopepnew_HCDEThcDiTCIDpeptide_EThcDpd2	65.483	2	19278	35.9	1.1e-09	2	37655	HUMAN	Immunoglobulin heavy constant alpha 1
[2]		P01876	150	1192.28	4	0.13	PALEDLLLGSEANLTCTLTGLR	Incorrect Mono 1Da@Neutral loss;HexNAc5Hex5NeuAc2@13	glycopepnew_HCDEThcDiTCIDpeptide_EThcDpd2	66.25	1	19529	18.6	1.6e-06	2	37655	HUMAN	Immunoglobulin heavy constant alpha 1
[2]		P01876	150	1098.99	4	1	PALEDLLLGSEANLTCTLTGLR	Incorrect Mono 1Da@Neutral loss;HexNAc6Hex3Fuc2+Cation:K@13	glycopepnew_HCDEThcDiTCIDpeptide_EThcDpd2	57.833	1	16834	25.3	5.4e-06	2	37655	HUMAN	Immunoglobulin heavy constant alpha 1
[2]		P01876	150	1119.5	4	-1.7	PALEDLLLGSEANLTCTLTGLR	Incorrect Mono 1Da@Neutral loss=20;HexNAc5Hex5NeuAc@13=20	glycopepnew_HCDEThcDiTCIDpeptide_EThcDpd2	60.95	1	17835	34.5	1.7e-12	2	37655	HUMAN	Immunoglobulin heavy constant alpha 1
[2]		P01876	150	1037.71	4	-0.96	PALEDLLLGSEANLTCTLTGLR	Incorrect Mono 1Da@Neutral loss=27;HexNAc4Hex4NeuAc+Cation:K@13=27	glycopepnew_HCDEThcDiTCIDpeptide_EThcDpd2	58.733	1	17126	21.2	6.1e-07	2	37655	HUMAN	Immunoglobulin heavy constant alpha 1
[2]		P01876	150	977.452	4	0.19	PALEDLLLGSEANLTCTLTGLR	Incorrect Mono 1Da@Neutral loss=31;HexNAc3Hex4NeuAc@13=31	glycopepnew_HCDEThcDiTCIDpeptide_EThcDpd2	58.717	1	17119	27.1	3.2e-07	2	37655	HUMAN	Immunoglobulin heavy constant alpha 1
[2]		P01876	150	1141.51	4	-0.87	PALEDLLLGSEANLTCTLTGLR	Incorrect Mono 1Da@Neutral loss=32;HexNAc4Hex5NeuAc2@13=32	glycopepnew_HCDEThcDiTCIDpeptide_EThcDpd2	66.983	2	19756	46.5	7.7e-10	2	37655	HUMAN	Immunoglobulin heavy constant alpha 1
[2]		P01876	150	1141.76	4	-1.6	PALEDLLLGSEANLTCTLTGLR	Incorrect Mono 1Da@Neutral loss=7;HexNAc4Hex5Fuc2NeuAc@13=7	glycopepnew_HCDEThcDiTCIDpeptide_EThcDpd2	71.3	1	21148	21.5	7.2e-07	2	37655	HUMAN	Immunoglobulin heavy constant alpha 1
[3]		P00738	120	894.163	5	0.48	PNYSQVDIGLIK	Incorrect Mono 1Da@Neutral loss;HexNAc6Hex7FucNeuAc2+Cation:K@2	glycopepnew_HCDEThcDiTCIDpeptide_EThcDpd2	39.433	1	10793	15.4	1.5e-05	1	45205.7	HUMAN	Haptoglobin
[6]		P02763	91	1395.28	4	-5.4	QCIYNTTYLNVQR	Incorrect Mono 1Da@Neutral loss;HexNAc7Hex7FucNeuAc4+Cation:K@5	glycopepnew_HCDEThcDiTCIDpeptide_EThcDpd2	59.967	1	17516	12.8	3.5e-05	1	23511.8	HUMAN	Alpha-1-acid glycoprotein 1
[6]		P02763	91	1227.49	4	0.46	QDQCIYNTTYLNVQR	Incorrect Mono 1Da@Neutral loss;Gln->pyro-Glu@1=37;HexNAc5Hex6FucNeuAc3@7=37	glycopepnew_HCDEThcDiTCIDpeptide_EThcDpd2	66.55	1	19623	20	2.2e-07	1	23511.8	HUMAN	Alpha-1-acid glycoprotein 1
[6]		P02763	91	1190.98	4	1.1	QDQCIYNTTYLNVQR	Incorrect Mono 1Da@Neutral loss;Gln->pyro-Glu@1=39;HexNAc5Hex6NeuAc3@7=39	glycopepnew_HCDEThcDiTCIDpeptide_EThcDpd2	67.15	2	19813	27.4	1.9e-09	1	23511.8	HUMAN	Alpha-1-acid glycoprotein 1
[6]		P02763	91	1241.23	4	-0.92	QDQCIYNTTYLNVQR	Incorrect Mono 1Da@Neutral loss;HexNAc5Hex6FucNeuAc3+Cation:K@7	glycopepnew_HCDEThcDiTCIDpeptide_EThcDpd2	45.867	1	12974	32.8	8.1e-07	1	23511.8	HUMAN	Alpha-1-acid glycoprotein 1
[6]		P02763	91	1204.72	4	-1.4	QDQCIYNTTYLNVQR	Incorrect Mono 1Da@Neutral loss;HexNAc5Hex6NeuAc3+Cation:K@7=52	glycopepnew_HCDEThcDiTCIDpeptide_EThcDpd2	46.85	1	13304	35.9	1.1e-09	1	23511.8	HUMAN	Alpha-1-acid glycoprotein 1
[6]		P02763	91	1213.74	4	-3.6	QDQCIYNTTYLNVQR	Incorrect Mono 1Da@Neutral loss;HexNAc6Hex7NeuAc2@7=55	glycopepnew_HCDEThcDiTCIDpeptide_EThcDpd2	37.883	2	10268	34.3	3.1e-12	1	23511.8	HUMAN	Alpha-1-acid glycoprotein 1
[6]		P02763	91	1359.29	4	2.7	QDQCIYNTTYLNVQR	Incorrect Mono 1Da@Neutral loss;HexNAc6Hex7NeuAc4@7	glycopepnew_HCDEThcDiTCIDpeptide_EThcDpd2	57.583	3	16758	28.2	2.4e-06	1	23511.8	HUMAN	Alpha-1-acid glycoprotein 1
[6]		P02763	91	1282.26	4	2.1	QDQCIYNTTYLNVQR	Incorrect Mono 1Da@Neutral loss=28;Gln->pyro-Glu@1=28;HexNAc6Hex7NeuAc3@7=28	glycopepnew_HCDEThcDiTCIDpeptide_EThcDpd2	65.667	2	19340	19.8	1e-05	1	23511.8	HUMAN	Alpha-1-acid glycoprotein 1
[5]		P02787	86	978.184	5	-6.7	QHLFGSNVTDCSGNFCLFR	Incorrect Mono 1Da@Neutral loss;Gln->pyro-Glu@1;HexNAc6Hex7NeuAc@7	glycopepnew_HCDEThcDiTCIDpeptide_EThcDpd2	37.433	2	10110	23.8	4.8e-09	1	77064.7	HUMAN	Serotransferrin
[1]		P01009	159	1188.99	4	-1.8	QLAHQSNSTNIFFSPVSIATAF	Incorrect Mono 1Da@Neutral loss=26;Gln->pyro-Glu@1;HexNAc2Hex12+Cation:K@7||HexNAc4Hex5FucNeuAc2+Cation:K@7	glycopepnew_HCDEThcDiTCIDpeptide_EThcDpd2	78.067	1	23310	15.7	2.4e-05	1	46736.9	HUMAN	Alpha-1-antitrypsin
[1]		P01009	159	1183.76	4	1.8	QLAHQSNSTNIFFSPVSIATAF	Incorrect Mono 1Da@Neutral loss=55;HexNAc4Hex5FucNeuAc2@7=37	glycopepnew_HCDEThcDiTCIDpeptide_EThcDpd2	61.45	2	18007	28	9e-08	1	46736.9	HUMAN	Alpha-1-antitrypsin
[1]		P01009	159	1142.99	4	-2.8	QLAHQSNSTNIFFSPVSIATAF	Incorrect Mono 1Da@Neutral loss=94;Gln->pyro-Glu@1=60;HexNAc4Hex5NeuAc2@7=60	glycopepnew_HCDEThcDiTCIDpeptide_EThcDpd2	78.133	1	23332	32.2	3e-12	1	46736.9	HUMAN	Alpha-1-antitrypsin
[1]		P01009	159	1243.77	4	-0.43	QLAHQSNSTNIFFSPVSIATAFAM	Incorrect Mono 1Da@Neutral loss=14;HexNAc2Hex12+Cation:K@7||HexNAc4Hex5FucNeuAc2+Cation:K@7	glycopepnew_HCDEThcDiTCIDpeptide_EThcDpd2	66.75	1	19680	13	1.4e-05	1	46736.9	HUMAN	Alpha-1-antitrypsin
[1]		P01009	159	1357.86	4	-4	QLAHQSNSTNIFFSPVSIATAFAMLSLGTK	Incorrect Mono 1Da@Neutral loss;Gln->pyro-Glu&HexNAc5Hex5FucNeuAc@(1&7)||HexNAc5Hex4NeuAc2@7	glycopepnew_HCDEThcDiTCIDpeptide_EThcDpd2	80.8	1	24151	11.4	4e-05	1	46736.9	HUMAN	Alpha-1-antitrypsin
[1]		P01009	159	1276.07	4	4.5	QLAHQSNSTNIFFSPVSIATAFAMLSLGTK	Incorrect Mono 1Da@Neutral loss;Gln->pyro-Glu@1;HexNAc4Hex4FucNeuAc+Cation:K@7	glycopepnew_HCDEThcDiTCIDpeptide_EThcDpd2	70.95	1	21033	48.8	1.9e-17	1	46736.9	HUMAN	Alpha-1-antitrypsin
[1]		P01009	159	1348.85	4	6.1	QLAHQSNSTNIFFSPVSIATAFAMLSLGTK	Incorrect Mono 1Da@Neutral loss;Gln->pyro-Glu@1;HexNAc4Hex4FucNeuAc2+Cation:K@7	glycopepnew_HCDEThcDiTCIDpeptide_EThcDpd2	80.583	1	24084	18.9	3.7e-08	1	46736.9	HUMAN	Alpha-1-antitrypsin
[1]		P01009	159	1353.85	4	-6.8	QLAHQSNSTNIFFSPVSIATAFAMLSLGTK	Incorrect Mono 1Da@Neutral loss;Gln->pyro-Glu@1;HexNAc5Hex4Fuc2NeuAc@7	glycopepnew_HCDEThcDiTCIDpeptide_EThcDpd2	77.2	2	23036	19.3	4.5e-07	1	46736.9	HUMAN	Alpha-1-antitrypsin
[1]		P01009	159	1270.83	4	-0.49	QLAHQSNSTNIFFSPVSIATAFAMLSLGTK	Incorrect Mono 1Da@Neutral loss;Gln->pyro-Glu@1=35;HexNAc4Hex5Fuc2@7=35	glycopepnew_HCDEThcDiTCIDpeptide_EThcDpd2	70.667	2	20937	28.9	7.1e-09	1	46736.9	HUMAN	Alpha-1-antitrypsin
[1]		P01009	159	1217.12	5	-4.9	QLAHQSNSTNIFFSPVSIATAFAMLSLGTK	Incorrect Mono 1Da@Neutral loss;HexNAc5Hex6NeuAc3+Cation:K@7=71	glycopepnew_HCDEThcDiTCIDpeptide_EThcDpd2	75.95	1	22641	45.6	1.2e-14	1	46736.9	HUMAN	Alpha-1-antitrypsin
[1]		P01009	159	1085.88	5	-2.2	QLAHQSNSTNIFFSPVSIATAFAMLSLGTK	Incorrect Mono 1Da@Neutral loss=138;HexNAc4Hex5NeuAc2+Cation:K@7=91	glycopepnew_HCDEThcDiTCIDpeptide_EThcDpd2	68.183	2	20131	70.2	7.5e-24	1	46736.9	HUMAN	Alpha-1-antitrypsin
[1]		P01009	159	1371.35	4	-0.42	QLAHQSNSTNIFFSPVSIATAFAMLSLGTK	Incorrect Mono 1Da@Neutral loss=20;HexNAc5Hex4NeuAc2+Cation:K@7=20;Oxidation@24=20	glycopepnew_HCDEThcDiTCIDpeptide_EThcDpd2	56.567	1	16439	17.8	6.7e-09	1	46736.9	HUMAN	Alpha-1-antitrypsin
[1]		P01009	159	1078.29	5	0.66	QLAHQSNSTNIFFSPVSIATAFAMLSLGTK	Incorrect Mono 1Da@Neutral loss=28;HexNAc4Hex5NeuAc2@7=28	glycopepnew_HCDEThcDiTCIDpeptide_EThcDpd2	68.633	1	20275	24.8	2.2e-07	1	46736.9	HUMAN	Alpha-1-antitrypsin
[1]		P01009	159	1385.87	4	5.8	QLAHQSNSTNIFFSPVSIATAFAMLSLGTK	Incorrect Mono 1Da@Neutral loss=30;Gln->pyro-Glu@1=15;HexNAc6Hex6Fuc+Cation:K@7=15	glycopepnew_HCDEThcDiTCIDpeptide_EThcDpd2	80.083	2	23941	30.5	6.8e-10	1	46736.9	HUMAN	Alpha-1-antitrypsin
[1]		P01009	159	1311.35	4	-1.4	QLAHQSNSTNIFFSPVSIATAFAMLSLGTK	Incorrect Mono 1Da@Neutral loss=34;HexNAc4Hex5FucNeuAc@7=34	glycopepnew_HCDEThcDiTCIDpeptide_EThcDpd2	61.733	2	18098	27	9e-10	1	46736.9	HUMAN	Alpha-1-antitrypsin
[1]		P01009	159	1367.34	4	-6.6	QLAHQSNSTNIFFSPVSIATAFAMLSLGTK	Incorrect Mono 1Da@Neutral loss=34;HexNAc5Hex4NeuAc2+Cation:K@7=12	glycopepnew_HCDEThcDiTCIDpeptide_EThcDpd2	64.8	1	19067	23.1	1.7e-09	1	46736.9	HUMAN	Alpha-1-antitrypsin
[1]		P01009	159	1274.84	4	0.6	QLAHQSNSTNIFFSPVSIATAFAMLSLGTK	Incorrect Mono 1Da@Neutral loss=36;HexNAc4Hex5NeuAc@7=36	glycopepnew_HCDEThcDiTCIDpeptide_EThcDpd2	62.167	1	18241	21.6	2.2e-09	1	46736.9	HUMAN	Alpha-1-antitrypsin
[1]		P01009	159	1351.61	4	-0.064	QLAHQSNSTNIFFSPVSIATAFAMLSLGTK	Incorrect Mono 1Da@Neutral loss=36;HexNAc4Hex5NeuAc2@7=36;Oxidation@24=50	glycopepnew_HCDEThcDiTCIDpeptide_EThcDpd2	65.333	1	19233	42	6.8e-12	1	46736.9	HUMAN	Alpha-1-antitrypsin
[1]		P01009	159	1379.87	4	0.15	QLAHQSNSTNIFFSPVSIATAFAMLSLGTK	Incorrect Mono 1Da@Neutral loss=39;Gln->pyro-Glu@1=50;HexNAc4Hex5FucNeuAc2@7=39	glycopepnew_HCDEThcDiTCIDpeptide_EThcDpd2	81	1	24214	33.6	2.9e-15	1	46736.9	HUMAN	Alpha-1-antitrypsin
[1]		P01009	159	1284.32	4	-0.98	QLAHQSNSTNIFFSPVSIATAFAMLSLGTK	Incorrect Mono 1Da@Neutral loss=39;HexNAc4Hex5NeuAc+Cation:K@7=39	glycopepnew_HCDEThcDiTCIDpeptide_EThcDpd2	61.833	1	18125	43.8	7.6e-14	1	46736.9	HUMAN	Alpha-1-antitrypsin
[1]		P01009	159	1352.84	4	-1.1	QLAHQSNSTNIFFSPVSIATAFAMLSLGTK	Incorrect Mono 1Da@Neutral loss=47;Gln->pyro-Glu@1=98;HexNAc4Hex5NeuAc2+Cation:K@7=47	glycopepnew_HCDEThcDiTCIDpeptide_EThcDpd2	79.933	1	23892	36.4	5.7e-17	1	46736.9	HUMAN	Alpha-1-antitrypsin
[1]		P01009	159	1316.58	4	0.22	QLAHQSNSTNIFFSPVSIATAFAMLSLGTK	Incorrect Mono 1Da@Neutral loss=49;Gln->pyro-Glu@1=36;HexNAc4Hex5FucNeuAc+Cation:K@7=36	glycopepnew_HCDEThcDiTCIDpeptide_EThcDpd2	70.783	2	20977	27.6	2e-11	1	46736.9	HUMAN	Alpha-1-antitrypsin
[1]		P01009	159	1384.37	4	-1.1	QLAHQSNSTNIFFSPVSIATAFAMLSLGTK	Incorrect Mono 1Da@Neutral loss=8;HexNAc4Hex5Fuc3NeuAc@7||HexNAc9Hex3+Cation:K@7	glycopepnew_HCDEThcDiTCIDpeptide_EThcDpd2	68.5	1	20230	41.5	3.5e-11	1	46736.9	HUMAN	Alpha-1-antitrypsin
[1]		P01009	159	1343.35	4	0.75	QLAHQSNSTNIFFSPVSIATAFAMLSLGTK	Incorrect Mono 1Da@Neutral loss=9;Gln->pyro-Glu@1=35;HexNAc4Hex5NeuAc2@7=9	glycopepnew_HCDEThcDiTCIDpeptide_EThcDpd2	79.917	2	23887	25.4	1e-09	1	46736.9	HUMAN	Alpha-1-antitrypsin
[6-1]	30	P19652	74	1370.27	4	-0.56	QNQCFYNSSYLNVQR	Incorrect Mono 1Da@Neutral loss;HexNAc6Hex7Fuc2NeuAc3+Cation:K@7	glycopepnew_HCDEThcDiTCIDpeptide_EThcDpd2	56.217	1	16324	14.9	2.9e-06	1	23602.8	HUMAN	Alpha-1-acid glycoprotein 2
[6-1]	30	P19652	74	1251.5	4	0.039	QNQCFYNSSYLNVQR	Incorrect Mono 1Da@Neutral loss;HexNAc6Hex7FucNeuAc2@7	glycopepnew_HCDEThcDiTCIDpeptide_EThcDpd2	36.733	3	9875	21.5	1.1e-08	1	23602.8	HUMAN	Alpha-1-acid glycoprotein 2
[6-1]	30	P19652	74	1360.53	4	-1.7	QNQCFYNSSYLNVQR	Incorrect Mono 1Da@Neutral loss;HexNAc6Hex7NeuAc4@7	glycopepnew_HCDEThcDiTCIDpeptide_EThcDpd2	56.2	1	16322	24.8	4e-09	1	23602.8	HUMAN	Alpha-1-acid glycoprotein 2
[6-1]	30	P19652	74	1370.02	4	-1.3	QNQCFYNSSYLNVQR	Incorrect Mono 1Da@Neutral loss=9;HexNAc6Hex7NeuAc4+Cation:K@7=9	glycopepnew_HCDEThcDiTCIDpeptide_EThcDpd2	57.183	2	16637	27.6	1.8e-11	1	23602.8	HUMAN	Alpha-1-acid glycoprotein 2
[5]		P02787	86	1046.4	4	-0.97	QQQHLFGSNVTDCSGNF	Incorrect Mono 1Da@Neutral loss;HexNAc4Hex5NeuAc2+Cation:K@9	glycopepnew_HCDEThcDiTCIDpeptide_EThcDpd2	38.367	2	10427	23.2	2.1e-09	1	77064.7	HUMAN	Serotransferrin
[5]		P02787	86	1354.78	4	0.53	QQQHLFGSNVTDCSGNFCL	Incorrect Mono 1Da@Neutral loss;HexNAc10Hex7+Cation:K@9	glycopepnew_HCDEThcDiTCIDpeptide_EThcDpd2	48.117	1	13708	15.1	0.00014	1	77064.7	HUMAN	Serotransferrin
[5]		P02787	86	1350.27	4	-1.1	QQQHLFGSNVTDCSGNFCLFR	Incorrect Mono 1Da@Neutral loss;Gln->pyro-Glu@1;HexNAc5Hex6NeuAc3+Cation:K@9	glycopepnew_HCDEThcDiTCIDpeptide_EThcDpd2	60.6	2	17732	10.1	6.2e-05	1	77064.7	HUMAN	Serotransferrin
[5]		P02787	86	1381.55	4	-2.4	QQQHLFGSNVTDCSGNFCLFR	Incorrect Mono 1Da@Neutral loss;HexNAc5Hex6FucNeuAc3@9	glycopepnew_HCDEThcDiTCIDpeptide_EThcDpd2	47.533	2	13525	17.2	1.4e-07	1	77064.7	HUMAN	Serotransferrin
[5]		P02787	86	1391.03	4	-4.2	QQQHLFGSNVTDCSGNFCLFR	Incorrect Mono 1Da@Neutral loss;HexNAc5Hex6FucNeuAc3+Cation:K@9	glycopepnew_HCDEThcDiTCIDpeptide_EThcDpd2	47.783	2	13609	33.6	7.3e-11	1	77064.7	HUMAN	Serotransferrin
[5]		P02787	86	1176.72	4	-1.1	QQQHLFGSNVTDCSGNFCLFR	Incorrect Mono 1Da@Neutral loss=14;Gln->pyro-Glu@1=81;HexNAc4Hex5NeuAc2@9=14	glycopepnew_HCDEThcDiTCIDpeptide_EThcDpd2	51.65	3	14866	41.2	1.3e-12	1	77064.7	HUMAN	Serotransferrin
[5]		P02787	86	1217.49	4	-1.6	QQQHLFGSNVTDCSGNFCLFR	Incorrect Mono 1Da@Neutral loss=15;HexNAc4Hex5FucNeuAc2@9=15	glycopepnew_HCDEThcDiTCIDpeptide_EThcDpd2	42.35	2	11797	33.3	1.1e-08	1	77064.7	HUMAN	Serotransferrin
[5]		P02787	86	1108.21	4	2.2	QQQHLFGSNVTDCSGNFCLFR	Incorrect Mono 1Da@Neutral loss=18;HexNAc4Hex5NeuAc@9=18	glycopepnew_HCDEThcDiTCIDpeptide_EThcDpd2	38.467	1	10466	36.1	1.8e-10	1	77064.7	HUMAN	Serotransferrin
[5]		P02787	86	1199.49	4	0.096	QQQHLFGSNVTDCSGNFCLFR	Incorrect Mono 1Da@Neutral loss=29;HexNAc5Hex6NeuAc@9=29	glycopepnew_HCDEThcDiTCIDpeptide_EThcDpd2	37.35	2	10077	37.7	5.7e-11	1	77064.7	HUMAN	Serotransferrin
[5]		P02787	86	1180.98	4	1.4	QQQHLFGSNVTDCSGNFCLFR	Incorrect Mono 1Da@Neutral loss=38;HexNAc4Hex5NeuAc2@9=38	glycopepnew_HCDEThcDiTCIDpeptide_EThcDpd2	36.4	1	9754	42	2.6e-14	1	77064.7	HUMAN	Serotransferrin
[5]		P02787	86	894.357	5	-1.2	QQQHLFGSNVTDCSGNFCLFR	Incorrect Mono 1Da@Neutral loss=65;HexNAc4Hex5NeuAc+Cation:K@9=65	glycopepnew_HCDEThcDiTCIDpeptide_EThcDpd2	37.833	1	10256	45.2	2.6e-14	1	77064.7	HUMAN	Serotransferrin
[5]		P02787	86	967.385	5	0.44	QQQHLFGSNVTDCSGNFCLFR	Incorrect Mono 1Da@Neutral loss=80;HexNAc5Hex6NeuAc+Cation:K@9=80	glycopepnew_HCDEThcDiTCIDpeptide_EThcDpd2	37.267	1	10048	43.2	1.9e-15	1	77064.7	HUMAN	Serotransferrin
[5]		P02787	86	1346.03	4	0.42	QQQHLFGSNVTDCSGNFCLFRSE	Incorrect Mono 1Da@Neutral loss=13;Gln->pyro-Glu@1;HexNAc6Hex6FucNeuAc+Cation:K@9=13	glycopepnew_HCDEThcDiTCIDpeptide_EThcDpd2	59.3	1	17312	16	8.6e-05	1	77064.7	HUMAN	Serotransferrin
[1]		P01009	159	1203.29	4	-3	QSNSTNIFFSPVSIATAFAMLSLGTK	Incorrect Mono 1Da@Neutral loss;HexNAc4Hex6Fuc2@3=72	glycopepnew_HCDEThcDiTCIDpeptide_EThcDpd2	80.067	2	23934	29.4	2e-09	1	46736.9	HUMAN	Alpha-1-antitrypsin
[1]		P01009	159	1032.45	5	-6.8	QSNSTNIFFSPVSIATAFAMLSLGTK	Incorrect Mono 1Da@Neutral loss;HexNAc5Hex6FucNeuAc@3	glycopepnew_HCDEThcDiTCIDpeptide_EThcDpd2	61.617	1	18061	29.2	5.4e-08	1	46736.9	HUMAN	Alpha-1-antitrypsin
[1]		P01009	159	1348.57	4	-7.9	QSNSTNIFFSPVSIATAFAMLSLGTK	Incorrect Mono 1Da@Neutral loss;HexNAc5Hex9Fuc+Cation:K@3	glycopepnew_HCDEThcDiTCIDpeptide_EThcDpd2	81.15	1	24255	18.7	4.3e-06	1	46736.9	HUMAN	Alpha-1-antitrypsin
[1]		P01009	159	1235.3	4	2.8	QSNSTNIFFSPVSIATAFAMLSLGTK	Incorrect Mono 1Da@Neutral loss=16;Gln->pyro-Glu&HexNAc4Hex6FucNeuAc@(1&3)||HexNAc4Hex5NeuAc2@3	glycopepnew_HCDEThcDiTCIDpeptide_EThcDpd2	79.617	1	23795	26.3	1.4e-06	1	46736.9	HUMAN	Alpha-1-antitrypsin
[1]		P01009	159	1239.3	4	1.6	QSNSTNIFFSPVSIATAFAMLSLGTK	Incorrect Mono 1Da@Neutral loss=54;HexNAc4Hex5NeuAc2@3=54;Oxidation@20=55	glycopepnew_HCDEThcDiTCIDpeptide_EThcDpd2	75.8	2	22593	13	2.3e-08	1	46736.9	HUMAN	Alpha-1-antitrypsin
[1]		P01009	159	1281.3	4	1	QSNSTNIFFSPVSIATAFAMLSLGTK	Incorrect Mono 1Da@Neutral loss=57;Gln->pyro-Glu&HexNAc4Hex6Fuc2NeuAc+Cation:K@(1&3)||HexNAc2Hex12+Cation:K@3||HexNAc4Hex5FucNeuAc2+Cation:K@3	glycopepnew_HCDEThcDiTCIDpeptide_EThcDpd2	79.45	1	23744	41.9	5.4e-13	1	46736.9	HUMAN	Alpha-1-antitrypsin
[16]		P04217	15	1044.75	6	-2	REGDHEFLEVPEAQEDVEATFPVHQPGN	Incorrect Mono 1Da@Neutral loss;HexNAc6Hex5FucNeuAc3+Cation:K@28	glycopepnew_HCDEThcDiTCIDpeptide_EThcDpd2	38.4	1	10441	29	1.6e-07	1	54254	HUMAN	Alpha-1B-glycoprotein
[16]		P04217	15	1182.5	5	1.5	REGDHEFLEVPEAQEDVEATFPVHQPGNYSC	Incorrect Mono 1Da@Neutral loss;HexNAc6Hex5Fuc2@28	glycopepnew_HCDEThcDiTCIDpeptide_EThcDpd2	35.583	1	9481	40.6	9.3e-14	1	54254	HUMAN	Alpha-1B-glycoprotein
[16]		P04217	15	1040.42	6	-4.1	REGDHEFLEVPEAQEDVEATFPVHQPGNYSCSYR	Incorrect Mono 1Da@Neutral loss=50;HexNAc4Hex5Fuc2NeuAc+Cation:K@28=50	glycopepnew_HCDEThcDiTCIDpeptide_EThcDpd2	38.45	1	10460	44.5	1.4e-15	1	54254	HUMAN	Alpha-1B-glycoprotein
[1]		P01009	159	1117.3	5	-5.5	RQLAHQSNSTNIFFSPVSIATAFAMLSLGTK	Incorrect Mono 1Da@Neutral loss=38;HexNAc4Hex5Fuc2NeuAc+Cation:K@8=38	glycopepnew_HCDEThcDiTCIDpeptide_EThcDpd2	60.717	1	17766	25.3	1e-09	1	46736.9	HUMAN	Alpha-1-antitrypsin
[3]		P00738	120	1221.55	4	-0.031	SHHNLTTGATLINEQWLLTTAK	Incorrect Mono 1Da@Neutral loss;HexNAc6Hex3FucNeuAc2@4	glycopepnew_HCDEThcDiTCIDpeptide_EThcDpd2	67.8	2	20014	15.4	2.9e-05	1	45205.7	HUMAN	Haptoglobin
[3]		P00738	120	1391.86	4	2.4	SHHNLTTGATLINEQWLLTTAK	Incorrect Mono 1Da@Neutral loss;HexNAc6Hex9FucNeuAc@4	glycopepnew_HCDEThcDiTCIDpeptide_EThcDpd2	43.967	1	12342	19.9	5.8e-06	1	45205.7	HUMAN	Haptoglobin
[4]		P01023	96	901.626	4	-0.39	SINTTNVMGTSLTVR	Incorrect Mono 1Da@Neutral loss=42;HexNAc5Hex4NeuAc+Cation:K@3=42;Oxidation@8=42	glycopepnew_HCDEThcDiTCIDpeptide_EThcDpd2	21.233	1	4746	20.1	4.1e-05	1	163292	HUMAN	Alpha-2-macroglobulin
[4]		P01023	96	887.37	4	-1.1	SINTTNVMGTSLTVR	Incorrect Mono 1Da@Neutral loss=90;HexNAc4Hex5NeuAc+Cation:K@3=43	glycopepnew_HCDEThcDiTCIDpeptide_EThcDpd2	34.4	2	9084	45.4	1.3e-12	1	163292	HUMAN	Alpha-2-macroglobulin
[34]		P05156	4	1240.77	4	-1.1	SIPACVPWSPYLFQPNDTCIVSGWGR	Incorrect Mono 1Da@Neutral loss=33;HexNAc4Hex5NeuAc+Cation:K@16=33	glycopepnew_HCDEThcDiTCIDpeptide_EThcDpd2	54.75	1	15863	36.4	1.5e-11	1	65751	HUMAN	Complement factor I
[2-1]	33	P01877	119	1317.79	5	-1.6	SLDSTPQDGNVVVACLVQGFFPQEPLSVTWSESGQNVTAR	Incorrect Mono 1Da@Neutral loss;HexNAc5Hex5Fuc3@36	glycopepnew_HCDEThcDiTCIDpeptide_EThcDpd2	61	1	17853	38.4	4.5e-09	1	36591.7	HUMAN	Immunoglobulin heavy constant alpha 2
[4]		P01023	96	1158.52	4	-0.56	SLGNVNFTVSAEALESQELCGTEVPSVPEHGR	Incorrect Mono 1Da@Neutral loss;HexNAc2Hex5@6	glycopepnew_HCDEThcDiTCIDpeptide_EThcDpd2	40.05	2	10999	40	1.8e-08	1	163292	HUMAN	Alpha-2-macroglobulin
[4]		P01023	96	934.61	5	2.1	SLGNVNFTVSAEALESQELCGTEVPSVPEHGR	Incorrect Mono 1Da@Neutral loss;HexNAc2Hex5+Cation:K@6	glycopepnew_HCDEThcDiTCIDpeptide_EThcDpd2	50.567	1	14508	49.6	4.4e-17	1	163292	HUMAN	Alpha-2-macroglobulin
[4]		P01023	96	1209.29	4	-0.99	SLGNVNFTVSAEALESQELCGTEVPSVPEHGR	Incorrect Mono 1Da@Neutral loss;HexNAc3Hex5@6	glycopepnew_HCDEThcDiTCIDpeptide_EThcDpd2	39.25	1	10724	28.5	3.9e-06	1	163292	HUMAN	Alpha-2-macroglobulin
[4]		P01023	96	1033.44	5	-2	SLGNVNFTVSAEALESQELCGTEVPSVPEHGR	Incorrect Mono 1Da@Neutral loss;HexNAc3Hex5NeuAc+Cation:K@6	glycopepnew_HCDEThcDiTCIDpeptide_EThcDpd2	42.883	1	11980	57.2	1.3e-19	1	163292	HUMAN	Alpha-2-macroglobulin
[4]		P01023	96	1065.85	5	-3	SLGNVNFTVSAEALESQELCGTEVPSVPEHGR	Incorrect Mono 1Da@Neutral loss;HexNAc3Hex6NeuAc+Cation:K@6	glycopepnew_HCDEThcDiTCIDpeptide_EThcDpd2	42.85	2	11963	51.6	1.1e-16	1	163292	HUMAN	Alpha-2-macroglobulin
[4]		P01023	96	1074.26	5	-4.2	SLGNVNFTVSAEALESQELCGTEVPSVPEHGR	Incorrect Mono 1Da@Neutral loss;HexNAc4Hex5Fuc2+Cation:K@6	glycopepnew_HCDEThcDiTCIDpeptide_EThcDpd2	44.267	1	12449	40.6	5.8e-14	1	163292	HUMAN	Alpha-2-macroglobulin
[4]		P01023	96	1332.83	4	-0.26	SLGNVNFTVSAEALESQELCGTEVPSVPEHGR	Incorrect Mono 1Da@Neutral loss=20;HexNAc4Hex5NeuAc@6=20	glycopepnew_HCDEThcDiTCIDpeptide_EThcDpd2	42.667	2	11897	23.8	3.7e-05	1	163292	HUMAN	Alpha-2-macroglobulin
[4]		P01023	96	1074.06	5	-1.5	SLGNVNFTVSAEALESQELCGTEVPSVPEHGR	Incorrect Mono 1Da@Neutral loss=60;HexNAc4Hex5NeuAc+Cation:K@6=60	glycopepnew_HCDEThcDiTCIDpeptide_EThcDpd2	42.75	2	11924	57	1.1e-19	1	163292	HUMAN	Alpha-2-macroglobulin
[15]		P01008	14	1096.72	4	0.6	SLTFNETYQDISELVYGAK	Incorrect Mono 1Da@Neutral loss=32;HexNAc4Hex5NeuAc2@5=32	glycopepnew_HCDEThcDiTCIDpeptide_EThcDpd2	61.433	1	18000	36.4	2.9e-09	1	52602.9	HUMAN	Antithrombin-III
[15]		P01008	14	1096.97	4	-3	SLTFNETYQDISELVYGAK	Incorrect Mono 1Da@Neutral loss=33;HexNAc4Hex5Fuc2NeuAc@5=33	glycopepnew_HCDEThcDiTCIDpeptide_EThcDpd2	61.317	1	17959	29.1	1.6e-07	1	52602.9	HUMAN	Antithrombin-III
[15]		P01008	14	1023.94	4	0.45	SLTFNETYQDISELVYGAK	Incorrect Mono 1Da@Neutral loss=43;HexNAc4Hex5NeuAc@5=43	glycopepnew_HCDEThcDiTCIDpeptide_EThcDpd2	52.767	1	15221	25.2	3e-07	1	52602.9	HUMAN	Antithrombin-III
[1]		P01009	159	1094.07	5	2.6	SNSTNIFFSPVSIATAFAMLSLGTK	Incorrect Mono 1Da@Neutral loss;HexNAc5Hex6NeuAc3@2||HexNAc6Hex9Fuc+Cation:K@2	glycopepnew_HCDEThcDiTCIDpeptide_EThcDpd2	64.95	1	19111	16.8	0.00015	1	46736.9	HUMAN	Alpha-1-antitrypsin
[1]		P01009	159	1212.77	4	-2.7	SNSTNIFFSPVSIATAFAMLSLGTK	Incorrect Mono 1Da@Neutral loss=27;HexNAc4Hex5NeuAc2+Cation:K@2=27	glycopepnew_HCDEThcDiTCIDpeptide_EThcDpd2	80.117	1	23954	16.2	1.8e-07	1	46736.9	HUMAN	Alpha-1-antitrypsin
[26]		P05155	7	944.39	5	3.4	SSNPNATSSSSQDPESLQDRGEGK	Incorrect Mono 1Da@Neutral loss;HexNAc4Hex7Fuc2@5	glycopepnew_HCDEThcDiTCIDpeptide_EThcDpd2	56.983	1	16571	13.8	7.9e-05	1	55154.7	HUMAN	Plasma protease C1 inhibitor
[1]		P01009	159	1273.56	4	-2.7	SSWVLLMKYLGNATAIFFLPDEGK	Incorrect Mono 1Da@Neutral loss=11;HexNAc4Hex5Fuc3NeuAc+Cation:K@12=11	glycopepnew_HCDEThcDiTCIDpeptide_EThcDpd2	65.833	2	19395	13.5	0.00014	1	46736.9	HUMAN	Alpha-1-antitrypsin
[13]		P01871	15	800.926	5	-0.6	STGKPTLYNVSLVMSDTAGTC	Incorrect Mono 1Da@Neutral loss;HexNAc3Hex7+Cation:K@9;Oxidation@14	glycopepnew_HCDEThcDiTCIDpeptide_EThcDpd2	24.883	1	5964	16	9.9e-07	1	49440.2	HUMAN	Immunoglobulin heavy constant mu
[6]		P02763	91	1232.76	4	-2	SVQEIQATFFYFTPNK	Incorrect Mono 1Da@Neutral loss;HexNAc5Hex6FucNeuAc3@15	glycopepnew_HCDEThcDiTCIDpeptide_EThcDpd2	64.2	1	18870	25	8.1e-09	2	23511.8	HUMAN	Alpha-1-acid glycoprotein 1
[6]		P02763	91	1242.24	4	-3.3	SVQEIQATFFYFTPNK	Incorrect Mono 1Da@Neutral loss;HexNAc5Hex6FucNeuAc3+Cation:K@15	glycopepnew_HCDEThcDiTCIDpeptide_EThcDpd2	62.583	1	18372	22.3	1.1e-07	2	23511.8	HUMAN	Alpha-1-acid glycoprotein 1
[6]		P02763	91	1205.73	4	-2.5	SVQEIQATFFYFTPNK	Incorrect Mono 1Da@Neutral loss;HexNAc5Hex6NeuAc3+Cation:K@15	glycopepnew_HCDEThcDiTCIDpeptide_EThcDpd2	62.783	2	18437	31.2	8.1e-11	2	23511.8	HUMAN	Alpha-1-acid glycoprotein 1
[6]		P02763	91	1038.01	5	-6.3	SVQEIQATFFYFTPNK	Incorrect Mono 1Da@Neutral loss;HexNAc6Hex7Fuc2NeuAc2+Cation:K@15	glycopepnew_HCDEThcDiTCIDpeptide_EThcDpd2	63.117	1	18536	12.6	8.1e-06	2	23511.8	HUMAN	Alpha-1-acid glycoprotein 1
[6]		P02763	91	1370.04	4	-3.2	SVQEIQATFFYFTPNK	Incorrect Mono 1Da@Neutral loss;HexNAc6Hex7Fuc2NeuAc3+Cation:K@15	glycopepnew_HCDEThcDiTCIDpeptide_EThcDpd2	82.05	1	24510	16.7	4.5e-06	2	23511.8	HUMAN	Alpha-1-acid glycoprotein 1
[6]		P02763	91	1287.52	4	-3.4	SVQEIQATFFYFTPNK	Incorrect Mono 1Da@Neutral loss;HexNAc6Hex7NeuAc3@15	glycopepnew_HCDEThcDiTCIDpeptide_EThcDpd2	64.75	2	19051	19	1.4e-06	2	23511.8	HUMAN	Alpha-1-acid glycoprotein 1
[6]		P02763	91	1360.3	4	-1.2	SVQEIQATFFYFTPNK	Incorrect Mono 1Da@Neutral loss;HexNAc6Hex7NeuAc4@15	glycopepnew_HCDEThcDiTCIDpeptide_EThcDpd2	84.117	1	25062	13	4.3e-06	2	23511.8	HUMAN	Alpha-1-acid glycoprotein 1
[6]		P02763	91	1030.62	5	-7.3	SVQEIQATFFYFTPNK	Incorrect Mono 1Da@Neutral loss=17;HexNAc6Hex7Fuc4NeuAc@15=17	glycopepnew_HCDEThcDiTCIDpeptide_EThcDpd2	63	1	18492	21.6	6.8e-06	2	23511.8	HUMAN	Alpha-1-acid glycoprotein 1
[6]		P02763	91	1297.02	4	-1.3	SVQEIQATFFYFTPNK	Incorrect Mono 1Da@Neutral loss=6;HexNAc6Hex7NeuAc3+Cation:K@15=6	glycopepnew_HCDEThcDiTCIDpeptide_EThcDpd2	65.267	1	19212	23.8	1.3e-08	2	23511.8	HUMAN	Alpha-1-acid glycoprotein 1
[6]		P02763	91	1201.49	4	1.2	SVQEIQATFFYFTPNKTED	Incorrect Mono 1Da@Neutral loss;HexNAc6Hex7Fuc+Cation:K@15	glycopepnew_HCDEThcDiTCIDpeptide_EThcDpd2	63.167	1	18547	33.1	5.5e-11	2	23511.8	HUMAN	Alpha-1-acid glycoprotein 1
[6]		P02763	91	1195.99	4	-4.5	SVQEIQATFFYFTPNKTEDTI	Incorrect Mono 1Da@Neutral loss;HexNAc5Hex5FucNeuAc+Cation:K@15	glycopepnew_HCDEThcDiTCIDpeptide_EThcDpd2	64.05	1	18821	22.9	1.4e-05	2	23511.8	HUMAN	Alpha-1-acid glycoprotein 1
[6]		P02763	91	1118.97	4	-0.91	SVQEIQATFFYFTPNKTEDTI	Incorrect Mono 1Da@Neutral loss=13;HexNAc5Hex4NeuAc+Cation:K@15=13	glycopepnew_HCDEThcDiTCIDpeptide_EThcDpd2	46.017	1	13035	20.2	2.8e-06	2	23511.8	HUMAN	Alpha-1-acid glycoprotein 1
[6]		P02763	91	1210.25	4	-3.4	SVQEIQATFFYFTPNKTEDTI	Incorrect Mono 1Da@Neutral loss=6;HexNAc6Hex5NeuAc+Cation:K@15=6	glycopepnew_HCDEThcDiTCIDpeptide_EThcDpd2	45.65	2	12903	28.9	4.8e-09	2	23511.8	HUMAN	Alpha-1-acid glycoprotein 1
[6]		P02763	91	1130.52	4	0.29	SVQEIQATFFYFTPNKTEDTIFLR	Incorrect Mono 1Da@Neutral loss;HexNAc4Hex5@15	glycopepnew_HCDEThcDiTCIDpeptide_EThcDpd2	53.867	1	15576	21.3	8.4e-08	2	23511.8	HUMAN	Alpha-1-acid glycoprotein 1
[7]		P02790	44	1103.94	4	0.87	SWPAVGNCSSALR	Incorrect Mono 1Da@Neutral loss;HexNAc5Hex6FucNeuAc3@7	glycopepnew_HCDEThcDiTCIDpeptide_EThcDpd2	43.667	2	12243	11.6	8.3e-05	1	51676.8	HUMAN	Hemopexin
[7]		P02790	44	1076.91	4	-0.13	SWPAVGNCSSALR	Incorrect Mono 1Da@Neutral loss;HexNAc5Hex6NeuAc3+Cation:K@7	glycopepnew_HCDEThcDiTCIDpeptide_EThcDpd2	43.433	1	12174	34.7	1.2e-10	1	51676.8	HUMAN	Hemopexin
[1]		P01009	159	1311.78	5	2.4	THDEILEGLNFNLTEIPEAQIHEGFQELLR	Incorrect Mono 1Da@Neutral loss;HexNAc6Hex5FucNeuAc3@12	glycopepnew_HCDEThcDiTCIDpeptide_EThcDpd2	68.967	2	20387	35.2	2.1e-11	1	46736.9	HUMAN	Alpha-1-antitrypsin
[1]		P01009	159	1099.63	6	-7.8	THDEILEGLNFNLTEIPEAQIHEGFQELLR	Incorrect Mono 1Da@Neutral loss;HexNAc6Hex5FucNeuAc3+Cation:K@12	glycopepnew_HCDEThcDiTCIDpeptide_EThcDpd2	63.533	1	18666	32	8.4e-12	1	46736.9	HUMAN	Alpha-1-antitrypsin
[1]		P01009	159	1366.59	5	5.9	THDEILEGLNFNLTEIPEAQIHEGFQELLR	Incorrect Mono 1Da@Neutral loss;HexNAc7Hex7FucNeuAc2+Cation:K@12	glycopepnew_HCDEThcDiTCIDpeptide_EThcDpd2	57.3	1	16672	30.4	2.2e-10	1	46736.9	HUMAN	Alpha-1-antitrypsin
[11]		P01011	24	1269.52	4	1.4	TLNQSSDELQLSMGNAMFVK	Incorrect Mono 1Da@Neutral loss;HexNAc5Hex6NeuAc3@3	glycopepnew_HCDEThcDiTCIDpeptide_EThcDpd2	57.767	1	16815	35.4	7.4e-12	1	47651.3	HUMAN	Alpha-1-antichymotrypsin
[11]		P01011	24	1269.52	4	3.3	TLNQSSDELQLSMGNAMFVK	Incorrect Mono 1Da@Neutral loss;HexNAc5Hex6NeuAc3@3||HexNAc6Hex9Fuc+Cation:K@3	glycopepnew_HCDEThcDiTCIDpeptide_EThcDpd2	59.717	2	17434	30.3	7.3e-12	1	47651.3	HUMAN	Alpha-1-antichymotrypsin
[11]		P01011	24	1114.95	4	-0.033	TLNQSSDELQLSMGNAMFVK	Incorrect Mono 1Da@Neutral loss=136;HexNAc4Hex5NeuAc2+Cation:K@3=105	glycopepnew_HCDEThcDiTCIDpeptide_EThcDpd2	50.033	1	14327	59.7	1.1e-21	1	47651.3	HUMAN	Alpha-1-antichymotrypsin
[11]		P01011	24	1206.48	4	-7.3	TLNQSSDELQLSMGNAMFVK	Incorrect Mono 1Da@Neutral loss=33;HexNAc5Hex6Fuc2NeuAc+Cation:K@3=33	glycopepnew_HCDEThcDiTCIDpeptide_EThcDpd2	48.7	1	13898	19.4	3.7e-07	1	47651.3	HUMAN	Alpha-1-antichymotrypsin
[11]		P01011	24	1105.47	4	6.1	TLNQSSDELQLSMGNAMFVK	Incorrect Mono 1Da@Neutral loss=46;HexNAc4Hex5NeuAc2@3=46	glycopepnew_HCDEThcDiTCIDpeptide_EThcDpd2	50.9	1	14608	40	2.3e-09	1	47651.3	HUMAN	Alpha-1-antichymotrypsin
[11]		P01011	24	1206.23	4	-0.71	TLNQSSDELQLSMGNAMFVK	Incorrect Mono 1Da@Neutral loss=60;HexNAc5Hex6NeuAc2+Cation:K@3=60	glycopepnew_HCDEThcDiTCIDpeptide_EThcDpd2	49.417	1	14136	22.8	2.1e-09	1	47651.3	HUMAN	Alpha-1-antichymotrypsin
[33]		P05543	4	1082.96	4	2	TLYETEVFSTDFSNISAAK	Incorrect Mono 1Da@Neutral loss=57;HexNAc4Hex5NeuAc2@14=57	glycopepnew_HCDEThcDiTCIDpeptide_EThcDpd2	49.383	1	14126	49.8	4e-15	1	46324.9	HUMAN	Thyroxine-binding globulin
[21]		P43652	10	1168.26	5	-1.6	TTCCTLSEEFACVDNLADLVFGELCGVNENR	Incorrect Mono 1Da@Neutral loss=25;HexNAc4Hex5NeuAc2+Cation:K@30=25	glycopepnew_HCDEThcDiTCIDpeptide_EThcDpd2	75.85	1	22610	26.6	9.5e-12	1	69069.8	HUMAN	Afamin
[8]		P01024	32	1104.18	3	0.16	TVLTPATNHMGNVTFTIPANR	Incorrect Mono 1Da@Neutral loss;HexNAc2Hex4@12=10	glycopepnew_HCDEThcDiTCIDpeptide_EThcDpd2	31.317	1	8060	34.7	2.8e-11	1	187150	HUMAN	Complement C3
[8]		P01024	32	909.412	4	-3.1	TVLTPATNHMGNVTFTIPANR	Incorrect Mono 1Da@Neutral loss;HexNAc2Hex5Fuc&Oxidation@(12&10)||HexNAc2Hex6@12	glycopepnew_HCDEThcDiTCIDpeptide_EThcDpd2	32.883	1	8576	22.4	3.9e-07	1	187150	HUMAN	Complement C3
[8]		P01024	32	918.899	4	-5.9	TVLTPATNHMGNVTFTIPANR	Incorrect Mono 1Da@Neutral loss;HexNAc2Hex5Fuc+Cation:K&Oxidation@(12&10)||HexNAc2Hex6+Cation:K@12	glycopepnew_HCDEThcDiTCIDpeptide_EThcDpd2	32.35	1	8391	47.4	5.3e-16	1	187150	HUMAN	Complement C3
[8]		P01024	32	1217.55	3	-0.89	TVLTPATNHMGNVTFTIPANR	Incorrect Mono 1Da@Neutral loss;Oxidation@10;HexNAc2Hex6@12	glycopepnew_HCDEThcDiTCIDpeptide_EThcDpd2	27.817	1	6921	36.7	1.4e-16	1	187150	HUMAN	Complement C3
[8]		P01024	32	923.666	4	-5.4	TVLTPATNHMGNVTFTIPANR	Incorrect Mono 1Da@Neutral loss;Oxidation@10;HexNAc3Hex5@12	glycopepnew_HCDEThcDiTCIDpeptide_EThcDpd2	23.75	1	5587	37.5	3.6e-07	1	187150	HUMAN	Complement C3
[8]		P01024	32	964.181	4	-2.6	TVLTPATNHMGNVTFTIPANR	Incorrect Mono 1Da@Neutral loss;Oxidation@10;HexNAc3Hex6@12	glycopepnew_HCDEThcDiTCIDpeptide_EThcDpd2	23.683	2	5564	19.5	1.5e-05	1	187150	HUMAN	Complement C3
[8]		P01024	32	1047.22	4	3.1	TVLTPATNHMGNVTFTIPANR	Incorrect Mono 1Da@Neutral loss=70;Oxidation@10=70;HexNAc4Hex5NeuAc@12=70	glycopepnew_HCDEThcDiTCIDpeptide_EThcDpd2	25.35	1	6111	45.6	1e-13	1	187150	HUMAN	Complement C3
[11]		P01011	24	1091.25	4	-0.5	TVVELKYTGNASALFILPDQDK	Incorrect Mono 1Da@Neutral loss;HexNAc5Hex3FucNeuAc@10	glycopepnew_HCDEThcDiTCIDpeptide_EThcDpd2	47.683	2	13575	20.1	2.3e-05	1	47651.3	HUMAN	Alpha-1-antichymotrypsin
[19]		P02765	10	1168.71	4	-0.95	VCQDCPLLAPLNDTR	Incorrect Mono 1Da@Neutral loss;HexNAc5Hex6NeuAc3+Cation:K@12	glycopepnew_HCDEThcDiTCIDpeptide_EThcDpd2	53.633	1	15503	24.4	1.9e-08	1	39325	HUMAN	Alpha-2-HS-glycoprotein
[2-1]	33	P01877	119	1376.01	5	-6.7	VFPLSLDSTPQDGNVVVACLVQGFFPQEPLSVTWSESGQNVTAR	Incorrect Mono 1Da@Neutral loss;HexNAc4Hex5Fuc3+Cation:K@40	glycopepnew_HCDEThcDiTCIDpeptide_EThcDpd2	68.817	1	20333	27.4	1.1e-09	1	36591.7	HUMAN	Immunoglobulin heavy constant alpha 2
[2-1]	33	P01877	119	1350.62	5	0.82	VFPLSLDSTPQDGNVVVACLVQGFFPQEPLSVTWSESGQNVTAR	Incorrect Mono 1Da@Neutral loss;HexNAc5Hex4Fuc2&Oxidation@(40&34)||HexNAc5Hex5Fuc@40	glycopepnew_HCDEThcDiTCIDpeptide_EThcDpd2	61.283	2	17950	26.8	3.4e-09	1	36591.7	HUMAN	Immunoglobulin heavy constant alpha 2
[2-1]	33	P01877	119	1019.46	7	-0.61	VFPLSLDSTPQDGNVVVACLVQGFFPQEPLSVTWSESGQNVTAR	Incorrect Mono 1Da@Neutral loss;HexNAc6Hex6Fuc&Oxidation@(40&34)||HexNAc6Hex7@40	glycopepnew_HCDEThcDiTCIDpeptide_EThcDpd2	73.65	1	21903	18.6	5.8e-06	1	36591.7	HUMAN	Immunoglobulin heavy constant alpha 2
[2-1]	33	P01877	119	1380.81	5	-7.6	VFPLSLDSTPQDGNVVVACLVQGFFPQEPLSVTWSESGQNVTARN	Incorrect Mono 1Da@Neutral loss;Oxidation@34;HexNAc5Hex4NeuAc+Cation:K@40	glycopepnew_HCDEThcDiTCIDpeptide_EThcDpd2	68.733	1	20309	24.7	9.5e-07	1	36591.7	HUMAN	Immunoglobulin heavy constant alpha 2
[26]		P05155	7	1140.03	4	-0.032	VGQLQLSHNLSLVILVPQNLK	Incorrect Mono 1Da@Neutral loss=9;HexNAc4Hex5NeuAc2+Cation:K@9=9	glycopepnew_HCDEThcDiTCIDpeptide_EThcDpd2	50.05	1	14331	13.6	5.6e-05	1	55154.7	HUMAN	Plasma protease C1 inhibitor
[26]		P05155	7	1251.02	4	-1.7	VLSNNSDANLELINTWVAK	Incorrect Mono 1Da@Neutral loss;HexNAc5Hex6NeuAc3+Cation:K@4	glycopepnew_HCDEThcDiTCIDpeptide_EThcDpd2	60.367	2	17656	28.1	1.5e-09	1	55154.7	HUMAN	Plasma protease C1 inhibitor
[3]		P00738	120	1217.54	4	3.5	VSHHNLTTGATLINEQWLLTTAK	Incorrect Mono 1Da@Neutral loss;HexNAc5Hex6Fuc2+Cation:K@5=50	glycopepnew_HCDEThcDiTCIDpeptide_EThcDpd2	35.817	2	9563	28	5.7e-09	1	45205.7	HUMAN	Haptoglobin
[4]		P01023	96	911.396	5	3.8	VSNQTLSLFFTVLQDVPVR	Incorrect Mono 1Da@Neutral loss;HexNAc2Hex12+Cation:K@3||HexNAc4Hex5FucNeuAc2+Cation:K@3	glycopepnew_HCDEThcDiTCIDpeptide_EThcDpd2	67.383	2	19889	12	6.1e-06	1	163292	HUMAN	Alpha-2-macroglobulin
[4]		P01023	96	1102.48	4	-5.6	VSNQTLSLFFTVLQDVPVR	Incorrect Mono 1Da@Neutral loss;HexNAc4Hex5NeuAc2+Cation:K@3	glycopepnew_HCDEThcDiTCIDpeptide_EThcDpd2	67.433	1	19899	64.2	3.5e-21	1	163292	HUMAN	Alpha-2-macroglobulin
[4]		P01023	96	1257.05	4	1.1	VSNQTLSLFFTVLQDVPVR	Incorrect Mono 1Da@Neutral loss;HexNAc5Hex6NeuAc3@3||HexNAc6Hex9Fuc+Cation:K@3	glycopepnew_HCDEThcDiTCIDpeptide_EThcDpd2	78.35	2	23402	40.9	1.2e-12	1	163292	HUMAN	Alpha-2-macroglobulin
[4]		P01023	96	1266.54	4	1	VSNQTLSLFFTVLQDVPVR	Incorrect Mono 1Da@Neutral loss;HexNAc5Hex6NeuAc3+Cation:K@3	glycopepnew_HCDEThcDiTCIDpeptide_EThcDpd2	77.433	1	23110	36.4	6.6e-15	1	163292	HUMAN	Alpha-2-macroglobulin
[4]		P01023	96	1230.28	4	-2.2	VSNQTLSLFFTVLQDVPVR	Incorrect Mono 1Da@Neutral loss=11;HexNAc5Hex6FucNeuAc2+Cation:K@3=11	glycopepnew_HCDEThcDiTCIDpeptide_EThcDpd2	66.633	2	19653	16.9	6.7e-06	1	163292	HUMAN	Alpha-2-macroglobulin
[4]		P01023	96	1139	4	-0.66	VSNQTLSLFFTVLQDVPVR	Incorrect Mono 1Da@Neutral loss=16;HexNAc2Hex12+Cation:K@3||HexNAc4Hex5FucNeuAc2+Cation:K@3	glycopepnew_HCDEThcDiTCIDpeptide_EThcDpd2	68.9	1	20364	16	4.3e-06	1	163292	HUMAN	Alpha-2-macroglobulin
[4]		P01023	96	1092.99	4	0.12	VSNQTLSLFFTVLQDVPVR	Incorrect Mono 1Da@Neutral loss=28;HexNAc4Hex5NeuAc2@3=28	glycopepnew_HCDEThcDiTCIDpeptide_EThcDpd2	69.05	2	20414	27.1	2.2e-08	1	163292	HUMAN	Alpha-2-macroglobulin
[33]		P05543	4	1135.46	4	3	VTACHSSQPNATLYK	Incorrect Mono 1Da@Neutral loss;HexNAc5Hex6NeuAc3@10	glycopepnew_HCDEThcDiTCIDpeptide_EThcDpd2	24.05	1	5689	13.9	3.8e-05	1	46324.9	HUMAN	Thyroxine-binding globulin
[12]		P08185	24	1380.59	4	-3.8	VTISGVYDLGDVLEEMGIADLFTNQANFSR	Incorrect Mono 1Da@Neutral loss=9;HexNAc4Hex5Fuc2NeuAc+Cation:K@27=9	glycopepnew_HCDEThcDiTCIDpeptide_EThcDpd2	79.533	1	23768	17.4	1e-05	1	45141.3	HUMAN	Corticosteroid-binding globulin
[3]		P00738	120	692.115	5	-1.7	VVLHPNYSQVDIGLIK	Incorrect Mono 1Da@Neutral loss;HexNAc4Hex5+Cation:K@6	glycopepnew_HCDEThcDiTCIDpeptide_EThcDpd2	31.267	1	8045	54.6	4.6e-14	1	45205.7	HUMAN	Haptoglobin
[3]		P00738	120	1092.48	4	-5.7	VVLHPNYSQVDIGLIK	Incorrect Mono 1Da@Neutral loss;HexNAc5Hex6Fuc2NeuAc@6	glycopepnew_HCDEThcDiTCIDpeptide_EThcDpd2	40	1	10981	23	3.2e-07	1	45205.7	HUMAN	Haptoglobin
[3]		P00738	120	1201.52	4	-0.44	VVLHPNYSQVDIGLIK	Incorrect Mono 1Da@Neutral loss;HexNAc5Hex6FucNeuAc3@6	glycopepnew_HCDEThcDiTCIDpeptide_EThcDpd2	45.067	1	12714	45.1	8.2e-11	1	45205.7	HUMAN	Haptoglobin
[3]		P00738	120	1165.01	4	1.9	VVLHPNYSQVDIGLIK	Incorrect Mono 1Da@Neutral loss;HexNAc5Hex6NeuAc3@6	glycopepnew_HCDEThcDiTCIDpeptide_EThcDpd2	45.783	1	12948	28.7	2.4e-08	1	45205.7	HUMAN	Haptoglobin
[3]		P00738	120	1256.29	4	2.2	VVLHPNYSQVDIGLIK	Incorrect Mono 1Da@Neutral loss;HexNAc6Hex7NeuAc3@6	glycopepnew_HCDEThcDiTCIDpeptide_EThcDpd2	44.083	2	12388	27.4	2.5e-05	1	45205.7	HUMAN	Haptoglobin
[3]		P00738	120	1092.23	4	-1.2	VVLHPNYSQVDIGLIK	Incorrect Mono 1Da@Neutral loss=37;HexNAc5Hex6NeuAc2@6=37	glycopepnew_HCDEThcDiTCIDpeptide_EThcDpd2	39.767	1	10907	38.4	1.7e-09	1	45205.7	HUMAN	Haptoglobin
[3]		P00738	120	1010.44	4	-2.9	VVLHPNYSQVDIGLIK	Incorrect Mono 1Da@Neutral loss=55;HexNAc4Hex5NeuAc2+Cation:K@6=55	glycopepnew_HCDEThcDiTCIDpeptide_EThcDpd2	40.117	1	11025	36.5	1.9e-11	1	45205.7	HUMAN	Haptoglobin
[3]		P00738	120	1000.95	4	1.8	VVLHPNYSQVDIGLIK	Incorrect Mono 1Da@Neutral loss=61;HexNAc4Hex5NeuAc2@6=61	glycopepnew_HCDEThcDiTCIDpeptide_EThcDpd2	40.933	2	11302	42.7	1.7e-09	1	45205.7	HUMAN	Haptoglobin
[3]		P00738	120	928.179	4	1.2	VVLHPNYSQVDIGLIK	Incorrect Mono 1Da@Neutral loss=65;HexNAc4Hex5NeuAc@6=65	glycopepnew_HCDEThcDiTCIDpeptide_EThcDpd2	35.417	1	9424	44	1.1e-08	1	45205.7	HUMAN	Haptoglobin
[3]		P00738	120	1024.96	4	4.8	VVLHPNYSQVDIGLIK	Incorrect Mono 1Da@Neutral loss=68;HexNAc5Hex5FucNeuAc+Cation:K@6=68	glycopepnew_HCDEThcDiTCIDpeptide_EThcDpd2	34.8	2	9219	60.3	1.6e-11	1	45205.7	HUMAN	Haptoglobin
[14]		P01019	14	1113.5	4	-1.6	VYIHPFHLVIHNESTCEQLAK	Incorrect Mono 1Da@Neutral loss;HexNAc4Hex5Fuc2@12	glycopepnew_HCDEThcDiTCIDpeptide_EThcDpd2	26.933	1	6625	16.2	9.1e-05	1	53154.7	HUMAN	Angiotensinogen
[14]		P01019	14	1186.02	4	2.9	VYIHPFHLVIHNESTCEQLAK	Incorrect Mono 1Da@Neutral loss=25;HexNAc4Hex5NeuAc2@12=25	glycopepnew_HCDEThcDiTCIDpeptide_EThcDpd2	29.95	1	7592	12.9	5.5e-06	1	53154.7	HUMAN	Angiotensinogen
[9]		P00450	29	1093.99	4	-1.6	WNYAPSGIDIFTKENLTAPGSDSAVFFEQGTTR	Incorrect Mono 1Da@Neutral loss;HexNAc2HexFuc+Cation:K@15	glycopepnew_HCDEThcDiTCIDpeptide_EThcDpd2	45.633	1	12895	13.7	5.9e-05	1	122206	HUMAN	Ceruloplasmin
[3]		P00738	120	1272.82	4	-1.6	WQAKMVSHHNLTTGATLINEQWLLTTAK	Incorrect Mono 1Da@Neutral loss;HexNAc3Hex5FucNeuAc+Cation:K@10	glycopepnew_HCDEThcDiTCIDpeptide_EThcDpd2	34.833	1	9232	44.8	1.5e-15	1	45205.7	HUMAN	Haptoglobin
[21]		P43652	10	1094.18	4	4.2	YAEDKFNETT	Incorrect Mono 1Da@Neutral loss;HexNAc7Hex8FucNeuAc@7	glycopepnew_HCDEThcDiTCIDpeptide_EThcDpd2	23.883	2	5636	13.6	4.7e-07	1	69069.8	HUMAN	Afamin
[1]		P01009	159	1328.55	3	4.5	YLGNATAIFFLPDEGK	Incorrect Mono 1Da@Neutral loss;HexNAc4Hex4FucNeuAc2+Cation:K@4	glycopepnew_HCDEThcDiTCIDpeptide_EThcDpd2	56.417	1	16393	23.7	1.2e-09	1	46736.9	HUMAN	Alpha-1-antitrypsin
[1]		P01009	159	1000.91	4	-5.8	YLGNATAIFFLPDEGK	Incorrect Mono 1Da@Neutral loss;HexNAc4Hex5Fuc2NeuAc+Cation:K@4	glycopepnew_HCDEThcDiTCIDpeptide_EThcDpd2	60.217	1	17601	25.4	1.5e-09	1	46736.9	HUMAN	Alpha-1-antitrypsin
[1]		P01009	159	1102.49	3	0.98	YLGNATAIFFLPDEGK	Incorrect Mono 1Da@Neutral loss=21;HexNAc3Hex4NeuAc@4=21	glycopepnew_HCDEThcDiTCIDpeptide_EThcDpd2	55.283	1	16036	34.9	4.1e-12	1	46736.9	HUMAN	Alpha-1-antitrypsin
[1]		P01009	159	1000.66	4	-2.9	YLGNATAIFFLPDEGK	Incorrect Mono 1Da@Neutral loss=41;HexNAc4Hex5NeuAc2+Cation:K@4=41	glycopepnew_HCDEThcDiTCIDpeptide_EThcDpd2	54.6	2	15816	23.2	3.7e-11	1	46736.9	HUMAN	Alpha-1-antitrypsin
[1]		P01009	159	927.89	4	2	YLGNATAIFFLPDEGK	Incorrect Mono 1Da@Neutral loss=99;HexNAc4Hex5NeuAc+Cation:K@4=99	glycopepnew_HCDEThcDiTCIDpeptide_EThcDpd2	55.5	1	16099	65.5	5.4e-21	1	46736.9	HUMAN	Alpha-1-antitrypsin
[18]		P00734	12	984.218	5	4.2	YPHKPEINSTTHPGADLQENFCR	Incorrect Mono 1Da@Neutral loss=22;HexNAc4Hex5NeuAc2@8=22	glycopepnew_HCDEThcDiTCIDpeptide_EThcDpd2	21.95	2	4984	12.8	4.8e-05	1	70037.5	HUMAN	Prothrombin
[18]		P00734	12	1013.43	5	0.24	YPHKPEINSTTHPGADLQENFCR	Incorrect Mono 1Da@Neutral loss=58;HexNAc4Hex5FucNeuAc2@8=58	glycopepnew_HCDEThcDiTCIDpeptide_EThcDpd2	24.967	1	5992	32.2	1.6e-10	1	70037.5	HUMAN	Prothrombin
[18]		P00734	12	925.995	5	-0.0017	YPHKPEINSTTHPGADLQENFCR	Incorrect Mono 1Da@Neutral loss=62;HexNAc4Hex5NeuAc@8=62	glycopepnew_HCDEThcDiTCIDpeptide_EThcDpd2	22.95	2	5322	23.4	9.5e-09	1	70037.5	HUMAN	Prothrombin
[18]		P00734	12	955.209	5	2.9	YPHKPEINSTTHPGADLQENFCR	Incorrect Mono 1Da@Neutral loss=89;HexNAc4Hex5FucNeuAc@8=89	glycopepnew_HCDEThcDiTCIDpeptide_EThcDpd2	22.433	1	5147	57.6	3.5e-19	1	70037.5	HUMAN	Prothrombin
[18]		P00734	12	1233.77	4	4.5	YPHKPEINSTTHPGADLQENFCRNPDS	Incorrect Mono 1Da@Neutral loss;HexNAc4Hex5Fuc+Cation:K@8	glycopepnew_HCDEThcDiTCIDpeptide_EThcDpd2	24.1	1	5702	17.8	9.6e-06	1	70037.5	HUMAN	Prothrombin
[11]		P01011	24	1355.05	4	0.7	YTGNASALFILPDQDK	Incorrect Mono 1Da@Neutral loss;HexNAc6Hex7FucNeuAc4@4	glycopepnew_HCDEThcDiTCIDpeptide_EThcDpd2	78.167	1	23341	18.1	2.2e-06	1	47651.3	HUMAN	Alpha-1-antichymotrypsin
[11]		P01011	24	1364.53	4	-2	YTGNASALFILPDQDK	Incorrect Mono 1Da@Neutral loss;HexNAc6Hex7FucNeuAc4+Cation:K@4	glycopepnew_HCDEThcDiTCIDpeptide_EThcDpd2	74.65	1	22221	21.1	8.8e-09	1	47651.3	HUMAN	Alpha-1-antichymotrypsin
[11]		P01011	24	1318.53	4	-0.99	YTGNASALFILPDQDK	Incorrect Mono 1Da@Neutral loss;HexNAc6Hex7NeuAc4@4	glycopepnew_HCDEThcDiTCIDpeptide_EThcDpd2	73.667	2	21912	23.4	8.8e-09	1	47651.3	HUMAN	Alpha-1-antichymotrypsin
[18]		P00734	12	1143.23	4	-0.049	PWDKNFTENDLLVR	HexNAc6Hex8NeuAc&Incorrect Mono 1Da&Oxidation@(5&Neutral loss&2)||HexNAc6Hex9Fuc@5	glycopepnew_HCDEThcDiTCIDpeptide_EThcDpd2	40.183	2	11047	12.6	9.3e-05	1	70037.5	HUMAN	Prothrombin
[5]		P02787	86	1217.75	4	0.6	QQQHLFGSNVTDCSGNFCLFR	HexNAc4Hex5Fuc3NeuAc&Incorrect Mono 1Da@(9&Neutral loss)||HexNAc6Hex7@9||HexNAc9Hex3+Cation:K&Incorrect Mono 1Da@(9&Neutral loss)	glycopepnew_HCDEThcDiTCIDpeptide_EThcDpd2	42.967	1	12005	14.4	6.5e-05	1	77064.7	HUMAN	Serotransferrin
[6]		P02763	91	1225.73	5	-4.5	SVQEIQATFFYFTPNKTEDTIFLR	HexNAc6Hex7Fuc4NeuAc&Incorrect Mono 1Da@(15&Neutral loss)||HexNAc8Hex9Fuc@15	glycopepnew_HCDEThcDiTCIDpeptide_EThcDpd2	59.017	1	17224	19.6	4.2e-05	2	23511.8	HUMAN	Alpha-1-acid glycoprotein 1
[12]		P08185	24	1371.1	4	0.31	VTISGVYDLGDVLEEMGIADLFTNQANFSR	HexNAc4Hex5Fuc2NeuAc&Incorrect Mono 1Da@(27&Neutral loss)||HexNAc4Hex5Fuc4@27||HexNAc6Hex6&Oxidation@(27&16)	glycopepnew_HCDEThcDiTCIDpeptide_EThcDpd2	80.167	2	23968	19.9	1.8e-05	1	45141.3	HUMAN	Corticosteroid-binding globulin
[1]		P01009	159	1363.84	4	2.7	NSTNIFFSPVSIATAFAMLSLGTK	HexNAc5Hex8Fuc4+Cation:K&Incorrect Mono 1Da@(1&Neutral loss)||HexNAc6Hex7NeuAc2@1	glycopepnew_HCDEThcDiTCIDpeptide_EThcDpd2	68.233	2	20147	30.5	2.8e-07	1	46736.9	HUMAN	Alpha-1-antitrypsin
[32]		P19827	4	1035.64	5	-4.7	ICDLLVANNHFAHFFAPQNLTNMNK	HexNAc4Hex5Fuc2NeuAc+Cation:K&Incorrect Mono 1Da@(19&Neutral loss)||HexNAc4Hex5Fuc4+Cation:K@19	glycopepnew_HCDEThcDiTCIDpeptide_EThcDpd2	44.067	1	12378	41.8	3.4e-14	1	101390	HUMAN	Inter-alpha-trypsin inhibitor heavy chain H1
[22]		O75882	8	1297.02	4	-4.3	MPSQAPTGNFYPQPLLNSSMCLEDSR	HexNAc4Hex5Fuc2NeuAc+Cation:K&Incorrect Mono 1Da@(17&Neutral loss)||HexNAc4Hex5Fuc4+Cation:K@17	glycopepnew_HCDEThcDiTCIDpeptide_EThcDpd2	49.183	1	14054	25.1	2.2e-09	1	158538	HUMAN	Attractin
[1]		P01009	159	1086.08	5	-6.5	QLAHQSNSTNIFFSPVSIATAFAMLSLGTK	HexNAc4Hex5Fuc2NeuAc+Cation:K&Incorrect Mono 1Da@(7&Neutral loss)||HexNAc4Hex5Fuc4+Cation:K@7	glycopepnew_HCDEThcDiTCIDpeptide_EThcDpd2	69.15	1	20443	39	3.7e-14	1	46736.9	HUMAN	Alpha-1-antitrypsin
[6-1]	30	P19652	74	1297.75	4	-6	QNQCFYNSSYLNVQR	HexNAc6Hex7Fuc4NeuAc+Cation:K&Incorrect Mono 1Da@(7&Neutral loss)||HexNAc8Hex9Fuc+Cation:K@7	glycopepnew_HCDEThcDiTCIDpeptide_EThcDpd2	43.7	1	12252	23.4	8.7e-08	1	23602.8	HUMAN	Alpha-1-acid glycoprotein 2
[1]		P01009	159	1395.6	4	0.074	SNSTNIFFSPVSIATAFAMLSLGTK	HexNAc6Hex7Fuc2NeuAc+Cation:K&Incorrect Mono 1Da@(2&Neutral loss)||HexNAc6Hex7Fuc4+Cation:K@2	glycopepnew_HCDEThcDiTCIDpeptide_EThcDpd2	80.283	1	23998	13.2	5.2e-05	1	46736.9	HUMAN	Alpha-1-antitrypsin
[35]		P02749	3	1055.94	6	5.1	VFECLPQHAMFGNDTITCTTHGNWTKLPECR	HexNAc5Hex6Fuc2NeuAc+Cation:K&Incorrect Mono 1Da@(13&Neutral loss)||HexNAc7Hex7+Cation:K&Oxidation@(13&10)	glycopepnew_HCDEThcDiTCIDpeptide_EThcDpd2	30.5	1	7765	13.6	0.00016	1	38298.6	HUMAN	Beta-2-glycoprotein 1
[2-1]	33	P01877	119	1388.8	5	-4.9	VFPLSLDSTPQDGNVVVACLVQGFFPQEPLSVTWSESGQNVT	HexNAc4Hex5Fuc3NeuAc+Cation:K&Incorrect Mono 1Da@(40&Neutral loss)||HexNAc6Hex6Fuc+Cation:K&Oxidation@(40&34)||HexNAc6Hex7+Cation:K@40	glycopepnew_HCDEThcDiTCIDpeptide_EThcDpd2	66.9	2	19733	13	1.4e-05	1	36591.7	HUMAN	Immunoglobulin heavy constant alpha 2
[3]		P00738	120	1226.3	4	-1.7	MVSHHNLTTGATLINEQWLLTTAK	Oxidation@1=38;HexNAc4Hex5Fuc2NeuAc&Incorrect Mono 1Da@(6&Neutral loss)||HexNAc4Hex5Fuc4@6	glycopepnew_HCDEThcDiTCIDpeptide_EThcDpd2	40.217	2	11060	38.1	7.3e-12	1	45205.7	HUMAN	Haptoglobin
[4]		P01023	96	1292.32	4	0.51	SLGNVNFTVSAEALESQELCGTEVPSVPEHGR	HexNAc4Hex4Fuc2@6||HexNAc4Hex4NeuAc&Incorrect Mono 1Da@(6&Neutral loss)	glycopepnew_HCDEThcDiTCIDpeptide_EThcDpd2	48.617	1	13870	14.8	9.3e-05	1	163292	HUMAN	Alpha-2-macroglobulin
[2]		P01876	150	1271.1	4	-0.56	LSLHRPALEDLLLGSEANLTCTLTGLR	HexNAc5Hex5Fuc2@18||HexNAc5Hex5NeuAc&Incorrect Mono 1Da@(18&Neutral loss)	glycopepnew_HCDEThcDiTCIDpeptide_EThcDpd2	48.567	2	13858	16.6	4e-05	2	37655	HUMAN	Immunoglobulin heavy constant alpha 1
[1]		P01009	159	1380.12	4	-0.44	QLAHQSNSTNIFFSPVSIATAFAMLSLGTK	Gln->pyro-Glu@1;HexNAc4Hex5Fuc3NeuAc&Incorrect Mono 1Da@(7&Neutral loss)||HexNAc6Hex7@7||HexNAc9Hex3+Cation:K&Incorrect Mono 1Da@(7&Neutral loss)	glycopepnew_HCDEThcDiTCIDpeptide_EThcDpd2	81.167	1	24261	13.5	4e-06	1	46736.9	HUMAN	Alpha-1-antitrypsin
[5]		P02787	86	1176.98	4	-2.8	QQQHLFGSNVTDCSGNFCLFR	Gln->pyro-Glu@1;HexNAc4Hex5Fuc2NeuAc&Incorrect Mono 1Da@(9&Neutral loss)||HexNAc4Hex5Fuc4@9	glycopepnew_HCDEThcDiTCIDpeptide_EThcDpd2	52.717	2	15206	24.4	6.4e-07	1	77064.7	HUMAN	Serotransferrin
[21]		P43652	10	1377.82	4	0.14	TTCCTLSEEFACVDNLADLVFGELCGVNENR	HexNAc4Hex5Fuc2@30||HexNAc4Hex5NeuAc&Incorrect Mono 1Da@(30&Neutral loss)	glycopepnew_HCDEThcDiTCIDpeptide_EThcDpd2	68.067	2	20095	24.3	2.1e-07	1	69069.8	HUMAN	Afamin
[4]		P01023	96	1151.51	4	-3.4	GCVLLSYLNETVTVSASLESVR	HexNAc4Hex5Fuc2NeuAc@9||HexNAc4Hex5NeuAc2&Incorrect Mono 1Da@(9&Neutral loss)	glycopepnew_HCDEThcDiTCIDpeptide_EThcDpd2	76.417	1	22793	33.3	2.4e-09	1	163292	HUMAN	Alpha-2-macroglobulin
[12]		P08185	24	1329.62	4	-5.2	AVLQLNEEGVDTAGSTGVTLNLTSKPIILR	HexNAc4Hex5Fuc2NeuAc@21||HexNAc4Hex5NeuAc2&Incorrect Mono 1Da@(21&Neutral loss)	glycopepnew_HCDEThcDiTCIDpeptide_EThcDpd2	47.767	1	13601	31.2	3e-05	1	45141.3	HUMAN	Corticosteroid-binding globulin
[16]		P04217	15	1367.61	5	0.59	FQSPAGTEALFELHNISVADSANYSCVYVDLKPPFGGSAPSER	HexNAc4Hex5Fuc2NeuAc@23||HexNAc4Hex5NeuAc2&Incorrect Mono 1Da@(23&Neutral loss)	glycopepnew_HCDEThcDiTCIDpeptide_EThcDpd2	50.517	1	14486	54.4	2.5e-14	1	54254	HUMAN	Alpha-1B-glycoprotein
[2]		P01876	150	1141.51	4	-2.8	PALEDLLLGSEANLTCTLTGLR	HexNAc4Hex5Fuc2NeuAc@13||HexNAc4Hex5NeuAc2&Incorrect Mono 1Da@(13&Neutral loss)	glycopepnew_HCDEThcDiTCIDpeptide_EThcDpd2	69.367	1	20514	30.9	8.2e-10	2	37655	HUMAN	Immunoglobulin heavy constant alpha 1
[16]		P04217	15	1033.93	6	0.17	REGDHEFLEVPEAQEDVEATFPVHQPGNYSCSYR	HexNAc4Hex5Fuc2NeuAc@28||HexNAc4Hex5NeuAc2&Incorrect Mono 1Da@(28&Neutral loss)	glycopepnew_HCDEThcDiTCIDpeptide_EThcDpd2	38.367	1	10422	41.2	2.2e-14	1	54254	HUMAN	Alpha-1B-glycoprotein
[6]		P02763	91	1367.35	4	0.11	SVQEIQATFFYFTPNKTEDTIFLR	HexNAc5Hex6Fuc2NeuAc@15||HexNAc5Hex6NeuAc2&Incorrect Mono 1Da@(15&Neutral loss)	glycopepnew_HCDEThcDiTCIDpeptide_EThcDpd2	53.4	3	15437	35.5	5.3e-06	2	23511.8	HUMAN	Alpha-1-acid glycoprotein 1
[12]		P08185	24	1370.85	4	-2.7	VTISGVYDLGDVLEEMGIADLFTNQANFSR	HexNAc4Hex5Fuc2NeuAc@27||HexNAc4Hex5NeuAc2&Incorrect Mono 1Da@(27&Neutral loss)	glycopepnew_HCDEThcDiTCIDpeptide_EThcDpd2	79.55	2	23778	30.1	3e-09	1	45141.3	HUMAN	Corticosteroid-binding globulin
[2]		P01876	150	1030.26	5	1.1	LSLHRPALEDLLLGSEANLT	HexNAc6Hex10Fuc@18||HexNAc9Hex6Fuc+Cation:K&Incorrect Mono 1Da@(18&Neutral loss)	glycopepnew_HCDEThcDiTCIDpeptide_EThcDpd2	48.15	2	13719	28	7.4e-10	2	37655	HUMAN	Immunoglobulin heavy constant alpha 1
[4]		P01023	96	1188.02	4	0.4	GCVLLSYLNETVTVSASLESVR	HexNAc4Hex5Fuc3NeuAc@9||HexNAc4Hex5FucNeuAc2&Incorrect Mono 1Da@(9&Neutral loss)||HexNAc9Hex3+Cation:K@9	glycopepnew_HCDEThcDiTCIDpeptide_EThcDpd2	62.533	2	18360	31.2	5.7e-09	1	163292	HUMAN	Alpha-2-macroglobulin
[29]		Q14624	6	1338.19	5	2.9	HLQMDIHIFEPQGISFLETESTFMTNQLVDALTTWQN	HexNAc4Hex5Fuc3NeuAc@37||HexNAc4Hex5FucNeuAc2&Incorrect Mono 1Da@(37&Neutral loss)||HexNAc9Hex3+Cation:K@37	glycopepnew_HCDEThcDiTCIDpeptide_EThcDpd2	60.35	1	17647	20.2	2.9e-07	1	103358	HUMAN	Inter-alpha-trypsin inhibitor heavy chain H4
[1]		P01009	159	1338.18	5	-2.4	ADTHDEILEGLNFNLTEIPEAQIHEGFQELLRTLN	HexNAc6Hex6Fuc3+Cation:K@14||HexNAc6Hex6FucNeuAc+Cation:K&Incorrect Mono 1Da@(14&Neutral loss)	glycopepnew_HCDEThcDiTCIDpeptide_EThcDpd2	62.567	2	18370	22	1.3e-07	1	46736.9	HUMAN	Alpha-1-antitrypsin
[6]		P02763	91	1198.77	4	0.69	CANLVPVPITNATLDQITGK	HexNAc6Hex6Fuc3+Cation:K@11||HexNAc6Hex6FucNeuAc+Cation:K&Incorrect Mono 1Da@(11&Neutral loss)	glycopepnew_HCDEThcDiTCIDpeptide_EThcDpd2	48.783	3	13930	13.7	2.8e-05	1	23511.8	HUMAN	Alpha-1-acid glycoprotein 1
[2]		P01876	150	988.645	5	3	LSLHRPALEDLLLGSEANLTCTLT	HexNAc5Hex5Fuc3+Cation:K@18||HexNAc5Hex5FucNeuAc+Cation:K&Incorrect Mono 1Da@(18&Neutral loss)	glycopepnew_HCDEThcDiTCIDpeptide_EThcDpd2	47.967	2	13668	40.9	3.5e-13	2	37655	HUMAN	Immunoglobulin heavy constant alpha 1
[6]		P02763	91	1287.28	4	-2	SVQEIQATFFYFTPNKTEDTI	HexNAc6Hex6Fuc3+Cation:K@15||HexNAc6Hex6FucNeuAc+Cation:K&Incorrect Mono 1Da@(15&Neutral loss)	glycopepnew_HCDEThcDiTCIDpeptide_EThcDpd2	61.05	1	17866	25	2.5e-09	2	23511.8	HUMAN	Alpha-1-acid glycoprotein 1
[12]		P08185	24	1374.84	4	-1.3	VTISGVYDLGDVLEEMGIADLFTNQANFSR	HexNAc4Hex5Fuc2NeuAc&Oxidation@(27&16)||HexNAc4Hex5NeuAc2&Incorrect Mono 1Da&Oxidation@(27&Neutral loss&16)||HexNAc4Hex6FucNeuAc@27	glycopepnew_HCDEThcDiTCIDpeptide_EThcDpd2	69.467	2	20552	20.6	7.4e-07	1	45141.3	HUMAN	Corticosteroid-binding globulin
[12]		P08185	24	1385.1	4	-4.2	VTISGVYDLGDVLEEMGIADLFTNQANFSR	HexNAc5Hex4Fuc2NeuAc&Oxidation@(27&16)||HexNAc5Hex4NeuAc2&Incorrect Mono 1Da&Oxidation@(27&Neutral loss&16)||HexNAc5Hex5FucNeuAc@27	glycopepnew_HCDEThcDiTCIDpeptide_EThcDpd2	58.867	1	17167	24.1	2.2e-06	1	45141.3	HUMAN	Corticosteroid-binding globulin
[4]		P01023	96	1066.25	5	1.5	VNFTVSAEALESQELCGTEVPSVPEHGR	HexNAc5Hex4Fuc2NeuAc+Cation:K@2||HexNAc5Hex4NeuAc2+Cation:K&Incorrect Mono 1Da@(2&Neutral loss)	glycopepnew_HCDEThcDiTCIDpeptide_EThcDpd2	43.483	1	12187	21.4	8.6e-08	1	163292	HUMAN	Alpha-2-macroglobulin
[6]		P02763	91	1296	4	-2.9	QDQCIYNTTYLNVQR	HexNAc6Hex7Fuc2NeuAc2+Cation:K@7||HexNAc6Hex7NeuAc3+Cation:K&Incorrect Mono 1Da@(7&Neutral loss)	glycopepnew_HCDEThcDiTCIDpeptide_EThcDpd2	45.65	3	12905	28.3	2.1e-09	1	23511.8	HUMAN	Alpha-1-acid glycoprotein 1
[6]		P02763	91	1368.77	4	-1.2	QDQCIYNTTYLNVQR	HexNAc6Hex7Fuc2NeuAc3+Cation:K@7||HexNAc6Hex7NeuAc4+Cation:K&Incorrect Mono 1Da@(7&Neutral loss)	glycopepnew_HCDEThcDiTCIDpeptide_EThcDpd2	60.4	2	17665	30.2	8.2e-09	1	23511.8	HUMAN	Alpha-1-acid glycoprotein 1
[6-1]	30	P19652	74	1297.25	4	-1.2	QNQCFYNSSYLNVQR	HexNAc6Hex7Fuc2NeuAc2+Cation:K@7||HexNAc6Hex7NeuAc3+Cation:K&Incorrect Mono 1Da@(7&Neutral loss)	glycopepnew_HCDEThcDiTCIDpeptide_EThcDpd2	44.317	2	12466	29.8	9.7e-08	1	23602.8	HUMAN	Alpha-1-acid glycoprotein 2
[6]		P02763	91	1369.79	4	-0.96	SVQEIQATFFYFTPNK	HexNAc6Hex7Fuc2NeuAc3+Cation:K@15||HexNAc6Hex7NeuAc4+Cation:K&Incorrect Mono 1Da@(15&Neutral loss)	glycopepnew_HCDEThcDiTCIDpeptide_EThcDpd2	81.6	1	24386	18.4	8.4e-08	2	23511.8	HUMAN	Alpha-1-acid glycoprotein 1
[1]		P01009	159	914.571	6	-2.5	QLAHQSNSTNIFFSPVSIATAFAMLSLGTK	HexNAc5Hex4Fuc2NeuAc+Cation:K&Oxidation@(7&24)||HexNAc5Hex4NeuAc2+Cation:K&Incorrect Mono 1Da&Oxidation@(7&Neutral loss&24)||HexNAc5Hex5FucNeuAc+Cation:K@7	glycopepnew_HCDEThcDiTCIDpeptide_EThcDpd2	56.433	1	16399	17.6	7.4e-07	1	46736.9	HUMAN	Alpha-1-antitrypsin
[7]		P02790	44	1207.96	4	-2.9	CSDGWSFDATTLDDNGTMLFFK	HexNAc5Hex4Fuc2NeuAc+Cation:K&Oxidation@(15&18)||HexNAc5Hex4NeuAc2+Cation:K&Incorrect Mono 1Da&Oxidation@(15&Neutral loss&18)||HexNAc5Hex5FucNeuAc+Cation:K@15	glycopepnew_HCDEThcDiTCIDpeptide_EThcDpd2	49.717	2	14238	27.4	6e-09	1	51676.8	HUMAN	Hemopexin
[1]		P01009	159	1347.35	4	4.5	QLAHQSNSTNIFFSPVSIATAFAMLSLGTK	Oxidation@24=19;Gln->pyro-Glu&HexNAc4Hex5Fuc2NeuAc@(1&7)||HexNAc5Hex7+Cation:K&Incorrect Mono 1Da@(7&Neutral loss)	glycopepnew_HCDEThcDiTCIDpeptide_EThcDpd2	76.067	1	22677	28.1	1.6e-08	1	46736.9	HUMAN	Alpha-1-antitrypsin
[1]		P01009	159	1357.35	4	-3.1	QLAHQSNSTNIFFSPVSIATAFAMLSLGTK	Gln->pyro-Glu&HexNAc5Hex4NeuAc2&Oxidation@(1&7&24)||HexNAc4Hex5Fuc2NeuAc+Cation:K&Incorrect Mono 1Da@(7&Neutral loss)||HexNAc4Hex5Fuc4+Cation:K@7||HexNAc6Hex6+Cation:K&Oxidation@(7&24)	glycopepnew_HCDEThcDiTCIDpeptide_EThcDpd2	65.333	2	19235	13.6	9.5e-06	1	46736.9	HUMAN	Alpha-1-antitrypsin
[3]		P00738	120	1386.35	4	-6.5	QAKMVSHHNLTTGATLINEQWLLTTAK	Gln->pyro-Glu&HexNAc6Hex7Fuc+Cation:K&Oxidation@(1&9&4)||HexNAc4Hex5Fuc2NeuAc2+Cation:K&Incorrect Mono 1Da@(9&Neutral loss)	glycopepnew_HCDEThcDiTCIDpeptide_EThcDpd2	51.067	3	14673	22.4	1.6e-07	1	45205.7	HUMAN	Haptoglobin
[19]		P02765	10	1148.73	4	5.5	AALAAFNAQNNGSNFQLEEISR	HexNAc4Hex4FucNeuAc2+Cation:K@11	glycopepnew_HCDEThcDiTCIDpeptide_EThcDpd2	45.05	1	12707	44.7	4.5e-15	1	39325	HUMAN	Alpha-2-HS-glycoprotein
[19]		P02765	10	1143.24	4	1.9	AALAAFNAQNNGSNFQLEEISR	HexNAc4Hex5NeuAc2@11	glycopepnew_HCDEThcDiTCIDpeptide_EThcDpd2	44.95	2	12674	48.7	3.6e-13	1	39325	HUMAN	Alpha-2-HS-glycoprotein
[1]		P01009	159	1200.23	4	-1	ADTHDEILEGLNFNLTEI	HexNAc5Hex6FucNeuAc2+Cation:K@14	glycopepnew_HCDEThcDiTCIDpeptide_EThcDpd2	57.667	1	16779	25	1.8e-07	1	46736.9	HUMAN	Alpha-1-antitrypsin
[1]		P01009	159	1257.77	4	2.2	ADTHDEILEGLNFNLTEI	HexNAc9Hex6Fuc+Cation:K@14	glycopepnew_HCDEThcDiTCIDpeptide_EThcDpd2	68.933	1	20373	13	4e-06	1	46736.9	HUMAN	Alpha-1-antitrypsin
[1]		P01009	159	1134.48	4	-0.43	ADTHDEILEGLNFNLTEIP	HexNAc7Hex6@14	glycopepnew_HCDEThcDiTCIDpeptide_EThcDpd2	62.417	2	18319	28	3.9e-08	1	46736.9	HUMAN	Alpha-1-antitrypsin
[1]		P01009	159	1231.78	4	-1.8	ADTHDEILEGLNFNLTEIPEAQIH	HexNAc4Hex5NeuAc2@14	glycopepnew_HCDEThcDiTCIDpeptide_EThcDpd2	55.767	1	16177	21	5e-07	1	46736.9	HUMAN	Alpha-1-antitrypsin
[1]		P01009	159	974.483	4	1.6	ADTHDEILEGLNFNLTEIPEAQIHEGFQELLR	HexNAc@14	glycopepnew_HCDEThcDiTCIDpeptide_EThcDpd2	51.117	1	14688	72.4	4.2e-16	1	46736.9	HUMAN	Alpha-1-antitrypsin
[1]		P01009	159	1348.17	5	-1.6	ADTHDEILEGLNFNLTEIPEAQIHEGFQELLR	HexNAc5Hex6FucNeuAc3+Cation:K@14	glycopepnew_HCDEThcDiTCIDpeptide_EThcDpd2	62.917	1	18467	78.8	2.7e-30	1	46736.9	HUMAN	Alpha-1-antitrypsin
[1]		P01009	159	1311.37	5	-1.4	ADTHDEILEGLNFNLTEIPEAQIHEGFQELLR	HexNAc5Hex6NeuAc3@14||HexNAc6Hex9Fuc+Cation:K@14	glycopepnew_HCDEThcDiTCIDpeptide_EThcDpd2	71.333	1	21162	14.4	0.00011	1	46736.9	HUMAN	Alpha-1-antitrypsin
[1]		P01009	159	1208.84	6	-1.8	ADTHDEILEGLNFNLTEIPEAQIHEGFQELLR	HexNAc6Hex7Fuc2NeuAc3+Cation:K@14=54	glycopepnew_HCDEThcDiTCIDpeptide_EThcDpd2	69.683	1	20612	60.6	2.8e-18	1	46736.9	HUMAN	Alpha-1-antitrypsin
[1]		P01009	159	1384.8	5	-5.2	ADTHDEILEGLNFNLTEIPEAQIHEGFQELLR	HexNAc6Hex7Fuc4NeuAc@14	glycopepnew_HCDEThcDiTCIDpeptide_EThcDpd2	61.767	1	18106	31.8	4.6e-11	1	46736.9	HUMAN	Alpha-1-antitrypsin
[1]		P01009	159	1337.17	5	-0.51	ADTHDEILEGLNFNLTEIPEAQIHEGFQELLR	HexNAc6Hex8FucNeuAc+Cation:K@14	glycopepnew_HCDEThcDiTCIDpeptide_EThcDpd2	63.467	1	18639	18.4	5.5e-05	1	46736.9	HUMAN	Alpha-1-antitrypsin
[1]		P01009	159	1287.16	5	3.3	ADTHDEILEGLNFNLTEIPEAQIHEGFQELLR	HexNAc7Hex7Fuc+Cation:K@14	glycopepnew_HCDEThcDiTCIDpeptide_EThcDpd2	57.633	2	16775	31	1.1e-06	1	46736.9	HUMAN	Alpha-1-antitrypsin
[1]		P01009	159	1311.97	5	-2.2	ADTHDEILEGLNFNLTEIPEAQIHEGFQELLR	HexNAc7Hex8Fuc@14	glycopepnew_HCDEThcDiTCIDpeptide_EThcDpd2	69.683	2	20618	34.6	2.6e-14	1	46736.9	HUMAN	Alpha-1-antitrypsin
[1]		P01009	159	1377.79	5	-0.87	ADTHDEILEGLNFNLTEIPEAQIHEGFQELLR	HexNAc7Hex8FucNeuAc+Cation:K@14	glycopepnew_HCDEThcDiTCIDpeptide_EThcDpd2	62.75	1	18424	53.8	1.9e-18	1	46736.9	HUMAN	Alpha-1-antitrypsin
[1]		P01009	159	1340.98	5	-2.4	ADTHDEILEGLNFNLTEIPEAQIHEGFQELLR	HexNAc7Hex8NeuAc@14	glycopepnew_HCDEThcDiTCIDpeptide_EThcDpd2	64.7	1	19033	24.2	3.9e-08	1	46736.9	HUMAN	Alpha-1-antitrypsin
[1]		P01009	159	1123.98	6	-2.3	ADTHDEILEGLNFNLTEIPEAQIHEGFQELLR	HexNAc7Hex8NeuAc+Cation:K@14	glycopepnew_HCDEThcDiTCIDpeptide_EThcDpd2	62.117	1	18225	44.4	7e-16	1	46736.9	HUMAN	Alpha-1-antitrypsin
[29]		Q14624	6	1109.99	4	0.64	AFITNFSMIIDGMTYPGIIK	HexNAc4Hex5NeuAc2@5	glycopepnew_HCDEThcDiTCIDpeptide_EThcDpd2	66.15	1	19494	43.7	9.4e-11	1	103358	HUMAN	Inter-alpha-trypsin inhibitor heavy chain H4
[29]		Q14624	6	1119.47	4	-1.2	AFITNFSMIIDGMTYPGIIK	HexNAc4Hex5NeuAc2+Cation:K@5=17	glycopepnew_HCDEThcDiTCIDpeptide_EThcDpd2	66.033	2	19459	51.7	4.9e-14	1	103358	HUMAN	Inter-alpha-trypsin inhibitor heavy chain H4
[9]		P00450	29	961.898	4	1.8	AGLQAFFQVQECNK	HexNAc4Hex5NeuAc2@13	glycopepnew_HCDEThcDiTCIDpeptide_EThcDpd2	46.767	1	13280	35.7	1e-11	1	122206	HUMAN	Ceruloplasmin
[9]		P00450	29	971.385	4	-0.52	AGLQAFFQVQECNK	HexNAc4Hex5NeuAc2+Cation:K@13	glycopepnew_HCDEThcDiTCIDpeptide_EThcDpd2	46.5	1	13188	50.2	1.2e-18	1	122206	HUMAN	Ceruloplasmin
[3]		P00738	120	1155.52	4	2	AKMVSHHNLTTGATLINEQWLLTTAK	HexNAc2Hex8+Cation:K@8	glycopepnew_HCDEThcDiTCIDpeptide_EThcDpd2	41.483	1	11496	14.6	7e-05	1	45205.7	HUMAN	Haptoglobin
[2]		P01876	150	1284.26	3	-2.8	ALEDLLLGSEANLTCTLTGLR	HexNAc4Hex3Fuc2@12	glycopepnew_HCDEThcDiTCIDpeptide_EThcDpd2	48.2	1	13736	18.5	4.3e-05	2	37655	HUMAN	Immunoglobulin heavy constant alpha 1
[7]		P02790	44	913.145	4	0.78	ALPQPQNVTSLLGCTH	HexNAc4Hex5NeuAc@7	glycopepnew_HCDEThcDiTCIDpeptide_EThcDpd2	40.483	1	11151	32.4	9.1e-13	1	51676.8	HUMAN	Hemopexin
[7]		P02790	44	922.632	4	-1.3	ALPQPQNVTSLLGCTH	HexNAc4Hex5NeuAc+Cation:K@7	glycopepnew_HCDEThcDiTCIDpeptide_EThcDpd2	40.533	2	11174	36	5.3e-11	1	51676.8	HUMAN	Hemopexin
[7]		P02790	44	985.92	4	1.7	ALPQPQNVTSLLGCTH	HexNAc4Hex5NeuAc2@7	glycopepnew_HCDEThcDiTCIDpeptide_EThcDpd2	46.967	3	13347	41.5	1.1e-13	1	51676.8	HUMAN	Hemopexin
[7]		P02790	44	995.406	4	-1.5	ALPQPQNVTSLLGCTH	HexNAc4Hex5NeuAc2+Cation:K@7	glycopepnew_HCDEThcDiTCIDpeptide_EThcDpd2	47.25	1	13423	42	8.6e-13	1	51676.8	HUMAN	Hemopexin
[12]		P08185	24	1105.97	4	-0.86	AQLLQGLGFNLTER	HexNAc5Hex6NeuAc3@10||HexNAc6Hex9Fuc+Cation:K@10	glycopepnew_HCDEThcDiTCIDpeptide_EThcDpd2	61.8	1	18114	37.8	9.4e-12	1	45141.3	HUMAN	Corticosteroid-binding globulin
[6]		P02763	91	1247.29	4	1.3	CANLVPVPITNATLDQITGK	HexNAc5Hex6NeuAc3@11=54	glycopepnew_HCDEThcDiTCIDpeptide_EThcDpd2	60	1	17526	28.5	4.4e-08	1	23511.8	HUMAN	Alpha-1-acid glycoprotein 1
[6]		P02763	91	1166.25	4	-5.1	CANLVPVPITNATLDQITGK	HexNAc6Hex7Fuc+Cation:K@11	glycopepnew_HCDEThcDiTCIDpeptide_EThcDpd2	49.533	1	14177	10.5	7.2e-05	1	23511.8	HUMAN	Alpha-1-acid glycoprotein 1
[6]		P02763	91	1193.02	4	-0.45	CANLVPVPITNATLDQITGK	HexNAc6Hex7NeuAc@11=28	glycopepnew_HCDEThcDiTCIDpeptide_EThcDpd2	48.783	2	13928	19.8	5.4e-06	1	23511.8	HUMAN	Alpha-1-acid glycoprotein 1
[6]		P02763	91	1176.25	4	-2.5	CANLVPVPITNATLDQITGK	Pyro-carbamidomethyl@1;HexNAc7Hex7+Cation:K@11	glycopepnew_HCDEThcDiTCIDpeptide_EThcDpd2	58.033	1	16897	13.4	0.00011	1	23511.8	HUMAN	Alpha-1-acid glycoprotein 1
[6-1]	30	P19652	74	1200.49	4	0.45	CANLVPVPITNATLDR	HexNAc5Hex6FucNeuAc3+Cation:K@11	glycopepnew_HCDEThcDiTCIDpeptide_EThcDpd2	53.783	2	15553	31	1.1e-08	1	23602.8	HUMAN	Alpha-1-acid glycoprotein 2
[6-1]	30	P19652	74	1154.49	4	0.81	CANLVPVPITNATLDR	HexNAc5Hex6NeuAc3@11=52	glycopepnew_HCDEThcDiTCIDpeptide_EThcDpd2	54.167	1	15676	30.4	7.3e-07	1	23602.8	HUMAN	Alpha-1-acid glycoprotein 2
[22]		O75882	8	792.043	4	-2.4	CENLTTGK	HexNAc4Hex5NeuAc2+Cation:K@3=11	glycopepnew_HCDEThcDiTCIDpeptide_EThcDpd2	18.867	2	3924	16.1	5.8e-08	1	158538	HUMAN	Attractin
[5]		P02787	86	926.633	4	6.5	CGLVPVLAENYNK	HexNAc4Hex4FucNeuAc2+Cation:K@12	glycopepnew_HCDEThcDiTCIDpeptide_EThcDpd2	43.267	2	12117	38.1	4e-14	1	77064.7	HUMAN	Serotransferrin
[5]		P02787	86	894.369	4	2.9	CGLVPVLAENYNK	HexNAc4Hex5FucNeuAc+Cation:K@12	glycopepnew_HCDEThcDiTCIDpeptide_EThcDpd2	36.2	1	9689	40.8	5.9e-15	1	77064.7	HUMAN	Serotransferrin
[5]		P02787	86	848.363	4	0.81	CGLVPVLAENYNK	HexNAc4Hex5NeuAc@12	glycopepnew_HCDEThcDiTCIDpeptide_EThcDpd2	36.417	1	9765	39.7	9.1e-13	1	77064.7	HUMAN	Serotransferrin
[5]		P02787	86	857.85	4	-1.6	CGLVPVLAENYNK	HexNAc4Hex5NeuAc+Cation:K@12	glycopepnew_HCDEThcDiTCIDpeptide_EThcDpd2	36.433	1	9767	38.1	1.6e-14	1	77064.7	HUMAN	Serotransferrin
[5]		P02787	86	921.139	4	2.3	CGLVPVLAENYNK	HexNAc4Hex5NeuAc2@12	glycopepnew_HCDEThcDiTCIDpeptide_EThcDpd2	43.067	1	12041	45.5	3.5e-14	1	77064.7	HUMAN	Serotransferrin
[5]		P02787	86	1240.49	3	-3.2	CGLVPVLAENYNK	HexNAc4Hex5NeuAc2+Cation:K@12	glycopepnew_HCDEThcDiTCIDpeptide_EThcDpd2	43.317	1	12133	24.5	1.9e-10	1	77064.7	HUMAN	Serotransferrin
[5]		P02787	86	949.133	4	-1.8	CGLVPVLAENYNK	HexNAc5Hex6NeuAc+Cation:K@12	glycopepnew_HCDEThcDiTCIDpeptide_EThcDpd2	35.933	1	9603	29.6	4.7e-09	1	77064.7	HUMAN	Serotransferrin
[5]		P02787	86	1012.42	4	1.5	CGLVPVLAENYNK	HexNAc5Hex6NeuAc2@12	glycopepnew_HCDEThcDiTCIDpeptide_EThcDpd2	43.017	2	12030	36.5	2.4e-12	1	77064.7	HUMAN	Serotransferrin
[5]		P02787	86	1021.91	4	-1.2	CGLVPVLAENYNK	HexNAc5Hex6NeuAc2+Cation:K@12	glycopepnew_HCDEThcDiTCIDpeptide_EThcDpd2	42.95	2	12003	45	4e-17	1	77064.7	HUMAN	Serotransferrin
[5]		P02787	86	1094.68	4	-0.84	CGLVPVLAENYNK	HexNAc5Hex6NeuAc3+Cation:K@12	glycopepnew_HCDEThcDiTCIDpeptide_EThcDpd2	53.117	1	15341	34.7	3.1e-12	1	77064.7	HUMAN	Serotransferrin
[5]		P02787	86	916.88	4	-0.25	CGLVPVLAENYNK	Pyro-carbamidomethyl@1;HexNAc4Hex5NeuAc2@12	glycopepnew_HCDEThcDiTCIDpeptide_EThcDpd2	63.233	2	18569	32	1.2e-11	1	77064.7	HUMAN	Serotransferrin
[5]		P02787	86	926.367	4	-2.3	CGLVPVLAENYNK	Pyro-carbamidomethyl@1;HexNAc4Hex5NeuAc2+Cation:K@12	glycopepnew_HCDEThcDiTCIDpeptide_EThcDpd2	63.383	1	18612	27.9	6.8e-10	1	77064.7	HUMAN	Serotransferrin
[5]		P02787	86	936.615	4	-4.3	CGLVPVLAENYNKSD	HexNAc2Hex10+Cation:K@12	glycopepnew_HCDEThcDiTCIDpeptide_EThcDpd2	43.2	1	12093	31.6	2.3e-12	1	77064.7	HUMAN	Serotransferrin
[7]		P02790	44	1202.94	4	3.6	CSDGWSFDATTLDDN	HexNAc8Hex8Fuc+Cation:K@15	glycopepnew_HCDEThcDiTCIDpeptide_EThcDpd2	62.067	2	18209	16	2.1e-06	1	51676.8	HUMAN	Hemopexin
[7]		P02790	44	1364.51	4	5.4	CSDGWSFDATTLDDNGTM	HexNAc7Hex8FucNeuAc2@15;Oxidation@18=32	glycopepnew_HCDEThcDiTCIDpeptide_EThcDpd2	73.7	1	21916	16	5.7e-07	1	51676.8	HUMAN	Hemopexin
[7]		P02790	44	1189.46	4	4.3	CSDGWSFDATTLDDNGTMLFFK	HexNAc4Hex4FucNeuAc2+Cation:K@15=120	glycopepnew_HCDEThcDiTCIDpeptide_EThcDpd2	61.967	1	18168	62.9	5.1e-17	1	51676.8	HUMAN	Hemopexin
[7]		P02790	44	1184.22	4	-4.4	CSDGWSFDATTLDDNGTMLFFK	HexNAc4Hex5Fuc2NeuAc@15=9	glycopepnew_HCDEThcDiTCIDpeptide_EThcDpd2	62.767	1	18426	33.2	1.5e-09	1	51676.8	HUMAN	Hemopexin
[7]		P02790	44	1220.48	4	-0.88	CSDGWSFDATTLDDNGTMLFFK	HexNAc4Hex5FucNeuAc2@15=76	glycopepnew_HCDEThcDiTCIDpeptide_EThcDpd2	61.817	1	18121	32.8	3.4e-13	1	51676.8	HUMAN	Hemopexin
[7]		P02790	44	1111.2	4	2.1	CSDGWSFDATTLDDNGTMLFFK	HexNAc4Hex5NeuAc@15=30	glycopepnew_HCDEThcDiTCIDpeptide_EThcDpd2	54.283	2	15719	35.8	9.8e-14	1	51676.8	HUMAN	Hemopexin
[7]		P02790	44	1120.68	4	-0.59	CSDGWSFDATTLDDNGTMLFFK	HexNAc4Hex5NeuAc+Cation:K@15=43	glycopepnew_HCDEThcDiTCIDpeptide_EThcDpd2	54.3	1	15721	68.6	7.3e-23	1	51676.8	HUMAN	Hemopexin
[7]		P02790	44	1187.96	4	-1.9	CSDGWSFDATTLDDNGTMLFFK	HexNAc4Hex5NeuAc2@15;Oxidation@18	glycopepnew_HCDEThcDiTCIDpeptide_EThcDpd2	58.25	2	16975	46.3	1.9e-17	1	51676.8	HUMAN	Hemopexin
[7]		P02790	44	1183.97	4	0.4	CSDGWSFDATTLDDNGTMLFFK	HexNAc4Hex5NeuAc2@15=127	glycopepnew_HCDEThcDiTCIDpeptide_EThcDpd2	61.883	2	18143	50.2	4.7e-18	1	51676.8	HUMAN	Hemopexin
[7]		P02790	44	1193.45	4	-1.9	CSDGWSFDATTLDDNGTMLFFK	HexNAc4Hex5NeuAc2+Cation:K@15=27	glycopepnew_HCDEThcDiTCIDpeptide_EThcDpd2	61.9	1	18148	66	4.9e-18	1	51676.8	HUMAN	Hemopexin
[7]		P02790	44	1394.02	4	-2.2	CSDGWSFDATTLDDNGTMLFFK	HexNAc5Hex6FucNeuAc3+Cation:K@15	glycopepnew_HCDEThcDiTCIDpeptide_EThcDpd2	73.367	1	21812	11.6	2.3e-05	1	51676.8	HUMAN	Hemopexin
[7]		P02790	44	1189.2	4	-0.46	CSDGWSFDATTLDDNGTMLFFK	Pyro-carbamidomethyl@1;HexNAc2Hex11+Cation:K&Oxidation@(15&5)||HexNAc4Hex4FucNeuAc2+Cation:K&Oxidation@(15&5)||HexNAc4Hex5NeuAc2+Cation:K@15	glycopepnew_HCDEThcDiTCIDpeptide_EThcDpd2	80.233	2	23988	28.3	2.3e-08	1	51676.8	HUMAN	Hemopexin
[7]		P02790	44	1183.97	4	0.71	CSDGWSFDATTLDDNGTMLFFK	Pyro-carbamidomethyl@1;HexNAc4Hex5Fuc2NeuAc@15=23;Oxidation@18=23	glycopepnew_HCDEThcDiTCIDpeptide_EThcDpd2	75.633	1	22537	29.8	1.2e-10	1	51676.8	HUMAN	Hemopexin
[7]		P02790	44	1193.2	4	-1.7	CSDGWSFDATTLDDNGTMLFFK	Pyro-carbamidomethyl@1;HexNAc4Hex5NeuAc2+Cation:K@15;Oxidation@18=21	glycopepnew_HCDEThcDiTCIDpeptide_EThcDpd2	75.783	1	22586	12.3	1.5e-05	1	51676.8	HUMAN	Hemopexin
[7]		P02790	44	1193.97	4	0.75	CSDGWSFDATTLDDNGTMLFFK	Pyro-carbamidomethyl@1;HexNAc5Hex4NeuAc2@15=52;Oxidation@18=39	glycopepnew_HCDEThcDiTCIDpeptide_EThcDpd2	59.883	1	17489	23.2	1.5e-09	1	51676.8	HUMAN	Hemopexin
[7]		P02790	44	1201.45	4	-2.6	CSDGWSFDATTLDDNGTMLFFK	Pyro-carbamidomethyl@1=28;Oxidation@5=27;HexNAc4Hex7NeuAc+Cation:K@15=28	glycopepnew_HCDEThcDiTCIDpeptide_EThcDpd2	80.533	2	24070	10.8	1.9e-05	1	51676.8	HUMAN	Hemopexin
[7]		P02790	44	1363.76	4	-5.2	CSDGWSFDATTLDDNGTMLFFKGE	HexNAc5Hex5Fuc2NeuAc2+Cation:K@15	glycopepnew_HCDEThcDiTCIDpeptide_EThcDpd2	73.933	2	21997	16.3	7.9e-06	1	51676.8	HUMAN	Hemopexin
[21]		P43652	10	860.326	4	-1.1	DIENFNSTQK	HexNAc4Hex5NeuAc2+Cation:K@6	glycopepnew_HCDEThcDiTCIDpeptide_EThcDpd2	28.933	1	7269	39.5	1.8e-13	1	69069.8	HUMAN	Afamin
[20]		P25311	11	1104.95	4	2.3	DIVEYYNDSNGSHVLQGR	HexNAc4Hex5FucNeuAc2@7|10	glycopepnew_HCDEThcDiTCIDpeptide_EThcDpd2	34.117	1	8993	17.9	2.8e-06	1	34259	HUMAN	Zinc-alpha-2-glycoprotein
[20]		P25311	11	1077.93	4	-1.5	DIVEYYNDSNGSHVLQGR	HexNAc4Hex5NeuAc2+Cation:K@7=11	glycopepnew_HCDEThcDiTCIDpeptide_EThcDpd2	34.55	1	9130	37.6	1.1e-13	1	34259	HUMAN	Zinc-alpha-2-glycoprotein
[42]		P43251	2	890.173	5	-1.4	DVQIIVFPEDGIHGFNFTR	HexNAc4Hex5NeuAc2+Cation:K@16	glycopepnew_HCDEThcDiTCIDpeptide_EThcDpd2	54.267	1	15709	41	2.8e-11	1	61133.5	HUMAN	Biotinidase
[10-1]	19	P01859	24	804.301	4	-1.3	EEQFNSTFR	HexNAc3Hex6FucNeuAc+Cation:K@5	glycopepnew_HCDEThcDiTCIDpeptide_EThcDpd2	24.467	1	5824	20.6	9.4e-08	1	35901	HUMAN	Immunoglobulin heavy constant gamma 2
[10-1]	19	P01859	24	819.34	3	3.2	EEQFNSTFR	HexNAc4Hex3@5	glycopepnew_HCDEThcDiTCIDpeptide_EThcDpd2	20.283	2	4421	19.2	4.5e-05	1	35901	HUMAN	Immunoglobulin heavy constant gamma 2
[10-1]	19	P01859	24	886.009	3	1.9	EEQFNSTFR	HexNAc4Hex4+Cation:K@5	glycopepnew_HCDEThcDiTCIDpeptide_EThcDpd2	20.05	1	4329	17.3	0.00016	1	35901	HUMAN	Immunoglobulin heavy constant gamma 2
[10-1]	19	P01859	24	701.27	4	-2.5	EEQFNSTFR	HexNAc4Hex4Fuc+Cation:K@5	glycopepnew_HCDEThcDiTCIDpeptide_EThcDpd2	22.033	1	5016	22.7	2.1e-08	1	35901	HUMAN	Immunoglobulin heavy constant gamma 2
[10-1]	19	P01859	24	774.044	4	-1.5	EEQFNSTFR	HexNAc4Hex4FucNeuAc+Cation:K@5	glycopepnew_HCDEThcDiTCIDpeptide_EThcDpd2	24.65	1	5884	28.1	1.7e-06	1	35901	HUMAN	Immunoglobulin heavy constant gamma 2
[10-1]	19	P01859	24	976.059	3	0.15	EEQFNSTFR	HexNAc4Hex5Fuc@5	glycopepnew_HCDEThcDiTCIDpeptide_EThcDpd2	20.167	1	4375	18.8	2.9e-07	1	35901	HUMAN	Immunoglobulin heavy constant gamma 2
[10-1]	19	P01859	24	741.784	4	-1.6	EEQFNSTFR	HexNAc4Hex5Fuc+Cation:K@5	glycopepnew_HCDEThcDiTCIDpeptide_EThcDpd2	19.683	1	4203	22.9	0.00011	1	35901	HUMAN	Immunoglobulin heavy constant gamma 2
[10-1]	19	P01859	24	814.557	4	-1.9	EEQFNSTFR	HexNAc4Hex5FucNeuAc+Cation:K@5	glycopepnew_HCDEThcDiTCIDpeptide_EThcDpd2	23.617	1	5540	25.9	2.7e-10	1	35901	HUMAN	Immunoglobulin heavy constant gamma 2
[10-1]	19	P01859	24	989.735	3	0.48	EEQFNSTFR	HexNAc5Hex4Fuc@5	glycopepnew_HCDEThcDiTCIDpeptide_EThcDpd2	20.2	2	4392	15.2	1.7e-05	1	35901	HUMAN	Immunoglobulin heavy constant gamma 2
[10-1]	19	P01859	24	752.04	4	-1.5	EEQFNSTFR	HexNAc5Hex4Fuc+Cation:K@5	glycopepnew_HCDEThcDiTCIDpeptide_EThcDpd2	19.45	1	4123	31.2	4.6e-06	1	35901	HUMAN	Immunoglobulin heavy constant gamma 2
[10-2]	12	P01861	15	873.355	3	-0.43	EEQFNSTYR	HexNAc4Hex3Fuc@5	glycopepnew_HCDEThcDiTCIDpeptide_EThcDpd2	17.05	1	3293	20.3	4.6e-09	1	35940.9	HUMAN	Immunoglobulin heavy constant gamma 4
[10-2]	12	P01861	15	927.372	3	-0.37	EEQFNSTYR	HexNAc4Hex4Fuc@5	glycopepnew_HCDEThcDiTCIDpeptide_EThcDpd2	17.133	2	3327	24.3	1.4e-09	1	35940.9	HUMAN	Immunoglobulin heavy constant gamma 4
[10-2]	12	P01861	15	778.043	4	-1.9	EEQFNSTYR	HexNAc4Hex4FucNeuAc+Cation:K@5	glycopepnew_HCDEThcDiTCIDpeptide_EThcDpd2	20.333	1	4435	12.5	6.7e-06	1	35940.9	HUMAN	Immunoglobulin heavy constant gamma 4
[10-2]	12	P01861	15	745.782	4	-2.2	EEQFNSTYR	HexNAc4Hex5Fuc+Cation:K@5	glycopepnew_HCDEThcDiTCIDpeptide_EThcDpd2	16.717	1	3174	25.7	5.5e-10	1	35940.9	HUMAN	Immunoglobulin heavy constant gamma 4
[10-2]	12	P01861	15	1083.75	3	-0.61	EEQFNSTYR	HexNAc4Hex6NeuAc@5	glycopepnew_HCDEThcDiTCIDpeptide_EThcDpd2	17.1	2	3313	15.6	3.8e-05	1	35940.9	HUMAN	Immunoglobulin heavy constant gamma 4
[10-2]	12	P01861	15	941.048	3	0.047	EEQFNSTYR	HexNAc5Hex3Fuc@5	glycopepnew_HCDEThcDiTCIDpeptide_EThcDpd2	17.15	1	3329	10	3e-05	1	35940.9	HUMAN	Immunoglobulin heavy constant gamma 4
[10-2]	12	P01861	15	995.066	3	-0.42	EEQFNSTYR	HexNAc5Hex4Fuc@5	glycopepnew_HCDEThcDiTCIDpeptide_EThcDpd2	17.083	1	3304	15.1	4.5e-06	1	35940.9	HUMAN	Immunoglobulin heavy constant gamma 4
[10-2]	12	P01861	15	756.038	4	-3	EEQFNSTYR	HexNAc5Hex4Fuc+Cation:K@5	glycopepnew_HCDEThcDiTCIDpeptide_EThcDpd2	17	1	3273	34.2	2.5e-11	1	35940.9	HUMAN	Immunoglobulin heavy constant gamma 4
[10]		P01857	29	877.659	3	-4.6	EEQYNSTYR	HexNAc3Hex4Fuc+Cation:K@5	glycopepnew_HCDEThcDiTCIDpeptide_EThcDpd2	15.183	3	2622	20.9	3.5e-05	1	36106.2	HUMAN	Immunoglobulin heavy constant gamma 1
[10]		P01857	29	830	3	-0.8	EEQYNSTYR	HexNAc4Hex3@5	glycopepnew_HCDEThcDiTCIDpeptide_EThcDpd2	15.383	1	2696	31.2	3.5e-07	1	36106.2	HUMAN	Immunoglobulin heavy constant gamma 1
[10]		P01857	29	878.687	3	-0.045	EEQYNSTYR	HexNAc4Hex3Fuc@5	glycopepnew_HCDEThcDiTCIDpeptide_EThcDpd2	15.367	1	2689	18.3	2.3e-08	1	36106.2	HUMAN	Immunoglobulin heavy constant gamma 1
[10]		P01857	29	884.017	3	-1.5	EEQYNSTYR	HexNAc4Hex4@5	glycopepnew_HCDEThcDiTCIDpeptide_EThcDpd2	15.25	1	2641	24	0.00012	1	36106.2	HUMAN	Immunoglobulin heavy constant gamma 1
[10]		P01857	29	896.668	3	-2.9	EEQYNSTYR	HexNAc4Hex4+Cation:K@5	glycopepnew_HCDEThcDiTCIDpeptide_EThcDpd2	15.317	2	2670	15.6	8.5e-07	1	36106.2	HUMAN	Immunoglobulin heavy constant gamma 1
[10]		P01857	29	932.704	3	-0.73	EEQYNSTYR	HexNAc4Hex4Fuc@5	glycopepnew_HCDEThcDiTCIDpeptide_EThcDpd2	15.117	2	2596	11.7	0.00011	1	36106.2	HUMAN	Immunoglobulin heavy constant gamma 1
[10]		P01857	29	709.267	4	-2.4	EEQYNSTYR	HexNAc4Hex4Fuc+Cation:K@5	glycopepnew_HCDEThcDiTCIDpeptide_EThcDpd2	15.033	1	2567	13.6	5.6e-05	1	36106.2	HUMAN	Immunoglobulin heavy constant gamma 1
[10]		P01857	29	713.266	4	-3.2	EEQYNSTYR	HexNAc4Hex5+Cation:K@5	glycopepnew_HCDEThcDiTCIDpeptide_EThcDpd2	15.2	1	2628	22.7	7.5e-09	1	36106.2	HUMAN	Immunoglobulin heavy constant gamma 1
[10]		P01857	29	986.723	3	0.58	EEQYNSTYR	HexNAc4Hex5Fuc@5	glycopepnew_HCDEThcDiTCIDpeptide_EThcDpd2	15.133	2	2601	20.6	2.3e-06	1	36106.2	HUMAN	Immunoglobulin heavy constant gamma 1
[10]		P01857	29	749.78	4	-3.3	EEQYNSTYR	HexNAc4Hex5Fuc+Cation:K@5	glycopepnew_HCDEThcDiTCIDpeptide_EThcDpd2	15.217	1	2630	26.6	5.8e-06	1	36106.2	HUMAN	Immunoglobulin heavy constant gamma 1
[10]		P01857	29	1083.75	3	-0.61	EEQYNSTYR	HexNAc4Hex5FucNeuAc@5	glycopepnew_HCDEThcDiTCIDpeptide_EThcDpd2	17.1	2	3313	15.6	3.8e-05	1	36106.2	HUMAN	Immunoglobulin heavy constant gamma 1
[10]		P01857	29	822.555	4	-1.4	EEQYNSTYR	HexNAc4Hex5FucNeuAc+Cation:K@5	glycopepnew_HCDEThcDiTCIDpeptide_EThcDpd2	17.567	1	3473	23.1	4e-06	1	36106.2	HUMAN	Immunoglobulin heavy constant gamma 1
[10]		P01857	29	895.328	4	-1.9	EEQYNSTYR	HexNAc4Hex5FucNeuAc2+Cation:K@5	glycopepnew_HCDEThcDiTCIDpeptide_EThcDpd2	20.867	1	4627	10.3	0.00016	1	36106.2	HUMAN	Immunoglobulin heavy constant gamma 1
[10]		P01857	29	719.524	4	-2.7	EEQYNSTYR	HexNAc5Hex3Fuc+Cation:K@5	glycopepnew_HCDEThcDiTCIDpeptide_EThcDpd2	15.517	2	2748	24.4	3.7e-08	1	36106.2	HUMAN	Immunoglobulin heavy constant gamma 1
[10]		P01857	29	1000.4	3	-0.26	EEQYNSTYR	HexNAc5Hex4Fuc@5	glycopepnew_HCDEThcDiTCIDpeptide_EThcDpd2	15.417	1	2708	20	8.3e-08	1	36106.2	HUMAN	Immunoglobulin heavy constant gamma 1
[16]		P04217	15	1208.9	5	-0.88	EGDHEFLEVPEAQEDVEATFPVHQPGNYSCSYRTD	HexNAc5Hex6@27	glycopepnew_HCDEThcDiTCIDpeptide_EThcDpd2	42.083	1	11698	36.4	1.2e-12	1	54254	HUMAN	Alpha-1B-glycoprotein
[16]		P04217	15	1337.74	5	-7.7	EGDHEFLEVPEAQEDVEATFPVHQPGNYSCSYRTDGEGAL	HexNAc4Hex5NeuAc2@27	glycopepnew_HCDEThcDiTCIDpeptide_EThcDpd2	41.55	1	11518	16	2e-05	1	54254	HUMAN	Alpha-1B-glycoprotein
[9]		P00450	29	1225.73	4	0.33	EHEGAIYPDNTTDFQR	HexNAc5Hex6FucNeuAc3@10	glycopepnew_HCDEThcDiTCIDpeptide_EThcDpd2	34	1	8953	16.9	2.1e-05	1	122206	HUMAN	Ceruloplasmin
[9]		P00450	29	1198.7	4	-2.3	EHEGAIYPDNTTDFQR	HexNAc5Hex6NeuAc3+Cation:K@10	glycopepnew_HCDEThcDiTCIDpeptide_EThcDpd2	33.683	2	8845	45	9.2e-10	1	122206	HUMAN	Ceruloplasmin
[9]		P00450	29	1017.99	5	-2.1	EHEGAIYPDNTTDFQR	HexNAc7Hex8FucNeuAc+Cation:K@10	glycopepnew_HCDEThcDiTCIDpeptide_EThcDpd2	33.367	1	8734	17.6	6.2e-06	1	122206	HUMAN	Ceruloplasmin
[9]		P00450	29	882.963	5	-0.96	ELHHLQEQNVSNAFLDK	HexNAc2Hex12+Cation:K@9||HexNAc4Hex5FucNeuAc2+Cation:K@9	glycopepnew_HCDEThcDiTCIDpeptide_EThcDpd2	28.017	1	6979	57.2	1.2e-22	1	122206	HUMAN	Ceruloplasmin
[9]		P00450	29	1057.7	4	-7.1	ELHHLQEQNVSNAFLDK	HexNAc4Hex5Fuc2NeuAc@9=22	glycopepnew_HCDEThcDiTCIDpeptide_EThcDpd2	27.2	1	6709	35.1	9e-12	1	122206	HUMAN	Ceruloplasmin
[9]		P00450	29	1094.21	4	-2.9	ELHHLQEQNVSNAFLDK	HexNAc4Hex5Fuc3NeuAc@9||HexNAc9Hex3+Cation:K@9	glycopepnew_HCDEThcDiTCIDpeptide_EThcDpd2	29.217	1	7361	37.8	3.2e-12	1	122206	HUMAN	Ceruloplasmin
[9]		P00450	29	1093.96	4	-1.1	ELHHLQEQNVSNAFLDK	HexNAc4Hex5FucNeuAc2@9	glycopepnew_HCDEThcDiTCIDpeptide_EThcDpd2	28.3	2	7071	47	2.3e-13	1	122206	HUMAN	Ceruloplasmin
[9]		P00450	29	795.532	5	-1.7	ELHHLQEQNVSNAFLDK	HexNAc4Hex5NeuAc+Cation:K@9	glycopepnew_HCDEThcDiTCIDpeptide_EThcDpd2	24.85	1	5962	50.8	5.1e-16	1	122206	HUMAN	Ceruloplasmin
[9]		P00450	29	1057.45	4	1.3	ELHHLQEQNVSNAFLDK	HexNAc4Hex5NeuAc2@9	glycopepnew_HCDEThcDiTCIDpeptide_EThcDpd2	28.3	1	7069	58.6	5.7e-21	1	122206	HUMAN	Ceruloplasmin
[9]		P00450	29	1185.25	4	-0.93	ELHHLQEQNVSNAFLDK	HexNAc5Hex6FucNeuAc2@9	glycopepnew_HCDEThcDiTCIDpeptide_EThcDpd2	27.767	1	6904	31.5	3.2e-09	1	122206	HUMAN	Ceruloplasmin
[6]		P02763	91	919.59	4	-1.8	ENGTISR	HexNAc5Hex6NeuAc3+Cation:K@2	glycopepnew_HCDEThcDiTCIDpeptide_EThcDpd2	22.383	1	5131	32.2	5e-06	1	23511.8	HUMAN	Alpha-1-acid glycoprotein 1
[6]		P02763	91	1010.88	4	0.32	ENGTISR	HexNAc6Hex7NeuAc3+Cation:K@2	glycopepnew_HCDEThcDiTCIDpeptide_EThcDpd2	20.817	1	4607	22.9	5.9e-08	1	23511.8	HUMAN	Alpha-1-acid glycoprotein 1
[6]		P02763	91	1083.65	4	-0.19	ENGTISR	HexNAc6Hex7NeuAc4+Cation:K@2	glycopepnew_HCDEThcDiTCIDpeptide_EThcDpd2	31.917	1	8255	25.9	3e-05	1	23511.8	HUMAN	Alpha-1-acid glycoprotein 1
[6-1]	30	P19652	74	952.6	4	-2.2	ENGTVSR	HexNAc5Hex6FucNeuAc3+Cation:K@2	glycopepnew_HCDEThcDiTCIDpeptide_EThcDpd2	18.567	1	3821	16.8	1.5e-05	1	23602.8	HUMAN	Alpha-1-acid glycoprotein 2
[6-1]	30	P19652	74	906.599	4	-0.05	ENGTVSR	HexNAc5Hex6NeuAc3@2	glycopepnew_HCDEThcDiTCIDpeptide_EThcDpd2	18.433	1	3773	17.8	1.8e-07	1	23602.8	HUMAN	Alpha-1-acid glycoprotein 2
[6-1]	30	P19652	74	916.087	4	-1.4	ENGTVSR	HexNAc5Hex6NeuAc3+Cation:K@2	glycopepnew_HCDEThcDiTCIDpeptide_EThcDpd2	18.883	2	3931	25.5	2.5e-09	1	23602.8	HUMAN	Alpha-1-acid glycoprotein 2
[6-1]	30	P19652	74	1007.37	4	0.21	ENGTVSR	HexNAc6Hex7NeuAc3+Cation:K@2	glycopepnew_HCDEThcDiTCIDpeptide_EThcDpd2	18.333	3	3743	29.4	3.3e-07	1	23602.8	HUMAN	Alpha-1-acid glycoprotein 2
[36]		P01591	4	905.105	4	-1.4	ENISDPTSPLR	HexNAc4Hex5FucNeuAc2+Cation:K@2	glycopepnew_HCDEThcDiTCIDpeptide_EThcDpd2	32.567	2	8464	34.1	6.5e-12	1	18098.8	HUMAN	Immunoglobulin J chain
[9]		P00450	29	1084.2	4	-7.2	ENLTAPGSDSAVFFEQGTTR	HexNAc4Hex5Fuc4@2=8	glycopepnew_HCDEThcDiTCIDpeptide_EThcDpd2	44.367	1	12477	31.3	4.7e-07	1	122206	HUMAN	Ceruloplasmin
[9]		P00450	29	1083.7	4	0.62	ENLTAPGSDSAVFFEQGTTR	HexNAc4Hex5NeuAc2@2	glycopepnew_HCDEThcDiTCIDpeptide_EThcDpd2	44.483	1	12509	56.1	1.1e-15	1	122206	HUMAN	Ceruloplasmin
[9]		P00450	29	1093.19	4	-0.0034	ENLTAPGSDSAVFFEQGTTR	HexNAc4Hex5NeuAc2+Cation:K@2	glycopepnew_HCDEThcDiTCIDpeptide_EThcDpd2	44.683	2	12585	27.7	1.7e-07	1	122206	HUMAN	Ceruloplasmin
[40]		P04070	2	856.852	4	1	EVFVHPNYSK	HexNAc4Hex5NeuAc2@7	glycopepnew_HCDEThcDiTCIDpeptide_EThcDpd2	24.667	2	5890	33.5	9.5e-12	1	52071.8	HUMAN	Vitamin K-dependent protein C
[40]		P04070	2	866.34	4	-0.25	EVFVHPNYSK	HexNAc4Hex5NeuAc2+Cation:K@7	glycopepnew_HCDEThcDiTCIDpeptide_EThcDpd2	22.117	1	5040	37.3	1.9e-13	1	52071.8	HUMAN	Vitamin K-dependent protein C
[1]		P01009	159	1176.56	5	7.2	FAMLSLGTKADTHDEILEGLNFNLTEIPEAQIHEGFQELLR	HexNAc2Hex3Fuc2+Cation:K&Oxidation@(23&3)||HexNAc2Hex4Fuc+Cation:K@23	glycopepnew_HCDEThcDiTCIDpeptide_EThcDpd2	53.35	1	15417	15	2.9e-05	1	46736.9	HUMAN	Alpha-1-antitrypsin
[20]		P25311	11	846.061	4	-0.17	FGCEIENNR	HexNAc4Hex5NeuAc2+Cation:K@8	glycopepnew_HCDEThcDiTCIDpeptide_EThcDpd2	24.667	1	5886	32	8.1e-11	1	34259	HUMAN	Zinc-alpha-2-glycoprotein
[34]		P05156	4	816.562	4	-2.6	FLNNGTCTAEGK	HexNAc4Hex5NeuAc+Cation:K@4	glycopepnew_HCDEThcDiTCIDpeptide_EThcDpd2	18.883	1	3929	18	8.5e-05	1	65751	HUMAN	Complement factor I
[34]		P05156	4	889.336	4	-1.7	FLNNGTCTAEGK	HexNAc4Hex5NeuAc2+Cation:K@4	glycopepnew_HCDEThcDiTCIDpeptide_EThcDpd2	23.567	1	5523	42.1	2.1e-15	1	65751	HUMAN	Complement factor I
[21]		P43652	10	778.538	4	-1.5	FNETTEK	HexNAc4Hex5NeuAc2+Cation:K@2	glycopepnew_HCDEThcDiTCIDpeptide_EThcDpd2	18.167	2	3674	27.8	7.8e-06	1	69069.8	HUMAN	Afamin
[9]		P00450	29	824.557	4	-1.1	FQVQECNK	HexNAc4Hex5NeuAc2+Cation:K@7	glycopepnew_HCDEThcDiTCIDpeptide_EThcDpd2	21.9	1	4971	23.5	1.1e-08	1	122206	HUMAN	Ceruloplasmin
[11]		P01011	24	1019.12	6	1.5	FSPLSISTALAFLSLGAHNTTLTEILK	HexNAc6Hex7NeuAc3+Cation:K@19	glycopepnew_HCDEThcDiTCIDpeptide_EThcDpd2	76.95	1	22957	15.2	2.2e-06	1	47651.3	HUMAN	Alpha-1-antichymotrypsin
[4]		P01023	96	1188.02	4	-2.3	GCVLLSYLNETVTVSASLESVR	HexNAc4Hex5Fuc3NeuAc@9||HexNAc9Hex3+Cation:K@9	glycopepnew_HCDEThcDiTCIDpeptide_EThcDpd2	69.967	2	20708	33	4.3e-09	1	163292	HUMAN	Alpha-2-macroglobulin
[4]		P01023	96	1187.77	4	3	GCVLLSYLNETVTVSASLESVR	HexNAc4Hex5FucNeuAc2@9	glycopepnew_HCDEThcDiTCIDpeptide_EThcDpd2	69.183	1	20454	24.6	8.7e-07	1	163292	HUMAN	Alpha-2-macroglobulin
[4]		P01023	96	1087.98	4	4.4	GCVLLSYLNETVTVSASLESVR	HexNAc4Hex5NeuAc+Cation:K@9	glycopepnew_HCDEThcDiTCIDpeptide_EThcDpd2	71.267	1	21139	19.4	2.4e-07	1	163292	HUMAN	Alpha-2-macroglobulin
[4]		P01023	96	1151.26	4	1.2	GCVLLSYLNETVTVSASLESVR	HexNAc4Hex5NeuAc2@9	glycopepnew_HCDEThcDiTCIDpeptide_EThcDpd2	68.1	2	20106	40.6	2e-10	1	163292	HUMAN	Alpha-2-macroglobulin
[4]		P01023	96	1160.75	4	3.6	GCVLLSYLNETVTVSASLESVR	HexNAc4Hex5NeuAc2+Cation:K@9	glycopepnew_HCDEThcDiTCIDpeptide_EThcDpd2	64.717	1	19040	48.3	9.4e-15	1	163292	HUMAN	Alpha-2-macroglobulin
[20]		P25311	11	1387.35	4	0.46	GDVLHNGNGTYQSWVVVAVPPQDTAPYSCHVQH	HexNAc4Hex4FucNeuAc&Oxidation@(8&14)||HexNAc4Hex5NeuAc@8	glycopepnew_HCDEThcDiTCIDpeptide_EThcDpd2	37.083	1	9988	33.9	8.3e-15	1	34259	HUMAN	Zinc-alpha-2-glycoprotein
[20]		P25311	11	1387.6	4	-4.8	GDVLHNGNGTYQSWVVVAVPPQDTAPYSCHVQH	HexNAc4Hex5Fuc2@8=13	glycopepnew_HCDEThcDiTCIDpeptide_EThcDpd2	37.367	1	10084	15.9	1.6e-07	1	34259	HUMAN	Zinc-alpha-2-glycoprotein
[20]		P25311	11	1224.2	6	0.55	GDVLHNGNGTYQSWVVVAVPPQDTAPYSCHVQHSSLAQPLVVPWEAS	HexNAc2Hex11+Cation:K&Oxidation@(8&14)||HexNAc4Hex4FucNeuAc2+Cation:K&Oxidation@(8&14)||HexNAc4Hex5NeuAc2+Cation:K@8	glycopepnew_HCDEThcDiTCIDpeptide_EThcDpd2	49.75	2	14248	21.4	1.7e-07	1	34259	HUMAN	Zinc-alpha-2-glycoprotein
[25]		Q96PD5	5	1074.73	4	1.2	GFGVAIVGNYTAALPTEAALR	HexNAc4Hex5NeuAc2@9	glycopepnew_HCDEThcDiTCIDpeptide_EThcDpd2	53.983	1	15615	52.2	4.8e-15	1	62217.6	HUMAN	N-acetylmuramoyl-L-alanine amidase
[25]		Q96PD5	5	1084.22	4	-0.88	GFGVAIVGNYTAALPTEAALR	HexNAc4Hex5NeuAc2+Cation:K@9	glycopepnew_HCDEThcDiTCIDpeptide_EThcDpd2	54.15	2	15669	72.8	8e-20	1	62217.6	HUMAN	N-acetylmuramoyl-L-alanine amidase
[7]		P02790	44	777.313	6	-5.5	GHGHRNGTGHGNSTHHGPEYMR	HexNAc5Hex5FucNeuAc@12=16	glycopepnew_HCDEThcDiTCIDpeptide_EThcDpd2	14.2	2	2297	40.6	1.9e-08	1	51676.8	HUMAN	Hemopexin
[1]		P01009	159	1189.71	5	-4.2	GLNFNLTEIPEAQIHEGFQELLR	HexNAc6Hex10FucNeuAc@5	glycopepnew_HCDEThcDiTCIDpeptide_EThcDpd2	61.267	1	17946	16	4.3e-07	1	46736.9	HUMAN	Alpha-1-antitrypsin
[24]		P0C0L4	6	837.588	4	-0.17	GLNVTLSSTGR	HexNAc4Hex5NeuAc2+Cation:K@3	glycopepnew_HCDEThcDiTCIDpeptide_EThcDpd2	33.583	1	8808	42.5	2.9e-15	1	192787	HUMAN	Complement C4-A
[13]		P01871	15	1182.72	4	-2.9	GLTFQQNASSMCVPDQDTAIR	HexNAc2Hex12+Cation:K@7||HexNAc4Hex5FucNeuAc2+Cation:K@7	glycopepnew_HCDEThcDiTCIDpeptide_EThcDpd2	40.6	2	11193	34.3	5.1e-09	1	49440.2	HUMAN	Immunoglobulin heavy constant mu
[13]		P01871	15	1156.72	4	2.4	GLTFQQNASSMCVPDQDTAIR	HexNAc5Hex4Fuc2NeuAc+Cation:K@7=39	glycopepnew_HCDEThcDiTCIDpeptide_EThcDpd2	35.45	2	9441	51.6	1.1e-11	1	49440.2	HUMAN	Immunoglobulin heavy constant mu
[13]		P01871	15	1110.72	4	1.3	GLTFQQNASSMCVPDQDTAIR	HexNAc5Hex4FucNeuAc@7	glycopepnew_HCDEThcDiTCIDpeptide_EThcDpd2	35.733	3	9540	17.4	3.8e-06	1	49440.2	HUMAN	Immunoglobulin heavy constant mu
[13]		P01871	15	1120.2	4	-0.48	GLTFQQNASSMCVPDQDTAIR	HexNAc5Hex4FucNeuAc+Cation:K@7	glycopepnew_HCDEThcDiTCIDpeptide_EThcDpd2	35.667	1	9513	36.6	2.2e-11	1	49440.2	HUMAN	Immunoglobulin heavy constant mu
[13]		P01871	15	1187.49	4	1.5	GLTFQQNASSMCVPDQDTAIR	HexNAc5Hex4FucNeuAc2&Oxidation@(7&11)||HexNAc5Hex5NeuAc2@7	glycopepnew_HCDEThcDiTCIDpeptide_EThcDpd2	29.35	1	7404	29.9	7.6e-08	1	49440.2	HUMAN	Immunoglobulin heavy constant mu
[3]		P00738	120	1190.34	5	0.92	GSFPWQAKMVSHHNLTTGATLINEQWLLTTAK	HexNAc4Hex5FucNeuAc2@14;Oxidation@9|26	glycopepnew_HCDEThcDiTCIDpeptide_EThcDpd2	41.733	1	11581	49.8	5.7e-12	1	45205.7	HUMAN	Haptoglobin
[30]		P01042	5	1207.26	4	-0.21	HGIQYFNNNTQHSSLFMLNEVK	HexNAc4Hex5NeuAc2@8	glycopepnew_HCDEThcDiTCIDpeptide_EThcDpd2	36.467	2	9781	44.2	2.8e-15	1	71958	HUMAN	Kininogen-1
[30]		P01042	5	1367.07	4	7.7	HGIQYFNNNTQHSSLFMLNEVK	HexNAc6Hex8NeuAc+Cation:K@8=14	glycopepnew_HCDEThcDiTCIDpeptide_EThcDpd2	36.3	2	9722	29.5	1.7e-09	1	71958	HUMAN	Kininogen-1
[29]		Q14624	6	1337.58	5	6.8	HLQMDIHIFEPQGISFLETESTFMTNQLVDALTTWQN	Oxidation@4=66;HexNAc5Hex6NeuAc+Cation:K@37;Oxidation@24|35	glycopepnew_HCDEThcDiTCIDpeptide_EThcDpd2	65.3	1	19226	19	1.8e-07	1	103358	HUMAN	Inter-alpha-trypsin inhibitor heavy chain H4
[14]		P01019	14	1109.82	3	0.46	HLVIHNESTCEQLAK	HexNAc3Hex4NeuAc@6	glycopepnew_HCDEThcDiTCIDpeptide_EThcDpd2	19.2	1	4041	18	2.4e-08	1	53154.7	HUMAN	Angiotensinogen
[14]		P01019	14	1033.18	4	-0.42	HLVIHNESTCEQLAK	HexNAc4Hex5FucNeuAc2@6	glycopepnew_HCDEThcDiTCIDpeptide_EThcDpd2	19.183	1	4034	56.5	2.7e-12	1	53154.7	HUMAN	Angiotensinogen
[14]		P01019	14	923.896	4	-0.27	HLVIHNESTCEQLAK	HexNAc4Hex5NeuAc@6	glycopepnew_HCDEThcDiTCIDpeptide_EThcDpd2	17.033	1	3291	53.2	2.3e-17	1	53154.7	HUMAN	Angiotensinogen
[14]		P01019	14	996.671	4	0.99	HLVIHNESTCEQLAK	HexNAc4Hex5NeuAc2@6	glycopepnew_HCDEThcDiTCIDpeptide_EThcDpd2	19.233	1	4050	55	2.3e-17	1	53154.7	HUMAN	Angiotensinogen
[14]		P01019	14	1006.16	4	-1.3	HLVIHNESTCEQLAK	HexNAc4Hex5NeuAc2+Cation:K@6	glycopepnew_HCDEThcDiTCIDpeptide_EThcDpd2	19.167	2	4032	64.3	1.3e-17	1	53154.7	HUMAN	Angiotensinogen
[14]		P01019	14	1015.18	4	0.75	HLVIHNESTCEQLAK	HexNAc5Hex6NeuAc@6	glycopepnew_HCDEThcDiTCIDpeptide_EThcDpd2	16.567	2	3124	12.7	4.5e-05	1	53154.7	HUMAN	Angiotensinogen
[3]		P00738	120	1108.25	4	2.4	HNLTTGATLINEQWLLTTAK	HexNAc4Hex5NeuAc2@2	glycopepnew_HCDEThcDiTCIDpeptide_EThcDpd2	45.167	2	12749	46.3	3.7e-12	1	45205.7	HUMAN	Haptoglobin
[3]		P00738	120	1214.29	4	-4.9	HNLTTGATLINEQWLLTTAK	HexNAc6Hex6Fuc3@2=35	glycopepnew_HCDEThcDiTCIDpeptide_EThcDpd2	39.633	1	10860	21.4	2.8e-08	1	45205.7	HUMAN	Haptoglobin
[2]		P01876	150	1122.54	4	-3.9	HPRLSLHRPALEDLLLGSEANLTCTLTGLR	HexNAc3Hex3+Cation:K@21	glycopepnew_HCDEThcDiTCIDpeptide_EThcDpd2	44.6	2	12556	25.9	1.6e-09	2	37655	HUMAN	Immunoglobulin heavy constant alpha 1
[2]		P01876	150	1038.74	4	0.54	HRPALEDLLLGSEANLTCTLTGLR	HexNAc5Hex3@15	glycopepnew_HCDEThcDiTCIDpeptide_EThcDpd2	43.733	1	12260	43.3	2.3e-08	2	37655	HUMAN	Immunoglobulin heavy constant alpha 1
[2]		P01876	150	1152.03	4	1.2	HRPALEDLLLGSEANLTCTLTGLR	HexNAc5Hex4NeuAc@15	glycopepnew_HCDEThcDiTCIDpeptide_EThcDpd2	47.717	1	13584	24.4	6.7e-05	2	37655	HUMAN	Immunoglobulin heavy constant alpha 1
[8]		P01024	32	1353.37	5	-7.3	HYLMWGLSSDFWGEKPNLSYIIGKDTWVEHW	HexNAc6Hex8FucNeuAc@17;Oxidation@4|5|12	glycopepnew_HCDEThcDiTCIDpeptide_EThcDpd2	35.117	1	9328	13.2	5.7e-05	1	187150	HUMAN	Complement C3
[8]		P01024	32	1273.74	5	-4.2	HYLMWGLSSDFWGEKPNLSYIIGKDTWVEHW	Oxidation@4=8;HexNAc5Hex5FucNeuAc2@17	glycopepnew_HCDEThcDiTCIDpeptide_EThcDpd2	27.167	2	6700	16.8	3.3e-05	1	187150	HUMAN	Complement C3
[8]		P01024	32	1215.52	5	-4.3	HYLMWGLSSDFWGEKPNLSYIIGKDTWVEHWP	Oxidation@12=7;HexNAc5Hex7@17;Oxidation@27|31	glycopepnew_HCDEThcDiTCIDpeptide_EThcDpd2	25.233	2	6073	13.2	6.9e-05	1	187150	HUMAN	Complement C3
[2-1]	33	P01877	119	931.627	4	0.67	HYTNSSQDVTVPCR	HexNAc4Hex5FucNeuAc@4	glycopepnew_HCDEThcDiTCIDpeptide_EThcDpd2	17.317	1	3386	28	6.4e-11	1	36591.7	HUMAN	Immunoglobulin heavy constant alpha 2
[2-1]	33	P01877	119	941.114	4	-2	HYTNSSQDVTVPCR	HexNAc4Hex5FucNeuAc+Cation:K@4	glycopepnew_HCDEThcDiTCIDpeptide_EThcDpd2	17.267	3	3375	15.1	7e-06	1	36591.7	HUMAN	Immunoglobulin heavy constant alpha 2
[2-1]	33	P01877	119	1013.89	4	-0.12	HYTNSSQDVTVPCR	HexNAc4Hex5FucNeuAc2+Cation:K@4	glycopepnew_HCDEThcDiTCIDpeptide_EThcDpd2	20.117	1	4359	40.3	2.9e-17	1	36591.7	HUMAN	Immunoglobulin heavy constant alpha 2
[2-1]	33	P01877	119	982.397	4	0.88	HYTNSSQDVTVPCR	HexNAc5Hex5FucNeuAc@4	glycopepnew_HCDEThcDiTCIDpeptide_EThcDpd2	17.483	1	3441	35.8	1.7e-09	1	36591.7	HUMAN	Immunoglobulin heavy constant alpha 2
[2-1]	33	P01877	119	793.709	5	-1.5	HYTNSSQDVTVPCR	HexNAc5Hex5FucNeuAc+Cation:K@4	glycopepnew_HCDEThcDiTCIDpeptide_EThcDpd2	17.367	1	3405	42.7	5.4e-16	1	36591.7	HUMAN	Immunoglobulin heavy constant alpha 2
[2-1]	33	P01877	119	1055.17	4	1.3	HYTNSSQDVTVPCR	HexNAc5Hex5FucNeuAc2@4	glycopepnew_HCDEThcDiTCIDpeptide_EThcDpd2	20.183	1	4381	37.9	3.5e-13	1	36591.7	HUMAN	Immunoglobulin heavy constant alpha 2
[2-1]	33	P01877	119	1144.62	6	-1.9	HYTNSSQDVTVPCRVPPPPPCCHPR	HexNAc7Hex7FucNeuAc4+Cation:K@4	glycopepnew_HCDEThcDiTCIDpeptide_EThcDpd2	35.567	1	9479	13.9	5.3e-05	1	36591.7	HUMAN	Immunoglobulin heavy constant alpha 2
[2-1]	33	P01877	119	1144.27	5	-2.9	HYTNSSQDVTVPCRVPPPPPCCHPR	HexNAc8Hex7@4=16	glycopepnew_HCDEThcDiTCIDpeptide_EThcDpd2	25.417	2	6133	13.9	7.7e-05	1	36591.7	HUMAN	Immunoglobulin heavy constant alpha 2
[32]		P19827	4	1284.3	4	0.077	ICDLLVANNHFAHFFAPQNLTNMNK	HexNAc4Hex5NeuAc2@19	glycopepnew_HCDEThcDiTCIDpeptide_EThcDpd2	44.25	1	12438	33.4	1e-09	1	101390	HUMAN	Inter-alpha-trypsin inhibitor heavy chain H1
[3]		P00738	120	1101.51	4	0.16	IEKVVLHPNYSQVDIGLIK	HexNAc4Hex7NeuAc@9	glycopepnew_HCDEThcDiTCIDpeptide_EThcDpd2	39.133	1	10680	26.3	0.00016	1	45205.7	HUMAN	Haptoglobin
[29]		Q14624	6	1159.51	5	0.8	IFEPQGISFLETESTFMTNQLVDALTTWQNK	HexNAc4Hex5NeuAc2@30	glycopepnew_HCDEThcDiTCIDpeptide_EThcDpd2	77.383	3	23099	31.4	2.7e-08	1	103358	HUMAN	Inter-alpha-trypsin inhibitor heavy chain H4
[4]		P01023	96	1087.48	4	-3.8	IITILEEEMNVSVCGLYTYGK	HexNAc4Hex5Fuc2@10=12	glycopepnew_HCDEThcDiTCIDpeptide_EThcDpd2	53.467	1	15455	15.6	3.4e-06	1	163292	HUMAN	Alpha-2-macroglobulin
[4]		P01023	96	1169.74	4	-5.1	IITILEEEMNVSVCGLYTYGK	HexNAc4Hex5Fuc2NeuAc+Cation:K@10=34	glycopepnew_HCDEThcDiTCIDpeptide_EThcDpd2	71.567	1	21234	23.2	3.3e-08	1	163292	HUMAN	Alpha-2-macroglobulin
[4]		P01023	96	1169.49	4	-3.1	IITILEEEMNVSVCGLYTYGK	HexNAc4Hex5NeuAc2+Cation:K@10=6	glycopepnew_HCDEThcDiTCIDpeptide_EThcDpd2	71.367	2	21171	19.6	8e-06	1	163292	HUMAN	Alpha-2-macroglobulin
[36]		P01591	4	1001.96	4	-0.8	IIVPLNNRENISDPTSPLR	HexNAc3Hex5FucNeuAc@10	glycopepnew_HCDEThcDiTCIDpeptide_EThcDpd2	33.65	2	8834	28.1	2.5e-08	1	18098.8	HUMAN	Immunoglobulin J chain
[36]		P01591	4	1125.51	4	1.7	IIVPLNNRENISDPTSPLR	HexNAc4Hex5FucNeuAc2@10	glycopepnew_HCDEThcDiTCIDpeptide_EThcDpd2	37.6	1	10164	27.4	4.4e-09	1	18098.8	HUMAN	Immunoglobulin J chain
[5]		P02787	86	1205.31	5	-1.4	IMNGEADAMSLDGGFVYIAGKCGLVPVLAENYNK	HexNAc4Hex6Fuc2NeuAc+Cation:K@33=13	glycopepnew_HCDEThcDiTCIDpeptide_EThcDpd2	54.033	1	15631	32	3.4e-11	1	77064.7	HUMAN	Serotransferrin
[1]		P01009	159	1336.98	5	0.55	KADTHDEILEGLNFNLTEIPEAQIHEGFQELLR	HexNAc5Hex6NeuAc3@15||HexNAc6Hex9Fuc+Cation:K@15	glycopepnew_HCDEThcDiTCIDpeptide_EThcDpd2	57.567	1	16749	26.8	6.7e-08	1	46736.9	HUMAN	Alpha-1-antitrypsin
[1]		P01009	159	1374.2	5	1.4	KADTHDEILEGLNFNLTEIPEAQIHEGFQELLR	HexNAc7Hex8NeuAc+Cation:K@15	glycopepnew_HCDEThcDiTCIDpeptide_EThcDpd2	62.733	2	18419	21.1	3.3e-06	1	46736.9	HUMAN	Alpha-1-antitrypsin
[5]		P02787	86	953.161	4	0.74	KCGLVPVLAENYNK	HexNAc4Hex5NeuAc2@13	glycopepnew_HCDEThcDiTCIDpeptide_EThcDpd2	33.4	1	8744	31.6	1.1e-12	1	77064.7	HUMAN	Serotransferrin
[15]		P01008	14	1050.95	4	-3	KLGACNDTLQQLMEVFK	HexNAc4Hex5Fuc2NeuAc@6=22	glycopepnew_HCDEThcDiTCIDpeptide_EThcDpd2	50.433	2	14464	22.3	3.2e-07	1	52602.9	HUMAN	Antithrombin-III
[3]		P00738	120	1032.73	4	2.1	KVVLHPNYSQVDIGLIK	HexNAc4Hex5NeuAc2@7	glycopepnew_HCDEThcDiTCIDpeptide_EThcDpd2	33.667	1	8836	38.5	2e-09	1	45205.7	HUMAN	Haptoglobin
[3]		P00738	120	833.972	5	-0.45	KVVLHPNYSQVDIGLIK	HexNAc4Hex5NeuAc2+Cation:K@7	glycopepnew_HCDEThcDiTCIDpeptide_EThcDpd2	33.833	2	8897	19.3	2.5e-08	1	45205.7	HUMAN	Haptoglobin
[3]		P00738	120	1124.01	4	0.99	KVVLHPNYSQVDIGLIK	HexNAc5Hex6NeuAc2@7	glycopepnew_HCDEThcDiTCIDpeptide_EThcDpd2	33.517	1	8786	33.4	4e-11	1	45205.7	HUMAN	Haptoglobin
[3]		P00738	120	1160.26	4	-1.9	KVVLHPNYSQVDIGLIK	HexNAc6Hex9+Cation:K@7	glycopepnew_HCDEThcDiTCIDpeptide_EThcDpd2	39.617	2	10858	29.8	4e-06	1	45205.7	HUMAN	Haptoglobin
[2]		P01876	150	915.128	4	5.6	LAGKPTHVNVS	HexNAc4Hex5Fuc2NeuAc2+Cation:K@9	glycopepnew_HCDEThcDiTCIDpeptide_EThcDpd2	49	1	13993	14.2	7.8e-05	1	37655	HUMAN	Immunoglobulin heavy constant alpha 1
[2]		P01876	150	857.36	5	0.025	LAGKPTHVNVSVVMAEVDGT	HexNAc4Hex5NeuAc2+Cation:K@9;Oxidation@14	glycopepnew_HCDEThcDiTCIDpeptide_EThcDpd2	34.917	1	9261	20.8	9.9e-07	1	37655	HUMAN	Immunoglobulin heavy constant alpha 1
[2]		P01876	150	1143.97	4	-3.2	LAGKPTHVNVSVVMAEVDGTC	HexNAc2Hex12+Cation:K@9||HexNAc4Hex5FucNeuAc2+Cation:K@9	glycopepnew_HCDEThcDiTCIDpeptide_EThcDpd2	39.3	2	10745	17.8	5.9e-08	1	37655	HUMAN	Immunoglobulin heavy constant alpha 1
[2]		P01876	150	865.136	4	0.21	LAGKPTHVNVSVVMAEVDGTC	HexNAc3Hex4@9;Oxidation@14	glycopepnew_HCDEThcDiTCIDpeptide_EThcDpd2	20.533	1	4503	22.3	2e-08	1	37655	HUMAN	Immunoglobulin heavy constant alpha 1
[2]		P01876	150	857.159	5	-0.65	LAGKPTHVNVSVVMAEVDGTC	HexNAc4Hex4Fuc2NeuAc+Cation:K&Oxidation@(9&14)||HexNAc4Hex5FucNeuAc+Cation:K@9	glycopepnew_HCDEThcDiTCIDpeptide_EThcDpd2	34.733	1	9194	30.7	4.3e-10	1	37655	HUMAN	Immunoglobulin heavy constant alpha 1
[2]		P01876	150	1061.71	4	1.1	LAGKPTHVNVSVVMAEVDGTC	HexNAc4Hex5FucNeuAc@9=10	glycopepnew_HCDEThcDiTCIDpeptide_EThcDpd2	32.017	2	8293	28.3	3.4e-09	1	37655	HUMAN	Immunoglobulin heavy constant alpha 1
[2]		P01876	150	1134.48	4	0.8	LAGKPTHVNVSVVMAEVDGTC	HexNAc4Hex5FucNeuAc2@9	glycopepnew_HCDEThcDiTCIDpeptide_EThcDpd2	34.05	2	8972	26.2	8.2e-13	1	37655	HUMAN	Immunoglobulin heavy constant alpha 1
[2]		P01876	150	1138.48	4	-0.55	LAGKPTHVNVSVVMAEVDGTC	HexNAc4Hex5FucNeuAc2@9;Oxidation@14	glycopepnew_HCDEThcDiTCIDpeptide_EThcDpd2	30.967	1	7926	15.7	9.6e-06	1	37655	HUMAN	Immunoglobulin heavy constant alpha 1
[2]		P01876	150	1112.48	4	2.8	LAGKPTHVNVSVVMAEVDGTC	HexNAc5Hex4Fuc2NeuAc@9=10;Oxidation@14=10	glycopepnew_HCDEThcDiTCIDpeptide_EThcDpd2	36.65	2	9844	22	3.5e-07	1	37655	HUMAN	Immunoglobulin heavy constant alpha 1
[2]		P01876	150	897.775	5	-0.44	LAGKPTHVNVSVVMAEVDGTC	HexNAc5Hex4Fuc2NeuAc+Cation:K&Oxidation@(9&14)||HexNAc5Hex5FucNeuAc+Cation:K@9	glycopepnew_HCDEThcDiTCIDpeptide_EThcDpd2	34.783	1	9215	31.9	1.3e-09	1	37655	HUMAN	Immunoglobulin heavy constant alpha 1
[2]		P01876	150	1117.97	4	5.2	LAGKPTHVNVSVVMAEVDGTC	HexNAc5Hex4Fuc2NeuAc+Cation:K@9	glycopepnew_HCDEThcDiTCIDpeptide_EThcDpd2	34.767	1	9205	16.9	7.4e-08	1	37655	HUMAN	Immunoglobulin heavy constant alpha 1
[2]		P01876	150	1075.97	4	0.9	LAGKPTHVNVSVVMAEVDGTC	HexNAc5Hex4FucNeuAc&Oxidation@(9&14)||HexNAc5Hex5NeuAc@9	glycopepnew_HCDEThcDiTCIDpeptide_EThcDpd2	23.2	2	5400	17.2	1.1e-06	1	37655	HUMAN	Immunoglobulin heavy constant alpha 1
[2]		P01876	150	1185.25	4	0.5	LAGKPTHVNVSVVMAEVDGTC	HexNAc5Hex5FucNeuAc2@9	glycopepnew_HCDEThcDiTCIDpeptide_EThcDpd2	38.183	1	10357	11.2	6e-05	1	37655	HUMAN	Immunoglobulin heavy constant alpha 1
[2]		P01876	150	1194.74	4	-1.3	LAGKPTHVNVSVVMAEVDGTC	HexNAc5Hex5FucNeuAc2+Cation:K@9	glycopepnew_HCDEThcDiTCIDpeptide_EThcDpd2	39.167	1	10697	15.1	1.4e-07	1	37655	HUMAN	Immunoglobulin heavy constant alpha 1
[2]		P01876	150	1156.99	4	0.27	LAGKPTHVNVSVVMAEVDGTC	HexNAc5Hex6FucNeuAc@9;Oxidation@14	glycopepnew_HCDEThcDiTCIDpeptide_EThcDpd2	25.117	1	6034	10	9.8e-05	1	37655	HUMAN	Immunoglobulin heavy constant alpha 1
[2]		P01876	150	967.399	5	-0.32	LAGKPTHVNVSVVMAEVDGTC	HexNAc6Hex5NeuAc2+Cation:K@9	glycopepnew_HCDEThcDiTCIDpeptide_EThcDpd2	25.983	1	6317	22.9	4e-09	1	37655	HUMAN	Immunoglobulin heavy constant alpha 1
[2]		P01876	150	901.136	4	0.019	LAGKPTHVNVSVVMAEVDGTCY	HexNAc2Hex4Fuc+Cation:K&Oxidation@(9&14)||HexNAc2Hex5+Cation:K@9	glycopepnew_HCDEThcDiTCIDpeptide_EThcDpd2	33.167	1	8667	22.9	7.9e-09	1	37655	HUMAN	Immunoglobulin heavy constant alpha 1
[2]		P01876	150	905.904	4	1.6	LAGKPTHVNVSVVMAEVDGTCY	HexNAc3Hex4@9;Oxidation@14	glycopepnew_HCDEThcDiTCIDpeptide_EThcDpd2	23.583	1	5525	21.1	1.8e-06	1	37655	HUMAN	Immunoglobulin heavy constant alpha 1
[2]		P01876	150	916.156	4	-2.5	LAGKPTHVNVSVVMAEVDGTCY	HexNAc4Hex3@9;Oxidation@14	glycopepnew_HCDEThcDiTCIDpeptide_EThcDpd2	41.967	1	11655	13.9	0.00014	1	37655	HUMAN	Immunoglobulin heavy constant alpha 1
[2]		P01876	150	1102.47	4	0.24	LAGKPTHVNVSVVMAEVDGTCY	HexNAc4Hex4Fuc2NeuAc&Oxidation@(9&14)||HexNAc4Hex5FucNeuAc@9	glycopepnew_HCDEThcDiTCIDpeptide_EThcDpd2	36.65	1	9842	28	8.1e-09	1	37655	HUMAN	Immunoglobulin heavy constant alpha 1
[2]		P01876	150	1065.96	4	0.091	LAGKPTHVNVSVVMAEVDGTCY	HexNAc4Hex4FucNeuAc&Oxidation@(9&14)||HexNAc4Hex5NeuAc@9	glycopepnew_HCDEThcDiTCIDpeptide_EThcDpd2	36.7	1	9861	18.1	1.6e-06	1	37655	HUMAN	Immunoglobulin heavy constant alpha 1
[2]		P01876	150	1175.25	4	1.3	LAGKPTHVNVSVVMAEVDGTCY	HexNAc4Hex5FucNeuAc2@9	glycopepnew_HCDEThcDiTCIDpeptide_EThcDpd2	42.167	2	11736	15.7	1.5e-07	1	37655	HUMAN	Immunoglobulin heavy constant alpha 1
[2]		P01876	150	1080.47	4	1.5	LAGKPTHVNVSVVMAEVDGTCY	HexNAc5Hex4Fuc2&Oxidation@(9&14)||HexNAc5Hex5Fuc@9	glycopepnew_HCDEThcDiTCIDpeptide_EThcDpd2	32.933	1	8595	21.1	1.2e-07	1	37655	HUMAN	Immunoglobulin heavy constant alpha 1
[2]		P01876	150	1153.24	4	-0.68	LAGKPTHVNVSVVMAEVDGTCY	HexNAc5Hex4Fuc2NeuAc&Oxidation@(9&14)||HexNAc5Hex5FucNeuAc@9	glycopepnew_HCDEThcDiTCIDpeptide_EThcDpd2	36.85	1	9912	16	2.5e-05	1	37655	HUMAN	Immunoglobulin heavy constant alpha 1
[2]		P01876	150	1122.47	4	-5.2	LAGKPTHVNVSVVMAEVDGTCY	HexNAc5Hex4Fuc3+Cation:K@9=7	glycopepnew_HCDEThcDiTCIDpeptide_EThcDpd2	36.733	1	9871	16	1.3e-05	1	37655	HUMAN	Immunoglobulin heavy constant alpha 1
[2]		P01876	150	1226.02	4	0.018	LAGKPTHVNVSVVMAEVDGTCY	HexNAc5Hex5FucNeuAc2@9	glycopepnew_HCDEThcDiTCIDpeptide_EThcDpd2	41.1	1	11360	13.6	2.1e-05	1	37655	HUMAN	Immunoglobulin heavy constant alpha 1
[2]		P01876	150	988.606	5	-1.4	LAGKPTHVNVSVVMAEVDGTCY	HexNAc5Hex5FucNeuAc2+Cation:K@9	glycopepnew_HCDEThcDiTCIDpeptide_EThcDpd2	41.283	1	11428	19.9	2.3e-09	1	37655	HUMAN	Immunoglobulin heavy constant alpha 1
[2]		P01876	150	1021.7	4	-0.12	LEDLLLGSEANLTCTLTGLR	HexNAc3Hex5FucNeuAc+Cation:K@11	glycopepnew_HCDEThcDiTCIDpeptide_EThcDpd2	52.317	1	15078	27.9	1.2e-06	2	37655	HUMAN	Immunoglobulin heavy constant alpha 1
[25]		Q96PD5	5	1010.83	5	-1.7	LEPVHLQLQCMSQEQLAQVAANATK	HexNAc4Hex5NeuAc2+Cation:K@22=19	glycopepnew_HCDEThcDiTCIDpeptide_EThcDpd2	43.333	1	12140	29.4	2.2e-11	1	62217.6	HUMAN	N-acetylmuramoyl-L-alanine amidase
[5]		P02787	86	1050.42	4	1.6	LFGSNVTDCSGNFCLFR	HexNAc4Hex5NeuAc2@5	glycopepnew_HCDEThcDiTCIDpeptide_EThcDpd2	51.633	1	14860	41.2	5.3e-11	1	77064.7	HUMAN	Serotransferrin
[5]		P02787	86	1059.91	4	-0.8	LFGSNVTDCSGNFCLFR	HexNAc4Hex5NeuAc2+Cation:K@5	glycopepnew_HCDEThcDiTCIDpeptide_EThcDpd2	51.717	2	14889	40.7	2.7e-15	1	77064.7	HUMAN	Serotransferrin
[15]		P01008	14	1018.68	4	0.97	LGACNDTLQQLMEVFK	HexNAc4Hex5NeuAc2@5	glycopepnew_HCDEThcDiTCIDpeptide_EThcDpd2	60.083	1	17559	43.3	6.4e-15	1	52602.9	HUMAN	Antithrombin-III
[15]		P01008	14	1028.16	4	-1.1	LGACNDTLQQLMEVFK	HexNAc4Hex5NeuAc2+Cation:K@5=62	glycopepnew_HCDEThcDiTCIDpeptide_EThcDpd2	59.983	1	17522	65.1	2.5e-15	1	52602.9	HUMAN	Antithrombin-III
[15]		P01008	14	1032.93	4	-1.1	LGACNDTLQQLMEVFK	HexNAc5Hex4NeuAc2@5=29;Oxidation@12=29	glycopepnew_HCDEThcDiTCIDpeptide_EThcDpd2	39.467	1	10808	29	5.4e-08	1	52602.9	HUMAN	Antithrombin-III
[15]		P01008	14	1182.74	4	3	LGACNDTLQQLMEVFK	HexNAc5Hex6NeuAc3@5	glycopepnew_HCDEThcDiTCIDpeptide_EThcDpd2	70.733	2	20964	25.3	4.7e-10	1	52602.9	HUMAN	Antithrombin-III
[15]		P01008	14	1192.22	4	0.95	LGACNDTLQQLMEVFK	HexNAc5Hex6NeuAc3+Cation:K@5	glycopepnew_HCDEThcDiTCIDpeptide_EThcDpd2	70.75	1	20966	36.6	5.9e-13	1	52602.9	HUMAN	Antithrombin-III
[1]		P01009	159	1014.66	4	-4.1	LGNATAIFFLPDEGK	HexNAc5Hex6FucNeuAc+Cation:K@3	glycopepnew_HCDEThcDiTCIDpeptide_EThcDpd2	58.967	1	17202	24.5	9.6e-11	1	46736.9	HUMAN	Alpha-1-antitrypsin
[1]		P01009	159	1329.57	3	-4.6	LGNATAIFFLPDEGK	HexNAc7Hex6@3	glycopepnew_HCDEThcDiTCIDpeptide_EThcDpd2	72.9	2	21661	11.6	1.2e-05	1	46736.9	HUMAN	Alpha-1-antitrypsin
[1]		P01009	159	1006.92	4	-5	LGNATAIFFLPDEGK	HexNAc7Hex6+Cation:K@3	glycopepnew_HCDEThcDiTCIDpeptide_EThcDpd2	72.017	2	21370	34.9	2.6e-12	1	46736.9	HUMAN	Alpha-1-antitrypsin
[28]		P51884	5	913.67	4	1.7	LHINHNNLTESVGPLPK	HexNAc4Hex5Fuc@7	glycopepnew_HCDEThcDiTCIDpeptide_EThcDpd2	21.4	1	4814	56.7	1.7e-15	1	38429.3	HUMAN	Lumican
[28]		P51884	5	986.445	4	2.4	LHINHNNLTESVGPLPK	HexNAc4Hex5FucNeuAc@7	glycopepnew_HCDEThcDiTCIDpeptide_EThcDpd2	24.033	1	5680	40.4	7.4e-13	1	38429.3	HUMAN	Lumican
[28]		P51884	5	1054.72	4	-0.58	LHINHNNLTESVGPLPKS	HexNAc5Hex4NeuAc2@7=19	glycopepnew_HCDEThcDiTCIDpeptide_EThcDpd2	24.517	1	5842	21.7	1.8e-07	1	38429.3	HUMAN	Lumican
[3]		P00738	120	910.913	4	4	LHPNYSQVDIGLIK	HexNAc4Hex4Fuc2NeuAc@4	glycopepnew_HCDEThcDiTCIDpeptide_EThcDpd2	39.583	1	10844	19.4	3e-06	1	45205.7	HUMAN	Haptoglobin
[3]		P00738	120	1170.25	4	5.6	LHPNYSQVDIGLIK	HexNAc6Hex7FucNeuAc2@4	glycopepnew_HCDEThcDiTCIDpeptide_EThcDpd2	44.967	1	12676	33.2	2e-07	1	45205.7	HUMAN	Haptoglobin
[48]		P03952	1	1113.75	4	2.1	LQAPLNYTEFQKPICLPSK	HexNAc4Hex5NeuAc2@6	glycopepnew_HCDEThcDiTCIDpeptide_EThcDpd2	42.267	2	11769	34	9.5e-10	1	71370.4	HUMAN	Plasma kallikrein
[11]		P01011	24	1026.08	5	2	LSISTALAFLSLGAHNTTLTEILK	HexNAc6Hex5Fuc2NeuAc@16	glycopepnew_HCDEThcDiTCIDpeptide_EThcDpd2	63.717	1	18717	14	0.00011	1	47651.3	HUMAN	Alpha-1-antichymotrypsin
[2]		P01876	150	792.425	4	0.38	LSLHRPALEDLLLGSEANLTCTLTGLR	HexNAc@18	glycopepnew_HCDEThcDiTCIDpeptide_EThcDpd2	45.767	1	12946	49.8	2.8e-11	2	37655	HUMAN	Immunoglobulin heavy constant alpha 1
[2]		P01876	150	1045.76	4	0.82	LSLHRPALEDLLLGSEANLTCTLTGLR	HexNAc2Hex5@18	glycopepnew_HCDEThcDiTCIDpeptide_EThcDpd2	44.55	1	12538	73.1	6.7e-13	2	37655	HUMAN	Immunoglobulin heavy constant alpha 1
[2]		P01876	150	1086.27	4	-0.24	LSLHRPALEDLLLGSEANLTCTLTGLR	HexNAc2Hex6@18	glycopepnew_HCDEThcDiTCIDpeptide_EThcDpd2	44.583	1	12552	42.1	5.9e-12	2	37655	HUMAN	Immunoglobulin heavy constant alpha 1
[2]		P01876	150	1106.79	4	1	LSLHRPALEDLLLGSEANLTCTLTGLR	HexNAc4Hex4@18	glycopepnew_HCDEThcDiTCIDpeptide_EThcDpd2	44.567	2	12542	55.2	8.2e-12	2	37655	HUMAN	Immunoglobulin heavy constant alpha 1
[2]		P01876	150	980.65	5	-3.1	LSLHRPALEDLLLGSEANLTCTLTGLR	HexNAc4Hex4FucNeuAc+Cation:K@18	glycopepnew_HCDEThcDiTCIDpeptide_EThcDpd2	48.15	1	13717	71	3.9e-21	2	37655	HUMAN	Immunoglobulin heavy constant alpha 1
[2]		P01876	150	1179.56	4	1.9	LSLHRPALEDLLLGSEANLTCTLTGLR	HexNAc4Hex4NeuAc@18	glycopepnew_HCDEThcDiTCIDpeptide_EThcDpd2	48.333	1	13774	40.1	7e-09	2	37655	HUMAN	Immunoglobulin heavy constant alpha 1
[2]		P01876	150	1220.08	4	1.4	LSLHRPALEDLLLGSEANLTCTLTGLR	HexNAc4Hex5NeuAc@18	glycopepnew_HCDEThcDiTCIDpeptide_EThcDpd2	48.367	1	13784	30.7	2.4e-07	2	37655	HUMAN	Immunoglobulin heavy constant alpha 1
[2]		P01876	150	1229.56	4	-2.5	LSLHRPALEDLLLGSEANLTCTLTGLR	HexNAc4Hex5NeuAc+Cation:K@18	glycopepnew_HCDEThcDiTCIDpeptide_EThcDpd2	48.183	1	13727	44.9	1e-11	2	37655	HUMAN	Immunoglobulin heavy constant alpha 1
[2]		P01876	150	1034.48	5	2.5	LSLHRPALEDLLLGSEANLTCTLTGLR	HexNAc4Hex5NeuAc2@18	glycopepnew_HCDEThcDiTCIDpeptide_EThcDpd2	52.467	1	15127	68.8	3.2e-17	2	37655	HUMAN	Immunoglobulin heavy constant alpha 1
[2]		P01876	150	1117.05	4	1.1	LSLHRPALEDLLLGSEANLTCTLTGLR	HexNAc5Hex3@18	glycopepnew_HCDEThcDiTCIDpeptide_EThcDpd2	44.6	1	12554	58.4	8.7e-11	2	37655	HUMAN	Immunoglobulin heavy constant alpha 1
[2]		P01876	150	901.428	5	0.014	LSLHRPALEDLLLGSEANLTCTLTGLR	HexNAc5Hex3+Cation:K@18	glycopepnew_HCDEThcDiTCIDpeptide_EThcDpd2	44.817	1	12626	12.8	0.00018	2	37655	HUMAN	Immunoglobulin heavy constant alpha 1
[2]		P01876	150	1153.56	4	4.4	LSLHRPALEDLLLGSEANLTCTLTGLR	HexNAc5Hex3Fuc@18	glycopepnew_HCDEThcDiTCIDpeptide_EThcDpd2	44.617	1	12562	32.3	2.4e-06	2	37655	HUMAN	Immunoglobulin heavy constant alpha 1
[2]		P01876	150	1157.56	4	-0.046	LSLHRPALEDLLLGSEANLTCTLTGLR	HexNAc5Hex4@18	glycopepnew_HCDEThcDiTCIDpeptide_EThcDpd2	44.5	3	12520	38.2	3e-08	2	37655	HUMAN	Immunoglobulin heavy constant alpha 1
[2]		P01876	150	933.837	5	-1.4	LSLHRPALEDLLLGSEANLTCTLTGLR	HexNAc5Hex4+Cation:K@18	glycopepnew_HCDEThcDiTCIDpeptide_EThcDpd2	44.533	2	12530	49.2	3.8e-14	2	37655	HUMAN	Immunoglobulin heavy constant alpha 1
[2]		P01876	150	854.058	6	-3.4	LSLHRPALEDLLLGSEANLTCTLTGLR	HexNAc5Hex5Fuc2+Cation:K@18=14	glycopepnew_HCDEThcDiTCIDpeptide_EThcDpd2	48.233	1	13744	29.8	2.3e-10	2	37655	HUMAN	Immunoglobulin heavy constant alpha 1
[2]		P01876	150	1016.88	5	2.7	LSLHRPALEDLLLGSEANLTCTLTGLR	HexNAc5Hex5NeuAc@18	glycopepnew_HCDEThcDiTCIDpeptide_EThcDpd2	48.05	1	13689	60.4	2.6e-15	2	37655	HUMAN	Immunoglobulin heavy constant alpha 1
[2]		P01876	150	1088.08	5	-7.5	LSLHRPALEDLLLGSEANLTCTLTGLRD	HexNAc6Hex5NeuAc+Cation:K@18	glycopepnew_HCDEThcDiTCIDpeptide_EThcDpd2	52.383	1	15100	19	6.3e-08	2	37655	HUMAN	Immunoglobulin heavy constant alpha 1
[6]		P02763	91	1006.45	4	6.8	LVPVPITNATLDQITGK	HexNAc4Hex5NeuAc2+Cation:K@8	glycopepnew_HCDEThcDiTCIDpeptide_EThcDpd2	49.95	1	14300	28.6	3.6e-10	1	23511.8	HUMAN	Alpha-1-acid glycoprotein 1
[6]		P02763	91	1134.24	4	-1.9	LVPVPITNATLDQITGK	HexNAc5Hex6FucNeuAc2+Cation:K@8	glycopepnew_HCDEThcDiTCIDpeptide_EThcDpd2	48.817	1	13943	13.1	3.7e-06	1	23511.8	HUMAN	Alpha-1-acid glycoprotein 1
[6]		P02763	91	965.812	5	-0.59	LVPVPITNATLDQITGK	HexNAc5Hex6FucNeuAc3+Cation:K@8	glycopepnew_HCDEThcDiTCIDpeptide_EThcDpd2	57.45	2	16722	28.4	1e-10	1	23511.8	HUMAN	Alpha-1-acid glycoprotein 1
[6]		P02763	91	1015.46	4	1.7	LVPVPITNATLDQITGK	HexNAc5Hex6NeuAc@8	glycopepnew_HCDEThcDiTCIDpeptide_EThcDpd2	42.95	1	11997	40	7.4e-10	1	23511.8	HUMAN	Alpha-1-acid glycoprotein 1
[6]		P02763	91	1088.24	4	1.1	LVPVPITNATLDQITGK	HexNAc5Hex6NeuAc2@8	glycopepnew_HCDEThcDiTCIDpeptide_EThcDpd2	49.517	1	14169	28.5	6.3e-10	1	23511.8	HUMAN	Alpha-1-acid glycoprotein 1
[6]		P02763	91	1097.73	4	-0.33	LVPVPITNATLDQITGK	HexNAc5Hex6NeuAc2+Cation:K@8	glycopepnew_HCDEThcDiTCIDpeptide_EThcDpd2	49.017	2	14002	50.2	5.3e-16	1	23511.8	HUMAN	Alpha-1-acid glycoprotein 1
[6]		P02763	91	1161.01	4	2.8	LVPVPITNATLDQITGK	HexNAc5Hex6NeuAc3@8	glycopepnew_HCDEThcDiTCIDpeptide_EThcDpd2	58.017	2	16895	28.7	3e-08	1	23511.8	HUMAN	Alpha-1-acid glycoprotein 1
[6]		P02763	91	1170.5	4	0.06	LVPVPITNATLDQITGK	HexNAc5Hex6NeuAc3+Cation:K@8	glycopepnew_HCDEThcDiTCIDpeptide_EThcDpd2	57.75	3	16810	42.9	9e-15	1	23511.8	HUMAN	Alpha-1-acid glycoprotein 1
[6]		P02763	91	1252.29	4	-0.73	LVPVPITNATLDQITGK	HexNAc6Hex7NeuAc3@8	glycopepnew_HCDEThcDiTCIDpeptide_EThcDpd2	56.767	1	16500	19.5	4.9e-06	1	23511.8	HUMAN	Alpha-1-acid glycoprotein 1
[6-1]	30	P19652	74	904.154	4	1.8	LVPVPITNATLDR	HexNAc4Hex5NeuAc2@8	glycopepnew_HCDEThcDiTCIDpeptide_EThcDpd2	42.5	1	11851	41.8	3.6e-09	1	23602.8	HUMAN	Alpha-1-acid glycoprotein 2
[6-1]	30	P19652	74	913.64	4	-2	LVPVPITNATLDR	HexNAc4Hex5NeuAc2+Cation:K@8	glycopepnew_HCDEThcDiTCIDpeptide_EThcDpd2	42.633	1	11886	40	6.4e-13	1	23602.8	HUMAN	Alpha-1-acid glycoprotein 2
[6-1]	30	P19652	74	859.374	4	-3.3	LVPVPITNATLDR	HexNAc5Hex6+Cation:K@8	glycopepnew_HCDEThcDiTCIDpeptide_EThcDpd2	30.667	2	7823	32.8	3e-09	1	23602.8	HUMAN	Alpha-1-acid glycoprotein 2
[6-1]	30	P19652	74	995.434	4	-1.1	LVPVPITNATLDR	HexNAc5Hex6NeuAc2@8	glycopepnew_HCDEThcDiTCIDpeptide_EThcDpd2	41.9	1	11636	35	5.5e-10	1	23602.8	HUMAN	Alpha-1-acid glycoprotein 2
[6-1]	30	P19652	74	1004.92	4	-4.2	LVPVPITNATLDR	HexNAc5Hex6NeuAc2+Cation:K@8	glycopepnew_HCDEThcDiTCIDpeptide_EThcDpd2	41.833	2	11611	55.6	7.4e-12	1	23602.8	HUMAN	Alpha-1-acid glycoprotein 2
[6-1]	30	P19652	74	1068.21	4	1.2	LVPVPITNATLDR	HexNAc5Hex6NeuAc3@8	glycopepnew_HCDEThcDiTCIDpeptide_EThcDpd2	50.017	1	14321	34.9	1.9e-09	1	23602.8	HUMAN	Alpha-1-acid glycoprotein 2
[6-1]	30	P19652	74	1077.7	4	-0.94	LVPVPITNATLDR	HexNAc5Hex6NeuAc3+Cation:K@8	glycopepnew_HCDEThcDiTCIDpeptide_EThcDpd2	50.733	2	14557	43	5.2e-09	1	23602.8	HUMAN	Alpha-1-acid glycoprotein 2
[6-1]	30	P19652	74	1169.23	4	-4.8	LVPVPITNATLDR	HexNAc6Hex7Fuc2NeuAc2+Cation:K@8=10	glycopepnew_HCDEThcDiTCIDpeptide_EThcDpd2	49.083	2	14020	17.6	8.5e-06	1	23602.8	HUMAN	Alpha-1-acid glycoprotein 2
[6-1]	30	P19652	74	1168.98	4	-2.4	LVPVPITNATLDR	HexNAc6Hex7NeuAc3+Cation:K@8	glycopepnew_HCDEThcDiTCIDpeptide_EThcDpd2	49.967	1	14304	16.6	0.00016	1	23602.8	HUMAN	Alpha-1-acid glycoprotein 2
[6-1]	30	P19652	74	1114.71	4	-1.6	LVPVPITNATLDR	HexNAc7Hex8NeuAc+Cation:K@8	glycopepnew_HCDEThcDiTCIDpeptide_EThcDpd2	50.35	2	14436	23.5	6.4e-09	1	23602.8	HUMAN	Alpha-1-acid glycoprotein 2
[25]		Q96PD5	5	1394.14	4	1.3	LYHFLLGAWSLNATELDPCPLSPELLGLTK	HexNAc4Hex5NeuAc2@12	glycopepnew_HCDEThcDiTCIDpeptide_EThcDpd2	62.167	2	18243	34.6	2.1e-11	1	62217.6	HUMAN	N-acetylmuramoyl-L-alanine amidase
[12]		P08185	24	918.367	4	1.9	MDPNAAYVNMSNHHR	HexNAc4Hex4FucNeuAc&Oxidation@(9&10)||HexNAc4Hex5NeuAc@9	glycopepnew_HCDEThcDiTCIDpeptide_EThcDpd2	19.317	1	4078	28.7	2.1e-11	1	45141.3	HUMAN	Corticosteroid-binding globulin
[12]		P08185	24	1027.9	4	-1.9	MDPNAAYVNMSNHHR	HexNAc4Hex5Fuc3NeuAc@9||HexNAc9Hex3+Cation:K@9	glycopepnew_HCDEThcDiTCIDpeptide_EThcDpd2	23.817	2	5616	33.9	1.9e-09	1	45141.3	HUMAN	Corticosteroid-binding globulin
[12]		P08185	24	991.141	4	1.9	MDPNAAYVNMSNHHR	HexNAc4Hex5NeuAc2@9	glycopepnew_HCDEThcDiTCIDpeptide_EThcDpd2	22.517	2	5178	44.9	4.4e-09	1	45141.3	HUMAN	Corticosteroid-binding globulin
[12]		P08185	24	800.703	5	-1.3	MDPNAAYVNMSNHHR	HexNAc4Hex5NeuAc2+Cation:K@9=28	glycopepnew_HCDEThcDiTCIDpeptide_EThcDpd2	22.5	1	5171	59.4	1.1e-18	1	45141.3	HUMAN	Corticosteroid-binding globulin
[12]		P08185	24	1155.2	4	1.5	MDPNAAYVNMSNHHR	HexNAc5Hex6NeuAc3@9	glycopepnew_HCDEThcDiTCIDpeptide_EThcDpd2	26.4	1	6453	18.9	2e-06	1	45141.3	HUMAN	Corticosteroid-binding globulin
[12]		P08185	24	1287.97	5	-4.4	MLQSSTISYLHDSELPCQLVQMNYVGNGTVFFILPDK	HexNAc6Hex5Fuc&Oxidation@(27&22)||HexNAc6Hex6@27	glycopepnew_HCDEThcDiTCIDpeptide_EThcDpd2	58.633	1	17092	24.6	8.4e-08	1	45141.3	HUMAN	Corticosteroid-binding globulin
[22]		O75882	8	1287.03	4	0.9	MPSQAPTGNFYPQPLLNSSMCLEDSR	HexNAc4Hex5NeuAc2@17	glycopepnew_HCDEThcDiTCIDpeptide_EThcDpd2	49.217	2	14068	21.2	2.9e-06	1	158538	HUMAN	Attractin
[4]		P01023	96	1286.58	4	-5.9	MVLFAPNIYVLDYLNETQQLTPEIK	HexNAc6Hex6@15	glycopepnew_HCDEThcDiTCIDpeptide_EThcDpd2	67.5	2	19925	13	8.4e-05	1	163292	HUMAN	Alpha-2-macroglobulin
[3]		P00738	120	993.828	5	-0.6	MVSHHNLTTGATLINEQWLLT	Oxidation@1;HexNAc5Hex5FucNeuAc2@6=20;Oxidation@18=20	glycopepnew_HCDEThcDiTCIDpeptide_EThcDpd2	39.2	1	10707	16	0.00011	1	45205.7	HUMAN	Haptoglobin
[3]		P00738	120	721.374	4	1.3	MVSHHNLTTGATLINEQWLLTTAK	HexNAc@6	glycopepnew_HCDEThcDiTCIDpeptide_EThcDpd2	33.733	1	8863	79.7	3.9e-15	1	45205.7	HUMAN	Haptoglobin
[3]		P00738	120	1057.74	4	2	MVSHHNLTTGATLINEQWLLTTAK	HexNAc3Hex4NeuAc@6	glycopepnew_HCDEThcDiTCIDpeptide_EThcDpd2	36.217	1	9694	21.6	8.9e-06	1	45205.7	HUMAN	Haptoglobin
[3]		P00738	120	1076.25	4	0.88	MVSHHNLTTGATLINEQWLLTTAK	HexNAc4Hex5@6=21	glycopepnew_HCDEThcDiTCIDpeptide_EThcDpd2	32.617	2	8482	77	1.4e-21	1	45205.7	HUMAN	Haptoglobin
[3]		P00738	120	1149.27	4	-3	MVSHHNLTTGATLINEQWLLTTAK	HexNAc4Hex5Fuc2@6=44	glycopepnew_HCDEThcDiTCIDpeptide_EThcDpd2	30.75	2	7850	17.3	4.2e-09	1	45205.7	HUMAN	Haptoglobin
[3]		P00738	120	1222.04	4	-6.3	MVSHHNLTTGATLINEQWLLTTAK	HexNAc4Hex5Fuc2NeuAc@6=8	glycopepnew_HCDEThcDiTCIDpeptide_EThcDpd2	84.567	2	25194	18.4	1.4e-07	1	45205.7	HUMAN	Haptoglobin
[3]		P00738	120	985.431	5	-3	MVSHHNLTTGATLINEQWLLTTAK	HexNAc4Hex5Fuc2NeuAc+Cation:K@6=11	glycopepnew_HCDEThcDiTCIDpeptide_EThcDpd2	51.883	1	14929	15.6	3.3e-05	1	45205.7	HUMAN	Haptoglobin
[3]		P00738	120	1222.3	4	-7.9	MVSHHNLTTGATLINEQWLLTTAK	HexNAc4Hex5Fuc4@6=7	glycopepnew_HCDEThcDiTCIDpeptide_EThcDpd2	45.5	1	12853	33.3	2.8e-10	1	45205.7	HUMAN	Haptoglobin
[3]		P00738	120	1185.53	4	-2.8	MVSHHNLTTGATLINEQWLLTTAK	HexNAc4Hex5FucNeuAc@6=43	glycopepnew_HCDEThcDiTCIDpeptide_EThcDpd2	35.867	1	9577	49.5	3.5e-16	1	45205.7	HUMAN	Haptoglobin
[3]		P00738	120	1149.02	4	-0.29	MVSHHNLTTGATLINEQWLLTTAK	HexNAc4Hex5NeuAc@6=20	glycopepnew_HCDEThcDiTCIDpeptide_EThcDpd2	36.95	1	9946	72.5	3.6e-19	1	45205.7	HUMAN	Haptoglobin
[3]		P00738	120	1153.02	4	2.5	MVSHHNLTTGATLINEQWLLTTAK	HexNAc4Hex5NeuAc@6=28;Oxidation@18=100	glycopepnew_HCDEThcDiTCIDpeptide_EThcDpd2	33.217	1	8686	53.6	3.9e-16	1	45205.7	HUMAN	Haptoglobin
[3]		P00738	120	1158.51	4	-3	MVSHHNLTTGATLINEQWLLTTAK	HexNAc4Hex5NeuAc+Cation:K@6=41	glycopepnew_HCDEThcDiTCIDpeptide_EThcDpd2	35.8	1	9559	74	1.1e-26	1	45205.7	HUMAN	Haptoglobin
[3]		P00738	120	1221.8	4	0.2	MVSHHNLTTGATLINEQWLLTTAK	HexNAc4Hex5NeuAc2@6	glycopepnew_HCDEThcDiTCIDpeptide_EThcDpd2	71.7	1	21267	67.2	9.9e-25	1	45205.7	HUMAN	Haptoglobin
[3]		P00738	120	1225.79	4	-0.37	MVSHHNLTTGATLINEQWLLTTAK	HexNAc4Hex5NeuAc2@6;Oxidation@18	glycopepnew_HCDEThcDiTCIDpeptide_EThcDpd2	37.417	1	10101	47.5	8e-15	1	45205.7	HUMAN	Haptoglobin
[3]		P00738	120	1231.28	4	-2.9	MVSHHNLTTGATLINEQWLLTTAK	HexNAc4Hex5NeuAc2+Cation:K@6=31	glycopepnew_HCDEThcDiTCIDpeptide_EThcDpd2	39.767	2	10909	62.2	2.1e-20	1	45205.7	HUMAN	Haptoglobin
[3]		P00738	120	932.012	5	-5.6	MVSHHNLTTGATLINEQWLLTTAK	HexNAc5Hex3FucNeuAc+Cation:K@6	glycopepnew_HCDEThcDiTCIDpeptide_EThcDpd2	41.467	1	11492	11.8	6.6e-05	1	45205.7	HUMAN	Haptoglobin
[3]		P00738	120	1236.55	4	-6.6	MVSHHNLTTGATLINEQWLLTTAK	HexNAc5Hex5Fuc3@6=14	glycopepnew_HCDEThcDiTCIDpeptide_EThcDpd2	40.083	3	11013	25.1	1.9e-07	1	45205.7	HUMAN	Haptoglobin
[3]		P00738	120	1309.08	4	-2.4	MVSHHNLTTGATLINEQWLLTTAK	HexNAc5Hex5FucNeuAc2@6=8	glycopepnew_HCDEThcDiTCIDpeptide_EThcDpd2	35.817	3	9565	13.3	3.2e-05	1	45205.7	HUMAN	Haptoglobin
[3]		P00738	120	982.438	5	4.4	MVSHHNLTTGATLINEQWLLTTAK	HexNAc6Hex6+Cation:K@6=29	glycopepnew_HCDEThcDiTCIDpeptide_EThcDpd2	39.783	1	10918	24.4	9e-09	1	45205.7	HUMAN	Haptoglobin
[3]		P00738	120	1386.6	4	-5.6	MVSHHNLTTGATLINEQWLLTTAK	HexNAc7Hex8Fuc@6	glycopepnew_HCDEThcDiTCIDpeptide_EThcDpd2	51.833	2	14918	22.8	3.1e-09	1	45205.7	HUMAN	Haptoglobin
[3]		P00738	120	1396.09	4	-5.7	MVSHHNLTTGATLINEQWLLTTAK	HexNAc7Hex8Fuc+Cation:K@6	glycopepnew_HCDEThcDiTCIDpeptide_EThcDpd2	44.15	2	12410	25.6	1.4e-09	1	45205.7	HUMAN	Haptoglobin
[3]		P00738	120	1225.8	4	-0.27	MVSHHNLTTGATLINEQWLLTTAK	Oxidation@1;HexNAc4Hex5NeuAc2@6	glycopepnew_HCDEThcDiTCIDpeptide_EThcDpd2	40.3	2	11087	50.7	1.6e-14	1	45205.7	HUMAN	Haptoglobin
[3]		P00738	120	1229.79	4	-2.2	MVSHHNLTTGATLINEQWLLTTAK	Oxidation@1;HexNAc4Hex5NeuAc2@6;Oxidation@18	glycopepnew_HCDEThcDiTCIDpeptide_EThcDpd2	36.533	1	9805	17.8	2.5e-05	1	45205.7	HUMAN	Haptoglobin
[3]		P00738	120	1163.28	4	1.6	MVSHHNLTTGATLINEQWLLTTAK	Oxidation@1;HexNAc5Hex4NeuAc@6	glycopepnew_HCDEThcDiTCIDpeptide_EThcDpd2	35.667	2	9515	36.5	3e-12	1	45205.7	HUMAN	Haptoglobin
[3]		P00738	120	1317.08	4	0.89	MVSHHNLTTGATLINEQWLLTTAK	Oxidation@1;HexNAc5Hex6NeuAc2@6	glycopepnew_HCDEThcDiTCIDpeptide_EThcDpd2	38.783	1	10574	41.6	1.2e-14	1	45205.7	HUMAN	Haptoglobin
[3]		P00738	120	930.21	5	0.19	MVSHHNLTTGATLINEQWLLTTAK	Oxidation@1=150;HexNAc4Hex5NeuAc+Cation:K@6=86	glycopepnew_HCDEThcDiTCIDpeptide_EThcDpd2	35.35	1	9399	63.8	8.8e-23	1	45205.7	HUMAN	Haptoglobin
[3]		P00738	120	1157.02	4	1.4	MVSHHNLTTGATLINEQWLLTTAK	Oxidation@1=16;HexNAc4Hex5NeuAc@6=16;Oxidation@18=16	glycopepnew_HCDEThcDiTCIDpeptide_EThcDpd2	33.167	3	8671	25.5	8.1e-08	1	45205.7	HUMAN	Haptoglobin
[3]		P00738	120	1313.08	4	1.7	MVSHHNLTTGATLINEQWLLTTAK	Oxidation@1=34;HexNAc5Hex5FucNeuAc2@6=34	glycopepnew_HCDEThcDiTCIDpeptide_EThcDpd2	35.167	2	9347	27.2	1.5e-09	1	45205.7	HUMAN	Haptoglobin
[3]		P00738	120	824.025	6	-4.2	MVSHHNLTTGATLINEQWLLTTAK	Oxidation@1=48;HexNAc4Hex5Fuc2NeuAc+Cation:K@6=15	glycopepnew_HCDEThcDiTCIDpeptide_EThcDpd2	39.05	1	10657	23.4	2.1e-07	1	45205.7	HUMAN	Haptoglobin
[19]		P02765	10	1016.65	4	0.41	NAQNNGSNFQLEEISR	HexNAc4Hex5NeuAc2+Cation:K@5	glycopepnew_HCDEThcDiTCIDpeptide_EThcDpd2	35.633	1	9503	41	1.9e-13	1	39325	HUMAN	Alpha-2-HS-glycoprotein
[6]		P02763	91	888.319	4	-3.1	NEEYNK	HexNAc5Hex6FucNeuAc2+Cation:K@5	glycopepnew_HCDEThcDiTCIDpeptide_EThcDpd2	15.6	1	2774	16.2	3.3e-06	2	23511.8	HUMAN	Alpha-1-acid glycoprotein 1
[6]		P02763	91	924.581	4	-0.65	NEEYNK	HexNAc5Hex6NeuAc3+Cation:K@5	glycopepnew_HCDEThcDiTCIDpeptide_EThcDpd2	19.367	1	4093	19.1	1.4e-06	2	23511.8	HUMAN	Alpha-1-acid glycoprotein 1
[15]		P01008	14	1111.95	4	5.3	NETYQDISELVYGAK	HexNAc6Hex9+Cation:K@1	glycopepnew_HCDEThcDiTCIDpeptide_EThcDpd2	60.3	1	17630	46.3	1.4e-13	1	52602.9	HUMAN	Antithrombin-III
[18]		P00734	12	793.82	4	-0.84	NFTENDLLVR	HexNAc4Hex5NeuAc+Cation:K@1	glycopepnew_HCDEThcDiTCIDpeptide_EThcDpd2	33.567	1	8806	34.3	2.4e-09	1	70037.5	HUMAN	Prothrombin
[18]		P00734	12	866.593	4	-1.5	NFTENDLLVR	HexNAc4Hex5NeuAc2+Cation:K@1	glycopepnew_HCDEThcDiTCIDpeptide_EThcDpd2	40.417	2	11129	40.3	1.3e-11	1	70037.5	HUMAN	Prothrombin
[22]		O75882	8	935.626	4	0.98	NHSCSEGQISIFR	HexNAc4Hex5NeuAc2@1	glycopepnew_HCDEThcDiTCIDpeptide_EThcDpd2	29.683	2	7508	41.8	1.6e-11	1	158538	HUMAN	Attractin
[43]		P04004	1	1003.82	5	-0.47	NISDGFDGIPDNVDAALALPAHSYSGR	HexNAc4Hex5NeuAc2+Cation:K@1	glycopepnew_HCDEThcDiTCIDpeptide_EThcDpd2	49.25	1	14080	62	1.5e-21	1	54306.1	HUMAN	Vitronectin
[3]		P00738	120	916.634	4	1.7	NLFLNHSENATAK	HexNAc4Hex5NeuAc2@5=63	glycopepnew_HCDEThcDiTCIDpeptide_EThcDpd2	24.833	1	5950	43.3	2.4e-14	1	45205.7	HUMAN	Haptoglobin
[3]		P00738	120	1120.63	5	-4.9	NLFLNHSENATAK	HexNAc8Hex9FucNeuAc3+Cation:K@5|9	glycopepnew_HCDEThcDiTCIDpeptide_EThcDpd2	22.65	1	5224	12.6	0.00015	1	45205.7	HUMAN	Haptoglobin
[1]		P01009	159	1326.95	5	-0.47	NLTEIPEAQIHEGFQELLR	HexNAc8Hex9FucNeuAc4@1	glycopepnew_HCDEThcDiTCIDpeptide_EThcDpd2	62.283	1	18277	29.8	2.9e-06	1	46736.9	HUMAN	Alpha-1-antitrypsin
[11]		P01011	24	1152	4	1.1	NLTETSEAEIHQSFQHLLR	HexNAc4Hex5Fuc3NeuAc@1||HexNAc9Hex3+Cation:K@1	glycopepnew_HCDEThcDiTCIDpeptide_EThcDpd2	43.217	1	12097	15.2	5e-06	1	47651.3	HUMAN	Alpha-1-antichymotrypsin
[3]		P00738	120	1232.29	4	-0.096	NLTTGATLINEQWLLTTAK	HexNAc9Hex6+Cation:K@1	glycopepnew_HCDEThcDiTCIDpeptide_EThcDpd2	40.717	2	11237	23.9	1.2e-07	1	45205.7	HUMAN	Haptoglobin
[26]		P05155	7	1009.9	4	-7.5	NPNATSSSSQDPESLQDRGEGK	HexNAc3Hex4FucNeuAc+Cation:K@3	glycopepnew_HCDEThcDiTCIDpeptide_EThcDpd2	55.25	1	16024	10.5	0.00014	1	55154.7	HUMAN	Plasma protease C1 inhibitor
[6]		P02763	91	1364.27	4	-1.7	NTTYLNVQR	HexNAc11Hex11NeuAc+Cation:K@1	glycopepnew_HCDEThcDiTCIDpeptide_EThcDpd2	46.05	2	13048	13	0.00012	1	23511.8	HUMAN	Alpha-1-acid glycoprotein 1
[11]		P01011	24	1083.91	5	-0.81	NVIFSPLSISTALAFLSLGAHNTTLTEILK	HexNAc4Hex5Fuc2NeuAc+Cation:K@22=10	glycopepnew_HCDEThcDiTCIDpeptide_EThcDpd2	69.85	1	20666	25.4	4e-09	1	47651.3	HUMAN	Alpha-1-antichymotrypsin
[2]		P01876	150	894.172	4	1.7	PALEDLLLGSEANLTCTLTGLR	HexNAc2Hex5@13	glycopepnew_HCDEThcDiTCIDpeptide_EThcDpd2	52.467	2	15133	39	5.5e-09	2	37655	HUMAN	Immunoglobulin heavy constant alpha 1
[2]		P01876	150	903.66	4	0.88	PALEDLLLGSEANLTCTLTGLR	HexNAc2Hex5+Cation:K@13	glycopepnew_HCDEThcDiTCIDpeptide_EThcDpd2	52.483	1	15135	36.7	1.9e-09	2	37655	HUMAN	Immunoglobulin heavy constant alpha 1
[2]		P01876	150	1205.57	3	3.6	PALEDLLLGSEANLTCTLTGLR	HexNAc3Hex4@13	glycopepnew_HCDEThcDiTCIDpeptide_EThcDpd2	57.967	1	16876	40.2	5.2e-11	2	37655	HUMAN	Immunoglobulin heavy constant alpha 1
[2]		P01876	150	977.202	4	0.42	PALEDLLLGSEANLTCTLTGLR	HexNAc3Hex4NeuAc@13	glycopepnew_HCDEThcDiTCIDpeptide_EThcDpd2	58.5	1	17050	48.8	8.7e-11	2	37655	HUMAN	Immunoglobulin heavy constant alpha 1
[2]		P01876	150	986.688	4	-2.4	PALEDLLLGSEANLTCTLTGLR	HexNAc3Hex4NeuAc+Cation:K@13	glycopepnew_HCDEThcDiTCIDpeptide_EThcDpd2	58.533	1	17058	48.9	3.3e-12	2	37655	HUMAN	Immunoglobulin heavy constant alpha 1
[2]		P01876	150	1017.72	4	2.4	PALEDLLLGSEANLTCTLTGLR	HexNAc3Hex5NeuAc@13	glycopepnew_HCDEThcDiTCIDpeptide_EThcDpd2	58.333	1	17000	45.2	2.9e-09	2	37655	HUMAN	Immunoglobulin heavy constant alpha 1
[2]		P01876	150	1273.26	3	-3.1	PALEDLLLGSEANLTCTLTGLR	HexNAc4Hex4@13	glycopepnew_HCDEThcDiTCIDpeptide_EThcDpd2	52.35	2	15092	24.6	1e-06	2	37655	HUMAN	Immunoglobulin heavy constant alpha 1
[2]		P01876	150	1073.98	4	6.6	PALEDLLLGSEANLTCTLTGLR	HexNAc4Hex4FucNeuAc+Cation:K@13	glycopepnew_HCDEThcDiTCIDpeptide_EThcDpd2	58.45	1	17035	37.4	3.7e-11	2	37655	HUMAN	Immunoglobulin heavy constant alpha 1
[2]		P01876	150	1146.75	4	4.3	PALEDLLLGSEANLTCTLTGLR	HexNAc4Hex4FucNeuAc2+Cation:K@13	glycopepnew_HCDEThcDiTCIDpeptide_EThcDpd2	65.5	1	19284	54.3	4.1e-18	2	37655	HUMAN	Immunoglobulin heavy constant alpha 1
[2]		P01876	150	1027.97	4	2.8	PALEDLLLGSEANLTCTLTGLR	HexNAc4Hex4NeuAc@13	glycopepnew_HCDEThcDiTCIDpeptide_EThcDpd2	58.217	1	16961	52	4.9e-13	2	37655	HUMAN	Immunoglobulin heavy constant alpha 1
[2]		P01876	150	1037.46	4	-0.98	PALEDLLLGSEANLTCTLTGLR	HexNAc4Hex4NeuAc+Cation:K@13	glycopepnew_HCDEThcDiTCIDpeptide_EThcDpd2	58.417	2	17028	38.9	2.6e-12	2	37655	HUMAN	Immunoglobulin heavy constant alpha 1
[2]		P01876	150	1327.28	3	0.36	PALEDLLLGSEANLTCTLTGLR	HexNAc4Hex5@13	glycopepnew_HCDEThcDiTCIDpeptide_EThcDpd2	58.067	1	16909	26.1	3.1e-10	2	37655	HUMAN	Immunoglobulin heavy constant alpha 1
[2]		P01876	150	1005.2	4	-1.3	PALEDLLLGSEANLTCTLTGLR	HexNAc4Hex5+Cation:K@13	glycopepnew_HCDEThcDiTCIDpeptide_EThcDpd2	58.4	1	17024	26.5	2.4e-08	2	37655	HUMAN	Immunoglobulin heavy constant alpha 1
[2]		P01876	150	1141.78	4	6.3	PALEDLLLGSEANLTCTLTGLR	HexNAc4Hex5Fuc4@13	glycopepnew_HCDEThcDiTCIDpeptide_EThcDpd2	47.4	3	13479	24.9	5.3e-05	2	37655	HUMAN	Immunoglobulin heavy constant alpha 1
[2]		P01876	150	1177.77	4	1.8	PALEDLLLGSEANLTCTLTGLR	HexNAc4Hex5FucNeuAc2@13	glycopepnew_HCDEThcDiTCIDpeptide_EThcDpd2	65.433	1	19259	28.7	1.1e-06	2	37655	HUMAN	Immunoglobulin heavy constant alpha 1
[2]		P01876	150	1068.49	4	1.4	PALEDLLLGSEANLTCTLTGLR	HexNAc4Hex5NeuAc@13	glycopepnew_HCDEThcDiTCIDpeptide_EThcDpd2	58.65	1	17098	46	6.3e-10	2	37655	HUMAN	Immunoglobulin heavy constant alpha 1
[2]		P01876	150	1077.97	4	-2.1	PALEDLLLGSEANLTCTLTGLR	HexNAc4Hex5NeuAc+Cation:K@13	glycopepnew_HCDEThcDiTCIDpeptide_EThcDpd2	58.9	2	17180	44.8	5.4e-14	2	37655	HUMAN	Immunoglobulin heavy constant alpha 1
[2]		P01876	150	1141.26	4	-0.35	PALEDLLLGSEANLTCTLTGLR	HexNAc4Hex5NeuAc2@13	glycopepnew_HCDEThcDiTCIDpeptide_EThcDpd2	67.45	1	19903	40	1.1e-10	2	37655	HUMAN	Immunoglobulin heavy constant alpha 1
[2]		P01876	150	1150.75	4	-1.7	PALEDLLLGSEANLTCTLTGLR	HexNAc4Hex5NeuAc2+Cation:K@13	glycopepnew_HCDEThcDiTCIDpeptide_EThcDpd2	65.5	2	19286	59.2	6.4e-13	2	37655	HUMAN	Immunoglobulin heavy constant alpha 1
[2]		P01876	150	965.456	4	2.5	PALEDLLLGSEANLTCTLTGLR	HexNAc5Hex3@13	glycopepnew_HCDEThcDiTCIDpeptide_EThcDpd2	52.483	2	15140	45.2	2.8e-10	2	37655	HUMAN	Immunoglobulin heavy constant alpha 1
[2]		P01876	150	1084.24	4	6.6	PALEDLLLGSEANLTCTLTGLR	HexNAc5Hex3FucNeuAc+Cation:K@13	glycopepnew_HCDEThcDiTCIDpeptide_EThcDpd2	58.183	1	16948	54	9.7e-16	2	37655	HUMAN	Immunoglobulin heavy constant alpha 1
[2]		P01876	150	1005.97	4	0.88	PALEDLLLGSEANLTCTLTGLR	HexNAc5Hex4@13	glycopepnew_HCDEThcDiTCIDpeptide_EThcDpd2	52.183	1	15031	45.9	1.1e-09	2	37655	HUMAN	Immunoglobulin heavy constant alpha 1
[2]		P01876	150	1015.46	4	-1	PALEDLLLGSEANLTCTLTGLR	HexNAc5Hex4+Cation:K@13	glycopepnew_HCDEThcDiTCIDpeptide_EThcDpd2	52.25	2	15059	43.7	7e-12	2	37655	HUMAN	Immunoglobulin heavy constant alpha 1
[2]		P01876	150	1051.98	4	6.1	PALEDLLLGSEANLTCTLTGLR	HexNAc5Hex4Fuc+Cation:K@13	glycopepnew_HCDEThcDiTCIDpeptide_EThcDpd2	52.15	2	15023	37.3	3.5e-11	2	37655	HUMAN	Immunoglobulin heavy constant alpha 1
[2]		P01876	150	1078.74	4	1.8	PALEDLLLGSEANLTCTLTGLR	HexNAc5Hex4NeuAc@13	glycopepnew_HCDEThcDiTCIDpeptide_EThcDpd2	58.45	2	17037	34.9	1.6e-07	2	37655	HUMAN	Immunoglobulin heavy constant alpha 1
[2]		P01876	150	1046.48	4	0.93	PALEDLLLGSEANLTCTLTGLR	HexNAc5Hex5@13	glycopepnew_HCDEThcDiTCIDpeptide_EThcDpd2	51.967	2	14961	48	4.1e-12	2	37655	HUMAN	Immunoglobulin heavy constant alpha 1
[2]		P01876	150	1119.26	4	1.2	PALEDLLLGSEANLTCTLTGLR	HexNAc5Hex5NeuAc@13	glycopepnew_HCDEThcDiTCIDpeptide_EThcDpd2	58.017	1	16893	42.2	7.7e-10	2	37655	HUMAN	Immunoglobulin heavy constant alpha 1
[2]		P01876	150	1128.74	4	-1.5	PALEDLLLGSEANLTCTLTGLR	HexNAc5Hex5NeuAc+Cation:K@13	glycopepnew_HCDEThcDiTCIDpeptide_EThcDpd2	57.883	1	16850	35	2e-11	2	37655	HUMAN	Immunoglobulin heavy constant alpha 1
[2]		P01876	150	1192.03	4	-0.7	PALEDLLLGSEANLTCTLTGLR	HexNAc5Hex5NeuAc2@13	glycopepnew_HCDEThcDiTCIDpeptide_EThcDpd2	65.6	1	19316	21.6	6.3e-08	2	37655	HUMAN	Immunoglobulin heavy constant alpha 1
[3]		P00738	120	1107.71	4	1.9	PNYSQVDIGLIK	HexNAc6Hex7FucNeuAc2@2	glycopepnew_HCDEThcDiTCIDpeptide_EThcDpd2	39.283	2	10738	22	6.7e-06	1	45205.7	HUMAN	Haptoglobin
[3]		P00738	120	944.592	5	1.9	PNYSQVDIGLIK	HexNAc6Hex7FucNeuAc3@2	glycopepnew_HCDEThcDiTCIDpeptide_EThcDpd2	44.817	2	12628	32.8	1.2e-07	1	45205.7	HUMAN	Haptoglobin
[10-1]	19	P01859	24	952.406	3	-1.9	PREEQFNSTFR	HexNAc4Hex3Fuc@7	glycopepnew_HCDEThcDiTCIDpeptide_EThcDpd2	17.067	1	3300	13.7	3.2e-05	1	35901	HUMAN	Immunoglobulin heavy constant gamma 2
[6]		P02763	91	1209	4	2.8	PVPITNATLDQITGK	HexNAc6Hex7Fuc2NeuAc2+Cation:K@6=7	glycopepnew_HCDEThcDiTCIDpeptide_EThcDpd2	48.7	2	13900	17.4	1.7e-05	1	23511.8	HUMAN	Alpha-1-acid glycoprotein 1
[6]		P02763	91	1218.73	4	3.9	QDQCIYNTTYLNVQR	Gln->pyro-Glu@1;HexNAc6Hex7NeuAc2+Cation:K@7	glycopepnew_HCDEThcDiTCIDpeptide_EThcDpd2	32.85	1	8559	13	7.8e-05	1	23511.8	HUMAN	Alpha-1-acid glycoprotein 1
[6]		P02763	91	1282.01	4	5.4	QDQCIYNTTYLNVQR	Gln->pyro-Glu@1;HexNAc6Hex7NeuAc3@7	glycopepnew_HCDEThcDiTCIDpeptide_EThcDpd2	38.317	2	10409	13.3	9.4e-05	1	23511.8	HUMAN	Alpha-1-acid glycoprotein 1
[6]		P02763	91	1291.5	4	1.3	QDQCIYNTTYLNVQR	Gln->pyro-Glu@1;HexNAc6Hex7NeuAc3+Cation:K@7	glycopepnew_HCDEThcDiTCIDpeptide_EThcDpd2	38.483	2	10470	11	9.4e-05	1	23511.8	HUMAN	Alpha-1-acid glycoprotein 1
[6]		P02763	91	1354.78	4	2.9	QDQCIYNTTYLNVQR	Gln->pyro-Glu@1;HexNAc6Hex7NeuAc4@7	glycopepnew_HCDEThcDiTCIDpeptide_EThcDpd2	46.4	1	13152	11.1	7e-05	1	23511.8	HUMAN	Alpha-1-acid glycoprotein 1
[6]		P02763	91	1058.92	4	-0.47	QDQCIYNTTYLNVQR	HexNAc5Hex6NeuAc+Cation:K@7=72	glycopepnew_HCDEThcDiTCIDpeptide_EThcDpd2	32.9	1	8581	49.8	2e-15	1	23511.8	HUMAN	Alpha-1-acid glycoprotein 1
[6]		P02763	91	1122.21	4	2	QDQCIYNTTYLNVQR	HexNAc5Hex6NeuAc2@7=34	glycopepnew_HCDEThcDiTCIDpeptide_EThcDpd2	38.417	2	10448	23	3.2e-08	1	23511.8	HUMAN	Alpha-1-acid glycoprotein 1
[6]		P02763	91	1194.98	4	2.2	QDQCIYNTTYLNVQR	HexNAc5Hex6NeuAc3@7=38	glycopepnew_HCDEThcDiTCIDpeptide_EThcDpd2	46.383	1	13144	25.3	5.1e-08	1	23511.8	HUMAN	Alpha-1-acid glycoprotein 1
[6]		P02763	91	1204.47	4	-1.7	QDQCIYNTTYLNVQR	HexNAc5Hex6NeuAc3+Cation:K@7=37	glycopepnew_HCDEThcDiTCIDpeptide_EThcDpd2	45.817	1	12958	25.3	2e-07	1	23511.8	HUMAN	Alpha-1-acid glycoprotein 1
[6]		P02763	91	1282.26	4	-1.5	QDQCIYNTTYLNVQR	HexNAc6Hex6FucNeuAc3@7=49	glycopepnew_HCDEThcDiTCIDpeptide_EThcDpd2	38.267	1	10387	30.6	4.4e-09	1	23511.8	HUMAN	Alpha-1-acid glycoprotein 1
[6]		P02763	91	1286.26	4	0.38	QDQCIYNTTYLNVQR	HexNAc6Hex7NeuAc3@7	glycopepnew_HCDEThcDiTCIDpeptide_EThcDpd2	45.917	2	12994	26.1	9.1e-10	1	23511.8	HUMAN	Alpha-1-acid glycoprotein 1
[6]		P02763	91	1359.04	4	0.95	QDQCIYNTTYLNVQR	HexNAc6Hex7NeuAc4@7	glycopepnew_HCDEThcDiTCIDpeptide_EThcDpd2	59.183	1	17271	26.1	1.1e-11	1	23511.8	HUMAN	Alpha-1-acid glycoprotein 1
[6]		P02763	91	1296.5	4	-7.5	QDQCIYNTTYLNVQR	HexNAc8Hex9Fuc+Cation:K@7	glycopepnew_HCDEThcDiTCIDpeptide_EThcDpd2	45.883	1	12983	39.1	2.6e-09	1	23511.8	HUMAN	Alpha-1-acid glycoprotein 1
[5]		P02787	86	948.774	5	-5.7	QHLFGSNVTDCSGNFCLFR	Gln->pyro-Glu@1;HexNAc9Hex3Fuc+Cation:K@7	glycopepnew_HCDEThcDiTCIDpeptide_EThcDpd2	37.75	1	10218	26.6	1.1e-09	1	77064.7	HUMAN	Serotransferrin
[1]		P01009	159	1235	4	-2.7	QLAHQSNSTNIFFSPV	HexNAc6Hex11Fuc@7	glycopepnew_HCDEThcDiTCIDpeptide_EThcDpd2	74.617	2	22214	11.8	6.6e-05	1	46736.9	HUMAN	Alpha-1-antitrypsin
[1]		P01009	159	1188.74	4	-0.84	QLAHQSNSTNIFFSPVSIATAF	Gln->pyro-Glu@1;HexNAc2Hex12+Cation:K@7||HexNAc4Hex5FucNeuAc2+Cation:K@7	glycopepnew_HCDEThcDiTCIDpeptide_EThcDpd2	78.15	1	23334	15.3	6.9e-05	1	46736.9	HUMAN	Alpha-1-antitrypsin
[1]		P01009	159	1148.24	4	5.5	QLAHQSNSTNIFFSPVSIATAF	Gln->pyro-Glu@1;HexNAc4Hex4FucNeuAc2+Cation:K@7	glycopepnew_HCDEThcDiTCIDpeptide_EThcDpd2	78.35	1	23397	16.9	1.6e-05	1	46736.9	HUMAN	Alpha-1-antitrypsin
[1]		P01009	159	1152.23	4	-0.91	QLAHQSNSTNIFFSPVSIATAF	Gln->pyro-Glu@1;HexNAc4Hex5NeuAc2+Cation:K@7	glycopepnew_HCDEThcDiTCIDpeptide_EThcDpd2	78.467	1	23438	19	2e-06	1	46736.9	HUMAN	Alpha-1-antitrypsin
[1]		P01009	159	1179.26	4	0.88	QLAHQSNSTNIFFSPVSIATAF	Gln->pyro-Glu@1=62;HexNAc4Hex5FucNeuAc2@7=62	glycopepnew_HCDEThcDiTCIDpeptide_EThcDpd2	78.05	2	23308	31.9	1.4e-12	1	46736.9	HUMAN	Alpha-1-antitrypsin
[1]		P01009	159	1142.74	4	1.6	QLAHQSNSTNIFFSPVSIATAF	Gln->pyro-Glu@1=66;HexNAc4Hex5NeuAc2@7=66	glycopepnew_HCDEThcDiTCIDpeptide_EThcDpd2	78.433	1	23424	34.3	1.5e-12	1	46736.9	HUMAN	Alpha-1-antitrypsin
[1]		P01009	159	1193	4	-0.97	QLAHQSNSTNIFFSPVSIATAF	HexNAc2Hex12+Cation:K@7||HexNAc4Hex5FucNeuAc2+Cation:K@7	glycopepnew_HCDEThcDiTCIDpeptide_EThcDpd2	60.817	2	17797	19	5.1e-07	1	46736.9	HUMAN	Alpha-1-antitrypsin
[1]		P01009	159	1152.49	4	4.8	QLAHQSNSTNIFFSPVSIATAF	HexNAc4Hex4FucNeuAc2+Cation:K@7	glycopepnew_HCDEThcDiTCIDpeptide_EThcDpd2	61.017	2	17857	16	6.5e-06	1	46736.9	HUMAN	Alpha-1-antitrypsin
[1]		P01009	159	1183.51	4	0.73	QLAHQSNSTNIFFSPVSIATAF	HexNAc4Hex5FucNeuAc2@7=45	glycopepnew_HCDEThcDiTCIDpeptide_EThcDpd2	60.817	1	17795	31	1.3e-11	1	46736.9	HUMAN	Alpha-1-antitrypsin
[1]		P01009	159	1156.48	4	-1.2	QLAHQSNSTNIFFSPVSIATAF	HexNAc4Hex5NeuAc2+Cation:K@7=48	glycopepnew_HCDEThcDiTCIDpeptide_EThcDpd2	60.95	2	17837	25	9.2e-10	1	46736.9	HUMAN	Alpha-1-antitrypsin
[1]		P01009	159	1134.73	4	-5	QLAHQSNSTNIFFSPVSIATAF	HexNAc5Hex5Fuc2+Cation:K@7=13	glycopepnew_HCDEThcDiTCIDpeptide_EThcDpd2	64.983	1	19118	10	0.00015	1	46736.9	HUMAN	Alpha-1-antitrypsin
[1]		P01009	159	1193.26	4	1	QLAHQSNSTNIFFSPVSIATAFAM	Gln->pyro-Glu@1=51;HexNAc4Hex5NeuAc2@7=51	glycopepnew_HCDEThcDiTCIDpeptide_EThcDpd2	84.333	2	25124	27.1	4.9e-10	1	46736.9	HUMAN	Alpha-1-antitrypsin
[1]		P01009	159	1207	4	-2.5	QLAHQSNSTNIFFSPVSIATAFAM	HexNAc4Hex5NeuAc2+Cation:K@7=20	glycopepnew_HCDEThcDiTCIDpeptide_EThcDpd2	67.017	2	19766	19	1.2e-05	1	46736.9	HUMAN	Alpha-1-antitrypsin
[1]		P01009	159	1366.33	4	2.2	QLAHQSNSTNIFFSPVSIATAFAM	HexNAc7Hex8Fuc@7;Oxidation@24	glycopepnew_HCDEThcDiTCIDpeptide_EThcDpd2	68.433	2	20213	14.7	7.2e-05	1	46736.9	HUMAN	Alpha-1-antitrypsin
[1]		P01009	159	1094.28	5	1.3	QLAHQSNSTNIFFSPVSIATAFAMLS	HexNAc7Hex6NeuAc@7	glycopepnew_HCDEThcDiTCIDpeptide_EThcDpd2	65.8	1	19381	18.7	3.8e-05	1	46736.9	HUMAN	Alpha-1-antitrypsin
[1]		P01009	159	1348.6	4	3.8	QLAHQSNSTNIFFSPVSIATAFAMLSLGTK	Gln->pyro-Glu@1;HexNAc4Hex4FucNeuAc2+Cation:K@7	glycopepnew_HCDEThcDiTCIDpeptide_EThcDpd2	80.35	1	24011	47.4	7.7e-13	1	46736.9	HUMAN	Alpha-1-antitrypsin
[1]		P01009	159	1270.33	4	2.2	QLAHQSNSTNIFFSPVSIATAFAMLSLGTK	Gln->pyro-Glu@1;HexNAc4Hex5NeuAc@7=54	glycopepnew_HCDEThcDiTCIDpeptide_EThcDpd2	70.767	1	20973	38.2	1.3e-10	1	46736.9	HUMAN	Alpha-1-antitrypsin
[1]		P01009	159	1279.81	4	-0.77	QLAHQSNSTNIFFSPVSIATAFAMLSLGTK	Gln->pyro-Glu@1;HexNAc4Hex5NeuAc+Cation:K@7=129	glycopepnew_HCDEThcDiTCIDpeptide_EThcDpd2	70.833	1	20990	61.4	1.3e-19	1	46736.9	HUMAN	Alpha-1-antitrypsin
[1]		P01009	159	1082.27	5	-1.1	QLAHQSNSTNIFFSPVSIATAFAMLSLGTK	Gln->pyro-Glu@1;HexNAc4Hex5NeuAc2+Cation:K@7=109	glycopepnew_HCDEThcDiTCIDpeptide_EThcDpd2	80.417	1	24029	71.4	9.6e-23	1	46736.9	HUMAN	Alpha-1-antitrypsin
[1]		P01009	159	1347.35	4	-2.1	QLAHQSNSTNIFFSPVSIATAFAMLSLGTK	Gln->pyro-Glu@1=25;HexNAc4Hex5Fuc2NeuAc&Oxidation@(7&24)||HexNAc4Hex6FucNeuAc@7	glycopepnew_HCDEThcDiTCIDpeptide_EThcDpd2	77.2	1	23034	15.9	5.4e-06	1	46736.9	HUMAN	Alpha-1-antitrypsin
[1]		P01009	159	1347.61	4	-3.1	QLAHQSNSTNIFFSPVSIATAFAMLSLGTK	Gln->pyro-Glu@1=25;HexNAc4Hex5Fuc4&Oxidation@(7&24)||HexNAc4Hex6Fuc3@7	glycopepnew_HCDEThcDiTCIDpeptide_EThcDpd2	77.35	1	23084	11.5	7.7e-05	1	46736.9	HUMAN	Alpha-1-antitrypsin
[1]		P01009	159	1383.86	4	-0.68	QLAHQSNSTNIFFSPVSIATAFAMLSLGTK	Gln->pyro-Glu@1=25;Oxidation@24=36;HexNAc4Hex5Fuc3NeuAc@7||HexNAc9Hex3+Cation:K@7	glycopepnew_HCDEThcDiTCIDpeptide_EThcDpd2	76.017	2	22663	24.2	1.2e-08	1	46736.9	HUMAN	Alpha-1-antitrypsin
[1]		P01009	159	1343.1	4	-2.3	QLAHQSNSTNIFFSPVSIATAFAMLSLGTK	Gln->pyro-Glu@1=30;HexNAc4Hex5NeuAc2@7=30	glycopepnew_HCDEThcDiTCIDpeptide_EThcDpd2	81.05	1	24226	30.8	4.5e-10	1	46736.9	HUMAN	Alpha-1-antitrypsin
[1]		P01009	159	1394.38	4	1.4	QLAHQSNSTNIFFSPVSIATAFAMLSLGTK	Gln->pyro-Glu@1=30;HexNAc7Hex6@7=30;Oxidation@24=30	glycopepnew_HCDEThcDiTCIDpeptide_EThcDpd2	64.617	1	19007	21.7	3.5e-06	1	46736.9	HUMAN	Alpha-1-antitrypsin
[1]		P01009	159	1379.62	4	1.9	QLAHQSNSTNIFFSPVSIATAFAMLSLGTK	Gln->pyro-Glu@1=41;HexNAc4Hex5FucNeuAc2@7=41	glycopepnew_HCDEThcDiTCIDpeptide_EThcDpd2	80.883	1	24176	30.7	5.4e-11	1	46736.9	HUMAN	Alpha-1-antitrypsin
[1]		P01009	159	1114.89	5	-0.72	QLAHQSNSTNIFFSPVSIATAFAMLSLGTK	HexNAc2Hex12+Cation:K@7||HexNAc4Hex5FucNeuAc2+Cation:K@7	glycopepnew_HCDEThcDiTCIDpeptide_EThcDpd2	68.2	1	20136	79.4	3.9e-26	1	46736.9	HUMAN	Alpha-1-antitrypsin
[1]		P01009	159	1352.86	4	5.8	QLAHQSNSTNIFFSPVSIATAFAMLSLGTK	HexNAc4Hex4FucNeuAc2+Cation:K@7=43	glycopepnew_HCDEThcDiTCIDpeptide_EThcDpd2	68.583	1	20258	38	2.7e-13	1	46736.9	HUMAN	Alpha-1-antitrypsin
[1]		P01009	159	1383.87	4	1.1	QLAHQSNSTNIFFSPVSIATAFAMLSLGTK	HexNAc4Hex5FucNeuAc2@7=50	glycopepnew_HCDEThcDiTCIDpeptide_EThcDpd2	68.783	2	20325	40.1	1.4e-13	1	46736.9	HUMAN	Alpha-1-antitrypsin
[1]		P01009	159	1274.59	4	1.2	QLAHQSNSTNIFFSPVSIATAFAMLSLGTK	HexNAc4Hex5NeuAc@7=45	glycopepnew_HCDEThcDiTCIDpeptide_EThcDpd2	61.817	2	18123	60.5	7.1e-18	1	46736.9	HUMAN	Alpha-1-antitrypsin
[1]		P01009	159	1027.46	5	-0.77	QLAHQSNSTNIFFSPVSIATAFAMLSLGTK	HexNAc4Hex5NeuAc+Cation:K@7=72	glycopepnew_HCDEThcDiTCIDpeptide_EThcDpd2	61.6	2	18059	72.8	3.2e-22	1	46736.9	HUMAN	Alpha-1-antitrypsin
[1]		P01009	159	1347.36	4	-0.39	QLAHQSNSTNIFFSPVSIATAFAMLSLGTK	HexNAc4Hex5NeuAc2@7=51	glycopepnew_HCDEThcDiTCIDpeptide_EThcDpd2	69.267	1	20482	48.5	3.5e-16	1	46736.9	HUMAN	Alpha-1-antitrypsin
[1]		P01009	159	1085.68	5	-1	QLAHQSNSTNIFFSPVSIATAFAMLSLGTK	HexNAc4Hex5NeuAc2+Cation:K@7=66	glycopepnew_HCDEThcDiTCIDpeptide_EThcDpd2	68.417	2	20206	76.6	2e-24	1	46736.9	HUMAN	Alpha-1-antitrypsin
[1]		P01009	159	1398.13	4	1.9	QLAHQSNSTNIFFSPVSIATAFAMLSLGTK	HexNAc5Hex4FucNeuAc2&Oxidation@(7&24)||HexNAc5Hex5NeuAc2@7	glycopepnew_HCDEThcDiTCIDpeptide_EThcDpd2	56.317	1	16360	24.8	9.6e-08	1	46736.9	HUMAN	Alpha-1-antitrypsin
[1]		P01009	159	1361.62	4	2.2	QLAHQSNSTNIFFSPVSIATAFAMLSLGTK	HexNAc5Hex4NeuAc2@7=16;Oxidation@24=16	glycopepnew_HCDEThcDiTCIDpeptide_EThcDpd2	56.7	1	16482	28.3	5.1e-08	1	46736.9	HUMAN	Alpha-1-antitrypsin
[1]		P01009	159	1097.08	5	-1.4	QLAHQSNSTNIFFSPVSIATAFAMLSLGTK	HexNAc5Hex4NeuAc2+Cation:K@7=79;Oxidation@24=79	glycopepnew_HCDEThcDiTCIDpeptide_EThcDpd2	56.5	2	16420	38.6	1.4e-12	1	46736.9	HUMAN	Alpha-1-antitrypsin
[1]		P01009	159	1238.54	5	-0.78	QLAHQSNSTNIFFSPVSIATAFAMLSLGTK	HexNAc5Hex6FucNeuAc3@7=22	glycopepnew_HCDEThcDiTCIDpeptide_EThcDpd2	76.35	2	22771	36.4	1.8e-09	1	46736.9	HUMAN	Alpha-1-antitrypsin
[1]		P01009	159	1082.88	5	1.8	QLAHQSNSTNIFFSPVSIATAFAMLSLGTK	HexNAc6Hex6+Cation:K@7=18	glycopepnew_HCDEThcDiTCIDpeptide_EThcDpd2	68.417	1	20204	14.6	0.00017	1	46736.9	HUMAN	Alpha-1-antitrypsin
[1]		P01009	159	1238.95	5	2.1	QLAHQSNSTNIFFSPVSIATAFAMLSLGTK	HexNAc7Hex8NeuAc@7	glycopepnew_HCDEThcDiTCIDpeptide_EThcDpd2	76.3	1	22750	18.8	3.3e-06	1	46736.9	HUMAN	Alpha-1-antitrypsin
[4]		P01023	96	1346.35	4	0.67	QNMVLFAPNIYVLDYLNETQQLTPEIK	Gln->pyro-Glu@1;HexNAc4Hex5NeuAc2@17	glycopepnew_HCDEThcDiTCIDpeptide_EThcDpd2	84.45	1	25155	32.7	1.6e-09	1	163292	HUMAN	Alpha-2-macroglobulin
[6-1]	30	P19652	74	1205.71	4	-1.9	QNQCFYNSSYLNVQR	HexNAc5Hex6NeuAc3+Cation:K@7=57	glycopepnew_HCDEThcDiTCIDpeptide_EThcDpd2	44.367	2	12479	27.9	8.6e-11	1	23602.8	HUMAN	Alpha-1-acid glycoprotein 2
[6-1]	30	P19652	74	1220.72	4	-0.62	QNQCFYNSSYLNVQR	HexNAc8Hex8+Cation:K@7	glycopepnew_HCDEThcDiTCIDpeptide_EThcDpd2	36.95	2	9948	21	2.4e-07	1	23602.8	HUMAN	Alpha-1-acid glycoprotein 2
[5]		P02787	86	1127.18	4	3.4	QQQHLFGSNVTDCSG	HexNAc6Hex7FucNeuAc+Cation:K@9	glycopepnew_HCDEThcDiTCIDpeptide_EThcDpd2	37.683	1	10197	16	3.3e-06	1	77064.7	HUMAN	Serotransferrin
[5]		P02787	86	986.581	5	6	QQQHLFGSNVTDCSGNF	HexNAc6Hex8FucNeuAc+Cation:K@9	glycopepnew_HCDEThcDiTCIDpeptide_EThcDpd2	42	2	11673	18.1	1.1e-07	1	77064.7	HUMAN	Serotransferrin
[5]		P02787	86	965.158	5	-6.7	QQQHLFGSNVTDCSGNFC	HexNAc7Hex6NeuAc+Cation:K@9=42	glycopepnew_HCDEThcDiTCIDpeptide_EThcDpd2	42.467	1	11842	16	3.4e-06	1	77064.7	HUMAN	Serotransferrin
[5]		P02787	86	1151.96	4	3.5	QQQHLFGSNVTDCSGNFCLF	HexNAc5Hex4NeuAc2@9	glycopepnew_HCDEThcDiTCIDpeptide_EThcDpd2	40.017	2	10989	13.6	3.1e-06	1	77064.7	HUMAN	Serotransferrin
[5]		P02787	86	1181.97	4	5.6	QQQHLFGSNVTDCSGNFCLFR	Gln->pyro-Glu@1;HexNAc4Hex4FucNeuAc2+Cation:K@9	glycopepnew_HCDEThcDiTCIDpeptide_EThcDpd2	50.817	1	14580	37	1.4e-11	1	77064.7	HUMAN	Serotransferrin
[5]		P02787	86	1176.72	4	-5.8	QQQHLFGSNVTDCSGNFCLFR	Gln->pyro-Glu@1;HexNAc4Hex5Fuc2NeuAc@9=13	glycopepnew_HCDEThcDiTCIDpeptide_EThcDpd2	54.317	1	15723	19.9	1.1e-06	1	77064.7	HUMAN	Serotransferrin
[5]		P02787	86	1103.7	4	0.43	QQQHLFGSNVTDCSGNFCLFR	Gln->pyro-Glu@1;HexNAc4Hex5NeuAc@9	glycopepnew_HCDEThcDiTCIDpeptide_EThcDpd2	44.567	1	12540	21.4	1.9e-06	1	77064.7	HUMAN	Serotransferrin
[5]		P02787	86	1113.19	4	-1.8	QQQHLFGSNVTDCSGNFCLFR	Gln->pyro-Glu@1;HexNAc4Hex5NeuAc+Cation:K@9	glycopepnew_HCDEThcDiTCIDpeptide_EThcDpd2	44.483	2	12511	49.6	1.5e-15	1	77064.7	HUMAN	Serotransferrin
[5]		P02787	86	1185.96	4	-1.4	QQQHLFGSNVTDCSGNFCLFR	Gln->pyro-Glu@1;HexNAc4Hex5NeuAc2+Cation:K@9	glycopepnew_HCDEThcDiTCIDpeptide_EThcDpd2	51.133	1	14694	37.5	1.1e-11	1	77064.7	HUMAN	Serotransferrin
[5]		P02787	86	1386.53	4	-0.88	QQQHLFGSNVTDCSGNFCLFR	Gln->pyro-Glu@1;HexNAc5Hex6FucNeuAc3+Cation:K@9	glycopepnew_HCDEThcDiTCIDpeptide_EThcDpd2	59	2	17213	29.6	3.9e-10	1	77064.7	HUMAN	Serotransferrin
[5]		P02787	86	1350.02	4	0.33	QQQHLFGSNVTDCSGNFCLFR	Gln->pyro-Glu@1;HexNAc5Hex6NeuAc3+Cation:K@9	glycopepnew_HCDEThcDiTCIDpeptide_EThcDpd2	58.6	2	17083	19.1	1.6e-06	1	77064.7	HUMAN	Serotransferrin
[5]		P02787	86	1176.48	4	2.4	QQQHLFGSNVTDCSGNFCLFR	Gln->pyro-Glu@1=68;HexNAc4Hex5NeuAc2@9=68	glycopepnew_HCDEThcDiTCIDpeptide_EThcDpd2	50.733	3	14563	45.2	1e-12	1	77064.7	HUMAN	Serotransferrin
[5]		P02787	86	1340.53	4	0.94	QQQHLFGSNVTDCSGNFCLFR	Gln->pyro-Glu@1=79;HexNAc5Hex6NeuAc3@9||HexNAc6Hex9Fuc+Cation:K@9	glycopepnew_HCDEThcDiTCIDpeptide_EThcDpd2	58.683	2	17111	28.4	9.8e-10	1	77064.7	HUMAN	Serotransferrin
[5]		P02787	86	981.588	5	-0.0049	QQQHLFGSNVTDCSGNFCLFR	HexNAc2Hex12+Cation:K@9||HexNAc4Hex5FucNeuAc2+Cation:K@9	glycopepnew_HCDEThcDiTCIDpeptide_EThcDpd2	42	1	11671	50	2.4e-14	1	77064.7	HUMAN	Serotransferrin
[5]		P02787	86	1186.22	4	2.7	QQQHLFGSNVTDCSGNFCLFR	HexNAc4Hex4FucNeuAc2+Cation:K@9=104	glycopepnew_HCDEThcDiTCIDpeptide_EThcDpd2	42.55	2	11865	47.5	8e-18	1	77064.7	HUMAN	Serotransferrin
[5]		P02787	86	1217.24	4	0.55	QQQHLFGSNVTDCSGNFCLFR	HexNAc4Hex5FucNeuAc2@9=48	glycopepnew_HCDEThcDiTCIDpeptide_EThcDpd2	42.133	1	11720	39.9	1.8e-12	1	77064.7	HUMAN	Serotransferrin
[5]		P02787	86	1107.96	4	1.2	QQQHLFGSNVTDCSGNFCLFR	HexNAc4Hex5NeuAc@9=62	glycopepnew_HCDEThcDiTCIDpeptide_EThcDpd2	37.783	1	10231	49	7.4e-14	1	77064.7	HUMAN	Serotransferrin
[5]		P02787	86	894.157	5	-0.68	QQQHLFGSNVTDCSGNFCLFR	HexNAc4Hex5NeuAc+Cation:K@9=121	glycopepnew_HCDEThcDiTCIDpeptide_EThcDpd2	37.617	1	10170	61.8	2.8e-24	1	77064.7	HUMAN	Serotransferrin
[5]		P02787	86	1180.73	4	0.74	QQQHLFGSNVTDCSGNFCLFR	HexNAc4Hex5NeuAc2@9=71	glycopepnew_HCDEThcDiTCIDpeptide_EThcDpd2	42.383	1	11811	46	3.9e-14	1	77064.7	HUMAN	Serotransferrin
[5]		P02787	86	952.376	5	-0.74	QQQHLFGSNVTDCSGNFCLFR	HexNAc4Hex5NeuAc2+Cation:K@9=89	glycopepnew_HCDEThcDiTCIDpeptide_EThcDpd2	42.733	1	11920	66	3.1e-22	1	77064.7	HUMAN	Serotransferrin
[5]		P02787	86	1195.49	4	-6.4	QQQHLFGSNVTDCSGNFCLFR	HexNAc5Hex5Fuc3@9=10	glycopepnew_HCDEThcDiTCIDpeptide_EThcDpd2	42.1	2	11706	18.5	1e-05	1	77064.7	HUMAN	Serotransferrin
[5]		P02787	86	1195.25	4	5.6	QQQHLFGSNVTDCSGNFCLFR	HexNAc5Hex5FucNeuAc@9=53	glycopepnew_HCDEThcDiTCIDpeptide_EThcDpd2	42.35	1	11795	25.8	9.5e-09	1	77064.7	HUMAN	Serotransferrin
[5]		P02787	86	1381.3	4	-1.2	QQQHLFGSNVTDCSGNFCLFR	HexNAc5Hex6FucNeuAc3@9	glycopepnew_HCDEThcDiTCIDpeptide_EThcDpd2	47.633	1	13557	22.8	1.8e-05	1	77064.7	HUMAN	Serotransferrin
[5]		P02787	86	1025.4	5	-2.2	QQQHLFGSNVTDCSGNFCLFR	HexNAc5Hex6NeuAc2+Cation:K@9=98	glycopepnew_HCDEThcDiTCIDpeptide_EThcDpd2	42.017	1	11675	42	5.9e-18	1	77064.7	HUMAN	Serotransferrin
[5]		P02787	86	1355.02	4	-7.9	QQQHLFGSNVTDCSGNFCLFR	HexNAc7Hex8Fuc+Cation:K@9	glycopepnew_HCDEThcDiTCIDpeptide_EThcDpd2	47.617	1	13555	33.6	3.6e-11	1	77064.7	HUMAN	Serotransferrin
[1]		P01009	159	1235.05	4	1.3	QSNSTNIFFSPVSIATAFAMLSLGTK	Gln->pyro-Glu&HexNAc4Hex6FucNeuAc@(1&3)||HexNAc4Hex5NeuAc2@3	glycopepnew_HCDEThcDiTCIDpeptide_EThcDpd2	79.683	1	23814	31.8	9.3e-08	1	46736.9	HUMAN	Alpha-1-antitrypsin
[1]		P01009	159	1240.54	4	3.7	QSNSTNIFFSPVSIATAFAMLSLGTK	HexNAc4Hex4FucNeuAc2+Cation:K@3=13	glycopepnew_HCDEThcDiTCIDpeptide_EThcDpd2	79.85	1	23865	36.6	1.5e-08	1	46736.9	HUMAN	Alpha-1-antitrypsin
[1]		P01009	159	908.719	6	-4.6	QSNSTNIFFSPVSIATAFAMLSLGTK	HexNAc6Hex9+Cation:K@3	glycopepnew_HCDEThcDiTCIDpeptide_EThcDpd2	80.317	1	24007	21	2.2e-10	1	46736.9	HUMAN	Alpha-1-antitrypsin
[16]		P04217	15	1372.16	5	-2.9	REGDHEFLEVPEAQEDVEATFPVHQPGNYSCSYR	HexNAc7Hex8Fuc@28	glycopepnew_HCDEThcDiTCIDpeptide_EThcDpd2	41.15	1	11379	26.5	6.6e-08	1	54254	HUMAN	Alpha-1B-glycoprotein
[2]		P01876	150	933.58	5	-4.8	SEANLTCTLTGLR	HexNAc6Hex7Fuc4NeuAc@4	glycopepnew_HCDEThcDiTCIDpeptide_EThcDpd2	66.2	1	19511	14.8	2.1e-06	2	37655	HUMAN	Immunoglobulin heavy constant alpha 1
[3]		P00738	120	1313.39	5	7.1	SFPWQAKMVSHHNLTTGATLINEQWLLTTAK	Oxidation@4=27;Oxidation@8=27;HexNAc5Hex6FucNeuAc3@13	glycopepnew_HCDEThcDiTCIDpeptide_EThcDpd2	39.917	1	10951	14.8	5.2e-05	1	45205.7	HUMAN	Haptoglobin
[12]		P08185	24	1159.22	4	-6.2	SGLWTVQAMDPNAAYVNMSNHHR	Oxidation@4=24;HexNAc3Hex6FucNeuAc@17=24	glycopepnew_HCDEThcDiTCIDpeptide_EThcDpd2	80	1	23911	13.7	2e-05	1	45141.3	HUMAN	Corticosteroid-binding globulin
[47]		P04278	1	1128.19	4	0.055	SHEIWTHSCPQSPGNGTDASH	HexNAc4Hex5NeuAc2@15	glycopepnew_HCDEThcDiTCIDpeptide_EThcDpd2	20.45	1	4478	35.6	1.3e-14	1	43779.6	HUMAN	Sex hormone-binding globulin
[3]		P00738	120	1193.28	4	-7.5	SHHNLTTGATLINEQWLLTTAK	HexNAc6Hex5Fuc2@4	glycopepnew_HCDEThcDiTCIDpeptide_EThcDpd2	37.933	1	10281	33.5	9.4e-09	1	45205.7	HUMAN	Haptoglobin
[4]		P01023	96	887.12	4	-0.76	SINTTNVMGTSLTVR	HexNAc4Hex5NeuAc+Cation:K@3=45	glycopepnew_HCDEThcDiTCIDpeptide_EThcDpd2	33.983	1	8949	50	1.7e-14	1	163292	HUMAN	Alpha-2-macroglobulin
[4]		P01023	96	901.374	4	-1.4	SINTTNVMGTSLTVR	HexNAc5Hex4NeuAc+Cation:K@3;Oxidation@8	glycopepnew_HCDEThcDiTCIDpeptide_EThcDpd2	21.183	2	4733	13.2	0.00012	1	163292	HUMAN	Alpha-2-macroglobulin
[34]		P05156	4	1303.8	4	0.013	SIPACVPWSPYLFQPNDTCIVSGWGR	HexNAc4Hex5NeuAc2@16	glycopepnew_HCDEThcDiTCIDpeptide_EThcDpd2	61.4	2	17990	43.5	1.4e-11	1	65751	HUMAN	Complement factor I
[30]		P01042	5	820.563	4	-2.4	SIVQTNCSK	HexNAc4Hex5NeuAc2+Cation:K@6	glycopepnew_HCDEThcDiTCIDpeptide_EThcDpd2	19.567	1	4162	12.3	4.8e-05	1	71958	HUMAN	Kininogen-1
[4]		P01023	96	1117.76	4	0.3	SLGNVNFTVSAEALESQELCGTEVPSVPEHGR	HexNAc2Hex4@6	glycopepnew_HCDEThcDiTCIDpeptide_EThcDpd2	40.7	1	11230	16.6	3.4e-05	1	163292	HUMAN	Alpha-2-macroglobulin
[4]		P01023	96	1158.27	4	0.91	SLGNVNFTVSAEALESQELCGTEVPSVPEHGR	HexNAc2Hex5@6	glycopepnew_HCDEThcDiTCIDpeptide_EThcDpd2	39.15	3	10692	49.7	1.1e-10	1	163292	HUMAN	Alpha-2-macroglobulin
[4]		P01023	96	934.409	5	1.7	SLGNVNFTVSAEALESQELCGTEVPSVPEHGR	HexNAc2Hex5+Cation:K@6	glycopepnew_HCDEThcDiTCIDpeptide_EThcDpd2	50.5	1	14484	50.8	5.1e-22	1	163292	HUMAN	Alpha-2-macroglobulin
[4]		P01023	96	1025.65	5	1.9	SLGNVNFTVSAEALESQELCGTEVPSVPEHGR	HexNAc3Hex5NeuAc@6	glycopepnew_HCDEThcDiTCIDpeptide_EThcDpd2	42.6	2	11880	44	8.2e-13	1	163292	HUMAN	Alpha-2-macroglobulin
[4]		P01023	96	1073.85	5	-5.6	SLGNVNFTVSAEALESQELCGTEVPSVPEHGR	HexNAc4Hex5NeuAc+Cation:K@6	glycopepnew_HCDEThcDiTCIDpeptide_EThcDpd2	42.867	1	11968	71	3.1e-25	1	163292	HUMAN	Alpha-2-macroglobulin
[15]		P01008	14	1096.46	4	-1.1	SLTFNETYQDISELVYGAK	HexNAc4Hex5NeuAc2@5	glycopepnew_HCDEThcDiTCIDpeptide_EThcDpd2	60.933	2	17833	36.4	3.3e-12	1	52602.9	HUMAN	Antithrombin-III
[15]		P01008	14	1105.95	4	-2.3	SLTFNETYQDISELVYGAK	HexNAc4Hex5NeuAc2+Cation:K@5	glycopepnew_HCDEThcDiTCIDpeptide_EThcDpd2	60.733	2	17770	46.9	3.1e-15	1	52602.9	HUMAN	Antithrombin-III
[4]		P01023	96	1322.58	4	-5.9	SNATTDEHGLVQFSINTTNVMGTSLTVRVNYK	HexNAc4Hex4NeuAc+Cation:K@16=18	glycopepnew_HCDEThcDiTCIDpeptide_EThcDpd2	66.517	2	19615	10.3	0.00012	1	163292	HUMAN	Alpha-2-macroglobulin
[1]		P01009	159	1395.34	4	-0.21	SNSTNIFFSPVSIATAFAMLSLGTK	HexNAc6Hex7Fuc2NeuAc+Cation:K@2=23	glycopepnew_HCDEThcDiTCIDpeptide_EThcDpd2	80.1	1	23943	39.2	2.1e-09	1	46736.9	HUMAN	Alpha-1-antitrypsin
[5]		P02787	86	959.964	5	5.1	SNVTDCSGNFCLFR	HexNAc6Hex7FucNeuAc2+Cation:K@2	glycopepnew_HCDEThcDiTCIDpeptide_EThcDpd2	42.6	1	11878	28.6	1e-09	1	77064.7	HUMAN	Serotransferrin
[18]		P00734	12	1290.8	4	-0.37	SRYPHKPEINSTTHPGADLQENFCR	HexNAc4Hex5Fuc2NeuAc@10=10	glycopepnew_HCDEThcDiTCIDpeptide_EThcDpd2	22.567	1	5189	32.9	2.8e-10	1	70037.5	HUMAN	Prothrombin
[6]		P02763	91	1227.5	3	-4.6	SVQEIQATFFYFTPN	HexNAc6Hex3Fuc+Cation:K@15	glycopepnew_HCDEThcDiTCIDpeptide_EThcDpd2	62.867	2	18459	13	1.2e-05	2	23511.8	HUMAN	Alpha-1-acid glycoprotein 1
[6]		P02763	91	1031.94	4	0.95	SVQEIQATFFYFTPNK	HexNAc4Hex5NeuAc2@15	glycopepnew_HCDEThcDiTCIDpeptide_EThcDpd2	54.7	1	15843	29.8	1.8e-08	2	23511.8	HUMAN	Alpha-1-acid glycoprotein 1
[6]		P02763	91	1041.43	4	-0.54	SVQEIQATFFYFTPNK	HexNAc4Hex5NeuAc2+Cation:K@15	glycopepnew_HCDEThcDiTCIDpeptide_EThcDpd2	53.617	1	15497	35.7	2.1e-13	2	23511.8	HUMAN	Alpha-1-acid glycoprotein 1
[6]		P02763	91	1232.51	4	-0.77	SVQEIQATFFYFTPNK	HexNAc5Hex6FucNeuAc3@15	glycopepnew_HCDEThcDiTCIDpeptide_EThcDpd2	64.433	2	18949	20.5	5.5e-07	2	23511.8	HUMAN	Alpha-1-acid glycoprotein 1
[6]		P02763	91	1059.93	4	-3.5	SVQEIQATFFYFTPNK	HexNAc5Hex6NeuAc+Cation:K@15	glycopepnew_HCDEThcDiTCIDpeptide_EThcDpd2	45.967	1	13015	34.4	2.3e-12	2	23511.8	HUMAN	Alpha-1-acid glycoprotein 1
[6]		P02763	91	1195.99	4	-0.22	SVQEIQATFFYFTPNK	HexNAc5Hex6NeuAc3@15||HexNAc6Hex9Fuc+Cation:K@15	glycopepnew_HCDEThcDiTCIDpeptide_EThcDpd2	62.217	2	18261	28.9	3.6e-09	2	23511.8	HUMAN	Alpha-1-acid glycoprotein 1
[6]		P02763	91	1205.48	4	-0.8	SVQEIQATFFYFTPNK	HexNAc5Hex6NeuAc3+Cation:K@15	glycopepnew_HCDEThcDiTCIDpeptide_EThcDpd2	63.267	2	18578	33.5	7.7e-11	2	23511.8	HUMAN	Alpha-1-acid glycoprotein 1
[6]		P02763	91	1369.79	4	-2.6	SVQEIQATFFYFTPNK	HexNAc6Hex7Fuc2NeuAc3+Cation:K@15=14	glycopepnew_HCDEThcDiTCIDpeptide_EThcDpd2	80.817	1	24153	18.5	4.2e-08	2	23511.8	HUMAN	Alpha-1-acid glycoprotein 1
[6]		P02763	91	1287.78	4	-7.5	SVQEIQATFFYFTPNK	HexNAc6Hex7Fuc4NeuAc@15	glycopepnew_HCDEThcDiTCIDpeptide_EThcDpd2	64.783	2	19062	16	2.1e-05	2	23511.8	HUMAN	Alpha-1-acid glycoprotein 1
[6]		P02763	91	1214.51	4	2	SVQEIQATFFYFTPNK	HexNAc6Hex7NeuAc2@15=11	glycopepnew_HCDEThcDiTCIDpeptide_EThcDpd2	53.033	1	15313	27.3	5.5e-09	2	23511.8	HUMAN	Alpha-1-acid glycoprotein 1
[6]		P02763	91	1296.76	4	-1.1	SVQEIQATFFYFTPNK	HexNAc6Hex7NeuAc3+Cation:K@15	glycopepnew_HCDEThcDiTCIDpeptide_EThcDpd2	63.75	1	18729	26.6	4.5e-08	2	23511.8	HUMAN	Alpha-1-acid glycoprotein 1
[6]		P02763	91	1360.05	4	0.96	SVQEIQATFFYFTPNK	HexNAc6Hex7NeuAc4@15	glycopepnew_HCDEThcDiTCIDpeptide_EThcDpd2	80.75	1	24133	24	3.4e-11	2	23511.8	HUMAN	Alpha-1-acid glycoprotein 1
[6]		P02763	91	1369.53	4	-5.2	SVQEIQATFFYFTPNK	HexNAc6Hex7NeuAc4+Cation:K@15	glycopepnew_HCDEThcDiTCIDpeptide_EThcDpd2	81.567	2	24377	24	8.2e-08	2	23511.8	HUMAN	Alpha-1-acid glycoprotein 1
[6]		P02763	91	1242.5	4	-4.5	SVQEIQATFFYFTPNK	HexNAc7Hex8NeuAc+Cation:K@15	glycopepnew_HCDEThcDiTCIDpeptide_EThcDpd2	64.517	2	18977	10	8.7e-05	2	23511.8	HUMAN	Alpha-1-acid glycoprotein 1
[6]		P02763	91	1227.83	3	-4	SVQEIQATFFYFTPNKTED	HexNAc2Hex6+Cation:K@15	glycopepnew_HCDEThcDiTCIDpeptide_EThcDpd2	62.967	1	18482	18.1	9.1e-09	2	23511.8	HUMAN	Alpha-1-acid glycoprotein 1
[6]		P02763	91	1201.23	4	-6.5	SVQEIQATFFYFTPNKTED	HexNAc6Hex7Fuc+Cation:K@15	glycopepnew_HCDEThcDiTCIDpeptide_EThcDpd2	53.017	1	15311	21.7	5.4e-07	2	23511.8	HUMAN	Alpha-1-acid glycoprotein 1
[6]		P02763	91	1355.8	4	-7	SVQEIQATFFYFTPNKTED	HexNAc7Hex8FucNeuAc@15	glycopepnew_HCDEThcDiTCIDpeptide_EThcDpd2	63.1	1	18526	16.6	6.2e-06	2	23511.8	HUMAN	Alpha-1-acid glycoprotein 1
[6]		P02763	91	1191.49	4	-1.1	SVQEIQATFFYFTPNKTED	HexNAc9Hex3Fuc+Cation:K@15=7	glycopepnew_HCDEThcDiTCIDpeptide_EThcDpd2	53.217	2	15374	22.9	6.5e-06	2	23511.8	HUMAN	Alpha-1-acid glycoprotein 1
[6]		P02763	91	1379.06	4	-0.86	SVQEIQATFFYFTPNKTEDT	HexNAc6Hex11Fuc@15	glycopepnew_HCDEThcDiTCIDpeptide_EThcDpd2	61.983	1	18177	13	0.00013	2	23511.8	HUMAN	Alpha-1-acid glycoprotein 1
[6]		P02763	91	1360.31	4	-3.1	SVQEIQATFFYFTPNKTEDTI	HexNAc8Hex8+Cation:K@15	glycopepnew_HCDEThcDiTCIDpeptide_EThcDpd2	82.95	2	24778	22.6	1.9e-08	2	23511.8	HUMAN	Alpha-1-acid glycoprotein 1
[6]		P02763	91	1031.94	4	-5.4	SVQEIQATFFYFTPNKTEDTIF	HexNAc4Hex4+Cation:K@15	glycopepnew_HCDEThcDiTCIDpeptide_EThcDpd2	53.683	2	15523	41.5	7e-14	2	23511.8	HUMAN	Alpha-1-acid glycoprotein 1
[6]		P02763	91	1287.28	4	-5.6	SVQEIQATFFYFTPNKTEDTIF	HexNAc6Hex6NeuAc+Cation:K@15	glycopepnew_HCDEThcDiTCIDpeptide_EThcDpd2	61.967	3	18172	27.1	3.9e-10	2	23511.8	HUMAN	Alpha-1-acid glycoprotein 1
[6]		P02763	91	1232.92	5	4.8	SVQEIQATFFYFTPNKTEDTIFLR	HexNAc6Hex7Fuc2NeuAc2+Cation:K@15=20	glycopepnew_HCDEThcDiTCIDpeptide_EThcDpd2	59.5	2	17372	36.6	2.8e-14	2	23511.8	HUMAN	Alpha-1-acid glycoprotein 1
[6]		P02763	91	1200.92	5	6.9	SVQEIQATFFYFTPNKTEDTIFLR	HexNAc8Hex8Fuc+Cation:K@15	glycopepnew_HCDEThcDiTCIDpeptide_EThcDpd2	52.683	1	15198	18.8	2.9e-06	2	23511.8	HUMAN	Alpha-1-acid glycoprotein 1
[7]		P02790	44	949.118	4	-1.1	SWPAVGNCSSALR	HexNAc4Hex5FucNeuAc2+Cation:K@7	glycopepnew_HCDEThcDiTCIDpeptide_EThcDpd2	36.583	1	9816	35.9	7.2e-13	1	51676.8	HUMAN	Hemopexin
[7]		P02790	44	903.117	4	1.1	SWPAVGNCSSALR	HexNAc4Hex5NeuAc2@7	glycopepnew_HCDEThcDiTCIDpeptide_EThcDpd2	36.35	1	9741	27.2	3.6e-11	1	51676.8	HUMAN	Hemopexin
[7]		P02790	44	912.603	4	-1.6	SWPAVGNCSSALR	HexNAc4Hex5NeuAc2+Cation:K@7=35	glycopepnew_HCDEThcDiTCIDpeptide_EThcDpd2	36.267	1	9711	51.6	1.2e-11	1	51676.8	HUMAN	Hemopexin
[4]		P01023	96	1167.24	4	7.5	SYLNETVTVSASLESVR	HexNAc6Hex6NeuAc2+Cation:K@4	glycopepnew_HCDEThcDiTCIDpeptide_EThcDpd2	64.717	2	19042	20.5	3.5e-05	1	163292	HUMAN	Alpha-2-macroglobulin
[1]		P01009	159	1288.76	5	-0.2	THDEILEGLNFNLTEIPEAQIHEGFQELLR	HexNAc5Hex8Fuc4+Cation:K@12	glycopepnew_HCDEThcDiTCIDpeptide_EThcDpd2	60.15	2	17580	13.2	4.2e-05	1	46736.9	HUMAN	Alpha-1-antitrypsin
[10-1]	19	P01859	24	834.36	4	-0.85	TKPREEQFNSTFR	HexNAc3Hex4FucNeuAc@9	glycopepnew_HCDEThcDiTCIDpeptide_EThcDpd2	16.65	2	3154	27.9	1.5e-07	1	35901	HUMAN	Immunoglobulin heavy constant gamma 2
[10-1]	19	P01859	24	812.357	4	0.91	TKPREEQFNSTFR	HexNAc4Hex4Fuc@9	glycopepnew_HCDEThcDiTCIDpeptide_EThcDpd2	15.567	1	2767	25.1	5.5e-09	1	35901	HUMAN	Immunoglobulin heavy constant gamma 2
[11]		P01011	24	1114.7	4	-2	TLNQSSDELQLSMGNAMFVK	HexNAc4Hex5NeuAc2+Cation:K@3=78	glycopepnew_HCDEThcDiTCIDpeptide_EThcDpd2	49.517	2	14171	48.1	5.6e-17	1	47651.3	HUMAN	Alpha-1-antichymotrypsin
[11]		P01011	24	1270.02	4	-5.6	TLNQSSDELQLSMGNAMFVK	HexNAc7Hex8Fuc@3	glycopepnew_HCDEThcDiTCIDpeptide_EThcDpd2	61.033	2	17864	17.9	4.1e-06	1	47651.3	HUMAN	Alpha-1-antichymotrypsin
[2-1]	33	P01877	119	692.042	4	-2.4	TPLTANITK	HexNAc4Hex5Fuc+Cation:K@6	glycopepnew_HCDEThcDiTCIDpeptide_EThcDpd2	18.417	1	3771	25.2	2.2e-10	1	36591.7	HUMAN	Immunoglobulin heavy constant alpha 2
[2-1]	33	P01877	119	764.816	4	-1.7	TPLTANITK	HexNAc4Hex5FucNeuAc+Cation:K@6	glycopepnew_HCDEThcDiTCIDpeptide_EThcDpd2	22.617	2	5211	27.4	2.3e-10	1	36591.7	HUMAN	Immunoglobulin heavy constant alpha 2
[2-1]	33	P01877	119	702.298	4	-3.2	TPLTANITK	HexNAc5Hex4Fuc+Cation:K@6	glycopepnew_HCDEThcDiTCIDpeptide_EThcDpd2	18.85	1	3920	13.9	6.3e-07	1	36591.7	HUMAN	Immunoglobulin heavy constant alpha 2
[2-1]	33	P01877	119	742.811	4	-2.9	TPLTANITK	HexNAc5Hex5Fuc+Cation:K@6	glycopepnew_HCDEThcDiTCIDpeptide_EThcDpd2	18.617	1	3839	27.4	6.3e-08	1	36591.7	HUMAN	Immunoglobulin heavy constant alpha 2
[2-1]	33	P01877	119	815.586	4	-1.8	TPLTANITK	HexNAc5Hex5FucNeuAc+Cation:K@6	glycopepnew_HCDEThcDiTCIDpeptide_EThcDpd2	22.7	1	5234	32.5	9.8e-11	1	36591.7	HUMAN	Immunoglobulin heavy constant alpha 2
[21]		P43652	10	1377.57	4	1.5	TTCCTLSEEFACVDNLADLVFGELCGVNENR	HexNAc4Hex5NeuAc@30	glycopepnew_HCDEThcDiTCIDpeptide_EThcDpd2	68.133	1	20114	24.2	3.2e-08	1	69069.8	HUMAN	Afamin
[21]		P43652	10	1160.47	5	0.36	TTCCTLSEEFACVDNLADLVFGELCGVNENR	HexNAc4Hex5NeuAc2@30	glycopepnew_HCDEThcDiTCIDpeptide_EThcDpd2	75.933	1	22634	17.6	4e-08	1	69069.8	HUMAN	Afamin
[8]		P01024	32	994.428	3	-0.071	TVLTPATNHMGNVTF	HexNAc2Hex6@12=10	glycopepnew_HCDEThcDiTCIDpeptide_EThcDpd2	30.983	1	7933	23.2	1.2e-07	1	187150	HUMAN	Complement C3
[8]		P01024	32	878.635	4	-2.7	TVLTPATNHMGNVTFTI	HexNAc3Hex4FucNeuAc@12	glycopepnew_HCDEThcDiTCIDpeptide_EThcDpd2	32.333	1	8389	19	3.5e-07	1	187150	HUMAN	Complement C3
[8]		P01024	32	1103.85	3	-0.19	TVLTPATNHMGNVTFTIPANR	HexNAc2Hex4@12=10	glycopepnew_HCDEThcDiTCIDpeptide_EThcDpd2	31.233	2	8035	33	3.7e-12	1	187150	HUMAN	Complement C3
[8]		P01024	32	874.148	4	7.5	TVLTPATNHMGNVTFTIPANR	HexNAc2Hex4Fuc+Cation:K@12=10	glycopepnew_HCDEThcDiTCIDpeptide_EThcDpd2	31.017	2	7950	52.6	1.1e-17	1	187150	HUMAN	Complement C3
[8]		P01024	32	868.653	4	1.5	TVLTPATNHMGNVTFTIPANR	HexNAc2Hex5@12=9	glycopepnew_HCDEThcDiTCIDpeptide_EThcDpd2	31.017	1	7948	66	2.4e-20	1	187150	HUMAN	Complement C3
[8]		P01024	32	909.166	4	1.5	TVLTPATNHMGNVTFTIPANR	HexNAc2Hex5Fuc&Oxidation@(12&10)||HexNAc2Hex6@12	glycopepnew_HCDEThcDiTCIDpeptide_EThcDpd2	30.933	1	7912	64.1	1.2e-17	1	187150	HUMAN	Complement C3
[8]		P01024	32	959.165	4	-1.4	TVLTPATNHMGNVTFTIPANR	HexNAc2Hex7+Cation:K@12=11	glycopepnew_HCDEThcDiTCIDpeptide_EThcDpd2	30.883	1	7895	46.8	3.2e-17	1	187150	HUMAN	Complement C3
[8]		P01024	32	1032.71	4	1.7	TVLTPATNHMGNVTFTIPANR	HexNAc3Hex5FucNeuAc&Oxidation@(12&10)||HexNAc3Hex6NeuAc@12	glycopepnew_HCDEThcDiTCIDpeptide_EThcDpd2	34.467	1	9104	45.2	3.7e-12	1	187150	HUMAN	Complement C3
[8]		P01024	32	1042.2	4	-0.87	TVLTPATNHMGNVTFTIPANR	HexNAc3Hex6NeuAc+Cation:K@12=11	glycopepnew_HCDEThcDiTCIDpeptide_EThcDpd2	34.467	2	9106	41	6.1e-15	1	187150	HUMAN	Complement C3
[8]		P01024	32	882.908	4	1.4	TVLTPATNHMGNVTFTIPANR	Oxidation@10;HexNAc3Hex4@12	glycopepnew_HCDEThcDiTCIDpeptide_EThcDpd2	22.883	1	5297	42.9	4e-10	1	187150	HUMAN	Complement C3
[8]		P01024	32	923.422	4	1.8	TVLTPATNHMGNVTFTIPANR	Oxidation@10;HexNAc3Hex5@12	glycopepnew_HCDEThcDiTCIDpeptide_EThcDpd2	22.767	2	5257	36.8	2.3e-08	1	187150	HUMAN	Complement C3
[8]		P01024	32	746.528	5	-0.42	TVLTPATNHMGNVTFTIPANR	Oxidation@10;HexNAc3Hex5+Cation:K@12	glycopepnew_HCDEThcDiTCIDpeptide_EThcDpd2	22.8	1	5268	37	2.2e-10	1	187150	HUMAN	Complement C3
[8]		P01024	32	963.934	4	1.1	TVLTPATNHMGNVTFTIPANR	Oxidation@10;HexNAc3Hex6@12	glycopepnew_HCDEThcDiTCIDpeptide_EThcDpd2	22.633	1	5213	28.7	1.9e-06	1	187150	HUMAN	Complement C3
[8]		P01024	32	897.168	4	2.9	TVLTPATNHMGNVTFTIPANREF	HexNAc2Hex3Fuc&Oxidation@(12&10)||HexNAc2Hex4@12	glycopepnew_HCDEThcDiTCIDpeptide_EThcDpd2	22.817	2	5281	22	1.9e-05	1	187150	HUMAN	Complement C3
[19]		P02765	10	1027.19	4	4.3	VCQDCPLLAPLNDTRVVHA	HexNAc3Hex7Fuc+Cation:K@12	glycopepnew_HCDEThcDiTCIDpeptide_EThcDpd2	35.983	1	9621	16	7e-05	1	39325	HUMAN	Alpha-2-HS-glycoprotein
[22]		O75882	8	759.858	4	1.2	VFHIHNESWVLLTPK	HexNAc2Hex5@6=21	glycopepnew_HCDEThcDiTCIDpeptide_EThcDpd2	28.85	1	7242	25.1	5.2e-07	1	158538	HUMAN	Attractin
[22]		O75882	8	851.142	4	1.5	VFHIHNESWVLLTPK	HexNAc3Hex6@6=61	glycopepnew_HCDEThcDiTCIDpeptide_EThcDpd2	28.6	1	7167	40.9	2.9e-16	1	158538	HUMAN	Attractin
[2-1]	33	P01877	119	1229.54	6	-2	VFPLSLDSTPQDGNVVVACLVQGFFPQEPLSVTWSESGQNVT	HexNAc6Hex9Fuc@40=11	glycopepnew_HCDEThcDiTCIDpeptide_EThcDpd2	73.833	1	21959	19.3	3.7e-07	1	36591.7	HUMAN	Immunoglobulin heavy constant alpha 2
[2-1]	33	P01877	119	1375.62	5	-0.4	VFPLSLDSTPQDGNVVVACLVQGFFPQEPLSVTWSESGQNVTAR	HexNAc4Hex4Fuc2NeuAc+Cation:K&Oxidation@(40&34)||HexNAc4Hex5FucNeuAc+Cation:K@40	glycopepnew_HCDEThcDiTCIDpeptide_EThcDpd2	66.617	1	19644	26.6	8.8e-09	1	36591.7	HUMAN	Immunoglobulin heavy constant alpha 2
[2-1]	33	P01877	119	1375.81	5	-5.3	VFPLSLDSTPQDGNVVVACLVQGFFPQEPLSVTWSESGQNVTAR	HexNAc4Hex5Fuc3+Cation:K@40=9	glycopepnew_HCDEThcDiTCIDpeptide_EThcDpd2	66.85	1	19711	26.8	2e-07	1	36591.7	HUMAN	Immunoglobulin heavy constant alpha 2
[2-1]	33	P01877	119	1195.2	6	-4.7	VFPLSLDSTPQDGNVVVACLVQGFFPQEPLSVTWSESGQNVTAR	HexNAc4Hex5Fuc3NeuAc+Cation:K@40=25	glycopepnew_HCDEThcDiTCIDpeptide_EThcDpd2	73.6	1	21887	44	3.9e-11	1	36591.7	HUMAN	Immunoglobulin heavy constant alpha 2
[2-1]	33	P01877	119	1048.33	7	-1.9	VFPLSLDSTPQDGNVVVACLVQGFFPQEPLSVTWSESGQNVTAR	HexNAc7Hex7@40	glycopepnew_HCDEThcDiTCIDpeptide_EThcDpd2	73.517	1	21861	21	3.5e-07	1	36591.7	HUMAN	Immunoglobulin heavy constant alpha 2
[2-1]	33	P01877	119	1385.41	5	-4.1	VFPLSLDSTPQDGNVVVACLVQGFFPQEPLSVTWSESGQNVTAR	Oxidation@34;HexNAc4Hex7Fuc+Cation:K@40	glycopepnew_HCDEThcDiTCIDpeptide_EThcDpd2	66.467	2	19601	24.4	1.6e-05	1	36591.7	HUMAN	Immunoglobulin heavy constant alpha 2
[2-1]	33	P01877	119	1233.04	6	-3	VFPLSLDSTPQDGNVVVACLVQGFFPQEPLSVTWSESGQNVTARN	Oxidation@34;HexNAc6Hex4NeuAc2+Cation:K@40	glycopepnew_HCDEThcDiTCIDpeptide_EThcDpd2	73.317	1	21794	13.6	4.9e-05	1	36591.7	HUMAN	Immunoglobulin heavy constant alpha 2
[2-1]	33	P01877	119	1233.37	6	-8	VFPLSLDSTPQDGNVVVACLVQGFFPQEPLSVTWSESGQNVTARNF	HexNAc6Hex5NeuAc+Cation:K@40	glycopepnew_HCDEThcDiTCIDpeptide_EThcDpd2	73.833	2	21961	13.6	5.4e-05	1	36591.7	HUMAN	Immunoglobulin heavy constant alpha 2
[2-1]	33	P01877	119	1226.06	6	-0.11	VFPLSLDSTPQDGNVVVACLVQGFFPQEPLSVTWSESGQNVTARNFPPSQ	HexNAc6Hex3Fuc+Cation:K&Oxidation@(40&34)||HexNAc6Hex4+Cation:K@40	glycopepnew_HCDEThcDiTCIDpeptide_EThcDpd2	73.817	1	21957	10.6	0.00017	1	36591.7	HUMAN	Immunoglobulin heavy constant alpha 2
[26]		P05155	7	912.022	5	-3.1	VGQLQLSHNLSLVILVPQNLK	HexNAc4Hex5NeuAc2+Cation:K@9	glycopepnew_HCDEThcDiTCIDpeptide_EThcDpd2	49.433	1	14142	46.8	4.9e-15	1	55154.7	HUMAN	Plasma protease C1 inhibitor
[4]		P01023	96	1037.44	4	-0.67	VLDYLNETQQLTPEIK	HexNAc4Hex5NeuAc2+Cation:K@6	glycopepnew_HCDEThcDiTCIDpeptide_EThcDpd2	46.55	1	13208	46.4	2.3e-14	1	163292	HUMAN	Alpha-2-macroglobulin
[26]		P05155	7	1077.22	4	2.4	VLSNNSDANLELINTWVAK	HexNAc4Hex5NeuAc2@4	glycopepnew_HCDEThcDiTCIDpeptide_EThcDpd2	51.383	2	14776	47.1	5e-12	1	55154.7	HUMAN	Plasma protease C1 inhibitor
[4]		P01023	96	1138.75	4	-0.78	VSNQTLSLFFTVLQDVPVR	HexNAc2Hex12+Cation:K@3||HexNAc4Hex5FucNeuAc2+Cation:K@3	glycopepnew_HCDEThcDiTCIDpeptide_EThcDpd2	68.75	2	20318	45.4	1.5e-14	1	163292	HUMAN	Alpha-2-macroglobulin
[4]		P01023	96	1098.24	4	3.9	VSNQTLSLFFTVLQDVPVR	HexNAc4Hex4FucNeuAc2+Cation:K@3	glycopepnew_HCDEThcDiTCIDpeptide_EThcDpd2	67.583	2	19951	46.2	5e-15	1	163292	HUMAN	Alpha-2-macroglobulin
[4]		P01023	96	1056.49	4	1.4	VSNQTLSLFFTVLQDVPVR	HexNAc4Hex5FucNeuAc@3	glycopepnew_HCDEThcDiTCIDpeptide_EThcDpd2	59.4	1	17340	49.2	7.9e-12	1	163292	HUMAN	Alpha-2-macroglobulin
[4]		P01023	96	1065.97	4	-1.7	VSNQTLSLFFTVLQDVPVR	HexNAc4Hex5FucNeuAc+Cation:K@3	glycopepnew_HCDEThcDiTCIDpeptide_EThcDpd2	59.4	2	17345	52.9	7.2e-17	1	163292	HUMAN	Alpha-2-macroglobulin
[4]		P01023	96	1129.26	4	1.8	VSNQTLSLFFTVLQDVPVR	HexNAc4Hex5FucNeuAc2@3	glycopepnew_HCDEThcDiTCIDpeptide_EThcDpd2	68.85	1	20348	30.2	6.9e-07	1	163292	HUMAN	Alpha-2-macroglobulin
[4]		P01023	96	1019.97	4	1.2	VSNQTLSLFFTVLQDVPVR	HexNAc4Hex5NeuAc@3	glycopepnew_HCDEThcDiTCIDpeptide_EThcDpd2	59.517	1	17377	61.8	6.6e-15	1	163292	HUMAN	Alpha-2-macroglobulin
[4]		P01023	96	1029.46	4	-1.4	VSNQTLSLFFTVLQDVPVR	HexNAc4Hex5NeuAc+Cation:K@3	glycopepnew_HCDEThcDiTCIDpeptide_EThcDpd2	59.683	1	17423	53	1.4e-17	1	163292	HUMAN	Alpha-2-macroglobulin
[4]		P01023	96	1092.74	4	-0.78	VSNQTLSLFFTVLQDVPVR	HexNAc4Hex5NeuAc2@3	glycopepnew_HCDEThcDiTCIDpeptide_EThcDpd2	67.983	1	20075	43.9	1.5e-11	1	163292	HUMAN	Alpha-2-macroglobulin
[4]		P01023	96	1184.28	4	-0.67	VSNQTLSLFFTVLQDVPVR	HexNAc5Hex6Fuc2NeuAc@3=18	glycopepnew_HCDEThcDiTCIDpeptide_EThcDpd2	67.5	1	19920	34	7.5e-10	1	163292	HUMAN	Alpha-2-macroglobulin
[4]		P01023	96	1230.03	4	-1.3	VSNQTLSLFFTVLQDVPVR	HexNAc5Hex6FucNeuAc2+Cation:K@3	glycopepnew_HCDEThcDiTCIDpeptide_EThcDpd2	67.933	1	20057	20.1	7.4e-08	1	163292	HUMAN	Alpha-2-macroglobulin
[4]		P01023	96	1302.8	4	0.53	VSNQTLSLFFTVLQDVPVR	HexNAc5Hex6FucNeuAc3+Cation:K@3	glycopepnew_HCDEThcDiTCIDpeptide_EThcDpd2	78.233	2	23363	20.5	2.1e-06	1	163292	HUMAN	Alpha-2-macroglobulin
[4]		P01023	96	1184.03	4	0.75	VSNQTLSLFFTVLQDVPVR	HexNAc5Hex6NeuAc2@3	glycopepnew_HCDEThcDiTCIDpeptide_EThcDpd2	67.017	1	19764	42.6	4.5e-11	1	163292	HUMAN	Alpha-2-macroglobulin
[4]		P01023	96	1266.29	4	-1.6	VSNQTLSLFFTVLQDVPVR	HexNAc5Hex6NeuAc3+Cation:K@3	glycopepnew_HCDEThcDiTCIDpeptide_EThcDpd2	78.7	2	23506	38.1	2.7e-11	1	163292	HUMAN	Alpha-2-macroglobulin
[4]		P01023	96	1252.53	4	-2.7	VSNQTLSLFFTVLQDVPVR	HexNAc6Hex8NeuAc+Cation:K@3	glycopepnew_HCDEThcDiTCIDpeptide_EThcDpd2	66.85	2	19713	25.2	1.5e-10	1	163292	HUMAN	Alpha-2-macroglobulin
[33]		P05543	4	971.153	4	3.3	VTACHSSQPNATLYK	HexNAc4Hex5NeuAc2@10	glycopepnew_HCDEThcDiTCIDpeptide_EThcDpd2	19.85	1	4264	47.8	3.7e-12	1	46324.9	HUMAN	Thyroxine-binding globulin
[33]		P05543	4	980.636	4	-3.5	VTACHSSQPNATLYK	HexNAc4Hex5NeuAc2+Cation:K@10	glycopepnew_HCDEThcDiTCIDpeptide_EThcDpd2	19.967	1	4304	40.5	6.8e-15	1	46324.9	HUMAN	Thyroxine-binding globulin
[12]		P08185	24	1109.26	5	1.2	VTISGVYDLGDVLEEMGIADLFTNQAN	HexNAc5Hex9Fuc+Cation:K@27	glycopepnew_HCDEThcDiTCIDpeptide_EThcDpd2	79.283	1	23695	13	4.9e-06	1	45141.3	HUMAN	Corticosteroid-binding globulin
[12]		P08185	24	1380.08	4	-1.2	VTISGVYDLGDVLEEMGIADLFTNQANFSR	HexNAc2Hex11+Cation:K&Oxidation@(27&16)||HexNAc4Hex4FucNeuAc2+Cation:K&Oxidation@(27&16)||HexNAc4Hex5NeuAc2+Cation:K@27	glycopepnew_HCDEThcDiTCIDpeptide_EThcDpd2	79.25	2	23685	35.3	1.1e-11	1	45141.3	HUMAN	Corticosteroid-binding globulin
[12]		P08185	24	1104.47	5	-1.2	VTISGVYDLGDVLEEMGIADLFTNQANFSR	HexNAc4Hex5Fuc2NeuAc+Cation:K@27=22	glycopepnew_HCDEThcDiTCIDpeptide_EThcDpd2	79.067	1	23623	27.6	1.1e-10	1	45141.3	HUMAN	Corticosteroid-binding globulin
[12]		P08185	24	1370.59	4	-3.4	VTISGVYDLGDVLEEMGIADLFTNQANFSR	HexNAc4Hex5NeuAc2@27=16	glycopepnew_HCDEThcDiTCIDpeptide_EThcDpd2	78.9	1	23570	34.4	1.6e-10	1	45141.3	HUMAN	Corticosteroid-binding globulin
[12]		P08185	24	1376.59	4	2.3	VTISGVYDLGDVLEEMGIADLFTNQANFSR	HexNAc6Hex5Fuc+Cation:K&Oxidation@(27&16)||HexNAc6Hex6+Cation:K@27	glycopepnew_HCDEThcDiTCIDpeptide_EThcDpd2	79.033	1	23612	33.8	6.6e-09	1	45141.3	HUMAN	Corticosteroid-binding globulin
[3]		P00738	120	1115.19	3	0.41	VVLHPNYSQVDIGLIK	HexNAc3Hex4NeuAc@6	glycopepnew_HCDEThcDiTCIDpeptide_EThcDpd2	39.667	2	10877	29.4	1.7e-09	1	45205.7	HUMAN	Haptoglobin
[3]		P00738	120	933.423	4	5.8	VVLHPNYSQVDIGLIK	HexNAc4Hex4FucNeuAc+Cation:K@6	glycopepnew_HCDEThcDiTCIDpeptide_EThcDpd2	35.233	1	9362	56.5	1.3e-12	1	45205.7	HUMAN	Haptoglobin
[3]		P00738	120	1006.2	4	3.5	VVLHPNYSQVDIGLIK	HexNAc4Hex4FucNeuAc2+Cation:K@6	glycopepnew_HCDEThcDiTCIDpeptide_EThcDpd2	39.65	1	10870	70.7	2.8e-13	1	45205.7	HUMAN	Haptoglobin
[3]		P00738	120	855.154	4	0.95	VVLHPNYSQVDIGLIK	HexNAc4Hex5@6	glycopepnew_HCDEThcDiTCIDpeptide_EThcDpd2	31.3	1	8055	39	1.3e-10	1	45205.7	HUMAN	Haptoglobin
[3]		P00738	120	927.929	4	1.6	VVLHPNYSQVDIGLIK	HexNAc4Hex5NeuAc@6	glycopepnew_HCDEThcDiTCIDpeptide_EThcDpd2	35.133	2	9336	53.4	2.4e-10	1	45205.7	HUMAN	Haptoglobin
[3]		P00738	120	750.134	5	-1.6	VVLHPNYSQVDIGLIK	HexNAc4Hex5NeuAc+Cation:K@6	glycopepnew_HCDEThcDiTCIDpeptide_EThcDpd2	35.217	1	9355	51	3.8e-18	1	45205.7	HUMAN	Haptoglobin
[3]		P00738	120	1000.7	4	1.3	VVLHPNYSQVDIGLIK	HexNAc4Hex5NeuAc2@6	glycopepnew_HCDEThcDiTCIDpeptide_EThcDpd2	39.583	2	10846	60.7	6.9e-12	1	45205.7	HUMAN	Haptoglobin
[3]		P00738	120	808.352	5	-1.5	VVLHPNYSQVDIGLIK	HexNAc4Hex5NeuAc2+Cation:K@6	glycopepnew_HCDEThcDiTCIDpeptide_EThcDpd2	39.7	1	10885	61.6	3.2e-21	1	45205.7	HUMAN	Haptoglobin
[3]		P00738	120	1201.27	4	-2.7	VVLHPNYSQVDIGLIK	HexNAc5Hex6FucNeuAc3@6	glycopepnew_HCDEThcDiTCIDpeptide_EThcDpd2	44.7	2	12591	33.9	1e-07	1	45205.7	HUMAN	Haptoglobin
[3]		P00738	120	1210.76	4	-0.61	VVLHPNYSQVDIGLIK	HexNAc5Hex6FucNeuAc3+Cation:K@6	glycopepnew_HCDEThcDiTCIDpeptide_EThcDpd2	44.883	1	12649	31.7	2.4e-07	1	45205.7	HUMAN	Haptoglobin
[3]		P00738	120	823.161	5	-0.17	VVLHPNYSQVDIGLIK	HexNAc5Hex6NeuAc+Cation:K@6	glycopepnew_HCDEThcDiTCIDpeptide_EThcDpd2	34.867	1	9242	57.6	2.2e-19	1	45205.7	HUMAN	Haptoglobin
[3]		P00738	120	1091.98	4	0.29	VVLHPNYSQVDIGLIK	HexNAc5Hex6NeuAc2@6	glycopepnew_HCDEThcDiTCIDpeptide_EThcDpd2	39.283	1	10736	54.2	1.1e-09	1	45205.7	HUMAN	Haptoglobin
[3]		P00738	120	1101.47	4	-2.2	VVLHPNYSQVDIGLIK	HexNAc5Hex6NeuAc2+Cation:K@6	glycopepnew_HCDEThcDiTCIDpeptide_EThcDpd2	39.333	1	10757	57.2	2.4e-09	1	45205.7	HUMAN	Haptoglobin
[3]		P00738	120	1164.76	4	1.4	VVLHPNYSQVDIGLIK	HexNAc5Hex6NeuAc3@6	glycopepnew_HCDEThcDiTCIDpeptide_EThcDpd2	44.767	3	12611	45.2	1.1e-10	1	45205.7	HUMAN	Haptoglobin
[3]		P00738	120	1174.25	4	-0.78	VVLHPNYSQVDIGLIK	HexNAc5Hex6NeuAc3+Cation:K@6	glycopepnew_HCDEThcDiTCIDpeptide_EThcDpd2	44.767	4	12616	43.6	4.1e-07	1	45205.7	HUMAN	Haptoglobin
[3]		P00738	120	1256.04	4	1	VVLHPNYSQVDIGLIK	HexNAc6Hex7NeuAc3@6	glycopepnew_HCDEThcDiTCIDpeptide_EThcDpd2	44.617	2	12564	33.4	9.4e-07	1	45205.7	HUMAN	Haptoglobin
[14]		P01019	14	1113	4	1.5	VYIHPFHLVIHNESTCEQLAK	HexNAc4Hex5NeuAc@12	glycopepnew_HCDEThcDiTCIDpeptide_EThcDpd2	26.8	1	6584	45.7	9.3e-17	1	53154.7	HUMAN	Angiotensinogen
[14]		P01019	14	948.82	5	3.8	VYIHPFHLVIHNESTCEQLAK	HexNAc4Hex5NeuAc2@12	glycopepnew_HCDEThcDiTCIDpeptide_EThcDpd2	29.833	2	7554	62.2	7.5e-19	1	53154.7	HUMAN	Angiotensinogen
[35]		P02749	3	965.138	4	-2.6	VYKPSAGNNSLYR	HexNAc2Hex12+Cation:K@8||HexNAc4Hex5FucNeuAc2+Cation:K@8	glycopepnew_HCDEThcDiTCIDpeptide_EThcDpd2	21.717	2	4915	43.1	1.1e-17	1	38298.6	HUMAN	Beta-2-glycoprotein 1
[35]		P02749	3	955.653	4	1.4	VYKPSAGNNSLYR	HexNAc4Hex5FucNeuAc2@8	glycopepnew_HCDEThcDiTCIDpeptide_EThcDpd2	21.717	1	4913	39.3	2.4e-14	1	38298.6	HUMAN	Beta-2-glycoprotein 1
[3]		P00738	120	1163.28	4	-4.2	WQAKMVSHHNLTTGATLINEQWLLTTAK	HexNAc3Hex4Fuc+Cation:K&Oxidation@(10&(1|5))||HexNAc3Hex5+Cation:K@10	glycopepnew_HCDEThcDiTCIDpeptide_EThcDpd2	31.75	2	8200	57.2	2.4e-16	1	45205.7	HUMAN	Haptoglobin
[21]		P43652	10	1084.67	4	0.77	YAEDKFNETTEK	HexNAc5Hex6NeuAc3@7	glycopepnew_HCDEThcDiTCIDpeptide_EThcDpd2	24.033	2	5682	38.5	2.3e-10	1	69069.8	HUMAN	Afamin
[13]		P01871	15	759.043	4	-7.7	YKNNSDISSTR	HexNAc3Hex5NeuAc+Cation:K@3	glycopepnew_HCDEThcDiTCIDpeptide_EThcDpd2	23.167	1	5386	12.2	7.6e-05	1	49440.2	HUMAN	Immunoglobulin heavy constant mu
[13]		P01871	15	677.266	5	-2.6	YKNNSDISSTR	HexNAc4Hex5FucNeuAc+Cation:K@3	glycopepnew_HCDEThcDiTCIDpeptide_EThcDpd2	14.533	2	2395	48	1.6e-17	1	49440.2	HUMAN	Immunoglobulin heavy constant mu
[13]		P01871	15	717.881	5	-2.7	YKNNSDISSTR	HexNAc5Hex5FucNeuAc+Cation:K@3	glycopepnew_HCDEThcDiTCIDpeptide_EThcDpd2	14.6	1	2418	56.8	1.3e-24	1	49440.2	HUMAN	Immunoglobulin heavy constant mu
[1]		P01009	159	1102.15	3	-0.15	YLGNATAIFFLPDEGK	HexNAc3Hex4NeuAc@4	glycopepnew_HCDEThcDiTCIDpeptide_EThcDpd2	55.333	1	16054	37.8	9.8e-14	1	46736.9	HUMAN	Alpha-1-antitrypsin
[1]		P01009	159	996.419	4	6.1	YLGNATAIFFLPDEGK	HexNAc4Hex4FucNeuAc2+Cation:K@4	glycopepnew_HCDEThcDiTCIDpeptide_EThcDpd2	55.317	2	16046	66.6	9.6e-21	1	46736.9	HUMAN	Alpha-1-antitrypsin
[1]		P01009	159	1027.44	4	1.1	YLGNATAIFFLPDEGK	HexNAc4Hex5FucNeuAc2@4	glycopepnew_HCDEThcDiTCIDpeptide_EThcDpd2	55.7	2	16160	24.4	8.4e-10	1	46736.9	HUMAN	Alpha-1-antitrypsin
[1]		P01009	159	918.146	4	-2.8	YLGNATAIFFLPDEGK	HexNAc4Hex5NeuAc@4	glycopepnew_HCDEThcDiTCIDpeptide_EThcDpd2	47.65	2	13565	51.3	4e-15	1	46736.9	HUMAN	Alpha-1-antitrypsin
[1]		P01009	159	927.637	4	-0.76	YLGNATAIFFLPDEGK	HexNAc4Hex5NeuAc+Cation:K@4	glycopepnew_HCDEThcDiTCIDpeptide_EThcDpd2	47.667	1	13571	68.7	3.4e-22	1	46736.9	HUMAN	Alpha-1-antitrypsin
[1]		P01009	159	990.924	4	1.4	YLGNATAIFFLPDEGK	HexNAc4Hex5NeuAc2@4	glycopepnew_HCDEThcDiTCIDpeptide_EThcDpd2	55.317	1	16044	60.5	1.1e-18	1	46736.9	HUMAN	Alpha-1-antitrypsin
[1]		P01009	159	1000.41	4	-0.51	YLGNATAIFFLPDEGK	HexNAc4Hex5NeuAc2+Cation:K@4	glycopepnew_HCDEThcDiTCIDpeptide_EThcDpd2	56.883	2	16545	70.5	2.7e-25	1	46736.9	HUMAN	Alpha-1-antitrypsin
[1]		P01009	159	1091.7	4	1.2	YLGNATAIFFLPDEGK	HexNAc5Hex6NeuAc2+Cation:K@4	glycopepnew_HCDEThcDiTCIDpeptide_EThcDpd2	55.083	2	15972	30.2	5e-09	1	46736.9	HUMAN	Alpha-1-antitrypsin
[1]		P01009	159	1164.47	4	-2.1	YLGNATAIFFLPDEGK	HexNAc5Hex6NeuAc3+Cation:K@4	glycopepnew_HCDEThcDiTCIDpeptide_EThcDpd2	66.05	1	19464	49.5	1.7e-17	1	46736.9	HUMAN	Alpha-1-antitrypsin
[4]		P01023	96	1166.74	4	-7.4	YLNETVTVSASLESVR	HexNAc5Hex8Fuc4@3	glycopepnew_HCDEThcDiTCIDpeptide_EThcDpd2	69.167	1	20452	20.5	2.9e-06	1	163292	HUMAN	Alpha-2-macroglobulin
[18]		P00734	12	988.41	5	5	YPHKPEINSTTHPGADLQENFCR	HexNAc4Hex4FucNeuAc2+Cation:K@8	glycopepnew_HCDEThcDiTCIDpeptide_EThcDpd2	24.95	1	5988	44.2	7.8e-15	1	70037.5	HUMAN	Prothrombin
[18]		P00734	12	925.795	5	1.3	YPHKPEINSTTHPGADLQENFCR	HexNAc4Hex5NeuAc@8	glycopepnew_HCDEThcDiTCIDpeptide_EThcDpd2	22.6	1	5201	75.2	2.5e-21	1	70037.5	HUMAN	Prothrombin
[18]		P00734	12	991.602	5	-2.3	YPHKPEINSTTHPGADLQENFCR	HexNAc4Hex5NeuAc2+Cation:K@8	glycopepnew_HCDEThcDiTCIDpeptide_EThcDpd2	24.95	2	5990	70	9.1e-32	1	70037.5	HUMAN	Prothrombin
[11]		P01011	24	1318.28	4	-2	YTGNASALFILPDQDK	HexNAc6Hex7NeuAc4@4	glycopepnew_HCDEThcDiTCIDpeptide_EThcDpd2	78.5	1	23447	18.7	1e-07	1	47651.3	HUMAN	Alpha-1-antichymotrypsin
[11]		P01011	24	1327.77	4	-1.2	YTGNASALFILPDQDK	HexNAc6Hex7NeuAc4+Cation:K@4	glycopepnew_HCDEThcDiTCIDpeptide_EThcDpd2	79.2	1	23667	21.6	5.2e-08	1	47651.3	HUMAN	Alpha-1-antichymotrypsin

## Sheet: Peptides_Searched
NB: Only the MS-Filter search ending _CationK considered the Cation-K C-terminal adducts, but all considered the adduct to the glycan
DB Peptide
AALAAFNAQNNGSNFQLEEISR
AALAAFNAQNNGSNFQLEEISR -Cation:K
ADTHDEILEGLNFNL
ADTHDEILEGLNFNL -Cation:K
ADTHDEILEGLNFNLTEI
ADTHDEILEGLNFNLTEI -Cation:K
ADTHDEILEGLNFNLTEIP
ADTHDEILEGLNFNLTEIP -Cation:K
ADTHDEILEGLNFNLTEIPEAQIH
ADTHDEILEGLNFNLTEIPEAQIH -Cation:K
ADTHDEILEGLNFNLTEIPEAQIHEG
ADTHDEILEGLNFNLTEIPEAQIHEG -Cation:K
ADTHDEILEGLNFNLTEIPEAQIHEGF
ADTHDEILEGLNFNLTEIPEAQIHEGF -Cation:K
ADTHDEILEGLNFNLTEIPEAQIHEGFQEL
ADTHDEILEGLNFNLTEIPEAQIHEGFQEL -Cation:K
ADTHDEILEGLNFNLTEIPEAQIHEGFQELL
ADTHDEILEGLNFNLTEIPEAQIHEGFQELL -Cation:K
ADTHDEILEGLNFNLTEIPEAQIHEGFQELLR
ADTHDEILEGLNFNLTEIPEAQIHEGFQELLR -Cation:K
ADTHDEILEGLNFNLTEIPEAQIHEGFQELLRTLN
ADTHDEILEGLNFNLTEIPEAQIHEGFQELLRTLN -Cation:K
ADTHDEILEGLNFNLTEIPEAQIHEGFQELLRTLNQ
ADTHDEILEGLNFNLTEIPEAQIHEGFQELLRTLNQ -Cation:K
ADTHDEILEGLNFNLTEIPEAQIHEGFQELLRTLNQPDS
ADTHDEILEGLNFNLTEIPEAQIHEGFQELLRTLNQPDS -Cation:K
ADTHDEILEGLNFNLTEIPEAQIHEGFQELLRTLNQPDSQLQLTTGNGLFLSEGLK
ADTHDEILEGLNFNLTEIPEAQIHEGFQELLRTLNQPDSQLQLTTGNGLFLSEGLK -Cation:K
AFITNFSMIIDGMTYPGIIK
AFITNFSMIIDGMTYPGIIK -Cation:K
AGLQAFFQVQEC(Carbamidomethyl)NK
AGLQAFFQVQEC(Carbamidomethyl)NK -Cation:K
AIFYETQPSLWAESESLLKPLANVTLTC(Carbamidomethyl)QAHLETPDFQLFK
AIFYETQPSLWAESESLLKPLANVTLTC(Carbamidomethyl)QAHLETPDFQLFK -Cation:K
AKMVSHHNLTTGATLINEQWLLTTAK
AKMVSHHNLTTGATLINEQWLLTTAK -Cation:K
ALEDLLLGSEANLTC(Carbamidomethyl)TLTGLR
ALEDLLLGSEANLTC(Carbamidomethyl)TLTGLR -Cation:K
ALPQPQNVTSLLGC(Carbamidomethyl)TH
ALPQPQNVTSLLGC(Carbamidomethyl)TH -Cation:K
ANLSSQALQMSLDYGFVTPLTSMSIR
ANLSSQALQMSLDYGFVTPLTSMSIR -Cation:K
AQLLQGLGFNLTER
AQLLQGLGFNLTER -Cation:K
AVLQLNEEGVDTAGSTGVTLNLTSKPIILR
AVLQLNEEGVDTAGSTGVTLNLTSKPIILR -Cation:K
C(Carbamidomethyl)ANLVPVPITNATLDQITGK
C(Carbamidomethyl)ANLVPVPITNATLDQITGK -Cation:K
C(Carbamidomethyl)ANLVPVPITNATLDR
C(Carbamidomethyl)ANLVPVPITNATLDR -Cation:K
C(Carbamidomethyl)ENLTTGK
C(Carbamidomethyl)ENLTTGK -Cation:K
C(Carbamidomethyl)GLVPVLAENYNK
C(Carbamidomethyl)GLVPVLAENYNK -Cation:K
C(Carbamidomethyl)GLVPVLAENYNKS
C(Carbamidomethyl)GLVPVLAENYNKS -Cation:K
C(Carbamidomethyl)GLVPVLAENYNKSD
C(Carbamidomethyl)GLVPVLAENYNKSD -Cation:K
C(Carbamidomethyl)GLVPVLAENYNKSDN
C(Carbamidomethyl)GLVPVLAENYNKSDN -Cation:K
C(Carbamidomethyl)GLVPVLAENYNKSDNC(Carbamidomethyl)EDTPEAGYFAIAVVK
C(Carbamidomethyl)GLVPVLAENYNKSDNC(Carbamidomethyl)EDTPEAGYFAIAVVK -Cation:K
C(Carbamidomethyl)SDGWSFDATTLDDN
C(Carbamidomethyl)SDGWSFDATTLDDN -Cation:K
C(Carbamidomethyl)SDGWSFDATTLDDNGT
C(Carbamidomethyl)SDGWSFDATTLDDNGT -Cation:K
C(Carbamidomethyl)SDGWSFDATTLDDNGTM
C(Carbamidomethyl)SDGWSFDATTLDDNGTM -Cation:K
C(Carbamidomethyl)SDGWSFDATTLDDNGTMLFFK
C(Carbamidomethyl)SDGWSFDATTLDDNGTMLFFK -Cation:K
C(Carbamidomethyl)SDGWSFDATTLDDNGTMLFFKGE
C(Carbamidomethyl)SDGWSFDATTLDDNGTMLFFKGE -Cation:K
DEATKWNVNAPPTFHSEMMYDNFTLVPVWGK
DEATKWNVNAPPTFHSEMMYDNFTLVPVWGK -Cation:K
DIENFNSTQK
DIENFNSTQK -Cation:K
DIVEYYNDSNGSHVLQGR
DIVEYYNDSNGSHVLQGR -Cation:K
DKIC(Carbamidomethyl)DLLVANNHFAHFFAPQNLTNMNK
DKIC(Carbamidomethyl)DLLVANNHFAHFFAPQNLTNMNK -Cation:K
DTHDEILEGLNFNLTEIPEAQIHEGFQELLR
DTHDEILEGLNFNLTEIPEAQIHEGFQELLR -Cation:K
DVQIIVFPEDGIHGFNFTR
DVQIIVFPEDGIHGFNFTR -Cation:K
EEQFNSTFR
EEQFNSTFR -Cation:K
EEQFNSTYR
EEQFNSTYR -Cation:K
EEQYNSTYR
EEQYNSTYR -Cation:K
EGDHEFLEVPEAQEDVEATFPVHQPGNYSC(Carbamidomethyl)SYR
EGDHEFLEVPEAQEDVEATFPVHQPGNYSC(Carbamidomethyl)SYR -Cation:K
EGDHEFLEVPEAQEDVEATFPVHQPGNYSC(Carbamidomethyl)SYRTD
EGDHEFLEVPEAQEDVEATFPVHQPGNYSC(Carbamidomethyl)SYRTD -Cation:K
EGDHEFLEVPEAQEDVEATFPVHQPGNYSC(Carbamidomethyl)SYRTDGEGAL
EGDHEFLEVPEAQEDVEATFPVHQPGNYSC(Carbamidomethyl)SYRTDGEGAL -Cation:K
EHEGAIYPDNTTDFQR
EHEGAIYPDNTTDFQR -Cation:K
ELHHLQEQNVSNAFLDK
ELHHLQEQNVSNAFLDK -Cation:K
ENGTISR
ENGTISR -Cation:K
ENGTVSR
ENGTVSR -Cation:K
ENISDPTSPLR
ENISDPTSPLR -Cation:K
ENLTAPGSDSAVFFEQGTTR
ENLTAPGSDSAVFFEQGTTR -Cation:K
EVFVHPNYSK
EVFVHPNYSK -Cation:K
FAMLSLGTKADTHDEILEGLNFNLTEIPEAQIHEGFQELLR
FAMLSLGTKADTHDEILEGLNFNLTEIPEAQIHEGFQELLR -Cation:K
FGC(Carbamidomethyl)EIENNR
FGC(Carbamidomethyl)EIENNR -Cation:K
FGSNVTDC(Carbamidomethyl)SGNFC(Carbamidomethyl)LFR
FGSNVTDC(Carbamidomethyl)SGNFC(Carbamidomethyl)LFR -Cation:K
FLNNGTC(Carbamidomethyl)TAEGK
FLNNGTC(Carbamidomethyl)TAEGK -Cation:K
FNETTEK
FNETTEK -Cation:K
FNLTEIPEAQIHEGFQELLR
FNLTEIPEAQIHEGFQELLR -Cation:K
FNLTETSEAEIHQSFQHLLR
FNLTETSEAEIHQSFQHLLR -Cation:K
FQSPAGTEALFELHNISVADSANYSC(Carbamidomethyl)VYVDLKPPFGGSAPSER
FQSPAGTEALFELHNISVADSANYSC(Carbamidomethyl)VYVDLKPPFGGSAPSER -Cation:K
FQSPAGTEALFELHNISVADSANYSC(Carbamidomethyl)VYVDLKPPFGGSAPSERL
FQSPAGTEALFELHNISVADSANYSC(Carbamidomethyl)VYVDLKPPFGGSAPSERL -Cation:K
FQVQEC(Carbamidomethyl)NK
FQVQEC(Carbamidomethyl)NK -Cation:K
FSDGLESNSSTQFEVK
FSDGLESNSSTQFEVK -Cation:K
FSPLSISTALAFLSLGAHNTTLTEILK
FSPLSISTALAFLSLGAHNTTLTEILK -Cation:K
GC(Carbamidomethyl)VLLSYLNETVTVSASL
GC(Carbamidomethyl)VLLSYLNETVTVSASL -Cation:K
GC(Carbamidomethyl)VLLSYLNETVTVSASLE
GC(Carbamidomethyl)VLLSYLNETVTVSASLE -Cation:K
GC(Carbamidomethyl)VLLSYLNETVTVSASLESVR
GC(Carbamidomethyl)VLLSYLNETVTVSASLESVR -Cation:K
GDVLHNGNGTYQSWVVVAVPPQDTAPYSC(Carbamidomethyl)HVQH
GDVLHNGNGTYQSWVVVAVPPQDTAPYSC(Carbamidomethyl)HVQH -Cation:K
GDVLHNGNGTYQSWVVVAVPPQDTAPYSC(Carbamidomethyl)HVQHSSLAQ
GDVLHNGNGTYQSWVVVAVPPQDTAPYSC(Carbamidomethyl)HVQHSSLAQ -Cation:K
GDVLHNGNGTYQSWVVVAVPPQDTAPYSC(Carbamidomethyl)HVQHSSLAQPLVVPWEAS
GDVLHNGNGTYQSWVVVAVPPQDTAPYSC(Carbamidomethyl)HVQHSSLAQPLVVPWEAS -Cation:K
GFGVAIVGNYTAALPTEAALR
GFGVAIVGNYTAALPTEAALR -Cation:K
GHGHRNGTGHGNSTHHGPEYMR
GHGHRNGTGHGNSTHHGPEYMR -Cation:K
GHGNSTHHGPEYMR
GHGNSTHHGPEYMR -Cation:K
GHRNGTGHGNSTHHGPEYMR
GHRNGTGHGNSTHHGPEYMR -Cation:K
GLNFNLTEIPEAQIHEGFQELLR
GLNFNLTEIPEAQIHEGFQELLR -Cation:K
GLNVTLSSTGR
GLNVTLSSTGR -Cation:K
GLTFQQNASSMC(Carbamidomethyl)VPDQDTAIR
GLTFQQNASSMC(Carbamidomethyl)VPDQDTAIR -Cation:K
GSFPWQAKMVSHHNLTTGATLINEQWLLTTAK
GSFPWQAKMVSHHNLTTGATLINEQWLLTTAK -Cation:K
GSNVTDC(Carbamidomethyl)SGNFC(Carbamidomethyl)LFR
GSNVTDC(Carbamidomethyl)SGNFC(Carbamidomethyl)LFR -Cation:K
HGIQYFNNNTQHSSLFMLNEVK
HGIQYFNNNTQHSSLFMLNEVK -Cation:K
HLQMDIHIFEPQGISFLETESTFMTNQLVDALTTWQN
HLQMDIHIFEPQGISFLETESTFMTNQLVDALTTWQN -Cation:K
HLVIHNESTC(Carbamidomethyl)EQLAK
HLVIHNESTC(Carbamidomethyl)EQLAK -Cation:K
HNLTTGATLINEQWLLTTAK
HNLTTGATLINEQWLLTTAK -Cation:K
HPNYSQVDIGLIK
HPNYSQVDIGLIK -Cation:K
HPRLSLHRPALEDLLLGSEANLTC(Carbamidomethyl)TLTGLR
HPRLSLHRPALEDLLLGSEANLTC(Carbamidomethyl)TLTGLR -Cation:K
HRPALEDLLLGSEANLTC(Carbamidomethyl)TLTGLR
HRPALEDLLLGSEANLTC(Carbamidomethyl)TLTGLR -Cation:K
HYLMWGLSSDFWGEKPNLSY
HYLMWGLSSDFWGEKPNLSY -Cation:K
HYLMWGLSSDFWGEKPNLSYIIGKDTWVEHW
HYLMWGLSSDFWGEKPNLSYIIGKDTWVEHW -Cation:K
HYLMWGLSSDFWGEKPNLSYIIGKDTWVEHWP
HYLMWGLSSDFWGEKPNLSYIIGKDTWVEHWP -Cation:K
HYTNSSQDVTVPC(Carbamidomethyl)R
HYTNSSQDVTVPC(Carbamidomethyl)R -Cation:K
HYTNSSQDVTVPC(Carbamidomethyl)RVPPPPPC(Carbamidomethyl)C(Carbamidomethyl)HPR
HYTNSSQDVTVPC(Carbamidomethyl)RVPPPPPC(Carbamidomethyl)C(Carbamidomethyl)HPR -Cation:K
IC(Carbamidomethyl)DLLVANNHFAHFFAPQNLTNMNK
IC(Carbamidomethyl)DLLVANNHFAHFFAPQNLTNMNK -Cation:K
IEKVVLHPNYSQVDIGLIK
IEKVVLHPNYSQVDIGLIK -Cation:K
IFEPQGISFLETESTFMTNQLVDALTTWQNK
IFEPQGISFLETESTFMTNQLVDALTTWQNK -Cation:K
IITILEEEMNVSVC(Carbamidomethyl)GLYTYGK
IITILEEEMNVSVC(Carbamidomethyl)GLYTYGK -Cation:K
IITILEEEMNVSVC(Carbamidomethyl)GLYTYGKPVPGHVTVSIC(Carbamidomethyl)R
IITILEEEMNVSVC(Carbamidomethyl)GLYTYGKPVPGHVTVSIC(Carbamidomethyl)R -Cation:K
IIVPLNNRENISDPTSPLR
IIVPLNNRENISDPTSPLR -Cation:K
IMNGEADAMSLDGGFVYIAGKC(Carbamidomethyl)GLVPVLAENYNK
IMNGEADAMSLDGGFVYIAGKC(Carbamidomethyl)GLVPVLAENYNK -Cation:K
KADTHDEILEGLNFNLTEIPEAQIHEGFQELLR
KADTHDEILEGLNFNLTEIPEAQIHEGFQELLR -Cation:K
KC(Carbamidomethyl)GLVPVLAENYNK
KC(Carbamidomethyl)GLVPVLAENYNK -Cation:K
KLGAC(Carbamidomethyl)NDTLQQLMEVFK
KLGAC(Carbamidomethyl)NDTLQQLMEVFK -Cation:K
KLHINHNNLTESVGPLPK
KLHINHNNLTESVGPLPK -Cation:K
KVSNQTLSLFFTVLQDVPVR
KVSNQTLSLFFTVLQDVPVR -Cation:K
KVVLHPNYSQVDIGLIK
KVVLHPNYSQVDIGLIK -Cation:K
KYLGNATAIFFLPDEGK
KYLGNATAIFFLPDEGK -Cation:K
LAGKPTHVNVS
LAGKPTHVNVS -Cation:K
LAGKPTHVNVSV
LAGKPTHVNVSV -Cation:K
LAGKPTHVNVSVVM
LAGKPTHVNVSVVM -Cation:K
LAGKPTHVNVSVVMA
LAGKPTHVNVSVVMA -Cation:K
LAGKPTHVNVSVVMAEVDGT
LAGKPTHVNVSVVMAEVDGT -Cation:K
LAGKPTHVNVSVVMAEVDGTC(Carbamidomethyl)
LAGKPTHVNVSVVMAEVDGTC(Carbamidomethyl) -Cation:K
LAGKPTHVNVSVVMAEVDGTC(Carbamidomethyl)Y
LAGKPTHVNVSVVMAEVDGTC(Carbamidomethyl)Y -Cation:K
LDKVSNQTLSLFFTVLQDVPVR
LDKVSNQTLSLFFTVLQDVPVR -Cation:K
LEDLLLGSEANLTC(Carbamidomethyl)TLTGLR
LEDLLLGSEANLTC(Carbamidomethyl)TLTGLR -Cation:K
LEGLNFNLTEIPEAQIHEGFQELLR
LEGLNFNLTEIPEAQIHEGFQELLR -Cation:K
LEPVHLQLQC(Carbamidomethyl)MSQEQLAQVAANATK
LEPVHLQLQC(Carbamidomethyl)MSQEQLAQVAANATK -Cation:K
LFGSNVTDC(Carbamidomethyl)SGNFC(Carbamidomethyl)LFR
LFGSNVTDC(Carbamidomethyl)SGNFC(Carbamidomethyl)LFR -Cation:K
LGAC(Carbamidomethyl)NDTLQQLMEVFK
LGAC(Carbamidomethyl)NDTLQQLMEVFK -Cation:K
LGNATAIFFLPDEGK
LGNATAIFFLPDEGK -Cation:K
LHINHNNLTESVGPLPK
LHINHNNLTESVGPLPK -Cation:K
LHINHNNLTESVGPLPKS
LHINHNNLTESVGPLPKS -Cation:K
LHPNYSQVDIGLIK
LHPNYSQVDIGLIK -Cation:K
LNHSENATAK
LNHSENATAK -Cation:K
LQAPLNYTEFQKPIC(Carbamidomethyl)LPSK
LQAPLNYTEFQKPIC(Carbamidomethyl)LPSK -Cation:K
LSISTALAFLSLGAHNTTLTEILK
LSISTALAFLSLGAHNTTLTEILK -Cation:K
LSLHRPALEDLLLGSEANLT
LSLHRPALEDLLLGSEANLT -Cation:K
LSLHRPALEDLLLGSEANLTC(Carbamidomethyl)TLT
LSLHRPALEDLLLGSEANLTC(Carbamidomethyl)TLT -Cation:K
LSLHRPALEDLLLGSEANLTC(Carbamidomethyl)TLTGLR
LSLHRPALEDLLLGSEANLTC(Carbamidomethyl)TLTGLR -Cation:K
LSLHRPALEDLLLGSEANLTC(Carbamidomethyl)TLTGLRD
LSLHRPALEDLLLGSEANLTC(Carbamidomethyl)TLTGLRD -Cation:K
LSLHRPALEDLLLGSEANLTC(Carbamidomethyl)TLTGLRDA
LSLHRPALEDLLLGSEANLTC(Carbamidomethyl)TLTGLRDA -Cation:K
LSLHRPALEDLLLGSEANLTC(Carbamidomethyl)TLTGLRDASGATFTWTP
LSLHRPALEDLLLGSEANLTC(Carbamidomethyl)TLTGLRDASGATFTWTP -Cation:K
LSYLNETVTVSASLESVR
LSYLNETVTVSASLESVR -Cation:K
LVPVPITNATLDQITGK
LVPVPITNATLDQITGK -Cation:K
LVPVPITNATLDR
LVPVPITNATLDR -Cation:K
LYHFLLGAWSLNATELDPC(Carbamidomethyl)PLSPELLGLTK
LYHFLLGAWSLNATELDPC(Carbamidomethyl)PLSPELLGLTK -Cation:K
MDPNAAYVNMSNHHR
MDPNAAYVNMSNHHR -Cation:K
MLQSSTISYLHDSELPC(Carbamidomethyl)QLVQMNYVGNGTVFFILPDK
MLQSSTISYLHDSELPC(Carbamidomethyl)QLVQMNYVGNGTVFFILPDK -Cation:K
MPSQAPTGNFYPQPLLNSSMC(Carbamidomethyl)LEDSR
MPSQAPTGNFYPQPLLNSSMC(Carbamidomethyl)LEDSR -Cation:K
MVLFAPNIYVLDYLNETQQLTPEIK
MVLFAPNIYVLDYLNETQQLTPEIK -Cation:K
MVSHHNLTTGATLINEQWLLT
MVSHHNLTTGATLINEQWLLT -Cation:K
MVSHHNLTTGATLINEQWLLTTAK
MVSHHNLTTGATLINEQWLLTTAK -Cation:K
NAQNNGSNFQLEEISR
NAQNNGSNFQLEEISR -Cation:K
NEEYNK
NEEYNK -Cation:K
NETYQDISELVYGAK
NETYQDISELVYGAK -Cation:K
NFTENDLLVR
NFTENDLLVR -Cation:K
NGTGHGNSTHHGPEYMR
NGTGHGNSTHHGPEYMR -Cation:K
NHSC(Carbamidomethyl)SEGQISIFR
NHSC(Carbamidomethyl)SEGQISIFR -Cation:K
NISDGFDGIPDNVDAALALPAHSYSGR
NISDGFDGIPDNVDAALALPAHSYSGR -Cation:K
NLFLNHSENATAK
NLFLNHSENATAK -Cation:K
NLSMPLLPADFHK
NLSMPLLPADFHK -Cation:K
NLTEIPEAQIHEGFQELLR
NLTEIPEAQIHEGFQELLR -Cation:K
NLTETSEAEIHQSFQHLLR
NLTETSEAEIHQSFQHLLR -Cation:K
NLTTGATLINEQWLLTTAK
NLTTGATLINEQWLLTTAK -Cation:K
NPNATSSSSQDPESLQDRGEGK
NPNATSSSSQDPESLQDRGEGK -Cation:K
NQTLSLFFTVLQDVPVR
NQTLSLFFTVLQDVPVR -Cation:K
NSTNIFFSPVSIATAFAMLSLGTK
NSTNIFFSPVSIATAFAMLSLGTK -Cation:K
NTTYLNVQR
NTTYLNVQR -Cation:K
NVIFSPLSISTALAFLSLGAHN
NVIFSPLSISTALAFLSLGAHN -Cation:K
NVIFSPLSISTALAFLSLGAHNTTLT
NVIFSPLSISTALAFLSLGAHNTTLT -Cation:K
NVIFSPLSISTALAFLSLGAHNTTLTEILK
NVIFSPLSISTALAFLSLGAHNTTLTEILK -Cation:K
PALEDLLLGSEANLTC(Carbamidomethyl)TLTGLR
PALEDLLLGSEANLTC(Carbamidomethyl)TLTGLR -Cation:K
PNYSQVDIGLIK
PNYSQVDIGLIK -Cation:K
PREEQFNSTFR
PREEQFNSTFR -Cation:K
PVPITNATLDQITGK
PVPITNATLDQITGK -Cation:K
PWDKNFTENDLLVR
PWDKNFTENDLLVR -Cation:K
QAKMVSHHNLTTGATLINEQWLLTTAK
QAKMVSHHNLTTGATLINEQWLLTTAK -Cation:K
QC(Carbamidomethyl)IYNTTYLNVQR
QC(Carbamidomethyl)IYNTTYLNVQR -Cation:K
QDQC(Carbamidomethyl)IYNTTYLNVQR
QDQC(Carbamidomethyl)IYNTTYLNVQR -Cation:K
QHLFGSNVTDC(Carbamidomethyl)SGNFC(Carbamidomethyl)LFR
QHLFGSNVTDC(Carbamidomethyl)SGNFC(Carbamidomethyl)LFR -Cation:K
QLAHQSNSTNIFFSPV
QLAHQSNSTNIFFSPV -Cation:K
QLAHQSNSTNIFFSPVSIATAF
QLAHQSNSTNIFFSPVSIATAF -Cation:K
QLAHQSNSTNIFFSPVSIATAFAM
QLAHQSNSTNIFFSPVSIATAFAM -Cation:K
QLAHQSNSTNIFFSPVSIATAFAMLS
QLAHQSNSTNIFFSPVSIATAFAMLS -Cation:K
QLAHQSNSTNIFFSPVSIATAFAMLSLGTK
QLAHQSNSTNIFFSPVSIATAFAMLSLGTK -Cation:K
QNMVLFAPNIYVLDYLNETQQLTPEIK
QNMVLFAPNIYVLDYLNETQQLTPEIK -Cation:K
QNQC(Carbamidomethyl)FYNSSYLNVQR
QNQC(Carbamidomethyl)FYNSSYLNVQR -Cation:K
QQQHLFGSNVTDC(Carbamidomethyl)SG
QQQHLFGSNVTDC(Carbamidomethyl)SG -Cation:K
QQQHLFGSNVTDC(Carbamidomethyl)SGNF
QQQHLFGSNVTDC(Carbamidomethyl)SGNF -Cation:K
QQQHLFGSNVTDC(Carbamidomethyl)SGNFC(Carbamidomethyl)
QQQHLFGSNVTDC(Carbamidomethyl)SGNFC(Carbamidomethyl) -Cation:K
QQQHLFGSNVTDC(Carbamidomethyl)SGNFC(Carbamidomethyl)L
QQQHLFGSNVTDC(Carbamidomethyl)SGNFC(Carbamidomethyl)L -Cation:K
QQQHLFGSNVTDC(Carbamidomethyl)SGNFC(Carbamidomethyl)LF
QQQHLFGSNVTDC(Carbamidomethyl)SGNFC(Carbamidomethyl)LF -Cation:K
QQQHLFGSNVTDC(Carbamidomethyl)SGNFC(Carbamidomethyl)LFR
QQQHLFGSNVTDC(Carbamidomethyl)SGNFC(Carbamidomethyl)LFR -Cation:K
QQQHLFGSNVTDC(Carbamidomethyl)SGNFC(Carbamidomethyl)LFRSE
QQQHLFGSNVTDC(Carbamidomethyl)SGNFC(Carbamidomethyl)LFRSE -Cation:K
QSNSTNIFFSPVSIATAFAMLSLGTK
QSNSTNIFFSPVSIATAFAMLSLGTK -Cation:K
REGDHEFLEVPEAQEDVEATFPVHQPGN
REGDHEFLEVPEAQEDVEATFPVHQPGN -Cation:K
REGDHEFLEVPEAQEDVEATFPVHQPGNYSC(Carbamidomethyl)
REGDHEFLEVPEAQEDVEATFPVHQPGNYSC(Carbamidomethyl) -Cation:K
REGDHEFLEVPEAQEDVEATFPVHQPGNYSC(Carbamidomethyl)SYR
REGDHEFLEVPEAQEDVEATFPVHQPGNYSC(Carbamidomethyl)SYR -Cation:K
RQLAHQSNSTNIFFSPVSIATAFAMLSLGTK
RQLAHQSNSTNIFFSPVSIATAFAMLSLGTK -Cation:K
SEANLTC(Carbamidomethyl)TLTGLR
SEANLTC(Carbamidomethyl)TLTGLR -Cation:K
SFPWQAKMVSHHNLTTGATLINEQWLLTTAK
SFPWQAKMVSHHNLTTGATLINEQWLLTTAK -Cation:K
SGLWTVQAMDPNAAYVNMSNHHR
SGLWTVQAMDPNAAYVNMSNHHR -Cation:K
SHEIWTHSC(Carbamidomethyl)PQSPGNGTDASH
SHEIWTHSC(Carbamidomethyl)PQSPGNGTDASH -Cation:K
SHHNLTTGATLINEQWLLTTAK
SHHNLTTGATLINEQWLLTTAK -Cation:K
SINTTNVMGTSLTVR
SINTTNVMGTSLTVR -Cation:K
SIPAC(Carbamidomethyl)VPWSPYLFQPNDTC(Carbamidomethyl)IVSGWGR
SIPAC(Carbamidomethyl)VPWSPYLFQPNDTC(Carbamidomethyl)IVSGWGR -Cation:K
SIVQTNC(Carbamidomethyl)SK
SIVQTNC(Carbamidomethyl)SK -Cation:K
SLDSTPQDGNVVVAC(Carbamidomethyl)LVQGFFPQEPLSVTWSESGQNVTAR
SLDSTPQDGNVVVAC(Carbamidomethyl)LVQGFFPQEPLSVTWSESGQNVTAR -Cation:K
SLGNVNFTVSAEALESQELC(Carbamidomethyl)GTEVPSVPEHGR
SLGNVNFTVSAEALESQELC(Carbamidomethyl)GTEVPSVPEHGR -Cation:K
SLTFNETYQDISELVYGAK
SLTFNETYQDISELVYGAK -Cation:K
SNATTDEHGLVQFSINTTNVMGTSLTVRVNYK
SNATTDEHGLVQFSINTTNVMGTSLTVRVNYK -Cation:K
SNSTNIFFSPVSIATAFAMLSLGTK
SNSTNIFFSPVSIATAFAMLSLGTK -Cation:K
SNVTDC(Carbamidomethyl)SGNFC(Carbamidomethyl)LFR
SNVTDC(Carbamidomethyl)SGNFC(Carbamidomethyl)LFR -Cation:K
SRYPHKPEINSTTHPGADLQENFC(Carbamidomethyl)R
SRYPHKPEINSTTHPGADLQENFC(Carbamidomethyl)R -Cation:K
SSNPNATSSSSQDPESLQDRGEGK
SSNPNATSSSSQDPESLQDRGEGK -Cation:K
SSWVLLMKYLGNATAIFFLPDEGK
SSWVLLMKYLGNATAIFFLPDEGK -Cation:K
STGKPTLYNVSLVMSDTAGTC(Carbamidomethyl)
STGKPTLYNVSLVMSDTAGTC(Carbamidomethyl) -Cation:K
SVQEIQATFFYFTPN
SVQEIQATFFYFTPN -Cation:K
SVQEIQATFFYFTPNK
SVQEIQATFFYFTPNK -Cation:K
SVQEIQATFFYFTPNKTED
SVQEIQATFFYFTPNKTED -Cation:K
SVQEIQATFFYFTPNKTEDT
SVQEIQATFFYFTPNKTEDT -Cation:K
SVQEIQATFFYFTPNKTEDTI
SVQEIQATFFYFTPNKTEDTI -Cation:K
SVQEIQATFFYFTPNKTEDTIF
SVQEIQATFFYFTPNKTEDTIF -Cation:K
SVQEIQATFFYFTPNKTEDTIFLR
SVQEIQATFFYFTPNKTEDTIFLR -Cation:K
SWPAVGNC(Carbamidomethyl)SSALR
SWPAVGNC(Carbamidomethyl)SSALR -Cation:K
SYLNETVTVSASLESVR
SYLNETVTVSASLESVR -Cation:K
THDEILEGLNFNLTEIPEAQIHEGFQELLR
THDEILEGLNFNLTEIPEAQIHEGFQELLR -Cation:K
TKPREEQFNSTFR
TKPREEQFNSTFR -Cation:K
TLNQSSDELQLSMGNAMFVK
TLNQSSDELQLSMGNAMFVK -Cation:K
TLYETEVFSTDFSNISAAK
TLYETEVFSTDFSNISAAK -Cation:K
TPLTANITK
TPLTANITK -Cation:K
TTC(Carbamidomethyl)C(Carbamidomethyl)TLSEEFAC(Carbamidomethyl)VDNLADLVFGELC(Carbamidomethyl)GVNENR
TTC(Carbamidomethyl)C(Carbamidomethyl)TLSEEFAC(Carbamidomethyl)VDNLADLVFGELC(Carbamidomethyl)GVNENR -Cation:K
TVLTPATNHMGNVTF
TVLTPATNHMGNVTF -Cation:K
TVLTPATNHMGNVTFTI
TVLTPATNHMGNVTFTI -Cation:K
TVLTPATNHMGNVTFTIPANR
TVLTPATNHMGNVTFTIPANR -Cation:K
TVLTPATNHMGNVTFTIPANREF
TVLTPATNHMGNVTFTIPANREF -Cation:K
TVVELKYTGNASALFILPDQDK
TVVELKYTGNASALFILPDQDK -Cation:K
VC(Carbamidomethyl)QDC(Carbamidomethyl)PLLAPLNDTR
VC(Carbamidomethyl)QDC(Carbamidomethyl)PLLAPLNDTR -Cation:K
VC(Carbamidomethyl)QDC(Carbamidomethyl)PLLAPLNDTRVVHA
VC(Carbamidomethyl)QDC(Carbamidomethyl)PLLAPLNDTRVVHA -Cation:K
VFEC(Carbamidomethyl)LPQHAMFGNDTITC(Carbamidomethyl)TTHGNWTKLPEC(Carbamidomethyl)R
VFEC(Carbamidomethyl)LPQHAMFGNDTITC(Carbamidomethyl)TTHGNWTKLPEC(Carbamidomethyl)R -Cation:K
VFHIHNESWVLLTPK
VFHIHNESWVLLTPK -Cation:K
VFPLSLDSTPQDGNVVVAC(Carbamidomethyl)LVQGFFPQEPLSVTWSESGQNVT
VFPLSLDSTPQDGNVVVAC(Carbamidomethyl)LVQGFFPQEPLSVTWSESGQNVT -Cation:K
VFPLSLDSTPQDGNVVVAC(Carbamidomethyl)LVQGFFPQEPLSVTWSESGQNVTAR
VFPLSLDSTPQDGNVVVAC(Carbamidomethyl)LVQGFFPQEPLSVTWSESGQNVTAR -Cation:K
VFPLSLDSTPQDGNVVVAC(Carbamidomethyl)LVQGFFPQEPLSVTWSESGQNVTARN
VFPLSLDSTPQDGNVVVAC(Carbamidomethyl)LVQGFFPQEPLSVTWSESGQNVTARN -Cation:K
VFPLSLDSTPQDGNVVVAC(Carbamidomethyl)LVQGFFPQEPLSVTWSESGQNVTARNF
VFPLSLDSTPQDGNVVVAC(Carbamidomethyl)LVQGFFPQEPLSVTWSESGQNVTARNF -Cation:K
VFPLSLDSTPQDGNVVVAC(Carbamidomethyl)LVQGFFPQEPLSVTWSESGQNVTARNFPPSQ
VFPLSLDSTPQDGNVVVAC(Carbamidomethyl)LVQGFFPQEPLSVTWSESGQNVTARNFPPSQ -Cation:K
VGQLQLSHNLSLVILVPQNLK
VGQLQLSHNLSLVILVPQNLK -Cation:K
VLDYLNETQQLTPEIK
VLDYLNETQQLTPEIK -Cation:K
VLSNNSDANLELINTWVAK
VLSNNSDANLELINTWVAK -Cation:K
VNFTVSAEALESQELC(Carbamidomethyl)GTEVPSVPEHGR
VNFTVSAEALESQELC(Carbamidomethyl)GTEVPSVPEHGR -Cation:K
VSHHNLTTGATLINEQWLLTTAK
VSHHNLTTGATLINEQWLLTTAK -Cation:K
VSNQTLSLFFTVLQDVPVR
VSNQTLSLFFTVLQDVPVR -Cation:K
VTAC(Carbamidomethyl)HSSQPNATLYK
VTAC(Carbamidomethyl)HSSQPNATLYK -Cation:K
VTISGVYDLGDVLEEMGIADLFTNQAN
VTISGVYDLGDVLEEMGIADLFTNQAN -Cation:K
VTISGVYDLGDVLEEMGIADLFTNQANFSR
VTISGVYDLGDVLEEMGIADLFTNQANFSR -Cation:K
VVLHPNYSQVDIGLIK
VVLHPNYSQVDIGLIK -Cation:K
VYIHPFHLVIHNESTC(Carbamidomethyl)EQLAK
VYIHPFHLVIHNESTC(Carbamidomethyl)EQLAK -Cation:K
VYKPSAGNNSLYR
VYKPSAGNNSLYR -Cation:K
WNYAPSGIDIFTKENLTAPGSDSAVFFEQGTTR
WNYAPSGIDIFTKENLTAPGSDSAVFFEQGTTR -Cation:K
WQAKMVSHHNLTTGATLINEQWLLTTAK
WQAKMVSHHNLTTGATLINEQWLLTTAK -Cation:K
YAEDKFNETT
YAEDKFNETT -Cation:K
YAEDKFNETTEK
YAEDKFNETTEK -Cation:K
YKNNSDISSTR
YKNNSDISSTR -Cation:K
YLGNATAIFFLPDEGK
YLGNATAIFFLPDEGK -Cation:K
YLNETVTVSASLESVR
YLNETVTVSASLESVR -Cation:K
[truncated: 6 more rows]

## Sheet: Table
	20_Y1	10_Y1	40_2	30_2	20_2	10_2	30_2_Cation:K
[truncated: 9 more rows]

[truncated: 8 more sheets: Comparison, 20_Y1, 10_Y1, 40_2, 30_2, 20_2, 10_2, 30_2_CationK]
