# Supplementary material for: The effectiveness of filtering glycopeptide peak list files for Y ions
Source: Royal Society of Chemistry journal article supplement (doi:10.1039/c9mo00178f), 2020-02-06
Supplement: c9mo00178f2.xlsx [file c9mo00178f2.xlsx]

## Sheet: Peptides_Searched
AHEVSEISVRTVYPP
AHEVSEISVRTVYPPEE
AHEVSEISVRTVYPPEEETGER
ALSPQQVTRLPSGY
AQDGGPVGTELF
AQDGGPVGTELFR
ATAPTAQAPR
AVAVTLQSH
DALPDNENKKPTAIPK
DFTAAFPR

## Sheet: Summary
Search (# peaks)	15	10	7	5
# Results	184	143	95	54
Suggested Glycans	60	55	44	28
Unique Glycan Assignments	33	29	24	14
Unique Peptide Sequences	10	10	9	7

## Sheet: 15_2_20ppm
m/z	z	Fraction	RT	MSMS Info	Peptide	Mod Mass	Possible Mods	Y0, z=3	Y0, z=2	Y0, z=1	Y1, z=3	Y1, z=2	Y1, z=1
1019.07	3	180417_05_HCD	41.75	16401	AHEVSEISVRTVYPP	1371.33		0	1	0	0	1	0
895.384	4	180417_05_HCD	44.1	17603	AHEVSEISVRTVYPP	1894.64	HexNAc2Hex2NeuAc4	0	1	1	0	1	1
1193.52	3	180417_05_HCD	44.5	17810	AHEVSEISVRTVYPP	1894.66	HexNAc2Hex2NeuAc4	0	1	1	0	1	1
895.634	4	180417_05_HCD	44.067	17588	AHEVSEISVRTVYPP	1895.64		0	1	1	0	1	0
1290.54	3	180417_05_HCD	44.6	17868	AHEVSEISVRTVYPP	2185.75		0	1	0	0	1	0
1137.95	4	180417_05_HCD	40.8	15902	AHEVSEISVRTVYPP	2864.92		0	1	0	0	1	0
957.928	4	180417_05_HCD	42.517	16791	AHEVSEISVRTVYPPEE	1886.73		0	1	0	0	1	0
959.67	4	180417_05_HCD	45.167	18135	AHEVSEISVRTVYPPEE	1893.7		0	1	0	0	1	0
959.905	4	180417_05_HCD	43.083	17075	AHEVSEISVRTVYPPEE	1894.64	HexNAc2Hex2NeuAc4	0	1	0	0	1	0
959.907	4	180417_05_HCD	43.633	17372	AHEVSEISVRTVYPPEE	1894.65	HexNAc2Hex2NeuAc4	0	1	1	0	1	0
1279.54	3	180417_05_HCD	42.983	17018	AHEVSEISVRTVYPPEE	1894.65	HexNAc2Hex2NeuAc4	0	1	1	0	1	0
959.907	4	180417_05_HCD	44.167	17640	AHEVSEISVRTVYPPEE	1894.65	HexNAc2Hex2NeuAc4	0	1	1	0	1	0
1279.54	3	180417_05_HCD	43.65	17387	AHEVSEISVRTVYPPEE	1894.66	HexNAc2Hex2NeuAc4	0	1	1	0	1	0
1279.54	3	180417_05_HCD	44.25	17682	AHEVSEISVRTVYPPEE	1894.66	HexNAc2Hex2NeuAc4	0	1	1	0	1	0
1279.56	3	180417_05_HCD	43.25	17161	AHEVSEISVRTVYPPEE	1894.7		0	1	1	0	1	0
1279.87	3	180417_05_HCD	44.333	17727	AHEVSEISVRTVYPPEE	1895.64		0	1	1	0	1	0
960.159	4	180417_05_HCD	42.867	16958	AHEVSEISVRTVYPPEE	1895.66		0	1	1	0	1	0
1031.67	4	180417_05_HCD	44.083	17596	AHEVSEISVRTVYPPEE	2181.7		0	1	0	0	1	0
1032.68	4	180417_05_HCD	43.45	17272	AHEVSEISVRTVYPPEE	2185.74		0	1	0	0	1	0
1033.18	4	180417_05_HCD	42.917	16982	AHEVSEISVRTVYPPEE	2187.74		0	1	0	0	1	0
1498.63	3	180417_05_HCD	41.483	16265	AHEVSEISVRTVYPPEE	2551.91		0	1	0	0	1	0
1182.71	4	180417_05_HCD	44.433	17779	AHEVSEISVRTVYPPEE	2785.84		0	1	0	0	1	0
1196.72	4	180417_05_HCD	40.717	15863	AHEVSEISVRTVYPPEE	2841.91		0	1	0	0	1	0
1196.73	4	180417_05_HCD	39.483	15243	AHEVSEISVRTVYPPEE	2841.95	HexNAc3Hex3NeuAc6	0	1	0	0	1	0
1196.99	4	180417_05_HCD	39.533	15268	AHEVSEISVRTVYPPEE	2842.98		0	1	0	0	1	0
1196.99	4	180417_05_HCD	40.8	15905	AHEVSEISVRTVYPPEE	2842.99		0	1	0	0	1	0
1267.52	4	180417_05_HCD	39.75	15373	AHEVSEISVRTVYPPEE	3125.12		0	1	0	0	1	0
1269.5	4	180417_05_HCD	39.8	15400	AHEVSEISVRTVYPPEE	3133.04		0	1	0	0	1	0
1269.52	4	180417_05_HCD	40.2	15599	AHEVSEISVRTVYPPEE	3133.1		0	1	0	0	1	0
1280.35	5	180417_05_HCD	42.617	16832	AHEVSEISVRTVYPPEE	4455.77		0	1	0	0	1	0
1102.7	4	180417_05_HCD	41.25	16143	AHEVSEISVRTVYPPEEETGER	1893.56		1	1	0	1	1	0
1102.97	4	180417_05_HCD	42.533	16799	AHEVSEISVRTVYPPEEETGER	1894.66	HexNAc2Hex2NeuAc4	0	1	0	1	1	0
1102.98	4	180417_05_HCD	43.25	17165	AHEVSEISVRTVYPPEEETGER	1894.67		1	1	0	1	1	0
1102.98	4	180417_05_HCD	42.017	16536	AHEVSEISVRTVYPPEEETGER	1894.67		0	1	0	1	1	0
1103.22	4	180417_05_HCD	41.4	16223	AHEVSEISVRTVYPPEEETGER	1895.65		1	1	0	1	1	0
882.78	5	180417_05_HCD	42.65	16851	AHEVSEISVRTVYPPEEETGER	1895.66		0	1	0	1	1	0
1470.63	3	180417_05_HCD	43.017	17036	AHEVSEISVRTVYPPEEETGER	1895.67		0	1	0	1	1	0
882.977	5	180417_05_HCD	42.35	16705	AHEVSEISVRTVYPPEEETGER	1896.65		1	1	0	1	1	0
1103.47	4	180417_05_HCD	41.067	16048	AHEVSEISVRTVYPPEEETGER	1896.66		0	1	0	1	1	0
883.178	5	180417_05_HCD	43	17029	AHEVSEISVRTVYPPEEETGER	1897.65		0	1	0	1	1	0
1175.74	4	180417_05_HCD	42.767	16908	AHEVSEISVRTVYPPEEETGER	2185.73		0	1	0	1	1	0
1176	4	180417_05_HCD	42.1	16576	AHEVSEISVRTVYPPEEETGER	2186.76		0	1	0	1	1	0
941.193	5	180417_05_HCD	42.7	16880	AHEVSEISVRTVYPPEEETGER	2187.73		0	1	0	1	1	0
1186.5	4	180417_05_HCD	44	17552	AHEVSEISVRTVYPPEEETGER	2228.75		0	1	0	1	1	0
822.052	3	180417_05_HCD	44.867	18001	ALSPQQVTRLPSGY	947.329	HexNAcHexNeuAc2	0	1	1	0	0	1
943.761	3	180417_05_HCD	45.583	18354	ALSPQQVTRLPSGY	1312.46	HexNAc2Hex2NeuAc2	0	0	1	0	0	1
943.762	3	180417_05_HCD	44.583	17857	ALSPQQVTRLPSGY	1312.46	HexNAc2Hex2NeuAc2	0	0	1	0	0	1
1040.5	3	180417_05_HCD	44.633	17881	ALSPQQVTRLPSGY	1602.68		0	0	1	0	0	1
1040.79	3	180417_05_HCD	43.917	17510	ALSPQQVTRLPSGY	1603.55	HexNAc2Hex2NeuAc3	0	0	1	0	0	1
1040.8	3	180417_05_HCD	44.533	17826	ALSPQQVTRLPSGY	1603.56	HexNAc2Hex2NeuAc3	0	0	1	0	0	1
1065.48	3	180417_05_HCD	43.467	17284	ALSPQQVTRLPSGY	1677.61	HexNAc3Hex3NeuAc2	0	0	1	0	0	1
1162.51	3	180417_05_HCD	43.617	17361	ALSPQQVTRLPSGY	1968.7	HexNAc3Hex3NeuAc3	0	0	1	0	0	1
1232.5	3	180417_05_HCD	44.9	18014	ALSPQQVTRLPSGY	2178.68		0	0	1	0	0	1
854.361	3	180417_05_HCD	50.25	20714	AQDGGPVGTELF	1370.5	HexNAc3Hex2FucNeuAc	0	0	1	0	0	1
1260.28	4	180417_05_HCD	50.133	20649	AQDGGPVGTELF	3847.51		0	0	1	0	0	1
1270.52	4	180417_05_HCD	49.667	20432	AQDGGPVGTELF	3888.5		0	0	1	0	0	1
892.696	3	180417_05_HCD	43.15	17106	AQDGGPVGTELFR	1329.4		0	0	1	0	0	1
906.395	3	180417_05_HCD	43.733	17422	AQDGGPVGTELFR	1370.5	HexNAc3Hex2FucNeuAc	0	0	1	0	0	1
1147.51	3	180417_05_HCD	48.3	19732	AQDGGPVGTELFR	2093.83		0	0	1	0	0	1
765.996	3	180417_05_HCD	45.033	18085	ATAPTAQAPR	1312.45	HexNAc2Hex2NeuAc2	0	0	1	0	0	1
766	3	180417_05_HCD	23.15	6988	ATAPTAQAPR	1312.46	HexNAc2Hex2NeuAc2	0	0	1	0	0	1
766	3	180417_05_HCD	22.633	6707	ATAPTAQAPR	1312.46	HexNAc2Hex2NeuAc2	0	0	1	0	0	1
766.331	3	180417_05_HCD	45.233	18169	ATAPTAQAPR	1313.45		0	0	1	0	0	1
773.328	3	180417_05_HCD	22.75	6780	ATAPTAQAPR	1334.44	HexNAc2Hex2NeuAc2+Cation:Na	0	0	1	0	0	1
863.026	3	180417_05_HCD	45.3	18203	ATAPTAQAPR	1603.54	HexNAc2Hex2NeuAc3	0	0	1	0	0	1
863.365	3	180417_05_HCD	45.267	18190	ATAPTAQAPR	1604.55		0	0	1	0	0	1
921.394	3	180417_05_HCD	22.85	6827	ATAPTAQAPR	1778.64		0	0	1	0	0	1
960.399	3	180417_05_HCD	46.183	18674	ATAPTAQAPR	1895.65		0	0	1	0	0	1
964.42	3	180417_05_HCD	45.95	18540	ATAPTAQAPR	1907.72		0	0	1	0	0	1
1082.47	3	180417_05_HCD	44.45	17787	ATAPTAQAPR	2261.86		0	0	1	0	0	1
1439.27	3	180417_05_HCD	46.533	18834	ATAPTAQAPR	3332.28		0	0	1	0	0	1
1293.75	4	180417_05_HCD	45.433	18278	ATAPTAQAPR	4188.43		0	0	1	0	0	1
624.949	3	180417_05_HCD	31.867	11428	AVAVTLQSH	947.323	HexNAcHexNeuAc2	0	0	1	0	0	1
624.949	3	180417_05_HCD	32.4	11675	AVAVTLQSH	947.323	HexNAcHexNeuAc2	0	0	1	0	0	1
638.953	3	180417_05_HCD	40.05	15527	AVAVTLQSH	989.334	HexNAcHexNeuAcNeuAcAc	0	0	1	0	0	1
735.985	3	180417_05_HCD	34.633	12816	AVAVTLQSH	1280.43	HexNAcHexNeuAc2NeuAcAc	0	0	1	0	0	1
746.66	3	180417_05_HCD	31.133	11087	AVAVTLQSH	1312.46	HexNAc2Hex2NeuAc2	0	0	1	0	0	1
749.988	3	180417_05_HCD	36.7	13881	AVAVTLQSH	1322.44	HexNAcHexNeuAcNeuAcAc2	0	0	1	0	0	1
749.989	3	180417_05_HCD	42.167	16608	AVAVTLQSH	1322.44	HexNAcHexNeuAcNeuAcAc2	0	0	1	0	0	1
749.989	3	180417_05_HCD	42.7	16875	AVAVTLQSH	1322.44	HexNAcHexNeuAcNeuAcAc2	0	0	1	0	0	1
760.664	3	180417_05_HCD	32.95	11933	AVAVTLQSH	1354.47	HexNAc2Hex2NeuAcNeuAcAc	0	0	1	0	0	1
760.665	3	180417_05_HCD	31.633	11324	AVAVTLQSH	1354.47	HexNAc2Hex2NeuAcNeuAcAc	0	0	1	0	0	1
760.665	3	180417_05_HCD	39.85	15423	AVAVTLQSH	1354.47	HexNAc2Hex2NeuAcNeuAcAc	0	0	1	0	0	1
760.665	3	180417_05_HCD	39.3	15148	AVAVTLQSH	1354.47	HexNAc2Hex2NeuAcNeuAcAc	0	0	1	0	0	1
766.008	3	180417_05_HCD	27.683	9395	AVAVTLQSH	1370.5	HexNAc3Hex2FucNeuAc	0	0	1	0	0	1
767.991	3	180417_05_HCD	33.133	12028	AVAVTLQSH	1376.45	HexNAc2Hex2NeuAcNeuAcAc+Cation:Na	0	0	1	0	0	1
774.667	3	180417_05_HCD	39.267	15134	AVAVTLQSH	1396.48	HexNAc2Hex2NeuAcAc2	0	0	1	0	0	1
774.668	3	180417_05_HCD	41.083	16053	AVAVTLQSH	1396.48	HexNAc2Hex2NeuAcAc2	0	0	1	0	0	1
774.668	3	180417_05_HCD	40.55	15777	AVAVTLQSH	1396.48	HexNAc2Hex2NeuAcAc2	0	0	1	0	0	1
774.668	3	180417_05_HCD	39.817	15406	AVAVTLQSH	1396.48	HexNAc2Hex2NeuAcAc2	0	0	1	0	0	1
774.669	3	180417_05_HCD	35.183	13104	AVAVTLQSH	1396.48	HexNAc2Hex2NeuAcAc2	0	0	1	0	0	1
781.995	3	180417_05_HCD	40.733	15872	AVAVTLQSH	1418.46	HexNAc2Hex2NeuAcAc2+Cation:Na	0	0	1	0	0	1
795.346	3	180417_05_HCD	30.367	10744	AVAVTLQSH	1458.51	HexNAc2Hex2FucNeuAc2	0	0	1	0	0	1
809.347	3	180417_05_HCD	33.017	11971	AVAVTLQSH	1500.52	HexNAc2Hex2FucNeuAcNeuAcAc	0	0	1	0	0	1
809.349	3	180417_05_HCD	31.683	11340	AVAVTLQSH	1500.52	HexNAc2Hex2FucNeuAcNeuAcAc	0	0	1	0	0	1
812.36	3	180417_05_HCD	40.433	15724	AVAVTLQSH	1509.56		0	0	1	0	0	1
814.348	3	180417_05_HCD	28.917	10057	AVAVTLQSH	1515.52	HexNAc3Hex2NeuAc2	0	0	1	0	0	1
823.354	3	180417_05_HCD	34.017	12481	AVAVTLQSH	1542.54		0	0	1	0	0	1
823.354	3	180417_05_HCD	38.633	14817	AVAVTLQSH	1542.54		0	0	1	0	0	1
823.354	3	180417_05_HCD	39.45	15228	AVAVTLQSH	1542.54		0	0	1	0	0	1
823.354	3	180417_05_HCD	39.983	15486	AVAVTLQSH	1542.54		0	0	1	0	0	1
830.682	3	180417_05_HCD	39.65	15326	AVAVTLQSH	1564.52		0	0	1	0	0	1
957.37	3	180417_05_HCD	40.617	15811	AVAVTLQSH	1944.58		0	0	1	0	0	1
980.079	3	180417_05_HCD	37.767	14396	AVAVTLQSH	2012.71		0	0	1	0	0	1
985.422	3	180417_05_HCD	28.6	9885	AVAVTLQSH	2028.74		0	0	1	0	0	1
753.827	4	180417_05_HCD	42.467	16763	AVAVTLQSH	2086.78		0	0	1	0	0	1
1067.41	3	180417_05_HCD	34.05	12500	AVAVTLQSH	2274.71		0	0	1	0	0	1
1087.11	3	180417_05_HCD	28.717	9948	AVAVTLQSH	2333.82	HexNAc4Hex4NeuAc3	0	0	1	0	0	1
1087.79	3	180417_05_HCD	28.467	9823	AVAVTLQSH	2335.84		0	0	1	0	0	1
1095.11	3	180417_05_HCD	26.4	8729	AVAVTLQSH	2357.8		0	0	1	0	0	1
1120.12	3	180417_05_HCD	32.05	11516	AVAVTLQSH	2432.83		0	0	1	0	0	1
1120.47	3	180417_05_HCD	31.817	11396	AVAVTLQSH	2433.88		0	0	1	0	0	1
1120.78	3	180417_05_HCD	31.367	11205	AVAVTLQSH	2434.81		0	0	1	0	0	1
1120.78	3	180417_05_HCD	31.65	11330	AVAVTLQSH	2434.81		0	0	1	0	0	1
1120.78	3	180417_05_HCD	31.433	11234	AVAVTLQSH	2434.81		0	0	1	0	0	1
1124.45	3	180417_05_HCD	40.617	15806	AVAVTLQSH	2445.84		0	0	1	0	0	1
1124.47	3	180417_05_HCD	40.717	15866	AVAVTLQSH	2445.89		0	0	1	0	0	1
1125.48	3	180417_05_HCD	36.567	13811	AVAVTLQSH	2448.92		0	0	1	0	0	1
1128.1	3	180417_05_HCD	31.35	11195	AVAVTLQSH	2456.77		0	0	1	0	0	1
1150.14	3	180417_05_HCD	27.95	9539	AVAVTLQSH	2522.9		0	0	1	0	0	1
1160.46	3	180417_05_HCD	32.967	11942	AVAVTLQSH	2553.87		0	0	1	0	0	1
1160.48	3	180417_05_HCD	42.4	16731	AVAVTLQSH	2553.92		0	0	1	0	0	1
1160.77	3	180417_05_HCD	42.367	16714	AVAVTLQSH	2554.79		0	0	1	0	0	1
1160.79	3	180417_05_HCD	42.083	16567	AVAVTLQSH	2554.83		0	0	1	0	0	1
1161.11	3	180417_05_HCD	42.233	16647	AVAVTLQSH	2555.81		0	0	1	0	0	1
1161.44	3	180417_05_HCD	28.767	9965	AVAVTLQSH	2556.79		0	0	1	0	0	1
1212.77	3	180417_05_HCD	32.883	11894	AVAVTLQSH	2710.78		0	0	1	0	0	1
914.376	4	180417_05_HCD	39.517	15260	AVAVTLQSH	2728.97		0	0	1	0	0	1
914.386	4	180417_05_HCD	39.683	15343	AVAVTLQSH	2729.01		0	0	1	0	0	1
1240.52	3	180417_05_HCD	45.8	18466	AVAVTLQSH	2794.03		0	0	1	0	0	1
1240.53	3	180417_05_HCD	45.567	18352	AVAVTLQSH	2794.08		0	0	1	0	0	1
1263.82	3	180417_05_HCD	31.6	11304	AVAVTLQSH	2863.95	HexNAc3Hex3NeuAc6+Cation:Na	0	0	1	0	0	1
1264.15	3	180417_05_HCD	31.95	11459	AVAVTLQSH	2864.92		0	0	1	0	0	1
957.385	4	180417_05_HCD	36.85	13948	AVAVTLQSH	2901.01		0	0	1	0	0	1
986.95	4	180417_05_HCD	39.9	15450	AVAVTLQSH	3019.27		0	0	1	0	0	1
1424.28	3	180417_05_HCD	32.05	11510	AVAVTLQSH	3345.32		0	0	1	0	0	1
1424.63	3	180417_05_HCD	32.167	11565	AVAVTLQSH	3346.37		0	0	1	0	0	1
1431.55	3	180417_05_HCD	33.633	12288	AVAVTLQSH	3367.11		0	0	1	0	0	1
1091.95	4	180417_05_HCD	28.95	10068	AVAVTLQSH	3439.26		0	0	1	0	0	1
1093.45	4	180417_05_HCD	27.717	9410	AVAVTLQSH	3445.26		0	0	1	0	0	1
1103.47	4	180417_05_HCD	41.067	16048	AVAVTLQSH	3485.36		0	0	1	0	0	1
1103.98	4	180417_05_HCD	41.05	16034	AVAVTLQSH	3487.37		0	0	1	0	0	1
1124.48	4	180417_05_HCD	42.183	16620	AVAVTLQSH	3569.39		0	0	1	0	0	1
1126.48	4	180417_05_HCD	42.117	16583	AVAVTLQSH	3577.39		0	0	1	0	0	1
1127.46	4	180417_05_HCD	32.333	11639	AVAVTLQSH	3581.3		0	0	1	0	0	1
1135.93	4	180417_05_HCD	28.45	9815	AVAVTLQSH	3615.21		0	0	1	0	0	1
1136.19	4	180417_05_HCD	28.883	10032	AVAVTLQSH	3616.23		0	0	1	0	0	1
1140.99	4	180417_05_HCD	39.15	15076	AVAVTLQSH	3635.45		0	0	1	0	0	1
1525.59	3	180417_05_HCD	28.1	9621	AVAVTLQSH	3649.25		0	0	1	0	0	1
1149.45	4	180417_05_HCD	28.383	9775	AVAVTLQSH	3669.28		0	0	1	0	0	1
1162.5	4	180417_05_HCD	36.717	13887	AVAVTLQSH	3721.46		0	0	1	0	0	1
936.597	5	180417_05_HCD	33.75	12345	AVAVTLQSH	3753.45		0	0	1	0	0	1
936.799	5	180417_05_HCD	33.55	12248	AVAVTLQSH	3754.46		0	0	1	0	0	1
1180.49	4	180417_05_HCD	34.85	12921	AVAVTLQSH	3793.41		0	0	1	0	0	1
1183.01	4	180417_05_HCD	41.4	16217	AVAVTLQSH	3803.52		0	0	1	0	0	1
1214.51	4	180417_05_HCD	32.383	11664	AVAVTLQSH	3929.53		0	0	1	0	0	1
1221.53	4	180417_05_HCD	29.433	10328	AVAVTLQSH	3957.59		0	0	1	0	0	1
1234.5	4	180417_05_HCD	40.767	15888	AVAVTLQSH	4009.46		0	0	1	0	0	1
1235.51	4	180417_05_HCD	34.4	12693	AVAVTLQSH	4013.53		0	0	1	0	0	1
1235.53	4	180417_05_HCD	39.217	15105	AVAVTLQSH	4013.59		0	0	1	0	0	1
1235.54	4	180417_05_HCD	38.4	14703	AVAVTLQSH	4013.62		0	0	1	0	0	1
1236.04	4	180417_05_HCD	38.95	14972	AVAVTLQSH	4015.64		0	0	1	0	0	1
1253.98	4	180417_05_HCD	40.133	15568	AVAVTLQSH	4087.41		0	0	1	0	0	1
1256.03	4	180417_05_HCD	40	15495	AVAVTLQSH	4095.57		0	0	1	0	0	1
1307.51	4	180417_05_HCD	40.867	15941	AVAVTLQSH	4301.51		0	0	1	0	0	1
1066.87	5	180417_05_HCD	39.417	15209	AVAVTLQSH	4404.79		0	0	1	0	0	1
1124.48	5	180417_05_HCD	44.05	17581	AVAVTLQSH	4692.84		0	0	1	0	0	1
1420.06	4	180417_05_HCD	35	13005	AVAVTLQSH	4751.7		0	0	1	0	0	1
1448.59	4	180417_05_HCD	31.267	11152	AVAVTLQSH	4865.81		0	0	1	0	0	1
675.32	4	180417_05_HCD	33.017	11966	DALPDNENKKPTAIPK	947.324	HexNAcHexNeuAc2	0	1	0	0	1	0
624.6	3	180417_05_HCD	48.117	19642	DFTAAFPR	947.328	HexNAcHexNeuAc2	0	0	1	0	0	1
753.634	3	180417_05_HCD	46.65	18902	DFTAAFPR	1334.43	HexNAc2Hex2NeuAc2+Cation:Na	0	0	1	0	0	1
770.989	3	180417_05_HCD	44.367	17746	DFTAAFPR	1386.5	HexNAc3Hex3NeuAc	0	0	1	0	0	1
770.99	3	180417_05_HCD	43.85	17477	DFTAAFPR	1386.5	HexNAc3Hex3NeuAc	0	0	1	0	0	1
778.324	3	180417_05_HCD	44.183	17651	DFTAAFPR	1408.5		0	0	1	0	0	1
868.021	3	180417_05_HCD	45.3	18200	DFTAAFPR	1677.59	HexNAc3Hex3NeuAc2	0	0	1	0	0	1
868.021	3	180417_05_HCD	45.817	18472	DFTAAFPR	1677.59	HexNAc3Hex3NeuAc2	0	0	1	0	0	1
892.696	3	180417_05_HCD	43.15	17106	DFTAAFPR	1751.62	HexNAc4Hex4NeuAc	0	0	1	0	0	1
894.084	3	180417_05_HCD	48.217	19689	DFTAAFPR	1755.78		0	0	1	0	0	1
989.732	3	180417_05_HCD	44.833	17983	DFTAAFPR	2042.72	HexNAc4Hex4NeuAc2	0	0	1	0	0	1
989.735	3	180417_05_HCD	44.283	17698	DFTAAFPR	2042.73	HexNAc4Hex4NeuAc2	0	0	1	0	0	1
1017.22	4	180417_05_HCD	46.783	18964	DFTAAFPR	3141.4		0	0	1	0	0	1
1156.97	4	180417_05_HCD	43.683	17403	DFTAAFPR	3700.41		0	0	1	0	0	1
973.647	5	180417_05_HCD	44	17548	DFTAAFPR	3939.75		0	0	1	0	0	1

## Sheet: 10_2_20ppm
m/z	z	Fraction	RT	MSMS Info	Peptide	Mod Mass	Possible Mods	Y0, z=3	Y0, z=2	Y0, z=1	Y1, z=3	Y1, z=2	Y1, z=1
1290.54	3	180417_05_HCD	44.6	17868	AHEVSEISVRTVYPP	2185.75		0	1	0	0	1	0
957.928	4	180417_05_HCD	42.517	16791	AHEVSEISVRTVYPPEE	1886.73		0	1	0	0	1	0
959.905	4	180417_05_HCD	43.083	17075	AHEVSEISVRTVYPPEE	1894.64	HexNAc2Hex2NeuAc4	0	1	0	0	1	0
959.907	4	180417_05_HCD	43.633	17372	AHEVSEISVRTVYPPEE	1894.65	HexNAc2Hex2NeuAc4	0	1	0	0	1	0
1279.54	3	180417_05_HCD	42.983	17018	AHEVSEISVRTVYPPEE	1894.65	HexNAc2Hex2NeuAc4	0	1	0	0	1	0
959.907	4	180417_05_HCD	44.167	17640	AHEVSEISVRTVYPPEE	1894.65	HexNAc2Hex2NeuAc4	0	1	0	0	1	0
1279.54	3	180417_05_HCD	43.65	17387	AHEVSEISVRTVYPPEE	1894.66	HexNAc2Hex2NeuAc4	0	1	0	0	1	0
1279.54	3	180417_05_HCD	44.25	17682	AHEVSEISVRTVYPPEE	1894.66	HexNAc2Hex2NeuAc4	0	1	0	0	1	0
1279.56	3	180417_05_HCD	43.25	17161	AHEVSEISVRTVYPPEE	1894.7		0	1	0	0	1	0
1279.87	3	180417_05_HCD	44.333	17727	AHEVSEISVRTVYPPEE	1895.64		0	1	0	0	1	0
960.159	4	180417_05_HCD	42.867	16958	AHEVSEISVRTVYPPEE	1895.66		0	1	0	0	1	0
1031.67	4	180417_05_HCD	44.083	17596	AHEVSEISVRTVYPPEE	2181.7		0	1	0	0	1	0
1032.68	4	180417_05_HCD	43.45	17272	AHEVSEISVRTVYPPEE	2185.74		0	1	0	0	1	0
1033.18	4	180417_05_HCD	42.917	16982	AHEVSEISVRTVYPPEE	2187.74		0	1	0	0	1	0
1196.72	4	180417_05_HCD	40.717	15863	AHEVSEISVRTVYPPEE	2841.91		0	1	0	0	1	0
1196.73	4	180417_05_HCD	39.483	15243	AHEVSEISVRTVYPPEE	2841.95	HexNAc3Hex3NeuAc6	0	1	0	0	1	0
1196.99	4	180417_05_HCD	39.533	15268	AHEVSEISVRTVYPPEE	2842.98		0	1	0	0	1	0
1196.99	4	180417_05_HCD	40.8	15905	AHEVSEISVRTVYPPEE	2842.99		0	1	0	0	1	0
1267.52	4	180417_05_HCD	39.75	15373	AHEVSEISVRTVYPPEE	3125.12		0	1	0	0	1	0
1269.5	4	180417_05_HCD	39.8	15400	AHEVSEISVRTVYPPEE	3133.04		0	1	0	0	1	0
1269.52	4	180417_05_HCD	40.2	15599	AHEVSEISVRTVYPPEE	3133.1		0	1	0	0	1	0
1280.35	5	180417_05_HCD	42.617	16832	AHEVSEISVRTVYPPEE	4455.77		0	1	0	0	1	0
1102.7	4	180417_05_HCD	41.25	16143	AHEVSEISVRTVYPPEEETGER	1893.56		0	1	0	1	1	0
1102.97	4	180417_05_HCD	42.533	16799	AHEVSEISVRTVYPPEEETGER	1894.66	HexNAc2Hex2NeuAc4	0	1	0	1	1	0
1102.98	4	180417_05_HCD	43.25	17165	AHEVSEISVRTVYPPEEETGER	1894.67		0	1	0	1	1	0
1102.98	4	180417_05_HCD	42.017	16536	AHEVSEISVRTVYPPEEETGER	1894.67		0	1	0	1	1	0
1103.22	4	180417_05_HCD	41.4	16223	AHEVSEISVRTVYPPEEETGER	1895.65		0	1	0	1	1	0
882.78	5	180417_05_HCD	42.65	16851	AHEVSEISVRTVYPPEEETGER	1895.66		0	1	0	1	1	0
1470.63	3	180417_05_HCD	43.017	17036	AHEVSEISVRTVYPPEEETGER	1895.67		0	1	0	1	1	0
882.977	5	180417_05_HCD	42.35	16705	AHEVSEISVRTVYPPEEETGER	1896.65		0	1	0	1	1	0
1103.47	4	180417_05_HCD	41.067	16048	AHEVSEISVRTVYPPEEETGER	1896.66		0	1	0	1	1	0
883.178	5	180417_05_HCD	43	17029	AHEVSEISVRTVYPPEEETGER	1897.65		0	1	0	1	1	0
943.761	3	180417_05_HCD	45.583	18354	ALSPQQVTRLPSGY	1312.46	HexNAc2Hex2NeuAc2	0	0	1	0	0	1
943.762	3	180417_05_HCD	44.583	17857	ALSPQQVTRLPSGY	1312.46	HexNAc2Hex2NeuAc2	0	0	1	0	0	1
1040.5	3	180417_05_HCD	44.633	17881	ALSPQQVTRLPSGY	1602.68		0	0	1	0	0	1
1040.79	3	180417_05_HCD	43.917	17510	ALSPQQVTRLPSGY	1603.55	HexNAc2Hex2NeuAc3	0	0	1	0	0	1
1040.8	3	180417_05_HCD	44.533	17826	ALSPQQVTRLPSGY	1603.56	HexNAc2Hex2NeuAc3	0	0	1	0	0	1
1065.48	3	180417_05_HCD	43.467	17284	ALSPQQVTRLPSGY	1677.61	HexNAc3Hex3NeuAc2	0	0	1	0	0	1
1162.51	3	180417_05_HCD	43.617	17361	ALSPQQVTRLPSGY	1968.7	HexNAc3Hex3NeuAc3	0	0	1	0	0	1
854.361	3	180417_05_HCD	50.25	20714	AQDGGPVGTELF	1370.5	HexNAc3Hex2FucNeuAc	0	0	1	0	0	1
1260.28	4	180417_05_HCD	50.133	20649	AQDGGPVGTELF	3847.51		0	0	1	0	0	1
906.395	3	180417_05_HCD	43.733	17422	AQDGGPVGTELFR	1370.5	HexNAc3Hex2FucNeuAc	0	0	1	0	0	1
765.996	3	180417_05_HCD	45.033	18085	ATAPTAQAPR	1312.45	HexNAc2Hex2NeuAc2	0	0	1	0	0	1
766	3	180417_05_HCD	23.15	6988	ATAPTAQAPR	1312.46	HexNAc2Hex2NeuAc2	0	0	1	0	0	1
766	3	180417_05_HCD	22.633	6707	ATAPTAQAPR	1312.46	HexNAc2Hex2NeuAc2	0	0	1	0	0	1
766.331	3	180417_05_HCD	45.233	18169	ATAPTAQAPR	1313.45		0	0	1	0	0	1
773.328	3	180417_05_HCD	22.75	6780	ATAPTAQAPR	1334.44	HexNAc2Hex2NeuAc2+Cation:Na	0	0	1	0	0	1
863.026	3	180417_05_HCD	45.3	18203	ATAPTAQAPR	1603.54	HexNAc2Hex2NeuAc3	0	0	1	0	0	1
863.365	3	180417_05_HCD	45.267	18190	ATAPTAQAPR	1604.55		0	0	1	0	0	1
921.394	3	180417_05_HCD	22.85	6827	ATAPTAQAPR	1778.64		0	0	1	0	0	1
960.399	3	180417_05_HCD	46.183	18674	ATAPTAQAPR	1895.65		0	0	1	0	0	1
964.42	3	180417_05_HCD	45.95	18540	ATAPTAQAPR	1907.72		0	0	1	0	0	1
1082.47	3	180417_05_HCD	44.45	17787	ATAPTAQAPR	2261.86		0	0	1	0	0	1
1439.27	3	180417_05_HCD	46.533	18834	ATAPTAQAPR	3332.28		0	0	1	0	0	1
624.949	3	180417_05_HCD	31.867	11428	AVAVTLQSH	947.323	HexNAcHexNeuAc2	0	0	1	0	0	1
624.949	3	180417_05_HCD	32.4	11675	AVAVTLQSH	947.323	HexNAcHexNeuAc2	0	0	1	0	0	1
735.985	3	180417_05_HCD	34.633	12816	AVAVTLQSH	1280.43	HexNAcHexNeuAc2NeuAcAc	0	0	1	0	0	1
746.66	3	180417_05_HCD	31.133	11087	AVAVTLQSH	1312.46	HexNAc2Hex2NeuAc2	0	0	1	0	0	1
749.988	3	180417_05_HCD	36.7	13881	AVAVTLQSH	1322.44	HexNAcHexNeuAcNeuAcAc2	0	0	1	0	0	1
749.989	3	180417_05_HCD	42.167	16608	AVAVTLQSH	1322.44	HexNAcHexNeuAcNeuAcAc2	0	0	1	0	0	1
749.989	3	180417_05_HCD	42.7	16875	AVAVTLQSH	1322.44	HexNAcHexNeuAcNeuAcAc2	0	0	1	0	0	1
760.664	3	180417_05_HCD	32.95	11933	AVAVTLQSH	1354.47	HexNAc2Hex2NeuAcNeuAcAc	0	0	1	0	0	1
760.665	3	180417_05_HCD	31.633	11324	AVAVTLQSH	1354.47	HexNAc2Hex2NeuAcNeuAcAc	0	0	1	0	0	1
760.665	3	180417_05_HCD	39.85	15423	AVAVTLQSH	1354.47	HexNAc2Hex2NeuAcNeuAcAc	0	0	1	0	0	1
760.665	3	180417_05_HCD	39.3	15148	AVAVTLQSH	1354.47	HexNAc2Hex2NeuAcNeuAcAc	0	0	1	0	0	1
766.008	3	180417_05_HCD	27.683	9395	AVAVTLQSH	1370.5	HexNAc3Hex2FucNeuAc	0	0	1	0	0	1
767.991	3	180417_05_HCD	33.133	12028	AVAVTLQSH	1376.45	HexNAc2Hex2NeuAcNeuAcAc+Cation:Na	0	0	1	0	0	1
774.667	3	180417_05_HCD	39.267	15134	AVAVTLQSH	1396.48	HexNAc2Hex2NeuAcAc2	0	0	1	0	0	1
774.668	3	180417_05_HCD	41.083	16053	AVAVTLQSH	1396.48	HexNAc2Hex2NeuAcAc2	0	0	1	0	0	1
774.668	3	180417_05_HCD	40.55	15777	AVAVTLQSH	1396.48	HexNAc2Hex2NeuAcAc2	0	0	1	0	0	1
774.668	3	180417_05_HCD	39.817	15406	AVAVTLQSH	1396.48	HexNAc2Hex2NeuAcAc2	0	0	1	0	0	1
774.669	3	180417_05_HCD	35.183	13104	AVAVTLQSH	1396.48	HexNAc2Hex2NeuAcAc2	0	0	1	0	0	1
781.995	3	180417_05_HCD	40.733	15872	AVAVTLQSH	1418.46	HexNAc2Hex2NeuAcAc2+Cation:Na	0	0	1	0	0	1
795.346	3	180417_05_HCD	30.367	10744	AVAVTLQSH	1458.51	HexNAc2Hex2FucNeuAc2	0	0	1	0	0	1
809.347	3	180417_05_HCD	33.017	11971	AVAVTLQSH	1500.52	HexNAc2Hex2FucNeuAcNeuAcAc	0	0	1	0	0	1
809.349	3	180417_05_HCD	31.683	11340	AVAVTLQSH	1500.52	HexNAc2Hex2FucNeuAcNeuAcAc	0	0	1	0	0	1
812.36	3	180417_05_HCD	40.433	15724	AVAVTLQSH	1509.56		0	0	1	0	0	1
814.348	3	180417_05_HCD	28.917	10057	AVAVTLQSH	1515.52	HexNAc3Hex2NeuAc2	0	0	1	0	0	1
823.354	3	180417_05_HCD	34.017	12481	AVAVTLQSH	1542.54		0	0	1	0	0	1
823.354	3	180417_05_HCD	38.633	14817	AVAVTLQSH	1542.54		0	0	1	0	0	1
823.354	3	180417_05_HCD	39.45	15228	AVAVTLQSH	1542.54		0	0	1	0	0	1
823.354	3	180417_05_HCD	39.983	15486	AVAVTLQSH	1542.54		0	0	1	0	0	1
957.37	3	180417_05_HCD	40.617	15811	AVAVTLQSH	1944.58		0	0	1	0	0	1
980.079	3	180417_05_HCD	37.767	14396	AVAVTLQSH	2012.71		0	0	1	0	0	1
985.422	3	180417_05_HCD	28.6	9885	AVAVTLQSH	2028.74		0	0	1	0	0	1
1067.41	3	180417_05_HCD	34.05	12500	AVAVTLQSH	2274.71		0	0	1	0	0	1
1087.11	3	180417_05_HCD	28.717	9948	AVAVTLQSH	2333.82	HexNAc4Hex4NeuAc3	0	0	1	0	0	1
1095.11	3	180417_05_HCD	26.4	8729	AVAVTLQSH	2357.8		0	0	1	0	0	1
1120.12	3	180417_05_HCD	32.05	11516	AVAVTLQSH	2432.83		0	0	1	0	0	1
1120.78	3	180417_05_HCD	31.367	11205	AVAVTLQSH	2434.81		0	0	1	0	0	1
1120.78	3	180417_05_HCD	31.433	11234	AVAVTLQSH	2434.81		0	0	1	0	0	1
1124.45	3	180417_05_HCD	40.617	15806	AVAVTLQSH	2445.84		0	0	1	0	0	1
1124.47	3	180417_05_HCD	40.717	15866	AVAVTLQSH	2445.89		0	0	1	0	0	1
1125.48	3	180417_05_HCD	36.567	13811	AVAVTLQSH	2448.92		0	0	1	0	0	1
1128.1	3	180417_05_HCD	31.35	11195	AVAVTLQSH	2456.77		0	0	1	0	0	1
1150.14	3	180417_05_HCD	27.95	9539	AVAVTLQSH	2522.9		0	0	1	0	0	1
1160.46	3	180417_05_HCD	32.967	11942	AVAVTLQSH	2553.87		0	0	1	0	0	1
1160.79	3	180417_05_HCD	42.083	16567	AVAVTLQSH	2554.83		0	0	1	0	0	1
1161.11	3	180417_05_HCD	42.233	16647	AVAVTLQSH	2555.81		0	0	1	0	0	1
1161.44	3	180417_05_HCD	28.767	9965	AVAVTLQSH	2556.79		0	0	1	0	0	1
1212.77	3	180417_05_HCD	32.883	11894	AVAVTLQSH	2710.78		0	0	1	0	0	1
914.376	4	180417_05_HCD	39.517	15260	AVAVTLQSH	2728.97		0	0	1	0	0	1
914.386	4	180417_05_HCD	39.683	15343	AVAVTLQSH	2729.01		0	0	1	0	0	1
1240.53	3	180417_05_HCD	45.567	18352	AVAVTLQSH	2794.08		0	0	1	0	0	1
1263.82	3	180417_05_HCD	31.6	11304	AVAVTLQSH	2863.95	HexNAc3Hex3NeuAc6+Cation:Na	0	0	1	0	0	1
1264.15	3	180417_05_HCD	31.95	11459	AVAVTLQSH	2864.92		0	0	1	0	0	1
957.385	4	180417_05_HCD	36.85	13948	AVAVTLQSH	2901.01		0	0	1	0	0	1
1424.28	3	180417_05_HCD	32.05	11510	AVAVTLQSH	3345.32		0	0	1	0	0	1
1424.63	3	180417_05_HCD	32.167	11565	AVAVTLQSH	3346.37		0	0	1	0	0	1
1431.55	3	180417_05_HCD	33.633	12288	AVAVTLQSH	3367.11		0	0	1	0	0	1
1093.45	4	180417_05_HCD	27.717	9410	AVAVTLQSH	3445.26		0	0	1	0	0	1
1103.47	4	180417_05_HCD	41.067	16048	AVAVTLQSH	3485.36		0	0	1	0	0	1
1103.98	4	180417_05_HCD	41.05	16034	AVAVTLQSH	3487.37		0	0	1	0	0	1
1124.48	4	180417_05_HCD	42.183	16620	AVAVTLQSH	3569.39		0	0	1	0	0	1
1126.48	4	180417_05_HCD	42.117	16583	AVAVTLQSH	3577.39		0	0	1	0	0	1
1127.46	4	180417_05_HCD	32.333	11639	AVAVTLQSH	3581.3		0	0	1	0	0	1
1135.93	4	180417_05_HCD	28.45	9815	AVAVTLQSH	3615.21		0	0	1	0	0	1
1136.19	4	180417_05_HCD	28.883	10032	AVAVTLQSH	3616.23		0	0	1	0	0	1
1140.99	4	180417_05_HCD	39.15	15076	AVAVTLQSH	3635.45		0	0	1	0	0	1
1525.59	3	180417_05_HCD	28.1	9621	AVAVTLQSH	3649.25		0	0	1	0	0	1
1149.45	4	180417_05_HCD	28.383	9775	AVAVTLQSH	3669.28		0	0	1	0	0	1
1183.01	4	180417_05_HCD	41.4	16217	AVAVTLQSH	3803.52		0	0	1	0	0	1
1214.51	4	180417_05_HCD	32.383	11664	AVAVTLQSH	3929.53		0	0	1	0	0	1
1235.51	4	180417_05_HCD	34.4	12693	AVAVTLQSH	4013.53		0	0	1	0	0	1
1235.53	4	180417_05_HCD	39.217	15105	AVAVTLQSH	4013.59		0	0	1	0	0	1
1235.54	4	180417_05_HCD	38.4	14703	AVAVTLQSH	4013.62		0	0	1	0	0	1
1236.04	4	180417_05_HCD	38.95	14972	AVAVTLQSH	4015.64		0	0	1	0	0	1
1253.98	4	180417_05_HCD	40.133	15568	AVAVTLQSH	4087.41		0	0	1	0	0	1
1066.87	5	180417_05_HCD	39.417	15209	AVAVTLQSH	4404.79		0	0	1	0	0	1
1124.48	5	180417_05_HCD	44.05	17581	AVAVTLQSH	4692.84		0	0	1	0	0	1
1420.06	4	180417_05_HCD	35	13005	AVAVTLQSH	4751.7		0	0	1	0	0	1
1448.59	4	180417_05_HCD	31.267	11152	AVAVTLQSH	4865.81		0	0	1	0	0	1
675.32	4	180417_05_HCD	33.017	11966	DALPDNENKKPTAIPK	947.324	HexNAcHexNeuAc2	0	1	0	0	1	0
624.6	3	180417_05_HCD	48.117	19642	DFTAAFPR	947.328	HexNAcHexNeuAc2	0	0	1	0	0	1
770.989	3	180417_05_HCD	44.367	17746	DFTAAFPR	1386.5	HexNAc3Hex3NeuAc	0	0	1	0	0	1
770.99	3	180417_05_HCD	43.85	17477	DFTAAFPR	1386.5	HexNAc3Hex3NeuAc	0	0	1	0	0	1
778.324	3	180417_05_HCD	44.183	17651	DFTAAFPR	1408.5		0	0	1	0	0	1
868.021	3	180417_05_HCD	45.3	18200	DFTAAFPR	1677.59	HexNAc3Hex3NeuAc2	0	0	1	0	0	1
868.021	3	180417_05_HCD	45.817	18472	DFTAAFPR	1677.59	HexNAc3Hex3NeuAc2	0	0	1	0	0	1
892.696	3	180417_05_HCD	43.15	17106	DFTAAFPR	1751.62	HexNAc4Hex4NeuAc	0	0	1	0	0	1
989.732	3	180417_05_HCD	44.833	17983	DFTAAFPR	2042.72	HexNAc4Hex4NeuAc2	0	0	1	0	0	1
989.735	3	180417_05_HCD	44.283	17698	DFTAAFPR	2042.73	HexNAc4Hex4NeuAc2	0	0	1	0	0	1
973.647	5	180417_05_HCD	44	17548	DFTAAFPR	3939.75		0	0	1	0	0	1

## Sheet: 7_2_20ppm
m/z	z	Fraction	RT	MSMS Info	Peptide	Mod Mass	Possible Mods	Y0, z=3	Y0, z=2	Y0, z=1	Y1, z=3	Y1, z=2	Y1, z=1
1290.54	3	180417_05_HCD	44.6	17868	AHEVSEISVRTVYPP	2185.75		0	1	0	0	1	0
957.928	4	180417_05_HCD	42.517	16791	AHEVSEISVRTVYPPEE	1886.73		0	1	0	0	1	0
959.905	4	180417_05_HCD	43.083	17075	AHEVSEISVRTVYPPEE	1894.64	HexNAc2Hex2NeuAc4	0	1	0	0	1	0
959.907	4	180417_05_HCD	43.633	17372	AHEVSEISVRTVYPPEE	1894.65	HexNAc2Hex2NeuAc4	0	1	0	0	1	0
1279.54	3	180417_05_HCD	42.983	17018	AHEVSEISVRTVYPPEE	1894.65	HexNAc2Hex2NeuAc4	0	1	0	0	1	0
959.907	4	180417_05_HCD	44.167	17640	AHEVSEISVRTVYPPEE	1894.65	HexNAc2Hex2NeuAc4	0	1	0	0	1	0
1279.54	3	180417_05_HCD	43.65	17387	AHEVSEISVRTVYPPEE	1894.66	HexNAc2Hex2NeuAc4	0	1	0	0	1	0
1279.54	3	180417_05_HCD	44.25	17682	AHEVSEISVRTVYPPEE	1894.66	HexNAc2Hex2NeuAc4	0	1	0	0	1	0
1279.56	3	180417_05_HCD	43.25	17161	AHEVSEISVRTVYPPEE	1894.7		0	1	0	0	1	0
1279.87	3	180417_05_HCD	44.333	17727	AHEVSEISVRTVYPPEE	1895.64		0	1	0	0	1	0
960.159	4	180417_05_HCD	42.867	16958	AHEVSEISVRTVYPPEE	1895.66		0	1	0	0	1	0
1031.67	4	180417_05_HCD	44.083	17596	AHEVSEISVRTVYPPEE	2181.7		0	1	0	0	1	0
1032.68	4	180417_05_HCD	43.45	17272	AHEVSEISVRTVYPPEE	2185.74		0	1	0	0	1	0
1196.72	4	180417_05_HCD	40.717	15863	AHEVSEISVRTVYPPEE	2841.91		0	1	0	0	1	0
1280.35	5	180417_05_HCD	42.617	16832	AHEVSEISVRTVYPPEE	4455.77		0	1	0	0	1	0
1102.7	4	180417_05_HCD	41.25	16143	AHEVSEISVRTVYPPEEETGER	1893.56		0	1	0	1	1	0
1102.97	4	180417_05_HCD	42.533	16799	AHEVSEISVRTVYPPEEETGER	1894.66	HexNAc2Hex2NeuAc4	0	1	0	0	1	0
1102.98	4	180417_05_HCD	42.017	16536	AHEVSEISVRTVYPPEEETGER	1894.67		0	1	0	1	1	0
882.78	5	180417_05_HCD	42.65	16851	AHEVSEISVRTVYPPEEETGER	1895.66		0	1	0	1	1	0
882.977	5	180417_05_HCD	42.35	16705	AHEVSEISVRTVYPPEEETGER	1896.65		0	1	0	0	1	0
883.178	5	180417_05_HCD	43	17029	AHEVSEISVRTVYPPEEETGER	1897.65		0	1	0	1	1	0
943.761	3	180417_05_HCD	45.583	18354	ALSPQQVTRLPSGY	1312.46	HexNAc2Hex2NeuAc2	0	0	1	0	0	1
943.762	3	180417_05_HCD	44.583	17857	ALSPQQVTRLPSGY	1312.46	HexNAc2Hex2NeuAc2	0	0	1	0	0	1
1040.5	3	180417_05_HCD	44.633	17881	ALSPQQVTRLPSGY	1602.68		0	0	1	0	0	1
1040.79	3	180417_05_HCD	43.917	17510	ALSPQQVTRLPSGY	1603.55	HexNAc2Hex2NeuAc3	0	0	1	0	0	1
1040.8	3	180417_05_HCD	44.533	17826	ALSPQQVTRLPSGY	1603.56	HexNAc2Hex2NeuAc3	0	0	1	0	0	1
1065.48	3	180417_05_HCD	43.467	17284	ALSPQQVTRLPSGY	1677.61	HexNAc3Hex3NeuAc2	0	0	1	0	0	1
1162.51	3	180417_05_HCD	43.617	17361	ALSPQQVTRLPSGY	1968.7	HexNAc3Hex3NeuAc3	0	0	1	0	0	1
854.361	3	180417_05_HCD	50.25	20714	AQDGGPVGTELF	1370.5	HexNAc3Hex2FucNeuAc	0	0	1	0	0	1
906.395	3	180417_05_HCD	43.733	17422	AQDGGPVGTELFR	1370.5	HexNAc3Hex2FucNeuAc	0	0	1	0	0	1
765.996	3	180417_05_HCD	45.033	18085	ATAPTAQAPR	1312.45	HexNAc2Hex2NeuAc2	0	0	1	0	0	1
766	3	180417_05_HCD	23.15	6988	ATAPTAQAPR	1312.46	HexNAc2Hex2NeuAc2	0	0	1	0	0	1
766	3	180417_05_HCD	22.633	6707	ATAPTAQAPR	1312.46	HexNAc2Hex2NeuAc2	0	0	1	0	0	1
766.331	3	180417_05_HCD	45.233	18169	ATAPTAQAPR	1313.45		0	0	1	0	0	1
863.026	3	180417_05_HCD	45.3	18203	ATAPTAQAPR	1603.54	HexNAc2Hex2NeuAc3	0	0	1	0	0	1
863.365	3	180417_05_HCD	45.267	18190	ATAPTAQAPR	1604.55		0	0	1	0	0	1
960.399	3	180417_05_HCD	46.183	18674	ATAPTAQAPR	1895.65		0	0	1	0	0	1
1439.27	3	180417_05_HCD	46.533	18834	ATAPTAQAPR	3332.28		0	0	1	0	0	1
624.949	3	180417_05_HCD	31.867	11428	AVAVTLQSH	947.323	HexNAcHexNeuAc2	0	0	1	0	0	1
624.949	3	180417_05_HCD	32.4	11675	AVAVTLQSH	947.323	HexNAcHexNeuAc2	0	0	1	0	0	1
735.985	3	180417_05_HCD	34.633	12816	AVAVTLQSH	1280.43	HexNAcHexNeuAc2NeuAcAc	0	0	1	0	0	1
746.66	3	180417_05_HCD	31.133	11087	AVAVTLQSH	1312.46	HexNAc2Hex2NeuAc2	0	0	1	0	0	1
749.988	3	180417_05_HCD	36.7	13881	AVAVTLQSH	1322.44	HexNAcHexNeuAcNeuAcAc2	0	0	1	0	0	1
760.664	3	180417_05_HCD	32.95	11933	AVAVTLQSH	1354.47	HexNAc2Hex2NeuAcNeuAcAc	0	0	1	0	0	1
760.665	3	180417_05_HCD	31.633	11324	AVAVTLQSH	1354.47	HexNAc2Hex2NeuAcNeuAcAc	0	0	1	0	0	1
760.665	3	180417_05_HCD	39.85	15423	AVAVTLQSH	1354.47	HexNAc2Hex2NeuAcNeuAcAc	0	0	1	0	0	1
760.665	3	180417_05_HCD	39.3	15148	AVAVTLQSH	1354.47	HexNAc2Hex2NeuAcNeuAcAc	0	0	1	0	0	1
766.008	3	180417_05_HCD	27.683	9395	AVAVTLQSH	1370.5	HexNAc3Hex2FucNeuAc	0	0	1	0	0	1
774.667	3	180417_05_HCD	39.267	15134	AVAVTLQSH	1396.48	HexNAc2Hex2NeuAcAc2	0	0	1	0	0	1
774.668	3	180417_05_HCD	41.083	16053	AVAVTLQSH	1396.48	HexNAc2Hex2NeuAcAc2	0	0	1	0	0	1
774.668	3	180417_05_HCD	40.55	15777	AVAVTLQSH	1396.48	HexNAc2Hex2NeuAcAc2	0	0	1	0	0	1
774.668	3	180417_05_HCD	39.817	15406	AVAVTLQSH	1396.48	HexNAc2Hex2NeuAcAc2	0	0	1	0	0	1
774.669	3	180417_05_HCD	35.183	13104	AVAVTLQSH	1396.48	HexNAc2Hex2NeuAcAc2	0	0	1	0	0	1
795.346	3	180417_05_HCD	30.367	10744	AVAVTLQSH	1458.51	HexNAc2Hex2FucNeuAc2	0	0	1	0	0	1
809.347	3	180417_05_HCD	33.017	11971	AVAVTLQSH	1500.52	HexNAc2Hex2FucNeuAcNeuAcAc	0	0	1	0	0	1
809.349	3	180417_05_HCD	31.683	11340	AVAVTLQSH	1500.52	HexNAc2Hex2FucNeuAcNeuAcAc	0	0	1	0	0	1
823.354	3	180417_05_HCD	34.017	12481	AVAVTLQSH	1542.54		0	0	1	0	0	1
823.354	3	180417_05_HCD	39.45	15228	AVAVTLQSH	1542.54		0	0	1	0	0	1
823.354	3	180417_05_HCD	39.983	15486	AVAVTLQSH	1542.54		0	0	1	0	0	1
957.37	3	180417_05_HCD	40.617	15811	AVAVTLQSH	1944.58		0	0	1	0	0	1
980.079	3	180417_05_HCD	37.767	14396	AVAVTLQSH	2012.71		0	0	1	0	0	1
1067.41	3	180417_05_HCD	34.05	12500	AVAVTLQSH	2274.71		0	0	1	0	0	1
1087.11	3	180417_05_HCD	28.717	9948	AVAVTLQSH	2333.82	HexNAc4Hex4NeuAc3	0	0	1	0	0	1
1095.11	3	180417_05_HCD	26.4	8729	AVAVTLQSH	2357.8		0	0	1	0	0	1
1120.12	3	180417_05_HCD	32.05	11516	AVAVTLQSH	2432.83		0	0	1	0	0	1
1120.78	3	180417_05_HCD	31.367	11205	AVAVTLQSH	2434.81		0	0	1	0	0	1
1120.78	3	180417_05_HCD	31.433	11234	AVAVTLQSH	2434.81		0	0	1	0	0	1
1124.47	3	180417_05_HCD	40.717	15866	AVAVTLQSH	2445.89		0	0	1	0	0	1
1125.48	3	180417_05_HCD	36.567	13811	AVAVTLQSH	2448.92		0	0	1	0	0	1
1128.1	3	180417_05_HCD	31.35	11195	AVAVTLQSH	2456.77		0	0	1	0	0	1
1212.77	3	180417_05_HCD	32.883	11894	AVAVTLQSH	2710.78		0	0	1	0	0	1
914.386	4	180417_05_HCD	39.683	15343	AVAVTLQSH	2729.01		0	0	1	0	0	1
1240.53	3	180417_05_HCD	45.567	18352	AVAVTLQSH	2794.08		0	0	1	0	0	1
1263.82	3	180417_05_HCD	31.6	11304	AVAVTLQSH	2863.95	HexNAc3Hex3NeuAc6+Cation:Na	0	0	1	0	0	1
957.385	4	180417_05_HCD	36.85	13948	AVAVTLQSH	2901.01		0	0	1	0	0	1
1424.28	3	180417_05_HCD	32.05	11510	AVAVTLQSH	3345.32		0	0	1	0	0	1
1431.55	3	180417_05_HCD	33.633	12288	AVAVTLQSH	3367.11		0	0	1	0	0	1
1093.45	4	180417_05_HCD	27.717	9410	AVAVTLQSH	3445.26		0	0	1	0	0	1
1103.47	4	180417_05_HCD	41.067	16048	AVAVTLQSH	3485.36		0	0	1	0	0	1
1103.98	4	180417_05_HCD	41.05	16034	AVAVTLQSH	3487.37		0	0	1	0	0	1
1124.48	4	180417_05_HCD	42.183	16620	AVAVTLQSH	3569.39		0	0	1	0	0	1
1135.93	4	180417_05_HCD	28.45	9815	AVAVTLQSH	3615.21		0	0	1	0	0	1
1136.19	4	180417_05_HCD	28.883	10032	AVAVTLQSH	3616.23		0	0	1	0	0	1
1140.99	4	180417_05_HCD	39.15	15076	AVAVTLQSH	3635.45		0	0	1	0	0	1
1149.45	4	180417_05_HCD	28.383	9775	AVAVTLQSH	3669.28		0	0	1	0	0	1
1183.01	4	180417_05_HCD	41.4	16217	AVAVTLQSH	3803.52		0	0	1	0	0	1
1235.51	4	180417_05_HCD	34.4	12693	AVAVTLQSH	4013.53		0	0	1	0	0	1
1235.54	4	180417_05_HCD	38.4	14703	AVAVTLQSH	4013.62		0	0	1	0	0	1
1420.06	4	180417_05_HCD	35	13005	AVAVTLQSH	4751.7		0	0	1	0	0	1
624.6	3	180417_05_HCD	48.117	19642	DFTAAFPR	947.328	HexNAcHexNeuAc2	0	0	1	0	0	1
770.989	3	180417_05_HCD	44.367	17746	DFTAAFPR	1386.5	HexNAc3Hex3NeuAc	0	0	1	0	0	1
770.99	3	180417_05_HCD	43.85	17477	DFTAAFPR	1386.5	HexNAc3Hex3NeuAc	0	0	1	0	0	1
868.021	3	180417_05_HCD	45.3	18200	DFTAAFPR	1677.59	HexNAc3Hex3NeuAc2	0	0	1	0	0	1
868.021	3	180417_05_HCD	45.817	18472	DFTAAFPR	1677.59	HexNAc3Hex3NeuAc2	0	0	1	0	0	1
973.647	5	180417_05_HCD	44	17548	DFTAAFPR	3939.75		0	0	1	0	0	1

## Sheet: 5_2_20ppm
m/z	z	Fraction	RT	MSMS Info	Peptide	Mod Mass	Possible Mods	Y0, z=3	Y0, z=2	Y0, z=1	Y1, z=3	Y1, z=2	Y1, z=1
957.928	4	180417_05_HCD	42.517	16791	AHEVSEISVRTVYPPEE	1886.73		0	1	0	0	1	0
959.905	4	180417_05_HCD	43.083	17075	AHEVSEISVRTVYPPEE	1894.64	HexNAc2Hex2NeuAc4	0	1	0	0	1	0
959.907	4	180417_05_HCD	43.633	17372	AHEVSEISVRTVYPPEE	1894.65	HexNAc2Hex2NeuAc4	0	1	0	0	1	0
1279.54	3	180417_05_HCD	42.983	17018	AHEVSEISVRTVYPPEE	1894.65	HexNAc2Hex2NeuAc4	0	1	0	0	1	0
959.907	4	180417_05_HCD	44.167	17640	AHEVSEISVRTVYPPEE	1894.65	HexNAc2Hex2NeuAc4	0	1	0	0	1	0
1279.54	3	180417_05_HCD	43.65	17387	AHEVSEISVRTVYPPEE	1894.66	HexNAc2Hex2NeuAc4	0	1	0	0	1	0
1279.54	3	180417_05_HCD	44.25	17682	AHEVSEISVRTVYPPEE	1894.66	HexNAc2Hex2NeuAc4	0	1	0	0	1	0
1279.56	3	180417_05_HCD	43.25	17161	AHEVSEISVRTVYPPEE	1894.7		0	1	0	0	1	0
1279.87	3	180417_05_HCD	44.333	17727	AHEVSEISVRTVYPPEE	1895.64		0	1	0	0	1	0
960.159	4	180417_05_HCD	42.867	16958	AHEVSEISVRTVYPPEE	1895.66		0	1	0	0	1	0
1031.67	4	180417_05_HCD	44.083	17596	AHEVSEISVRTVYPPEE	2181.7		0	1	0	0	1	0
1032.68	4	180417_05_HCD	43.45	17272	AHEVSEISVRTVYPPEE	2185.74		0	1	0	0	1	0
1280.35	5	180417_05_HCD	42.617	16832	AHEVSEISVRTVYPPEE	4455.77		0	1	0	0	1	0
1102.97	4	180417_05_HCD	42.533	16799	AHEVSEISVRTVYPPEEETGER	1894.66	HexNAc2Hex2NeuAc4	0	1	0	0	1	0
882.78	5	180417_05_HCD	42.65	16851	AHEVSEISVRTVYPPEEETGER	1895.66		0	1	0	0	1	0
883.178	5	180417_05_HCD	43	17029	AHEVSEISVRTVYPPEEETGER	1897.65		0	1	0	0	1	0
1040.5	3	180417_05_HCD	44.633	17881	ALSPQQVTRLPSGY	1602.68		0	0	1	0	0	1
1065.48	3	180417_05_HCD	43.467	17284	ALSPQQVTRLPSGY	1677.61	HexNAc3Hex3NeuAc2	0	0	1	0	0	1
906.395	3	180417_05_HCD	43.733	17422	AQDGGPVGTELFR	1370.5	HexNAc3Hex2FucNeuAc	0	0	1	0	0	1
765.996	3	180417_05_HCD	45.033	18085	ATAPTAQAPR	1312.45	HexNAc2Hex2NeuAc2	0	0	1	0	0	1
766	3	180417_05_HCD	23.15	6988	ATAPTAQAPR	1312.46	HexNAc2Hex2NeuAc2	0	0	1	0	0	1
766	3	180417_05_HCD	22.633	6707	ATAPTAQAPR	1312.46	HexNAc2Hex2NeuAc2	0	0	1	0	0	1
766.331	3	180417_05_HCD	45.233	18169	ATAPTAQAPR	1313.45		0	0	1	0	0	1
1439.27	3	180417_05_HCD	46.533	18834	ATAPTAQAPR	3332.28		0	0	1	0	0	1
624.949	3	180417_05_HCD	31.867	11428	AVAVTLQSH	947.323	HexNAcHexNeuAc2	0	0	1	0	0	1
624.949	3	180417_05_HCD	32.4	11675	AVAVTLQSH	947.323	HexNAcHexNeuAc2	0	0	1	0	0	1
735.985	3	180417_05_HCD	34.633	12816	AVAVTLQSH	1280.43	HexNAcHexNeuAc2NeuAcAc	0	0	1	0	0	1
746.66	3	180417_05_HCD	31.133	11087	AVAVTLQSH	1312.46	HexNAc2Hex2NeuAc2	0	0	1	0	0	1
760.664	3	180417_05_HCD	32.95	11933	AVAVTLQSH	1354.47	HexNAc2Hex2NeuAcNeuAcAc	0	0	1	0	0	1
760.665	3	180417_05_HCD	31.633	11324	AVAVTLQSH	1354.47	HexNAc2Hex2NeuAcNeuAcAc	0	0	1	0	0	1
760.665	3	180417_05_HCD	39.85	15423	AVAVTLQSH	1354.47	HexNAc2Hex2NeuAcNeuAcAc	0	0	1	0	0	1
760.665	3	180417_05_HCD	39.3	15148	AVAVTLQSH	1354.47	HexNAc2Hex2NeuAcNeuAcAc	0	0	1	0	0	1
766.008	3	180417_05_HCD	27.683	9395	AVAVTLQSH	1370.5	HexNAc3Hex2FucNeuAc	0	0	1	0	0	1
774.668	3	180417_05_HCD	41.083	16053	AVAVTLQSH	1396.48	HexNAc2Hex2NeuAcAc2	0	0	1	0	0	1
774.668	3	180417_05_HCD	40.55	15777	AVAVTLQSH	1396.48	HexNAc2Hex2NeuAcAc2	0	0	1	0	0	1
774.669	3	180417_05_HCD	35.183	13104	AVAVTLQSH	1396.48	HexNAc2Hex2NeuAcAc2	0	0	1	0	0	1
809.349	3	180417_05_HCD	31.683	11340	AVAVTLQSH	1500.52	HexNAc2Hex2FucNeuAcNeuAcAc	0	0	1	0	0	1
823.354	3	180417_05_HCD	34.017	12481	AVAVTLQSH	1542.54		0	0	1	0	0	1
823.354	3	180417_05_HCD	39.45	15228	AVAVTLQSH	1542.54		0	0	1	0	0	1
823.354	3	180417_05_HCD	39.983	15486	AVAVTLQSH	1542.54		0	0	1	0	0	1
957.37	3	180417_05_HCD	40.617	15811	AVAVTLQSH	1944.58		0	0	1	0	0	1
980.079	3	180417_05_HCD	37.767	14396	AVAVTLQSH	2012.71		0	0	1	0	0	1
1067.41	3	180417_05_HCD	34.05	12500	AVAVTLQSH	2274.71		0	0	1	0	0	1
1125.48	3	180417_05_HCD	36.567	13811	AVAVTLQSH	2448.92		0	0	1	0	0	1
1240.53	3	180417_05_HCD	45.567	18352	AVAVTLQSH	2794.08		0	0	1	0	0	1
1103.47	4	180417_05_HCD	41.067	16048	AVAVTLQSH	3485.36		0	0	1	0	0	1
1103.98	4	180417_05_HCD	41.05	16034	AVAVTLQSH	3487.37		0	0	1	0	0	1
1136.19	4	180417_05_HCD	28.883	10032	AVAVTLQSH	3616.23		0	0	1	0	0	1
1140.99	4	180417_05_HCD	39.15	15076	AVAVTLQSH	3635.45		0	0	1	0	0	1
1235.51	4	180417_05_HCD	34.4	12693	AVAVTLQSH	4013.53		0	0	1	0	0	1
1235.54	4	180417_05_HCD	38.4	14703	AVAVTLQSH	4013.62		0	0	1	0	0	1
624.6	3	180417_05_HCD	48.117	19642	DFTAAFPR	947.328	HexNAcHexNeuAc2	0	0	1	0	0	1
770.989	3	180417_05_HCD	44.367	17746	DFTAAFPR	1386.5	HexNAc3Hex3NeuAc	0	0	1	0	0	1
770.99	3	180417_05_HCD	43.85	17477	DFTAAFPR	1386.5	HexNAc3Hex3NeuAc	0	0	1	0	0	1

## Sheet: FiltervsSearch
The name in column A indicates how many of the most abundant peaks were considered in the MS-Filter process;
Searches are either one that considered the 3 the most common O-glycans (Search3Gly) or an extended glycan database with only one glycosylation per peptide (SearchAll).
Since the database searches were performed with EThcD data, their scan numbers are 1-3 higher than those of the corresponding HCD data
Method	m/z	z	Fraction	RT	MSMS Info	Peptide	Mod Mass	Possible Mods	site assignment with SLIP score	score	E-value
Filter05	766	3	180417_05_HCD	22.633	6707	ATAPTAQAPR	1312.46	HexNAc2Hex2NeuAc2
Search3Gly	766	3	180417_05_EThcD	22.633	6709	ATAPTAQAPR		AT(HexNAcHexNeuAc)APT(HexNAcHexNeuAc)AQAPR	HexNAcHexNeuAc@71=17;HexNAcHexNeuAc@74=17	23.1	1.5e-05
SearchAll	766	3	180417_05_EThcD	22.633	6709	ATAPTAQAPR		AT(HexNAc2Hex2NeuAc2)APTAQAPR	HexNAc2Hex2NeuAc2@71|74	17.9	0.019
Filter10	773.328	3	180417_05_HCD	22.75	6780	ATAPTAQAPR	1334.44	HexNAc2Hex2NeuAc2+Cation:Na
Filter10	921.394	3	180417_05_HCD	22.85	6827	ATAPTAQAPR	1778.64
Filter05	766	3	180417_05_HCD	23.15	6988	ATAPTAQAPR	1312.46	HexNAc2Hex2NeuAc2
Search3Gly	766	3	180417_05_EThcD	23.15	6990	ATAPTAQAPR		AT(HexNAcHexNeuAc)APT(HexNAcHexNeuAc)AQAPR	HexNAcHexNeuAc@71=24;HexNAcHexNeuAc@74=24	23.1	7.1e-05
Filter07	1095.11	3	180417_05_HCD	26.4	8729	AVAVTLQSH	2357.8
Filter05	766.008	3	180417_05_HCD	27.683	9395	AVAVTLQSH	1370.5	HexNAc3Hex2FucNeuAc
SearchAll	766.008	3	180417_05_EThcD	27.683	9397	AVAVTLQSH		AVAVT(HexNAc3Hex2FucNeuAc)LQSH	HexNAc3Hex2FucNeuAc@346=49	24.1	4.7e-06
Filter07	1093.45	4	180417_05_HCD	27.717	9410	AVAVTLQSH	3445.26
Filter10	1150.14	3	180417_05_HCD	27.95	9539	AVAVTLQSH	2522.9
Filter10	1525.59	3	180417_05_HCD	28.1	9621	AVAVTLQSH	3649.25
Filter07	1149.45	4	180417_05_HCD	28.383	9775	AVAVTLQSH	3669.28
Filter07	1135.93	4	180417_05_HCD	28.45	9815	AVAVTLQSH	3615.21
Filter15	1087.79	3	180417_05_HCD	28.467	9823	AVAVTLQSH	2335.84
Filter10	985.422	3	180417_05_HCD	28.6	9885	AVAVTLQSH	2028.74
Filter07	1087.11	3	180417_05_HCD	28.717	9948	AVAVTLQSH	2333.82	HexNAc4Hex4NeuAc3
Filter10	1161.44	3	180417_05_HCD	28.767	9965	AVAVTLQSH	2556.79
Filter05	1136.19	4	180417_05_HCD	28.883	10032	AVAVTLQSH	3616.23
Filter10	814.348	3	180417_05_HCD	28.917	10057	AVAVTLQSH	1515.52	HexNAc3Hex2NeuAc2
Filter15	1091.95	4	180417_05_HCD	28.95	10068	AVAVTLQSH	3439.26
Filter15	1221.53	4	180417_05_HCD	29.433	10328	AVAVTLQSH	3957.59
Filter07	795.346	3	180417_05_HCD	30.367	10744	AVAVTLQSH	1458.51	HexNAc2Hex2FucNeuAc2
SearchAll	795.346	3	180417_05_EThcD	30.383	10746	AVAVTLQSH		AVAVT(HexNAc2Hex2FucNeuAc2)LQSH	HexNAc2Hex2FucNeuAc2@346=40	15.4	0.0058
Filter05	746.66	3	180417_05_HCD	31.133	11087	AVAVTLQSH	1312.46	HexNAc2Hex2NeuAc2
Search3Gly	746.66	3	180417_05_EThcD	31.133	11090	AVAVTLQSH		AVAVT(HexNAc2Hex2NeuAc2)LQSH	HexNAc2Hex2NeuAc2@346=52	15.9	0.00034
Filter10	1448.59	4	180417_05_HCD	31.267	11152	AVAVTLQSH	4865.81
Filter07	1128.1	3	180417_05_HCD	31.35	11195	AVAVTLQSH	2456.77
Filter07	1120.78	3	180417_05_HCD	31.367	11205	AVAVTLQSH	2434.81
Filter07	1120.78	3	180417_05_HCD	31.433	11234	AVAVTLQSH	2434.81
Filter07	1263.82	3	180417_05_HCD	31.6	11304	AVAVTLQSH	2863.95	HexNAc3Hex3NeuAc6+Cation:Na
Filter05	760.665	3	180417_05_HCD	31.633	11324	AVAVTLQSH	1354.47	HexNAc2Hex2NeuAcNeuAcAc
SearchAll	760.665	3	180417_05_EThcD	31.633	11326	AVAVTLQSH		AVAVT(HexNAc2Hex2NeuAcNeuAcAc)LQSH	HexNAc2Hex2NeuAcNeuAcAc@346=42	18	0.0078
Filter15	1120.78	3	180417_05_HCD	31.65	11330	AVAVTLQSH	2434.81
Filter05	809.349	3	180417_05_HCD	31.683	11340	AVAVTLQSH	1500.52	HexNAc2Hex2FucNeuAcNeuAcAc
Filter15	1120.47	3	180417_05_HCD	31.817	11396	AVAVTLQSH	2433.88
Filter05	624.949	3	180417_05_HCD	31.867	11428	AVAVTLQSH	947.323	HexNAcHexNeuAc2
Search3Gly	624.949	3	180417_05_EThcD	31.883	11430	AVAVTLQSH		AVAVT(HexNAcHexNeuAc2)LQSH	HexNAcHexNeuAc2@346=56	31.9	4.1e-09
Filter10	1264.15	3	180417_05_HCD	31.95	11459	AVAVTLQSH	2864.92
Filter07	1424.28	3	180417_05_HCD	32.05	11510	AVAVTLQSH	3345.32
Filter07	1120.12	3	180417_05_HCD	32.05	11516	AVAVTLQSH	2432.83
Filter10	1424.63	3	180417_05_HCD	32.167	11565	AVAVTLQSH	3346.37
Filter10	1127.46	4	180417_05_HCD	32.333	11639	AVAVTLQSH	3581.3
Filter10	1214.51	4	180417_05_HCD	32.383	11664	AVAVTLQSH	3929.53
Filter05	624.949	3	180417_05_HCD	32.4	11675	AVAVTLQSH	947.323	HexNAcHexNeuAc2
Search3Gly	624.949	3	180417_05_EThcD	32.4	11676	AVAVTLQSH		AVAVT(HexNAcHexNeuAc2)LQSH	HexNAcHexNeuAc2@346=56	30.8	4.1e-09
Filter07	1212.77	3	180417_05_HCD	32.883	11894	AVAVTLQSH	2710.78
Filter05	760.664	3	180417_05_HCD	32.95	11933	AVAVTLQSH	1354.47	HexNAc2Hex2NeuAcNeuAcAc
SearchAll	760.664	3	180417_05_EThcD	32.95	11935	AVAVTLQSH		AVAVT(HexNAc2Hex2NeuAcNeuAcAc)LQSH	HexNAc2Hex2NeuAcNeuAcAc@346=51	18.4	0.00071
Filter10	1160.46	3	180417_05_HCD	32.967	11942	AVAVTLQSH	2553.87
Filter10	675.32	4	180417_05_HCD	33.017	11966	DALPDNENKKPTAIPK	947.324	HexNAcHexNeuAc2
Search3Gly	675.32	4	180417_05_EThcD	33.017	11968	DALPDNENKKPTAIPK		DALPDNENKKPT(HexNAcHexNeuAc2)AIPK	HexNAcHexNeuAc2@41	35.2	1.1e-06
Filter07	809.347	3	180417_05_HCD	33.017	11971	AVAVTLQSH	1500.52	HexNAc2Hex2FucNeuAcNeuAcAc
Filter10	767.991	3	180417_05_HCD	33.133	12028	AVAVTLQSH	1376.45	HexNAc2Hex2NeuAcNeuAcAc+Cation:Na
SearchAll	767.991	3	180417_05_EThcD	33.133	12030	AVAVTLQSH		AVAVT(HexNAc2Hex2NeuAcNeuAcAc+Cation:Na)LQSH	HexNAc2Hex2NeuAcNeuAcAc+Cation:Na@346=46	16.5	0.00081
Filter15	936.799	5	180417_05_HCD	33.55	12248	AVAVTLQSH	3754.46
Filter07	1431.55	3	180417_05_HCD	33.633	12288	AVAVTLQSH	3367.11
Filter15	936.597	5	180417_05_HCD	33.75	12345	AVAVTLQSH	3753.45
Filter05	823.354	3	180417_05_HCD	34.017	12481	AVAVTLQSH	1542.54
Filter05	1067.41	3	180417_05_HCD	34.05	12500	AVAVTLQSH	2274.71
Filter05	1235.51	4	180417_05_HCD	34.4	12693	AVAVTLQSH	4013.53
Filter05	735.985	3	180417_05_HCD	34.633	12816	AVAVTLQSH	1280.43	HexNAcHexNeuAc2NeuAcAc
SearchAll	735.985	3	180417_05_EThcD	34.65	12819	AVAVTLQSH		AVAVT(HexNAcHexNeuAc2NeuAcAc)LQSH	HexNAcHexNeuAc2NeuAcAc@346=47	23.8	0.00015
Filter15	1180.49	4	180417_05_HCD	34.85	12921	AVAVTLQSH	3793.41
Filter07	1420.06	4	180417_05_HCD	35	13005	AVAVTLQSH	4751.7
Filter05	774.669	3	180417_05_HCD	35.183	13104	AVAVTLQSH	1396.48	HexNAc2Hex2NeuAcAc2
SearchAll	774.669	3	180417_05_EThcD	35.2	13106	AVAVTLQSH		AVAVT(HexNAc2Hex2NeuAcAc2)LQSH	HexNAc2Hex2NeuAcAc2@346=44	23	0.0002
Filter05	1125.48	3	180417_05_HCD	36.567	13811	AVAVTLQSH	2448.92
Filter07	749.988	3	180417_05_HCD	36.7	13881	AVAVTLQSH	1322.44	HexNAcHexNeuAcNeuAcAc2
SearchAll	749.988	3	180417_05_EThcD	36.7	13884	AVAVTLQSH		AVAVT(HexNAcHexNeuAcNeuAcAc2)LQSH	HexNAcHexNeuAcNeuAcAc2@346=44	24.9	1.4e-05
Filter15	1162.5	4	180417_05_HCD	36.717	13887	AVAVTLQSH	3721.46
Filter07	957.385	4	180417_05_HCD	36.85	13948	AVAVTLQSH	2901.01
Filter05	980.079	3	180417_05_HCD	37.767	14396	AVAVTLQSH	2012.71
Filter05	1235.54	4	180417_05_HCD	38.4	14703	AVAVTLQSH	4013.62
Filter10	823.354	3	180417_05_HCD	38.633	14817	AVAVTLQSH	1542.54
Filter10	1236.04	4	180417_05_HCD	38.95	14972	AVAVTLQSH	4015.64
Filter05	1140.99	4	180417_05_HCD	39.15	15076	AVAVTLQSH	3635.45
Filter10	1235.53	4	180417_05_HCD	39.217	15105	AVAVTLQSH	4013.59
Filter07	774.667	3	180417_05_HCD	39.267	15134	AVAVTLQSH	1396.48	HexNAc2Hex2NeuAcAc2
Filter05	760.665	3	180417_05_HCD	39.3	15148	AVAVTLQSH	1354.47	HexNAc2Hex2NeuAcNeuAcAc
SearchAll	760.665	3	180417_05_EThcD	39.3	15150	AVAVTLQSH		AVAVT(HexNAc2Hex2NeuAcNeuAcAc)LQSH	HexNAc2Hex2NeuAcNeuAcAc@346=43	21.7	0.00026
Filter10	1066.87	5	180417_05_HCD	39.417	15209	AVAVTLQSH	4404.79
Filter05	823.354	3	180417_05_HCD	39.45	15228	AVAVTLQSH	1542.54
Filter10	1196.73	4	180417_05_HCD	39.483	15243	AHEVSEISVRTVYPPEE	2841.95	HexNAc3Hex3NeuAc6
Filter10	914.376	4	180417_05_HCD	39.517	15260	AVAVTLQSH	2728.97
Filter10	1196.99	4	180417_05_HCD	39.533	15268	AHEVSEISVRTVYPPEE	2842.98
Filter15	830.682	3	180417_05_HCD	39.65	15326	AVAVTLQSH	1564.52
Filter07	914.386	4	180417_05_HCD	39.683	15343	AVAVTLQSH	2729.01
Filter10	1267.52	4	180417_05_HCD	39.75	15373	AHEVSEISVRTVYPPEE	3125.12
Filter10	1269.5	4	180417_05_HCD	39.8	15400	AHEVSEISVRTVYPPEE	3133.04
Filter07	774.668	3	180417_05_HCD	39.817	15406	AVAVTLQSH	1396.48	HexNAc2Hex2NeuAcAc2
Filter05	760.665	3	180417_05_HCD	39.85	15423	AVAVTLQSH	1354.47	HexNAc2Hex2NeuAcNeuAcAc
Filter15	986.95	4	180417_05_HCD	39.9	15450	AVAVTLQSH	3019.27
Filter05	823.354	3	180417_05_HCD	39.983	15486	AVAVTLQSH	1542.54
Filter15	1256.03	4	180417_05_HCD	40	15495	AVAVTLQSH	4095.57
Filter15	638.953	3	180417_05_HCD	40.05	15527	AVAVTLQSH	989.334	HexNAcHexNeuAcNeuAcAc
SearchAll	638.953	3	180417_05_EThcD	40.067	15530	AVAVTLQSH		AVAVT(HexNAcHexNeuAcNeuAcAc)LQSH	HexNAcHexNeuAcNeuAcAc@346=49	28.6	1.5e-06
Filter10	1253.98	4	180417_05_HCD	40.133	15568	AVAVTLQSH	4087.41
Filter10	1269.52	4	180417_05_HCD	40.2	15599	AHEVSEISVRTVYPPEE	3133.1
Filter10	812.36	3	180417_05_HCD	40.433	15724	AVAVTLQSH	1509.56
Filter05	774.668	3	180417_05_HCD	40.55	15777	AVAVTLQSH	1396.48	HexNAc2Hex2NeuAcAc2
SearchAll	774.668	3	180417_05_EThcD	40.55	15780	AVAVTLQSH		AVAVT(HexNAc2Hex2NeuAcAc2)LQSH	HexNAc2Hex2NeuAcAc2@346=55	15.6	0.0058
Filter10	1124.45	3	180417_05_HCD	40.617	15806	AVAVTLQSH	2445.84
Filter05	957.37	3	180417_05_HCD	40.617	15811	AVAVTLQSH	1944.58
Filter07	1196.72	4	180417_05_HCD	40.717	15863	AHEVSEISVRTVYPPEE	2841.91
Filter07	1124.47	3	180417_05_HCD	40.717	15866	AVAVTLQSH	2445.89
Filter10	781.995	3	180417_05_HCD	40.733	15872	AVAVTLQSH	1418.46	HexNAc2Hex2NeuAcAc2+Cation:Na
Filter15	1234.5	4	180417_05_HCD	40.767	15888	AVAVTLQSH	4009.46
Filter15	1137.95	4	180417_05_HCD	40.8	15902	AHEVSEISVRTVYPP	2864.92
Filter10	1196.99	4	180417_05_HCD	40.8	15905	AHEVSEISVRTVYPPEE	2842.99
Filter15	1307.51	4	180417_05_HCD	40.867	15941	AVAVTLQSH	4301.51
Filter05	1103.98	4	180417_05_HCD	41.05	16034	AVAVTLQSH	3487.37
Filter05	1103.47	4	180417_05_HCD	41.067	16048	AVAVTLQSH	3485.36
Filter10	1103.47	4	180417_05_HCD	41.067	16048	AHEVSEISVRTVYPPEEETGER	1896.66
Filter05	774.668	3	180417_05_HCD	41.083	16053	AVAVTLQSH	1396.48	HexNAc2Hex2NeuAcAc2
SearchAll	774.668	3	180417_05_EThcD	41.083	16055	AVAVTLQSH		AVAVT(HexNAc2Hex2NeuAcAc2)LQSH	HexNAc2Hex2NeuAcAc2@346=40	18.3	0.0095
Filter07	1102.7	4	180417_05_HCD	41.25	16143	AHEVSEISVRTVYPPEEETGER	1893.56
Filter07	1183.01	4	180417_05_HCD	41.4	16217	AVAVTLQSH	3803.52
Filter10	1103.22	4	180417_05_HCD	41.4	16223	AHEVSEISVRTVYPPEEETGER	1895.65
Filter15	1498.63	3	180417_05_HCD	41.483	16265	AHEVSEISVRTVYPPEE	2551.91
Filter15	1019.07	3	180417_05_HCD	41.75	16401	AHEVSEISVRTVYPP	1371.33
Filter07	1102.98	4	180417_05_HCD	42.017	16536	AHEVSEISVRTVYPPEEETGER	1894.67
Filter10	1160.79	3	180417_05_HCD	42.083	16567	AVAVTLQSH	2554.83
Filter15	1176	4	180417_05_HCD	42.1	16576	AHEVSEISVRTVYPPEEETGER	2186.76
Filter10	1126.48	4	180417_05_HCD	42.117	16583	AVAVTLQSH	3577.39
Filter10	749.989	3	180417_05_HCD	42.167	16608	AVAVTLQSH	1322.44	HexNAcHexNeuAcNeuAcAc2
SearchAll	749.989	3	180417_05_EThcD	42.167	16610	AVAVTLQSH		AVAVT(HexNAcHexNeuAcNeuAcAc2)LQSH	HexNAcHexNeuAcNeuAcAc2@346=38	26.6	1.2e-05
Filter07	1124.48	4	180417_05_HCD	42.183	16620	AVAVTLQSH	3569.39
Filter10	1161.11	3	180417_05_HCD	42.233	16647	AVAVTLQSH	2555.81
Filter07	882.977	5	180417_05_HCD	42.35	16705	AHEVSEISVRTVYPPEEETGER	1896.65
Filter15	1160.77	3	180417_05_HCD	42.367	16714	AVAVTLQSH	2554.79
Filter15	1160.48	3	180417_05_HCD	42.4	16731	AVAVTLQSH	2553.92
Filter15	753.827	4	180417_05_HCD	42.467	16763	AVAVTLQSH	2086.78
Filter05	957.928	4	180417_05_HCD	42.517	16791	AHEVSEISVRTVYPPEE	1886.73
Filter05	1102.97	4	180417_05_HCD	42.533	16799	AHEVSEISVRTVYPPEEETGER	1894.66	HexNAc2Hex2NeuAc4
Search3Gly	1102.97	4	180417_05_EThcD	42.533	16801	AHEVSEISVRTVYPPEEETGER		AHEVS(HexNAcHexNeuAc2)EISVRT(HexNAcHexNeuAc2)VYPPEEETGER	HexNAcHexNeuAc2@63=10;HexNAcHexNeuAc2@69=8	27.9	3.5e-07
SearchAll	1102.97	4	180417_05_EThcD	42.533	16801	AHEVSEISVRTVYPPEEETGER		AHEVS(HexNAc2Hex2NeuAc4)EISVRTVYPPEEETGER	HexNAc2Hex2NeuAc4@63|66|69	22.7	0.00034
Filter05	1280.35	5	180417_05_HCD	42.617	16832	AHEVSEISVRTVYPPEE	4455.77
Filter05	882.78	5	180417_05_HCD	42.65	16851	AHEVSEISVRTVYPPEEETGER	1895.66
Filter10	749.989	3	180417_05_HCD	42.7	16875	AVAVTLQSH	1322.44	HexNAcHexNeuAcNeuAcAc2
SearchAll	749.989	3	180417_05_EThcD	42.7	16877	AVAVTLQSH		AVAVT(HexNAcHexNeuAcNeuAcAc2)LQSH	HexNAcHexNeuAcNeuAcAc2@346=39	19.9	0.00011
Filter15	941.193	5	180417_05_HCD	42.7	16880	AHEVSEISVRTVYPPEEETGER	2187.73
Filter15	1175.74	4	180417_05_HCD	42.767	16908	AHEVSEISVRTVYPPEEETGER	2185.73
Filter05	960.159	4	180417_05_HCD	42.867	16958	AHEVSEISVRTVYPPEE	1895.66
Filter10	1033.18	4	180417_05_HCD	42.917	16982	AHEVSEISVRTVYPPEE	2187.74
Filter05	1279.54	3	180417_05_HCD	42.983	17018	AHEVSEISVRTVYPPEE	1894.65	HexNAc2Hex2NeuAc4
Filter05	883.178	5	180417_05_HCD	43	17029	AHEVSEISVRTVYPPEEETGER	1897.65
Filter10	1470.63	3	180417_05_HCD	43.017	17036	AHEVSEISVRTVYPPEEETGER	1895.67
Filter05	959.905	4	180417_05_HCD	43.083	17075	AHEVSEISVRTVYPPEE	1894.64	HexNAc2Hex2NeuAc4
Filter10	892.696	3	180417_05_HCD	43.15	17106	DFTAAFPR	1751.62	HexNAc4Hex4NeuAc
Filter15	892.696	3	180417_05_HCD	43.15	17106	AQDGGPVGTELFR	1329.4
Filter05	1279.56	3	180417_05_HCD	43.25	17161	AHEVSEISVRTVYPPEE	1894.7
Filter10	1102.98	4	180417_05_HCD	43.25	17165	AHEVSEISVRTVYPPEEETGER	1894.67
Filter05	1032.68	4	180417_05_HCD	43.45	17272	AHEVSEISVRTVYPPEE	2185.74
Filter05	1065.48	3	180417_05_HCD	43.467	17284	ALSPQQVTRLPSGY	1677.61	HexNAc3Hex3NeuAc2
Filter07	1162.51	3	180417_05_HCD	43.617	17361	ALSPQQVTRLPSGY	1968.7	HexNAc3Hex3NeuAc3
Filter05	959.907	4	180417_05_HCD	43.633	17372	AHEVSEISVRTVYPPEE	1894.65	HexNAc2Hex2NeuAc4
Search3Gly	959.907	4	180417_05_EThcD	43.633	17374	AHEVSEISVRTVYPPEE		AHEVS(HexNAcHexNeuAc2)EISVRT(HexNAcHexNeuAc2)VYPPEE	HexNAcHexNeuAc2&HexNAcHexNeuAc2@((63&(66|69))|(66&69))	22.3	0.00038
SearchAll	959.907	4	180417_05_EThcD	43.633	17374	AHEVSEISVRTVYPPEE		AHEVSEIS(HexNAc2Hex2NeuAc4)VRTVYPPEE	HexNAc2Hex2NeuAc4@63|66|69	21.7	0.0096
Filter05	1279.54	3	180417_05_HCD	43.65	17387	AHEVSEISVRTVYPPEE	1894.66	HexNAc2Hex2NeuAc4
Filter15	1156.97	4	180417_05_HCD	43.683	17403	DFTAAFPR	3700.41
Filter05	906.395	3	180417_05_HCD	43.733	17422	AQDGGPVGTELFR	1370.5	HexNAc3Hex2FucNeuAc
SearchAll	906.395	3	180417_05_EThcD	43.733	17425	AQDGGPVGTELFR		AQDGGPVGT(HexNAc3Hex2FucNeuAc)ELFR	HexNAc3Hex2FucNeuAc@183	14	0.029
Filter05	770.99	3	180417_05_HCD	43.85	17477	DFTAAFPR	1386.5	HexNAc3Hex3NeuAc
SearchAll	770.99	3	180417_05_EThcD	43.85	17480	DFTAAFPR		DFT(HexNAc3Hex3NeuAc)AAFPR	HexNAc3Hex3NeuAc@145	22.5	0.00029
Filter07	1040.79	3	180417_05_HCD	43.917	17510	ALSPQQVTRLPSGY	1603.55	HexNAc2Hex2NeuAc3
Filter07	973.647	5	180417_05_HCD	44	17548	DFTAAFPR	3939.75
Filter15	1186.5	4	180417_05_HCD	44	17552	AHEVSEISVRTVYPPEEETGER	2228.75
Filter10	1124.48	5	180417_05_HCD	44.05	17581	AVAVTLQSH	4692.84
Filter15	895.634	4	180417_05_HCD	44.067	17588	AHEVSEISVRTVYPP	1895.64
Filter05	1031.67	4	180417_05_HCD	44.083	17596	AHEVSEISVRTVYPPEE	2181.7
Filter15	895.384	4	180417_05_HCD	44.1	17603	AHEVSEISVRTVYPP	1894.64	HexNAc2Hex2NeuAc4
Search3Gly	895.384	4	180417_05_EThcD	44.1	17604	AHEVSEISVRTVYPP		AHEVS(HexNAcHexNeuAc2)EISVRT(HexNAcHexNeuAc2)VYPP	HexNAcHexNeuAc2@63=25;HexNAcHexNeuAc2@69=24	24.1	2.1e-05
Filter05	959.907	4	180417_05_HCD	44.167	17640	AHEVSEISVRTVYPPEE	1894.65	HexNAc2Hex2NeuAc4
Filter10	778.324	3	180417_05_HCD	44.183	17651	DFTAAFPR	1408.5
Filter05	1279.54	3	180417_05_HCD	44.25	17682	AHEVSEISVRTVYPPEE	1894.66	HexNAc2Hex2NeuAc4
Filter10	989.735	3	180417_05_HCD	44.283	17698	DFTAAFPR	2042.73	HexNAc4Hex4NeuAc2
Filter05	1279.87	3	180417_05_HCD	44.333	17727	AHEVSEISVRTVYPPEE	1895.64
Filter05	770.989	3	180417_05_HCD	44.367	17746	DFTAAFPR	1386.5	HexNAc3Hex3NeuAc
SearchAll	770.989	3	180417_05_EThcD	44.383	17748	DFTAAFPR		DFT(HexNAc3Hex3NeuAc)AAFPR	HexNAc3Hex3NeuAc@145	16.7	0.00087
Filter15	1182.71	4	180417_05_HCD	44.433	17779	AHEVSEISVRTVYPPEE	2785.84
Filter10	1082.47	3	180417_05_HCD	44.45	17787	ATAPTAQAPR	2261.86
Filter15	1193.52	3	180417_05_HCD	44.5	17810	AHEVSEISVRTVYPP	1894.66	HexNAc2Hex2NeuAc4
Filter07	1040.8	3	180417_05_HCD	44.533	17826	ALSPQQVTRLPSGY	1603.56	HexNAc2Hex2NeuAc3
Filter07	943.762	3	180417_05_HCD	44.583	17857	ALSPQQVTRLPSGY	1312.46	HexNAc2Hex2NeuAc2
Filter07	1290.54	3	180417_05_HCD	44.6	17868	AHEVSEISVRTVYPP	2185.75
Filter05	1040.5	3	180417_05_HCD	44.633	17881	ALSPQQVTRLPSGY	1602.68
Filter10	989.732	3	180417_05_HCD	44.833	17983	DFTAAFPR	2042.72	HexNAc4Hex4NeuAc2
Filter15	822.052	3	180417_05_HCD	44.867	18001	ALSPQQVTRLPSGY	947.329	HexNAcHexNeuAc2
Search3Gly	822.052	3	180417_05_EThcD	44.867	18003	ALSPQQVTRLPSGY		ALSPQQVT(HexNAcHexNeuAc2)RLPSGY	HexNAcHexNeuAc2@256=34	17.1	3.4e-05
Filter15	1232.5	3	180417_05_HCD	44.9	18014	ALSPQQVTRLPSGY	2178.68
Filter05	765.996	3	180417_05_HCD	45.033	18085	ATAPTAQAPR	1312.45	HexNAc2Hex2NeuAc2
Filter15	959.67	4	180417_05_HCD	45.167	18135	AHEVSEISVRTVYPPEE	1893.7
Filter05	766.331	3	180417_05_HCD	45.233	18169	ATAPTAQAPR	1313.45
Filter07	863.365	3	180417_05_HCD	45.267	18190	ATAPTAQAPR	1604.55
Filter07	868.021	3	180417_05_HCD	45.3	18200	DFTAAFPR	1677.59	HexNAc3Hex3NeuAc2
Filter07	863.026	3	180417_05_HCD	45.3	18203	ATAPTAQAPR	1603.54	HexNAc2Hex2NeuAc3
Filter15	1293.75	4	180417_05_HCD	45.433	18278	ATAPTAQAPR	4188.43
Filter05	1240.53	3	180417_05_HCD	45.567	18352	AVAVTLQSH	2794.08
Filter07	943.761	3	180417_05_HCD	45.583	18354	ALSPQQVTRLPSGY	1312.46	HexNAc2Hex2NeuAc2
Search3Gly	943.761	3	180417_05_EThcD	45.583	18357	ALSPQQVTRLPSGY		ALSPQQVT(HexNAcHexNeuAc)RLPS(HexNAcHexNeuAc)GY	HexNAc2Hex2NeuAc2@256||HexNAcHexNeuAc&HexNAcHexNeuAc@(256&260)	16.2	0.00012
SearchAll	943.761	3	180417_05_EThcD	45.583	18357	ALSPQQVTRLPSGY		ALSPQQVT(HexNAc2Hex2NeuAc2)RLPSGY	HexNAc2Hex2NeuAc2@256=11	16.2	0.003
Filter15	1240.52	3	180417_05_HCD	45.8	18466	AVAVTLQSH	2794.03
Filter07	868.021	3	180417_05_HCD	45.817	18472	DFTAAFPR	1677.59	HexNAc3Hex3NeuAc2
Filter10	964.42	3	180417_05_HCD	45.95	18540	ATAPTAQAPR	1907.72
Filter07	960.399	3	180417_05_HCD	46.183	18674	ATAPTAQAPR	1895.65
Filter05	1439.27	3	180417_05_HCD	46.533	18834	ATAPTAQAPR	3332.28
Filter15	753.634	3	180417_05_HCD	46.65	18902	DFTAAFPR	1334.43	HexNAc2Hex2NeuAc2+Cation:Na
Filter15	1017.22	4	180417_05_HCD	46.783	18964	DFTAAFPR	3141.4
Filter05	624.6	3	180417_05_HCD	48.117	19642	DFTAAFPR	947.328	HexNAcHexNeuAc2
Search3Gly	624.6	3	180417_05_EThcD	48.117	19644	DFTAAFPR		DFT(HexNAcHexNeuAc2)AAFPR	HexNAcHexNeuAc2@145	19.6	1.2e-05
Filter15	894.084	3	180417_05_HCD	48.217	19689	DFTAAFPR	1755.78
Filter15	1147.51	3	180417_05_HCD	48.3	19732	AQDGGPVGTELFR	2093.83
Filter15	1270.52	4	180417_05_HCD	49.667	20432	AQDGGPVGTELF	3888.5
Filter10	1260.28	4	180417_05_HCD	50.133	20649	AQDGGPVGTELF	3847.51
Filter07	854.361	3	180417_05_HCD	50.25	20714	AQDGGPVGTELF	1370.5	HexNAc3Hex2FucNeuAc
