# Supplementary material for: The effectiveness of filtering glycopeptide peak list files for Y ions
Source: Royal Society of Chemistry journal article supplement (doi:10.1039/c9mo00178f), 2020-02-06
Supplement: c9mo00178f3.pdf [file c9mo00178f3.pdf]

VVLHPN(HexNAc5Hex6NeuAc2+Cation:K)YSQVDIGLIK<sup>+4</sup>

VVLHPNYSQVDIGLIK-Cation:K<sup>+4</sup>

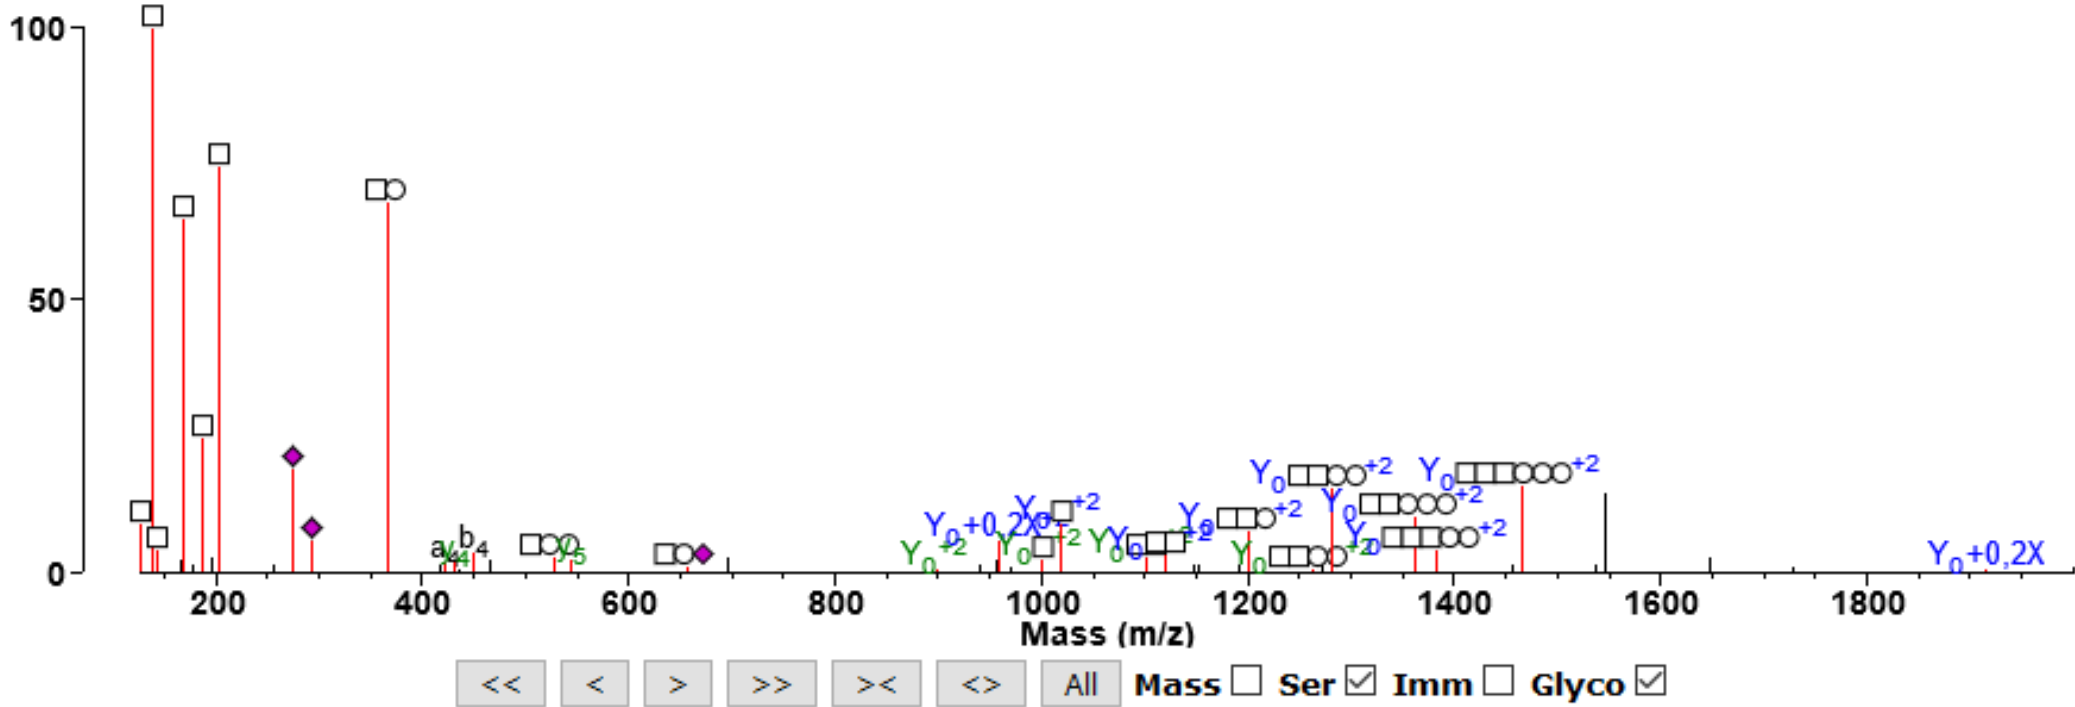

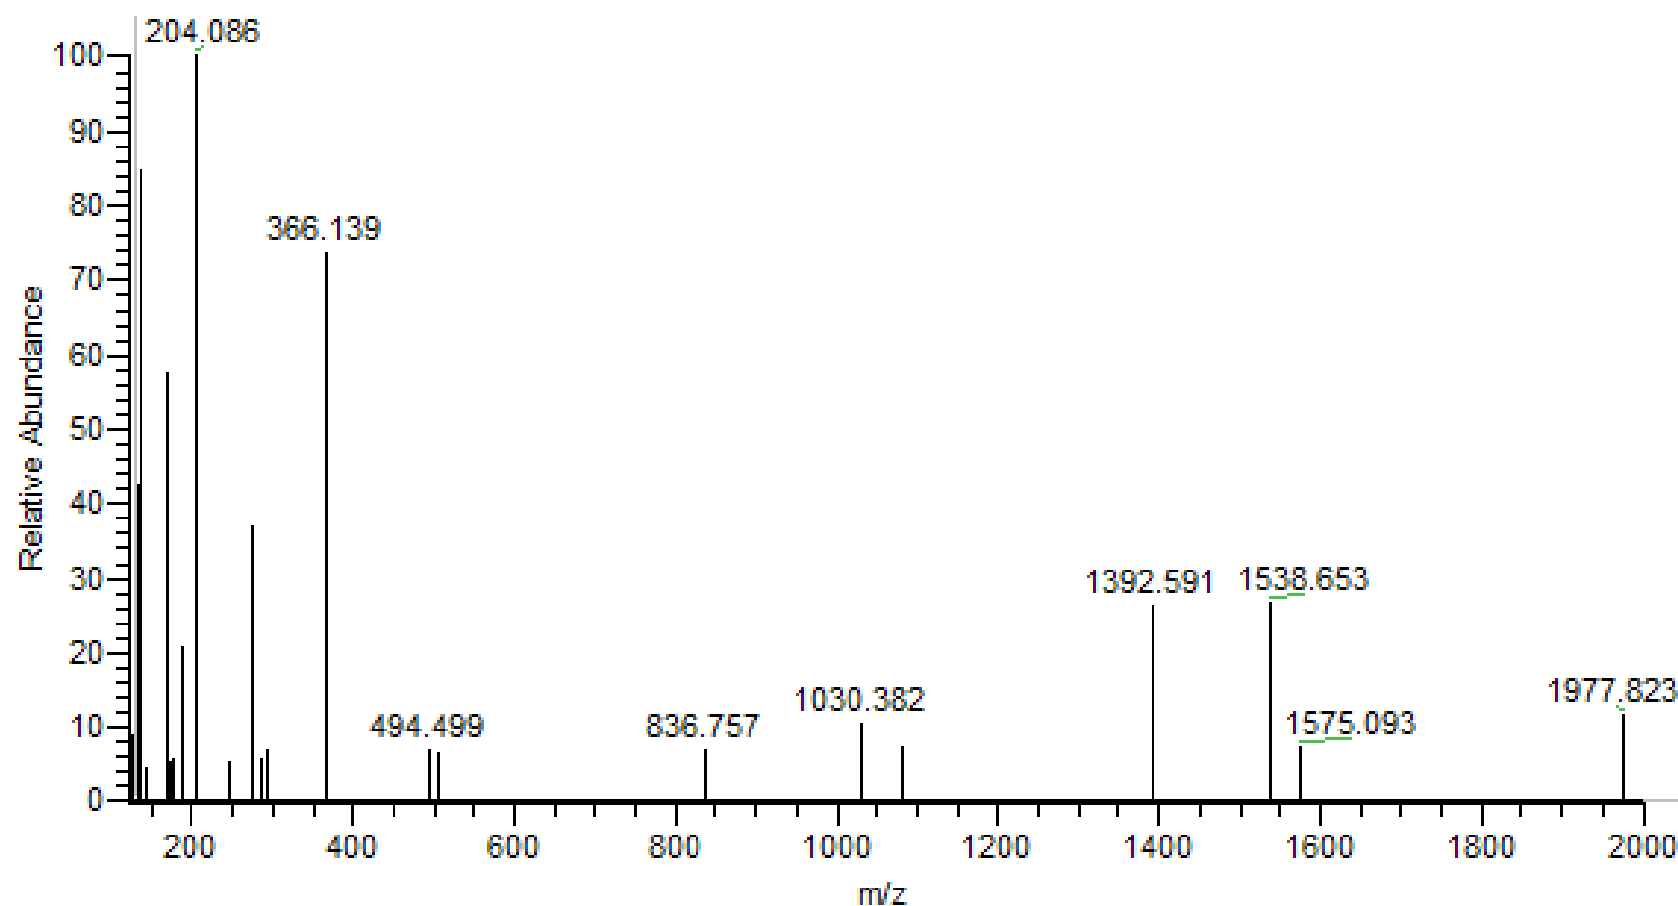

*Figure S2: HCD spectrum of m/z 1083.753 3+ precursor. The corresponding EThcD spectrum identified this precursor as either EEQYN(HexNAc4Hex5FucNeuAc)STYR or EEQFN(HexNAc4Hex6NeuAc)STYR. The peaks at m/z 1392.591 and m/z 1538.653 correspond to EEQYNSTYR+HexNAc and +HexNAcFuc respectively, clarifying that the dityrosine-containing assignment is correct.*

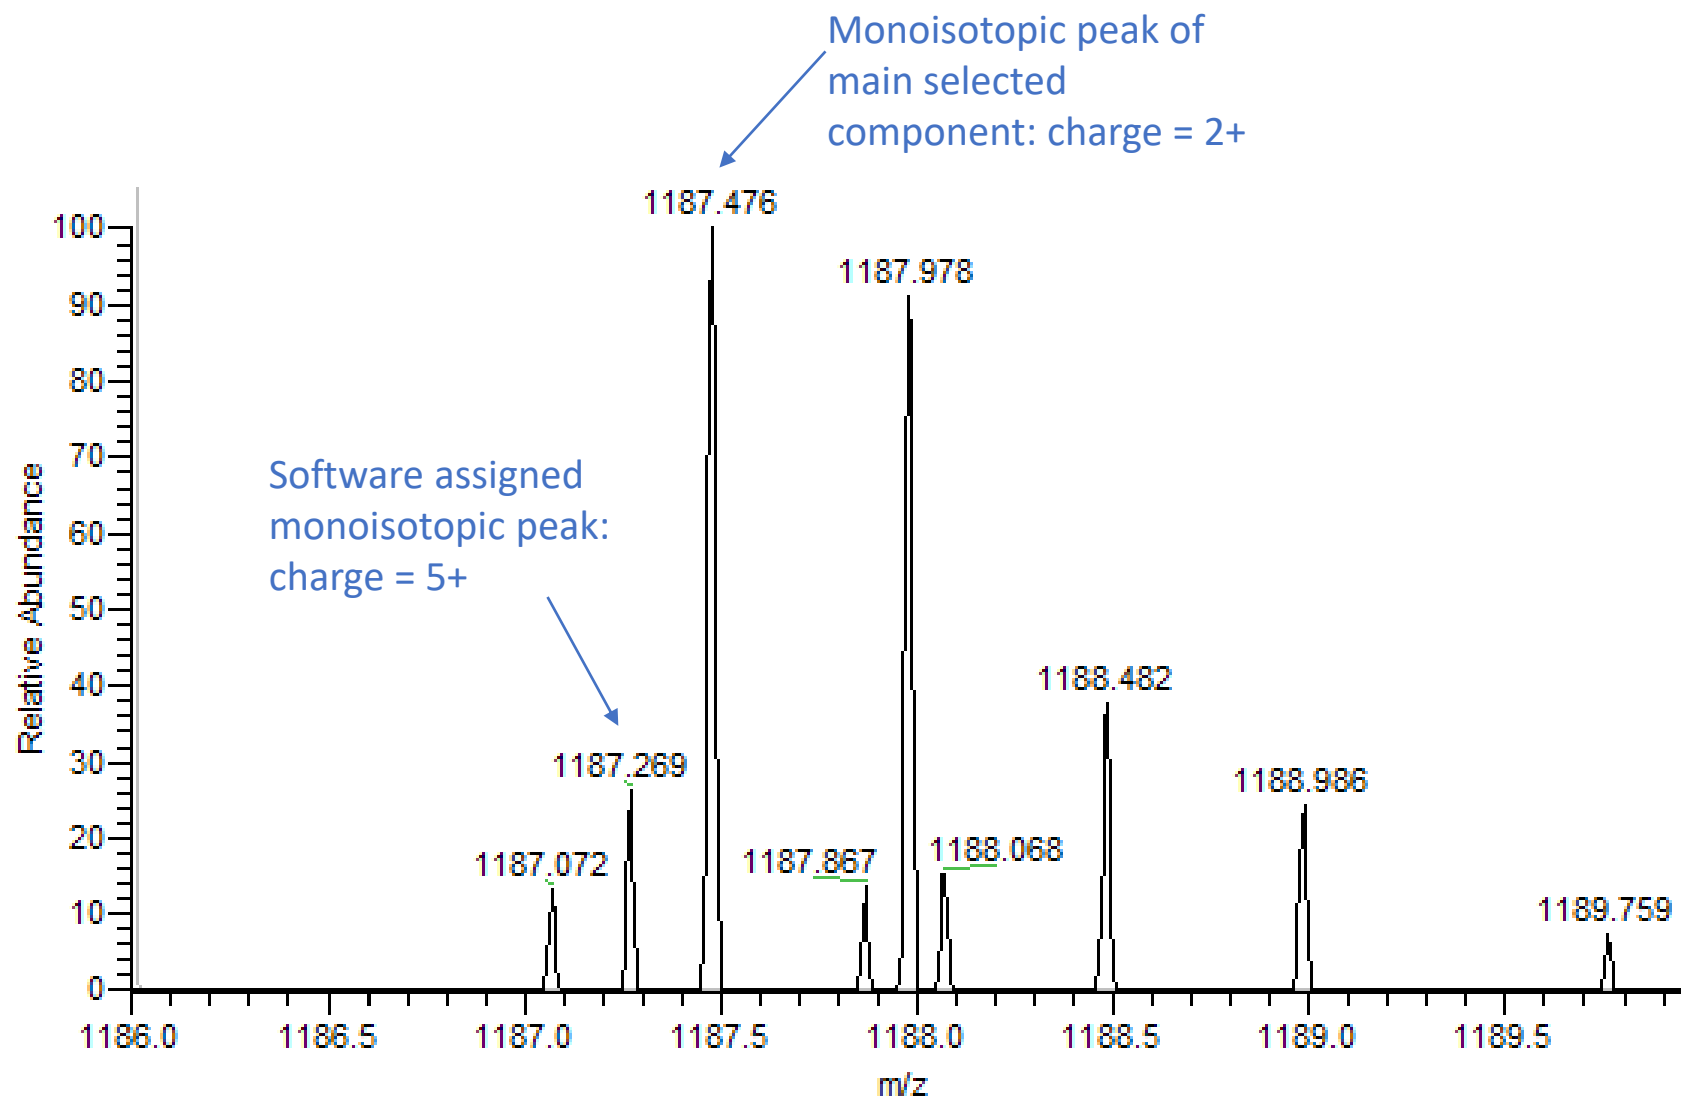

*Figure S3. Isotope cluster selected for MS-MS analysis.* The peak picking software assigned this precursor as  $m/z$  1187.269, whereas the major component is clearly  $m/z$  1187.476 2+. This precursor corresponds to EEQFN(HexNAc2Hex5)STFR.
